# Supplementary material for: A Lack of Parasitic Reduction in the Obligate Parasitic Green Alga Helicosporidium
Source: PLoS Genet. 2014 May 8;10(5):e1004355. doi: 10.1371/journal.pgen.1004355 (PMC4014436; doi:10.1371/journal.pgen.1004355)
Supplement: Table S1 — Distribution of the Chlamydomonas reinhardtii KEGG metabolic pathways in the trebouxiophytes Helicosporidium, Chlorella and Coccomyxa. The Chlamydomonas, Chlorella and Coccomyxa proteins and genomic/transcriptomic contigs are labelled according to the official headers provided in the JGI data (http://genome.jgi.doe.gov/). (XLSX) [file pgen.1004355.s018.xlsx]

## Sheet: Table S1
Table S1: Distribution of the Chlamydomonas reinhardtii KEGG metabolic pathways in the trebouxiophytes Helicosporidium, Chlorella and Coccomyxa and other green algae.
KEGG pathway	Enzyme Commission (EC) number	Product definition	Chlamydomonas reinhardtii		Helicosporidium sp.				Chlorella variabilis NC64A				Coccomyxa subellipsoidea C-169			Ostreococcus tauri	Ostreococcus lucimarinus	Micromonas sp. RCC299	Micromonas pusilla	Volvox carteri f. nagariensis
					Proteins	Genome	RNA		Proteins	Genome	RNA		Proteins	Genome	RNA
00010_Glycolysis_gluconeogenesis
[KO:K00121]	1.1.1.284; 1.1.1.1	S-(hydroxymethyl)glutathione dehydrogenase / alcohol dehydrogenase	CHLREDRAFT_129874		H632_c26p4	contig-26	a21910r144		jgi|ChlNC64A_1|48081|fgenesh3_kg.C_scaffold_1000017	scaffold_1	CBPS_CBWC_CBWF_992_1		jgi|Coc_C169_1|36309|fgenesh1_pm.6_#_157	scaffold_6	2971_1_CBOZ_CBPA	Ot15g01360	OSTLU_27414			VOLCADRAFT_82410
[KO:K00128]	1.2.1.3	aldehyde dehydrogenase (NAD+)	CHLREDRAFT_135609		H632_c1464p0	contig-1464	a16775r225		jgi|ChlNC64A_1|7731|gw1.1.111.1	scaffold_1	CBPS_CBWC_CBWF_498_1		jgi|Coc_C169_1|2147|gw1.23.34.1	scaffold_23	1093_1_CBOZ_CBPA	Ot01g04160	OSTLU_13873	MICPUN_113300	MICPUCDRAFT_55745	VOLCADRAFT_73567
[KO:K00131]	1.2.1.9	glyceraldehyde-3-phosphate dehydrogenase (NADP)	CHLREDRAFT_102889		H632_c1464p0	contig-1464	a9793r275		jgi|ChlNC64A_1|144623|IGS.gm_72_00001	scaffold_72	CBPS_CBWC_CBWF_0_0_CBWC3380.b1		jgi|Coc_C169_1|35498|fgenesh1_pm.3_#_173	scaffold_3	160_1_CBOZ_CBPA	Ot06g02190	OSTLU_12614	MICPUN_96517	MICPUCDRAFT_21064	VOLCADRAFT_56054
[KO:K00134]	1.2.1.12	glyceraldehyde 3-phosphate dehydrogenase	CHLREDRAFT_196442		H632_c302p0	contig-302	a1647r735, a1894r1778		jgi|ChlNC64A_1|9777|gw1.16.103.1, |48781|fgenesh3_pm.C_scaffold_9000014	scaffold_16, 35	CBPS_CBWC_CBWF_0_0_CBPS2331.b1		jgi|Coc_C169_1|38738|fgenesh1_pm.26_#_19, |36450|fgenesh1_pm.7_#_66	scaffold_7, 18	745_1_CBOZ_CBPA	Ot02g05230	OSTLU_35855	MICPUN_104954, 97303	MICPUCDRAFT_27359, 49771	VOLCADRAFT_105878, 83827
[KO:K00161]	1.2.4.1	pyruvate dehydrogenase E1 component subunit alpha	CHLREDRAFT_193810		H632_c18p0	contig-18	a15629r260		jgi|ChlNC64A_1|56254|estExt_fgenesh3_pm.C_160009	scaffold_16	CBPS_CBWC_CBWF_2495_1		jgi|Coc_C169_1|3960|gw1.2.330.1	scaffold_2	1636_1_CBOZ_CBPA	Ot01g05450	OSTLU_29179	MICPUN_89160	MICPUCDRAFT_22101, 23282	VOLCADRAFT_104783, 68179
[KO:K00162]	1.2.4.1	pyruvate dehydrogenase E1 component subunit beta	CHLREDRAFT_139515, 190446		H632_c47p1, c1092p0	contig-47, 1092	a5471r660, a3135r359		jgi|ChlNC64A_1|48963|fgenesh3_pm.C_scaffold_14000037, |134298|IGS.gm_11_00144	scaffold_14, 11	CBPS_CBWC_CBWF_265_1		jgi|Coc_C169_1|35266|fgenesh1_pm.2_#_276, |15625|e_gw1.8.238.1	scaffold_2, 8	3095_1_, 2734_1_CBOZ_CBPA	Ot06g02870	OSTLU_12625	MICPUN_86033	MICPUCDRAFT_58821	VOLCADRAFT_108817, 77470
[KO:K00382]	1.8.1.4	dihydrolipoamide dehydrogenase	CHLREDRAFT_205763, 57890		H632_c2312p0, c1169p1	contig-2312, 1169	a41914r109,a11039r490		jgi|ChlNC64A_1|36173|estExt_Genewise1Plus.C_140425, |48339|fgenesh3_kg.C_scaffold_26000016	scaffold_14, 26	CBPS_CBWC_CBWF_887_1, 548_1		jgi|Coc_C169_1|52481|estExt_fgenesh1_pm.C_20269, |38031|fgenesh1_pm.17_#_60	scaffold_2, 17	2430_1_, 2338_1_CBOZ_CBPA	Ot04g05070, Ot11g03020	OSTLU_15203, 26614	MICPUN_104967, 104984	MICPUCDRAFT_28757, 34732	VOLCADRAFT_83716, 95813
[KO:K00627]	2.3.1.12	pyruvate dehydrogenase E2 component (dihydrolipoamide acetyltransferase)	CHLREDRAFT_149709, 187285, 196500		H632_c1184p0, c3068p1	contig-1184, 3068	a14722r150, a19267r118		jgi|ChlNC64A_1|137866|IGS.gm_2_00333, |49558|fgenesh3_pg.C_scaffold_1000256, |19416|e_gw1.2.83.1	scaffold_2, 1	CBPS_CBWC_CBWF_3122_1		jgi|Coc_C169_1|1519|gw1.2.123.1, |62654|Genemark1.3437_g, |3931|gw1.18.109.1	scaffold_2, 6, 18	2566_1_, 2042_1_CBOZ_CBPA	Ot03g01020, Ot05g03030	OSTLU_2905, 31760	MICPUN_68004, 96637	MICPUCDRAFT_25687, 42270	VOLCADRAFT_79498, 80947
[KO:K00844]	2.7.1.1	hexokinase	CHLREDRAFT_21582						jgi|ChlNC64A_1|53259|fgenesh3_pg.C_scaffold_14000169	scaffold_14			jgi|Coc_C169_1|52463|estExt_fgenesh1_pm.C_20245	scaffold_2	3606_2_CBOZ_CBPA					VOLCADRAFT_67129
[KO:K00850]	2.7.1.11	6-phosphofructokinase 1	CHLREDRAFT_196430, 196624		H632_c2004p0	contig-2004	a11129r247		jgi|ChlNC64A_1|34238|estExt_Genewise1Plus.C_30657	scaffold_2	CBPS_CBWC_CBWF_3429_0_CBWC4084.b1		jgi|Coc_C169_1|3214|gw1.2.267.1, |1715|gw1.1.171.1	scaffold_2	4636_0_CBOZ3672.b1_CBOZ_CBPA	Ot04g00450, Ot14g02170	OSTLU_29493, 37009	MICPUN_63659, 97915	MICPUCDRAFT_23815, 53485	VOLCADRAFT_74177, 78805
[KO:K00873]	2.7.1.40	pyruvate kinase	CHLREDRAFT_118203, 136854, 196263		H632_c144p1, c1108p1	contig-144, 1108	a3345r247		jgi|ChlNC64A_1|34881|estExt_Genewise1Plus.C_60179, |16416|gw1.4.521.1	scaffold_18, 10	CBPS_CBWC_CBWF_348_2, _1822_2		jgi|Coc_C169_1|36469|fgenesh1_pm.7_#_85, |37635|fgenesh1_pm.14_#_69	scaffold_7, 14	3013_1_CBOZ_CBPA	Ot16g00440, Ot16g00530	OSTLU_27708, 40662	MICPUN_100158, 104841, 112645, 56945, 82586, 93072	MICPUCDRAFT_16253, 19660, 48021, 49534, 49922, 64256	VOLCADRAFT_68572, 82954, 84504
[KO:K00927]	2.7.2.3	phosphoglycerate kinase	CHLREDRAFT_132210		H632_c4037p0	contig-4037	a11639r461		jgi|ChlNC64A_1|48093|fgenesh3_kg.C_scaffold_2000001	scaffold_2	CBPS_CBWC_CBWF_2205_1		jgi|Coc_C169_1|17152|e_gw1.11.105.1	scaffold_2	158_1_CBOZ_CBPA	Ot02g05220	OSTLU_30288, 46028	MICPUN_104767, 104803	MICPUCDRAFT_17660, 69728	VOLCADRAFT_81546
[KO:K01568]	4.1.1.1	pyruvate decarboxylase	CHLREDRAFT_127786						jgi|ChlNC64A_1|52583|fgenesh3_pg.C_scaffold_11000159	scaffold_11	CBPS_CBWC_CBWF_770_1		jgi|Coc_C169_1|38356|fgenesh1_pm.20_#_48	scaffold_20						VOLCADRAFT_105183
[KO:K01610]	4.1.1.49	phosphoenolpyruvate carboxykinase (ATP)	CHLREDRAFT_196612		H632_c2237p0	contig-2237	a7407r669		jgi|ChlNC64A_1|49535|fgenesh3_pg.C_scaffold_1000233	scaffold_25	CBPS_CBWC_CBWF_1777_1		jgi|Coc_C169_1|36074|fgenesh1_pm.5_#_173	scaffold_5	797_1_CBOZ_CBPA					VOLCADRAFT_106350, 81482
[KO:K01623]	4.1.2.13	fructose-bisphosphate aldolase, class I	CHLREDRAFT_152892, 196304, 24459, 29185		H632_c455p2	contig-455	a2214r1400		jgi|ChlNC64A_1|139851|IGS.gm_27_00029, |48370|fgenesh3_kg.C_scaffold_36000001, |56358|estExt_fgenesh3_pm.C_260012, |48836|fgenesh3_pm.C_scaffold_11000013	scaffold_11, 26	CBPS_CBWC_CBWF_1016_1, _8_84		jgi|Coc_C169_1|4317|gw1.12.182.1, |5297|gw1.1.458.1, |35631|fgenesh1_pm.4_#_33, |37978|fgenesh1_pm.17_#_7	scaffold_12, 1, 17	412_3_CBOZ_CBPA	Ot01g03020, Ot03g00610	OSTLU_13796, 33820	MICPUN_104729, 104949	MICPUCDRAFT_45108	VOLCADRAFT_69480, 79447, 82483, 83313
[KO:K01689]	4.2.1.11	enolase	CHLREDRAFT_83064		H632_c2793p0	contig-2793	a11683r453		jgi|ChlNC64A_1|136652|IGS.gm_17_00056	scaffold_17	CBPS_CBWC_CBWF_925_1		jgi|Coc_C169_1|38308|fgenesh1_pm.19_#_130	scaffold_19	157_1_CBOZ_CBPA	Ot01g01550	OSTLU_28765	MICPUN_107587	MICPUCDRAFT_43957	VOLCADRAFT_79991
[KO:K01785]	5.1.3.3	aldose 1-epimerase	CHLREDRAFT_187168		H632_c4460p0	contig-4460	a42489r93		jgi|ChlNC64A_1|28901|e_gw1.69.3.1	scaffold_13	CBPS_CBWC_CBWF_3766_0_CBWF2311.b1		jgi|Coc_C169_1|53021|estExt_fgenesh1_pm.C_50104	scaffold_5	2751_1_CBOZ_CBPA	Ot14g03300	OSTLU_51907	MICPUN_87498	MICPUCDRAFT_18425	VOLCADRAFT_108842
[KO:K01792]	5.1.3.15	glucose-6-phosphate 1-epimerase	CHLREDRAFT_183481, 80327		H632_c1300p0, c2871p0	contig-1300, 2871	a14799r254, a75092r31		jgi|ChlNC64A_1|48228|fgenesh3_kg.C_scaffold_11000012	scaffold_23, 11	CBPS_CBWC_CBWF_543_1		jgi|Coc_C169_1|35341|fgenesh1_pm.3_#_16, |52378|estExt_fgenesh1_pm.C_20131	scaffold_3, 2	0_0_CBOZ5893.b1_CBOZ_CBPA	Ot09g03970	OSTLU_34850	MICPUN_109007, 87522, 98755	MICPUCDRAFT_18576	VOLCADRAFT_109718, 81580
[KO:K01803]	5.3.1.1	triosephosphate isomerase (TIM)	CHLREDRAFT_26265		H632_c1491p1	contig-951	a115967r31		jgi|ChlNC64A_1|11092|gw1.15.138.1	scaffold_15	CBPS_CBWC_CBWF_2202_1		jgi|Coc_C169_1|10565|gw1.3.626.1	scaffold_3	3289_1_CBOZ_CBPA	Ot09g00080	OSTLU_24989, 36521, 43602	MICPUN_64258, 86041	MICPUCDRAFT_34435, 46562	VOLCADRAFT_109969
[KO:K01810]	5.3.1.9	glucose-6-phosphate isomerase	CHLREDRAFT_135220		H632_c814p1	contig-814	a10179r108		jgi|ChlNC64A_1|135927|IGS.gm_15_00023	scaffold_2			jgi|Coc_C169_1|46430|estExt_fgenesh1_pg.C_30207	scaffold_3	995_1_CBOZ_CBPA	Ot11g02980	OSTLU_17428	MICPUN_104983	MICPUCDRAFT_20452	VOLCADRAFT_103185
[KO:K01834]	5.4.2.11	2,3-bisphosphoglycerate-dependent phosphoglycerate mutase	CHLREDRAFT_99328																	VOLCADRAFT_96867
[KO:K01835]	5.4.2.2	phosphoglucomutase	CHLREDRAFT_146213, 81483		H632_c1323p0	contig-1323	a6467r182		jgi|ChlNC64A_1|35765|estExt_Genewise1Plus.C_120203, |36032|estExt_Genewise1Plus.C_140114	scaffold_12, 14	CBPS_CBWC_CBWF _875_1, _3668_0_CBWC7715.b1		jgi|Coc_C169_1|17632|e_gw1.12.65.1	scaffold_12	3984_1_CBOZ_CBPA	Ot15g02630	OSTLU_42958	MICPUN_112722	MICPUCDRAFT_70805	VOLCADRAFT_78928
[KO:K01895]	6.2.1.1	acetyl-CoA synthetase	CHLREDRAFT_139750, 194063		H632_c2938p0	contig-2938	a7369r188		jgi|ChlNC64A_1|25835|e_gw1.18.20.1, |53931|fgenesh3_pg.C_scaffold_18000121	scaffold_32	CBPS_CBWC_CBWF_4016_0_CBWF7227.b1		jgi|Coc_C169_1|40843|fgenesh1_pg.5_#_46, |37408|fgenesh1_pm.12_#_151	scaffold_12	5109_0_CBOZ8412.b1_CBOZ_CBPA	Ot02g04430	OSTLU_44757	MICPUN_104547	MICPUCDRAFT_70212	VOLCADRAFT_103924, 58278
[KO:K03841]	3.1.3.11	fructose-1,6-bisphosphatase I	CHLREDRAFT_24084		H632_c1274p0	contig-2061	a18659r163		jgi|ChlNC64A_1|51910|fgenesh3_pg.C_scaffold_8000197	scaffold_8	CBPS_CBWC_CBWF_2451_1		jgi|Coc_C169_1|35430|fgenesh1_pm.3_#_105	scaffold_3	3240_1_CBOZ_CBPA	Ot03g00330	OSTLU_15350, 25840, 30353	MICPUN_103879, 87980, 96739	MICPUCDRAFT_14054, 14601, 48988	VOLCADRAFT_103791
[KO:K15633]	5.4.2.12	2,3-bisphosphoglycerate-independent phosphoglycerate mutase	CHLREDRAFT_196305		H632_c319p1	contig-319	a23118r78		jgi|ChlNC64A_1|32045|estExt_Genewise1.C_160124	scaffold_16	CBPS_CBWC_CBWF_1597_0_CBWF1574.g1		jgi|Coc_C169_1|16738|e_gw1.10.92.1	scaffold_10	3241_1_CBOZ_CBPA	Ot08g02410	OSTLU_33106	MICPUN_96333	MICPUCDRAFT_26927	VOLCADRAFT_108845, 71079
[KO:K15634]	5.4.2.12	probable phosphoglycerate mutase	CHLREDRAFT_21373, 8761						jgi|ChlNC64A_1|134218|IGS.gm_11_00064	scaffold_11			jgi|Coc_C169_1|14251|e_gw1.5.202.1, |15989|e_gw1.8.331.1	scaffold_5		Ot07g03920	OSTLU_35517	MICPUN_50990, 79152	MICPUCDRAFT_41868	VOLCADRAFT_108568, 93926
00020_Citrate_cycle_TCA
[KO:K00025]	1.1.1.37	malate dehydrogenase	CHLREDRAFT_158129		H632_c1713p1	contig-1713	a1740r1589		jgi|ChlNC64A_1|36737|estExt_Genewise1Plus.C_210009	scaffold_1	CBPS_CBWC_CBWF_1762_1		jgi|Coc_C169_1|42884|fgenesh1_pg.11_#_92	scaffold_4	1790_1_CBOZ_CBPA	Ot06g00180	OSTLU_87414	MICPUN_99233	MICPUCDRAFT_49609	VOLCADRAFT_109769
[KO:K00026]	1.1.1.37	malate dehydrogenase	CHLREDRAFT_126023, 137163, 60444		H632_c1281p0	contig-1281	a17151r67, a44657r66, a6113r424		jgi|ChlNC64A_1|20080|e_gw1.3.256.1, |55945|estExt_fgenesh3_pm.C_10044, |48356|fgenesh3_kg.C_scaffold_29000007	scaffold_29, 3	CBPS_CBWC_CBWF_1446_1,1129_1		jgi|Coc_C169_1|37816|fgenesh1_pm.15_#_92, |62531|Genemark1.3314_g, |5287|gw1.4.481.1	scaffold_15, 6, 4	3145_1_, 2114_1_CBOZ_CBPA	Ot03g00170, Ot06g02460	OSTLU_12282, 24671, 32875	MICPUN_94075, 96518, 97181	MICPUCDRAFT_37587, 63993	VOLCADRAFT_75816, 77493, 82979
[KO:K00030]	1.1.1.41	isocitrate dehydrogenase (NAD+)	CHLREDRAFT_196042, 196044		H632_c246p2	contig-246	a11481r295		jgi|ChlNC64A_1|56098|estExt_fgenesh3_pm.C_60016	scaffold_6	CBPS_CBWC_CBWF_1123_1		jgi|Coc_C169_1|53375|estExt_fgenesh1_pm.C_70087, |15531|e_gw1.7.260.1	scaffold_7	1956_0_CBOZ1363.b1_, 3964_1_CBOZ_CBPA					VOLCADRAFT_104752, 119675
[KO:K00031]	1.1.1.42	isocitrate dehydrogenase	CHLREDRAFT_196567		H632_c51p2	contig-51	a4695r496		jgi|ChlNC64A_1|55969|estExt_fgenesh3_pm.C_20016	scaffold_2	CBPS_CBWC_CBWF_1646_1		jgi|Coc_C169_1|25423|estExt_Genewise1.C_160127	scaffold_16	4513_0_CBOZ2228.b1_CBOZ_CBPA		OSTLU_47417			VOLCADRAFT_77629
[KO:K00161]	1.2.4.1	pyruvate dehydrogenase E1 component subunit alpha	CHLREDRAFT_193810		H632_c18p0	contig-18	a15629r260		jgi|ChlNC64A_1|56254|estExt_fgenesh3_pm.C_160009	scaffold_16	CBPS_CBWC_CBWF_2495_1		jgi|Coc_C169_1|3960|gw1.2.330.1	scaffold_2	1636_1_CBOZ_CBPA	Ot01g05450	OSTLU_29179	MICPUN_89160	MICPUCDRAFT_22101, 23282	VOLCADRAFT_104783, 68179
[KO:K00162]	1.2.4.1	pyruvate dehydrogenase E1 component subunit beta	CHLREDRAFT_139515, 190446		H632_c47p1, c1092p0	contig-47, 1092	a5471r660, a3135r359		jgi|ChlNC64A_1|48963|fgenesh3_pm.C_scaffold_14000037, |134298|IGS.gm_11_00144	scaffold_14, 11	CBPS_CBWC_CBWF_265_1		jgi|Coc_C169_1|35266|fgenesh1_pm.2_#_276, |15625|e_gw1.8.238.1	scaffold_2, 8	3095_1_, 2734_1_CBOZ_CBPA	Ot06g02870	OSTLU_12625	MICPUN_86033	MICPUCDRAFT_58821	VOLCADRAFT_108817, 77470
[KO:K00164]	1.2.4.2	2-oxoglutarate dehydrogenase E1 component	CHLREDRAFT_79471		H632_c354p0	contig-354	a9402r137		jgi|ChlNC64A_1|51381|fgenesh3_pg.C_scaffold_6000195	scaffold_6	CBPS_CBWC_CBWF_338_1		jgi|Coc_C169_1|36395|fgenesh1_pm.7_#_11	scaffold_7	1884_0_CBOZ3969.b1_CBOZ_CBPA	Ot03g02230, Ot16g00490	OSTLU_49109	MICPUN_104793, 82522	MICPUCDRAFT_19691, 35900	VOLCADRAFT_74810
[KO:K00234]	1.3.5.1	succinate dehydrogenase (ubiquinone) flavoprotein subunit	CHLREDRAFT_195972		H632_c721p1	contig-721	a4666r282		jgi|ChlNC64A_1|58092|estExt_fgenesh3_pg.C_120151	scaffold_12	CBPS_CBWC_CBWF_1681_1		jgi|Coc_C169_1|37858|fgenesh1_pm.16_#_23	scaffold_16	1975_1_CBOZ_CBPA	Ot14g00120	OSTLU_29304	MICPUN_106467	MICPUCDRAFT_30055	VOLCADRAFT_74298
[KO:K00235]	1.3.5.1	succinate dehydrogenase (ubiquinone) iron-sulfur subunit	CHLREDRAFT_142231		H632_c965p1	contig-965	a1374r1139		jgi|ChlNC64A_1|52030|fgenesh3_pg.C_scaffold_9000055	scaffold_9			jgi|Coc_C169_1|15806|e_gw1.8.291.1	scaffold_8		Ot15g00650	OSTLU_43363	MICPUN_105014	MICPUCDRAFT_48178	VOLCADRAFT_78776
[KO:K00236]	---	succinate dehydrogenase (ubiquinone) cytochrome b560 subunit	CHLREDRAFT_195641		H632_c649p1	contig-649	a84146r73		jgi|ChlNC64A_1|139097|IGS.gm_23_00088	scaffold_23			jgi|Coc_C169_1|52339|estExt_fgenesh1_pm.C_20087	scaffold_2	834_1_CBOZ_CBPA	Ot06g03360	OSTLU_10487	MICPUN_55738	MICPUCDRAFT_69902
[KO:K00382]	1.8.1.4	dihydrolipoamide dehydrogenase	CHLREDRAFT_205763, 57890		H632_c2312p0, c1169p1	contig-2312, 1169	a41914r109, a11039r490		jgi|ChlNC64A_1|36173|estExt_Genewise1Plus.C_140425, |48339|fgenesh3_kg.C_scaffold_26000016	scaffold_14, 26	CBPS_CBWC_CBWF_887_1, _548_1		jgi|Coc_C169_1|52481|estExt_fgenesh1_pm.C_20269, |38031|fgenesh1_pm.17_#_60	scaffold_2, 17	2430_1_, 2338_1_CBOZ_CBPA	Ot04g05070, Ot11g03020	OSTLU_15203, 26614	MICPUN_104967, 104984	MICPUCDRAFT_28757, 34732	VOLCADRAFT_83716, 95813
[KO:K00627]	2.3.1.12	pyruvate dehydrogenase E2 component (dihydrolipoamide acetyltransferase)	CHLREDRAFT_149709, 187285, 196500		H632_c1184p0, c3068p1	contig-1184, 3068	a14722r150, a19267r118		jgi|ChlNC64A_1|137866|IGS.gm_2_00333, |49558|fgenesh3_pg.C_scaffold_1000256, |19416|e_gw1.2.83.1	scaffold_2, 1	CBPS_CBWC_CBWF_3122_1		jgi|Coc_C169_1|1519|gw1.2.123.1, |62654|Genemark1.3437_g, |3931|gw1.18.109.1	scaffold_2, 6, 18	2566_1_, 2042_1_CBOZ_CBPA	Ot03g01020, Ot05g03030	OSTLU_2905, 31760	MICPUN_68004, 96637	MICPUCDRAFT_25687, 42270	VOLCADRAFT_79498, 80947
[KO:K00658]	2.3.1.61	2-oxoglutarate dehydrogenase E2 component (dihydrolipoamide succinyltransferase)	CHLREDRAFT_145987		H632_c1100p1	contig-1100	a16480r229		jgi|ChlNC64A_1|19906|e_gw1.3.139.1	scaffold_3	CBPS_CBWC_CBWF_3124_1		jgi|Coc_C169_1|46126|estExt_fgenesh1_pg.C_20204	scaffold_2	3322_1_CBOZ_CBPA	Ot06g04370	OSTLU_119464	MICPUN_104943	MICPUCDRAFT_65465	VOLCADRAFT_81632
[KO:K01610]	4.1.1.49	phosphoenolpyruvate carboxykinase (ATP)	CHLREDRAFT_196612		H632_c2237p0	contig-2237	a7407r669		jgi|ChlNC64A_1|49535|fgenesh3_pg.C_scaffold_1000233	scaffold_25	CBPS_CBWC_CBWF_1777_1		jgi|Coc_C169_1|36074|fgenesh1_pm.5_#_173	scaffold_5	797_1_CBOZ_CBPA					VOLCADRAFT_106350, 81482
[KO:K01647]	2.3.3.1	citrate synthase	CHLREDRAFT_194915, 24263		H632_c73p0, c766p0	contig-73, 766	a4294r506, a44777r62		jgi|ChlNC64A_1|36373|estExt_Genewise1Plus.C_160155, |142756|IGS.gm_5_00085	scaffold_16, 5	CBPS_CBWC_CBWF_1772_2		jgi|Coc_C169_1|52535|estExt_fgenesh1_pm.C_30017, |36898|fgenesh1_pm.9_#_155	scaffold_3, 9	3389_1_, 1131_1_CBOZ_CBPA	Ot05g01770, Ot17g02320	OSTLU_24535, 37633	MICPUN_104822, 77978	MICPUCDRAFT_43905, 54016	VOLCADRAFT_79933, 82870
[KO:K01648]	2.3.3.8	ATP citrate (pro-S)-lyase	CHLREDRAFT_186611, 196544		H632_c3215p1, c1145p0	contig-3215, 1145	a18761r308, a4474r332		jgi|ChlNC64A_1|35650|estExt_Genewise1Plus.C_110353, |48658|fgenesh3_pm.C_scaffold_5000045	scaffold_11, 5	CBPS_CBWC_CBWF_832_1, _2612_1		jgi|Coc_C169_1|36662|fgenesh1_pm.8_#_62, |35993|fgenesh1_pm.5_#_92	scaffold_8, 5	1519_1_, 4146_1_CBOZ_CBPA					VOLCADRAFT_79099, 97107
[KO:K01676]	4.2.1.2	fumarate hydratase, class I	CHLREDRAFT_195953														OSTLU_86934	MICPUN_58123	MICPUCDRAFT_46951	VOLCADRAFT_77105
[KO:K01679]	4.2.1.2	fumarate hydratase, class II	CHLREDRAFT_196655		H632_c2812p1	contig-2812	a50863r65		jgi|ChlNC64A_1|29769|estExt_Genewise1.C_30306	scaffold_3	CBPS_CBWC_CBWF_0_0_CBWF6360.b1		jgi|Coc_C169_1|12444|e_gw1.2.276.1	scaffold_2		Ot10g01390	OSTLU_46735	MICPUN_96474	MICPUCDRAFT_43834	VOLCADRAFT_62042
[KO:K01681]	4.2.1.3	aconitate hydratase	CHLREDRAFT_129025		H632_c374p1	contig-374	a1302r398		jgi|ChlNC64A_1|19655|e_gw1.3.393.1	scaffold_3	CBPS_CBWC_CBWF_744_1		jgi|Coc_C169_1|52444|estExt_fgenesh1_pm.C_20218	scaffold_2	1473_1_CBOZ_CBPA					VOLCADRAFT_76010
[KO:K01899]	6.2.1.4; 6.2.1.5	succinyl-CoA synthetase alpha subunit	CHLREDRAFT_196570		H632_c1190p0	contig-1190	a599r276		jgi|ChlNC64A_1|141133|IGS.gm_31_00076	scaffold_31	CBPS_CBWC_CBWF_832_1		jgi|Coc_C169_1|38191|fgenesh1_pm.19_#_13	scaffold_19	938_1_CBOZ_CBPA	Ot03g05850	OSTLU_30915	MICPUN_54789	MICPUCDRAFT_45127	VOLCADRAFT_107577
[KO:K01900]	6.2.1.4; 6.2.1.5	succinyl-CoA synthetase beta subunit	CHLREDRAFT_24101		H632_c3367p0	contig-3367	a4199r506		jgi|ChlNC64A_1|139908|IGS.gm_27_00086	scaffold_27	CBPS_CBWC_CBWF_2222_1		jgi|Coc_C169_1|4111|gw1.19.128.1	scaffold_19	4348_1_CBOZ_CBPA		OSTLU_31367	MICPUN_104715	MICPUCDRAFT_34011	VOLCADRAFT_104417
[KO:K01958]	6.4.1.1	pyruvate carboxylase	CHLREDRAFT_112730		H632_c600p0	contig-2401	a22437r131		jgi|ChlNC64A_1|138936|IGS.gm_22_00177	scaffold_22	CBPS_CBWC_CBWF_3301_0_CBWC2104.b1		jgi|Coc_C169_1|70|gw1.26.1.1	scaffold_26	4181_1_CBOZ_CBPA	Ot08g00930	OSTLU_32964	MICPUN_96455	MICPUCDRAFT_70187	VOLCADRAFT_102707
00030_Pentose-phosphate_pathway
[KO:K00033]	1.1.1.44	6-phosphogluconate dehydrogenase	CHLREDRAFT_192597		H632_c888p0	contig-888	a8276r350		jgi|ChlNC64A_1|143099|IGS.gm_5_00428	scaffold_5	CBPS_CBWC_CBWF_1987_1		jgi|Coc_C169_1|52491|estExt_fgenesh1_pm.C_20282	scaffold_2	1988_0_CBOZ3061.b1_CBOZ_CBPA	Ot07g04130	OSTLU_32825	MICPUN_94461	MICPUCDRAFT_28256	VOLCADRAFT_109207
[KO:K00036]	1.1.1.49	glucose-6-phosphate 1-dehydrogenase	CHLREDRAFT_119861, 173841		H632_c155p0, c716p1	contig-716	a17089r179, a29790r105		jgi|ChlNC64A_1|36394|estExt_Genewise1Plus.C_160203, |52690|fgenesh3_pg.C_scaffold_12000015	scaffold_16, 12	CBPS_CBWC_CBWF_490_1, _490_0_CBWC2042.g1		jgi|Coc_C169_1|36636|fgenesh1_pm.8_#_36, |52161|estExt_fgenesh1_pm.C_10150	scaffold_1	1258_1_, 102_1_CBOZ_CBPA	Ot05g04760	OSTLU_45668	MICPUN_104959, 78783, 86118	MICPUCDRAFT_15872, 18868, 49510	VOLCADRAFT_82038
[KO:K00615]	2.2.1.1	transketolase	CHLREDRAFT_141319		H632_c699p0	contig-699	a12415r118		jgi|ChlNC64A_1|58062|estExt_fgenesh3_pg.C_120080	scaffold_12	CBPS_CBWC_CBWF_288_1		jgi|Coc_C169_1|49177|estExt_fgenesh1_pg.C_220069	scaffold_22	4304_1_CBOZ_CBPA	Ot07g04240	OSTLU_16284	MICPUN_104852	MICPUCDRAFT_34943	VOLCADRAFT_75893
[KO:K00616]	2.2.1.2	transaldolase	CHLREDRAFT_196431		H632_c3056p0	contig-3056	a11225r348		jgi|ChlNC64A_1|59034|estExt_fgenesh3_pg.C_240092		CBPS_CBWC_CBWF_855_1		jgi|Coc_C169_1|46153|estExt_fgenesh1_pg.C_20246	scaffold_2	1687_1_CBOZ_CBPA	Ot17g01390	OSTLU_14510, 28085	MICPUN_61125, 72552	MICPUCDRAFT_21519, 59680	VOLCADRAFT_81816
[KO:K00850]	2.7.1.11	6-phosphofructokinase 1	CHLREDRAFT_196430, 196624		H632_c2004p0	contig-2004	a11129r247		jgi|ChlNC64A_1|34238|estExt_Genewise1Plus.C_30657	scaffold_2	CBPS_CBWC_CBWF_3429_0_CBWC4084.b1		jgi|Coc_C169_1|3214|gw1.2.267.1, |1715|gw1.1.171.1	scaffold_2	4636_0_CBOZ3672.b1_CBOZ_CBPA	Ot04g00450, Ot14g02170	OSTLU_29493, 37009	MICPUN_63659, 97915	MICPUCDRAFT_23815, 53485	VOLCADRAFT_74177, 78805
[KO:K00852]	2.7.1.15	ribokinase	CHLREDRAFT_111372		H632_c401p1	contig-401	a65524r69		jgi|ChlNC64A_1|140074|IGS.gm_28_00105	scaffold_2			jgi|Coc_C169_1|15054|e_gw1.6.495.1	scaffold_6			OSTLU_26023, 36777, 41900		MICPUCDRAFT_49773	VOLCADRAFT_106272
[KO:K00948]	2.7.6.1	ribose-phosphate pyrophosphokinase	CHLREDRAFT_137493		H632_c1711p1	contig-1711	a18397r170		jgi|ChlNC64A_1|134289|IGS.gm_11_00135	scaffold_11	CBPS_CBWC_CBWF_867_1		jgi|Coc_C169_1|17124|e_gw1.11.149.1	scaffold_11				MICPUN_83316	MICPUCDRAFT_13173	VOLCADRAFT_82029
[KO:K01057]	3.1.1.31	6-phosphogluconolactonase	CHLREDRAFT_101528		H632_c2654p0	contig-2654	a10418r169		jgi|ChlNC64A_1|36536|estExt_Genewise1Plus.C_180122	scaffold_18	CBPS_CBWC_CBWF_2352_1		jgi|Coc_C169_1|7162|gw1.12.324.1	scaffold_12	1040_1_CBOZ_CBPA	Ot16g01770, Ot17g01100	OSTLU_13316, 28057	MICPUN_63929, 84618	MICPUCDRAFT_39254, 6362	VOLCADRAFT_82562
[KO:K01623]	4.1.2.13	fructose-bisphosphate aldolase, class I	CHLREDRAFT_152892, 196304, 24459, 29185		H632_c455p2	contig-455	a2214r1400		jgi|ChlNC64A_1|139851|IGS.gm_27_00029, |48836|fgenesh3_pm.C_scaffold_11000013, |56358|estExt_fgenesh3_pm.C_260012, |48370|fgenesh3_kg.C_scaffold_36000001	scaffold_11, 26	CBPS_CBWC_CBWF_1016_1, _8_84		jgi|Coc_C169_1|4317|gw1.12.182.1, |35631|fgenesh1_pm.4_#_33, |37978|fgenesh1_pm.17_#_7, |5297|gw1.1.458.1	scaffold_12, 1, 17	412_3_CBOZ_CBPA	Ot01g03020, Ot03g00610	OSTLU_13796, 33820	MICPUN_104729, 104949	MICPUCDRAFT_45108	VOLCADRAFT_69480, 79447, 82483, 83313
[KO:K01783]	5.1.3.1	ribulose-phosphate 3-epimerase	CHLREDRAFT_135614, 6964		H632_c1276p0, c169p2	contig-1276, 169	a101521r61, a44616r49		jgi|ChlNC64A_1|142103|IGS.gm_4_00244, |18474|e_gw1.1.720.1	scaffold_4, 1	CBPS_CBWC_CBWF_445_1		jgi|Coc_C169_1|37863|fgenesh1_pm.16_#_28, |6367|gw1.16.215.1	scaffold_16	1584_1_CBOZ_CBPA	Ot06g01930	OSTLU_17265, 32100, 41053	MICPUN_104768, 80507	MICPUCDRAFT_47473, 58794	VOLCADRAFT_109319
[KO:K01807]	5.3.1.6	ribose 5-phosphate isomerase A	CHLREDRAFT_205912, 55838		H632_c1642p0	contig-1642	a30246r93		jgi|ChlNC64A_1|141332|IGS.gm_33_00042, |48569|fgenesh3_pm.C_scaffold_4000004	scaffold_4	CBPS_CBWC_CBWF_1619_1		jgi|Coc_C169_1|60863|Genemark1.1674_g, |7090|gw1.4.654.1	scaffold_3	4905_0_CBOZ6311.b1_CBOZ_CBPA	Ot05g04200	OSTLU_12567	MICPUN_100773, 97166	MICPUCDRAFT_15487	VOLCADRAFT_104693, 95072
[KO:K01810]	5.3.1.9	glucose-6-phosphate isomerase	CHLREDRAFT_135220		H632_c814p1	contig-814	a10179r108		jgi|ChlNC64A_1|135927|IGS.gm_15_00023	scaffold_2			jgi|Coc_C169_1|46430|estExt_fgenesh1_pg.C_30207	scaffold_3	995_1_CBOZ_CBPA	Ot11g02980	OSTLU_17428	MICPUN_104983	MICPUCDRAFT_20452	VOLCADRAFT_103185
[KO:K01835]	5.4.2.2	phosphoglucomutase	CHLREDRAFT_146213, 81483		H632_c1323p0	contig-1323	a6467r182		jgi|ChlNC64A_1|35765|estExt_Genewise1Plus.C_120203, |36032|estExt_Genewise1Plus.C_140114	scaffold_12, 14	CBPS_CBWC_CBWF_875_1, 3668_0_CBWC7715.b1		jgi|Coc_C169_1|17632|e_gw1.12.65.1	scaffold_12	3984_1_CBOZ_CBPA	Ot15g02630	OSTLU_42958	MICPUN_112722	MICPUCDRAFT_70805	VOLCADRAFT_78928
[KO:K03841]	3.1.3.11	fructose-1,6-bisphosphatase I	CHLREDRAFT_24084		H632_c1274p0	contig-2061	a18659r163		jgi|ChlNC64A_1|51910|fgenesh3_pg.C_scaffold_8000197	scaffold_8	CBPS_CBWC_CBWF_2451_1		jgi|Coc_C169_1|35430|fgenesh1_pm.3_#_105	scaffold_3	3240_1_CBOZ_CBPA	Ot03g00330	OSTLU_15350, 25840, 30353	MICPUN_103879, 87980, 96739	MICPUCDRAFT_14054, 14601, 48988	VOLCADRAFT_103791
00040_Pentose_and_glucuronate_interconversions
[KO:K00012]	1.1.1.22	UDPglucose 6-dehydrogenase	CHLREDRAFT_185081, 205498		H632_c46p3	contig-46	a4671r956		jgi|ChlNC64A_1|48169|fgenesh3_kg.C_scaffold_5000013	scaffold_5	CBPS_CBWC_CBWF_1325_1		jgi|Coc_C169_1|37020|fgenesh1_pm.10_#_108, |3116|gw1.10.150.1	scaffold_10	1745_1_CBOZ_CBPA	Ot13g01740	OSTLU_27143, 29766	MICPUN_91087	MICPUCDRAFT_35067	VOLCADRAFT_107492, 72551
[KO:K00128]	1.2.1.3	aldehyde dehydrogenase (NAD+)	CHLREDRAFT_135609		H632_c1464p0	contig-1464	a16775r225		jgi|ChlNC64A_1|7731|gw1.1.111.1	scaffold_1	CBPS_CBWC_CBWF_498_1		jgi|Coc_C169_1|2147|gw1.23.34.1	scaffold_23	1093_1_CBOZ_CBPA	Ot01g04160	OSTLU_13873	MICPUN_113300	MICPUCDRAFT_55745	VOLCADRAFT_73567
[KO:K00963]	2.7.7.9	UTP--glucose-1-phosphate uridylyltransferase	CHLREDRAFT_157049																	VOLCADRAFT_105295
[KO:K01783]	5.1.3.1	ribulose-phosphate 3-epimerase	CHLREDRAFT_135614, 6964		H632_c1276p0, c169p2	contig-1276, 169	a101521r61, a44616r49		jgi|ChlNC64A_1|142103|IGS.gm_4_00244, 18474|e_gw1.1.720.1	scaffold_4, 1	CBPS_CBWC_CBWF_445_1		jgi|Coc_C169_1|37863|fgenesh1_pm.16_#_28, 6367|gw1.16.215.1	scaffold_16	1584_1_CBOZ_CBPA	Ot06g01930	OSTLU_17265, 32100, 41053	MICPUN_104768, 80507	MICPUCDRAFT_47473, 58794	VOLCADRAFT_109319
[KO:K12447]	2.7.7.64	UDP-sugar pyrophosphorylase	CHLREDRAFT_32796		H632_c267p0	contig-267	a34312r117		jgi|ChlNC64A_1|35168|estExt_Genewise1Plus.C_80295	scaffold_8	CBPS_CBWC_CBWF_3442_0_CBWC4261.g1		jgi|Coc_C169_1|53808|estExt_fgenesh1_pm.C_100138	scaffold_10	1383_1_CBOZ_CBPA	Ot13g02120	OSTLU_51241, 52106	MICPUN_106965	MICPUCDRAFT_60817	VOLCADRAFT_120799
[KO:K16190]	2.7.1.43	glucuronokinase	CHLREDRAFT_141779		H632_c100p3	contig-100	a710762r7		jgi|ChlNC64A_1|9855|gw1.2.196.1	scaffold_2			jgi|Coc_C169_1|20490|e_gw1.22.84.1	scaffold_22	3742_1_CBOZ_CBPA	Ot06g00050	OSTLU_40817	MICPUN_79463	MICPUCDRAFT_17626
00051_Fructose_and_mannose_metabolism
[KO:K00844]	2.7.1.1	hexokinase	CHLREDRAFT_21582						jgi|ChlNC64A_1|53259|fgenesh3_pg.C_scaffold_14000169	scaffold_14			jgi|Coc_C169_1|52463|estExt_fgenesh1_pm.C_20245	scaffold_2	3606_2_CBOZ_CBPA					VOLCADRAFT_67129
[KO:K00850]	2.7.1.11	6-phosphofructokinase 1	CHLREDRAFT_196430, 196624		H632_c2004p0	contig-2004	a11129r247		jgi|ChlNC64A_1|34238|estExt_Genewise1Plus.C_30657	scaffold_2	CBPS_CBWC_CBWF_3429_0_CBWC4084.b1		jgi|Coc_C169_1|3214|gw1.2.267.1, |1715|gw1.1.171.1	scaffold_2	4636_0_CBOZ3672.b1_CBOZ_CBPA	Ot04g00450, Ot14g02170	OSTLU_29493, 37009	MICPUN_63659, 97915	MICPUCDRAFT_23815, 53485	VOLCADRAFT_74177, 78805
[KO:K00966]	2.7.7.13	mannose-1-phosphate guanylyltransferase	CHLREDRAFT_130417		H632_c3685p0	contig-3685	a5016r657		jgi|ChlNC64A_1|133102|IGS.gm_1_00238	scaffold_1			jgi|Coc_C169_1|34950|fgenesh1_pm.1_#_291	scaffold_1	1923_1_CBOZ_CBPA					VOLCADRAFT_81984
[KO:K01103]	2.7.1.105; 3.1.3.46	6-phosphofructo-2-kinase / fructose-2,6-bisphosphatase	CHLREDRAFT_121054, 71915		H632_c3534p0	contig-3534	a46559r71		jgi|ChlNC64A_1|134300|IGS.gm_11_00146	scaffold_11	CBPS_CBWC_CBWF_1780_1		jgi|Coc_C169_1|4130|gw1.18.117.1, |5337|gw1.18.149.1	scaffold_18		Ot01g00020	OSTLU_40330	MICPUN_78129	MICPUCDRAFT_3089	VOLCADRAFT_30993
[KO:K01623]	4.1.2.13	fructose-bisphosphate aldolase, class I	CHLREDRAFT_152892, 196304, 24459, 29185		H632_c455p2	contig-455	a2214r1400		jgi|ChlNC64A_1|139851|IGS.gm_27_00029, |48370|fgenesh3_kg.C_scaffold_36000001, |56358|estExt_fgenesh3_pm.C_260012, |48836|fgenesh3_pm.C_scaffold_11000013	scaffold_11, 26	CBPS_CBWC_CBWF_1016_1, _8_84		jgi|Coc_C169_1|4317|gw1.12.182.1, |35631|fgenesh1_pm.4_#_33, |37978|fgenesh1_pm.17_#_7, |5297|gw1.1.458.1	scaffold_12, 1, 17	412_3_CBOZ_CBPA	Ot01g03020, Ot03g00610	OSTLU_13796, 33820	MICPUN_104729, 104949	MICPUCDRAFT_45108	VOLCADRAFT_69480, 79447, 82483, 83313
[KO:K01803]	5.3.1.1	triosephosphate isomerase (TIM)	CHLREDRAFT_26265		H632_c1491p1	contig-951	a115967r31		jgi|ChlNC64A_1|11092|gw1.15.138.1	scaffold_15	CBPS_CBWC_CBWF_2202_1		jgi|Coc_C169_1|10565|gw1.3.626.1	scaffold_3	3289_1_CBOZ_CBPA	Ot09g00080	OSTLU_24989, 36521, 43602	MICPUN_64258, 86041	MICPUCDRAFT_34435, 46562	VOLCADRAFT_109969
[KO:K01809]	5.3.1.8	mannose-6-phosphate isomerase	CHLREDRAFT_196572		H632_c1154p1	contig-1154	a22091r90		jgi|ChlNC64A_1|139231|IGS.gm_24_00011	scaffold_24	CBPS_CBWC_CBWF_3216_0_CBPS447.b1		jgi|Coc_C169_1|30417|estExt_Genewise1Plus.C_140062	scaffold_14	4748_0_CBOZ4902.b1_CBOZ_CBPA	Ot02g06950	OSTLU_3605	MICPUN_86735	MICPUCDRAFT_27865	VOLCADRAFT_65163
[KO:K01840]	5.4.2.8	phosphomannomutase	CHLREDRAFT_350		H632_c1453p0	contig-1453	a3111r1078		jgi|ChlNC64A_1|48382|fgenesh3_pm.C_scaffold_1000005	scaffold_1			jgi|Coc_C169_1|35225|fgenesh1_pm.2_#_235	scaffold_2	999_1_CBOZ_CBPA
[KO:K03841]	3.1.3.11	fructose-1,6-bisphosphatase I	CHLREDRAFT_24084		H632_c1274p0	contig-2061	a18659r163		jgi|ChlNC64A_1|51910|fgenesh3_pg.C_scaffold_8000197	scaffold_8	CBPS_CBWC_CBWF_2451_1		jgi|Coc_C169_1|35430|fgenesh1_pm.3_#_105	scaffold_3	3240_1_CBOZ_CBPA	Ot03g00330	OSTLU_15350, 25840, 30353	MICPUN_103879, 87980, 96739	MICPUCDRAFT_14054, 14601, 48988	VOLCADRAFT_103791
00052_Galactose_metabolism
[KO:K00844]	2.7.1.1	hexokinase	CHLREDRAFT_21582						jgi|ChlNC64A_1|53259|fgenesh3_pg.C_scaffold_14000169	scaffold_14			jgi|Coc_C169_1|52463|estExt_fgenesh1_pm.C_20245	scaffold_2	3606_2_CBOZ_CBPA					VOLCADRAFT_67129
[KO:K00849]	2.7.1.6	galactokinase	CHLREDRAFT_122621		H632_c8p0	contig-8	a19734r91		jgi|ChlNC64A_1|16515|gw1.5.568.1	scaffold_5	CBPS_CBWC_CBWF_246_1		jgi|Coc_C169_1|43724|fgenesh1_pg.14_#_139	scaffold_14	5071_0_CBOZ8010.b1_CBOZ_CBPA	Ot04g01590	OSTLU_31076	MICPUN_60667, 79406	MICPUCDRAFT_26260	VOLCADRAFT_98854
[KO:K00850]	2.7.1.11	6-phosphofructokinase 1	CHLREDRAFT_196430, 196624		H632_c2004p0	contig-2004	a11129r247		jgi|ChlNC64A_1|34238|estExt_Genewise1Plus.C_30657	scaffold_2	CBPS_CBWC_CBWF_3429_0_CBWC4084.b1		jgi|Coc_C169_1|3214|gw1.2.267.1, |1715|gw1.1.171.1	scaffold_2	4636_0_CBOZ3672.b1_CBOZ_CBPA	Ot04g00450, Ot14g02170	OSTLU_29493, 37009	MICPUN_63659, 97915	MICPUCDRAFT_23815, 53485	VOLCADRAFT_74177, 78805
[KO:K00963]	2.7.7.9	UTP--glucose-1-phosphate uridylyltransferase	CHLREDRAFT_157049																	VOLCADRAFT_105295
[KO:K01190]	3.2.1.23	beta-galactosidase	CHLREDRAFT_118013						jgi|ChlNC64A_1|140909|IGS.gm_3_00648	scaffold_3			jgi|Coc_C169_1|480|gw1.21.14.1	scaffold_21		Ot07g03490	OSTLU_119488	MICPUN_51444	MICPUCDRAFT_70834	VOLCADRAFT_118236
[KO:K01193]	3.2.1.26	beta-fructofuranosidase	CHLREDRAFT_94247		H632_c1726p0	contig-1726	a39272r59		jgi|ChlNC64A_1|138599|IGS.gm_21_00078	scaffold_16	CBPS_CBWC_CBWF_2741_1		jgi|Coc_C169_1|21710|estExt_Genewise1.C_20249	scaffold_1						VOLCADRAFT_34733
[KO:K01784]	5.1.3.2	UDP-glucose 4-epimerase	CHLREDRAFT_139260		H632_c64p0	contig-64	a18401r174		jgi|ChlNC64A_1|48532|fgenesh3_pm.C_scaffold_3000032	scaffold_3	CBPS_CBWC_CBWF_2068_1		jgi|Coc_C169_1|5009|gw1.20.130.1	scaffold_20	3277_1_CBOZ_CBPA	Ot08g01550	OSTLU_42345	MICPUN_83230	MICPUCDRAFT_39596	VOLCADRAFT_77596
[KO:K01835]	5.4.2.2	phosphoglucomutase	CHLREDRAFT_146213, 81483		H632_c1323p0	contig-1323	a6467r182		jgi|ChlNC64A_1|35765|estExt_Genewise1Plus.C_120203, |36032|estExt_Genewise1Plus.C_140114	scaffold_12, 14	CBPS_CBWC_CBWF_875_1, 3668_0_CBWC7715.b1		jgi|Coc_C169_1|17632|e_gw1.12.65.1	scaffold_12	3984_1_CBOZ_CBPA	Ot15g02630	OSTLU_42958	MICPUN_112722	MICPUCDRAFT_70805	VOLCADRAFT_78928
[KO:K06617]	2.4.1.82	raffinose synthase	CHLREDRAFT_205571						jgi|ChlNC64A_1|136344|IGS.gm_16_00067	scaffold_3	CBPS_CBWC_CBWF_178_1		jgi|Coc_C169_1|64074|estExt_Genemark1.C_10082	scaffold_1	3392_2_CBOZ_CBPA	Ot06g02500	OSTLU_744	MICPUN_60513	MICPUCDRAFT_51844	VOLCADRAFT_100756
[KO:K07407]	3.2.1.22	alpha-galactosidase	CHLREDRAFT_116873		H632_c1436p1	contig-1436	a2929r740		jgi|ChlNC64A_1|8942|gw1.18.102.1	scaffold_18			jgi|Coc_C169_1|4730|gw1.12.206.1	scaffold_5	3409_1_CBOZ_CBPA
00053_Ascorbate_and_aldarate_metabolism
[KO:K00012]	1.1.1.22	UDPglucose 6-dehydrogenase	CHLREDRAFT_185081, 205498		H632_c46p3	contig-46	a4671r956		jgi|ChlNC64A_1|48169|fgenesh3_kg.C_scaffold_5000013	scaffold_5	CBPS_CBWC_CBWF_1325_1		jgi|Coc_C169_1|37020|fgenesh1_pm.10_#_108, |3116|gw1.10.150.1	scaffold_10	1745_1_CBOZ_CBPA	Ot13g01740	OSTLU_27143, 29766	MICPUN_91087	MICPUCDRAFT_35067	VOLCADRAFT_107492, 72551
[KO:K00128]	1.2.1.3	aldehyde dehydrogenase (NAD+)	CHLREDRAFT_135609		H632_c1464p0	contig-1464	a16775r225		jgi|ChlNC64A_1|7731|gw1.1.111.1	scaffold_1	CBPS_CBWC_CBWF_498_1		jgi|Coc_C169_1|2147|gw1.23.34.1	scaffold_23	1093_1_CBOZ_CBPA	Ot01g04160	OSTLU_13873	MICPUN_113300	MICPUCDRAFT_55745	VOLCADRAFT_73567
[KO:K00434]	1.11.1.11	L-ascorbate peroxidase	CHLREDRAFT_165193, 186597, 205910		H632_c128p2	contig-128	a358r1518		jgi|ChlNC64A_1|48220|fgenesh3_kg.C_scaffold_11000004, |19254|e_gw1.2.308.1, |55511|fgenesh3_pg.C_scaffold_38000015	scaffold_11, 2, 38	CBPS_CBWC_CBWF_52_1, _0_0_CBWF7149.g1		jgi|Coc_C169_1|61520|Genemark1.2310_g, |38539|fgenesh1_pm.22_#_42, |6537|gw1.18.178.1	scaffold_4, 18, 22	529_1_CBOZ_CBPA	Ot01g03570, Ot08g00200, Ot09g00500	OSTLU_32890, 6186, 93205	MICPUN_109237, 51963, 70664	MICPUCDRAFT_48214, 56164, 8305	VOLCADRAFT_105827, 62034, 82395
[KO:K00469]	1.13.99.1	inositol oxygenase	CHLREDRAFT_116415								CBPS_CBWC_CBWF_1194_1		jgi|Coc_C169_1|8275|gw1.12.399.1	scaffold_12	4085_2_CBOZ_CBPA
[KO:K08232]	1.6.5.4	monodehydroascorbate reductase (NADH)	CHLREDRAFT_139735		H632_c150p2	contig-150	a6087r424		jgi|ChlNC64A_1|134859|IGS.gm_12_00245				jgi|Coc_C169_1|2803|gw1.15.81.1	scaffold_4	186_1_CBOZ_CBPA	Ot05g00850	OSTLU_15314	MICPUN_61108	MICPUCDRAFT_36082	VOLCADRAFT_80444
[KO:K10046]	5.1.3.18; 5.1.3.-	GDP-D-mannose 3', 5'-epimerase	CHLREDRAFT_196952		H632_c625p1	contig-625	a17190r232		jgi|ChlNC64A_1|34028|estExt_Genewise1Plus.C_30118	scaffold_3	CBPS_CBWC_CBWF_2375_1		jgi|Coc_C169_1|35214|fgenesh1_pm.2_#_224	scaffold_2	112_1_CBOZ_CBPA	Ot18g01190	OSTLU_18701	MICPUN_80077	MICPUCDRAFT_46037	VOLCADRAFT_77112
[KO:K10047]	3.1.3.25; 3.1.3.-	inositol-phosphate phosphatase / L-galactose 1-phosphate phosphatase	CHLREDRAFT_120462		H632_c566p2	contig-566	a76423r76		jgi|ChlNC64A_1|11546|gw1.3.350.1	scaffold_3	CBPS_CBWC_CBWF_3186_1		jgi|Coc_C169_1|7195|gw1.6.308.1	scaffold_6	4856_1_CBOZ_CBPA	Ot05g04910	OSTLU_38679	MICPUN_79551	MICPUCDRAFT_15690	VOLCADRAFT_78931
[KO:K12447]	2.7.7.64	UDP-sugar pyrophosphorylase	CHLREDRAFT_32796		H632_c267p0	contig-267	a34312r117		jgi|ChlNC64A_1|35168|estExt_Genewise1Plus.C_80295	scaffold_8	CBPS_CBWC_CBWF_3442_0_CBWC4261.g1		jgi|Coc_C169_1|53808|estExt_fgenesh1_pm.C_100138	scaffold_10	1383_1_CBOZ_CBPA	Ot13g02120	OSTLU_51241, 52106	MICPUN_106965	MICPUCDRAFT_60817	VOLCADRAFT_120799
[KO:K14190]	2.7.7.69	GDP-L-galactose phosphorylase	CHLREDRAFT_113717		H632_c1024p0	contig-1024	a30034r138		jgi|ChlNC64A_1|50786|fgenesh3_pg.C_scaffold_4000285	scaffold_4	CBPS_CBWC_CBWF_807_0_CBWC5151.b1		jgi|Coc_C169_1|13851|e_gw1.4.363.1	scaffold_4	1542_1_CBOZ_CBPA			MICPUN_64582		VOLCADRAFT_58668
[KO:K16190]	2.7.1.43	glucuronokinase	CHLREDRAFT_141779		H632_c100p3	contig-100	a710762r7		jgi|ChlNC64A_1|9855|gw1.2.196.1	scaffold_2			jgi|Coc_C169_1|20490|e_gw1.22.84.1	scaffold_22	3742_1_CBOZ_CBPA	Ot06g00050	OSTLU_40817	MICPUN_79463	MICPUCDRAFT_17626
00061_Fatty_acid_biosynthesis
[KO:K00059]	1.1.1.100	3-oxoacyl-[acyl-carrier protein] reductase	CHLREDRAFT_114298, 132065		H632_c4659p0, c2450p0	contig-4659, 2450	a8909r423, a12304r75		jgi|ChlNC64A_1|10140|gw1.11.128.1, |134318|IGS.gm_11_00164	scaffold_11	CBPS_CBWC_CBWF_1973_1, _2889_1		jgi|Coc_C169_1|36700|fgenesh1_pm.8_#_100, |38413|fgenesh1_pm.20_#_105	scaffold_8, 20	2916_1_, 2417_1_CBOZ_CBPA	Ot01g02200	OSTLU_12103	MICPUN_113389	MICPUCDRAFT_55323	VOLCADRAFT_60269, 79385
[KO:K00208]	1.3.1.9; 1.3.1.10	enoyl-[acyl-carrier protein] reductase I	CHLREDRAFT_122688		H632_c1571p0	contig-1571	a56545r100		jgi|ChlNC64A_1|48077|fgenesh3_kg.C_scaffold_1000013	scaffold_1	CBPS_CBWC_CBWF_51_1		jgi|Coc_C169_1|65820|estExt_Genemark1.C_60410	scaffold_6	3161_1_CBOZ_CBPA	Ot07g03740	OSTLU_32790	MICPUN_94478	MICPUCDRAFT_28287	VOLCADRAFT_83516
[KO:K00645]	2.3.1.39	[acyl-carrier-protein] S-malonyltransferase	CHLREDRAFT_101671		H632_c4767p0	contig-4767	a24554r118		jgi|ChlNC64A_1|140434|IGS.gm_3_00173	scaffold_3	CBPS_CBWC_CBWF_2700_1		jgi|Coc_C169_1|12311|e_gw1.2.472.1	scaffold_2	3374_1_CBOZ_CBPA	Ot09g03050, Ot20g00030	OSTLU_16833, 42236	MICPUN_113164, 86044	MICPUCDRAFT_70649	VOLCADRAFT_104457
[KO:K00648]	2.3.1.180	3-oxoacyl-[acyl-carrier-protein] synthase III	CHLREDRAFT_123419		H632_c1217p0	contig-1217	a42200r53		jgi|ChlNC64A_1|9328|gw1.10.88.1	scaffold_10	CBPS_CBWC_CBWF_3299_0_CBWC2079.g1		jgi|Coc_C169_1|38634|fgenesh1_pm.24_#_3	scaffold_24	229_0_CBOZ2788.b1_CBOZ_CBPA	Ot15g01930	OSTLU_89176	MICPUN_109209	MICPUCDRAFT_34466	VOLCADRAFT_60981
[KO:K01961]	6.4.1.2; 6.3.4.14	acetyl-CoA carboxylase, biotin carboxylase subunit	CHLREDRAFT_122970		H632_c600p0	contig-600	a37175r103		jgi|ChlNC64A_1|19734|e_gw1.3.665.1	scaffold_3	CBPS_CBWC_CBWF_3301_0_CBWC2104.b1		jgi|Coc_C169_1|52382|estExt_fgenesh1_pm.C_20137	scaffold_2	380_2_CBOZ_CBPA					VOLCADRAFT_77540
[KO:K01962]	6.4.1.2	acetyl-CoA carboxylase carboxyl transferase subunit alpha	CHLREDRAFT_184945		H632_c175p0	contig-175	a2070r339		jgi|ChlNC64A_1|36223|estExt_Genewise1Plus.C_150066	scaffold_15	CBPS_CBWC_CBWF_1521_2		jgi|Coc_C169_1|52652|estExt_fgenesh1_pm.C_30176	scaffold_3	3740_1_CBOZ_CBPA					VOLCADRAFT_120546
[KO:K01963]	6.4.1.2	acetyl-CoA carboxylase carboxyl transferase subunit beta	CHLREDRAFT_133238		H632_c1130p1	contig-1130	a5548r246				CBPS_CBWC_CBWF_1314_1		jgi|Coc_C169_1|9974|gw1.44.5.1	scaffold_44						VOLCADRAFT_82311
[KO:K02160]	---	acetyl-CoA carboxylase biotin carboxyl carrier protein	CHLREDRAFT_185478		H632_c256p0	contig-256	a3839r494		jgi|ChlNC64A_1|142410|IGS.gm_4_00551	scaffold_4	CBPS_CBWC_CBWF_1176_1		jgi|Coc_C169_1|61462|Genemark1.2252_g	scaffold_4	2542_1_CBOZ_CBPA					VOLCADRAFT_81953
[KO:K02372]	4.2.1.59	3-hydroxyacyl-[acyl-carrier-protein] dehydratase	CHLREDRAFT_102512		H632_c503p0	contig-503	a18743r170		jgi|ChlNC64A_1|34566|estExt_Genewise1Plus.C_50030	scaffold_5			jgi|Coc_C169_1|36905|fgenesh1_pm.9_#_162	scaffold_9	159_1_CBOZ_CBPA		OSTLU_12372	MICPUN_107832	MICPUCDRAFT_7220	VOLCADRAFT_74622
[KO:K03921]	1.14.19.2	acyl-[acyl-carrier-protein] desaturase	CHLREDRAFT_205753		H632_c860p0	contig-860	a1292r1867		jgi|ChlNC64A_1|35191|estExt_Genewise1Plus.C_80340	scaffold_5	CBPS_CBWC_CBWF_1857_1		jgi|Coc_C169_1|36963|fgenesh1_pm.10_#_51	scaffold_10	921_1_CBOZ_CBPA	Ot04g03720	OSTLU_15111	MICPUN_107145	MICPUCDRAFT_45722	VOLCADRAFT_109049
[KO:K09458]	2.3.1.179	3-oxoacyl-[acyl-carrier-protein] synthase II	CHLREDRAFT_114457, 139619		H632_c229p3, c506p1	contig-229, 506	a93825r41, a7094r182		jgi|ChlNC64A_1|137140|IGS.gm_18_00246, |16492|gw1.10.323.1	scaffold_18, 26	CBPS_CBWC_CBWF_1582_1, _1438_1		jgi|Coc_C169_1|3771|gw1.1.329.1, |38669|fgenesh1_pm.24_#_38	scaffold_1, 24	652_1_CBOZ_CBPA	Ot02g03940, Ot02g06880, Ot15g01520	OSTLU_13257, 29849, 35878	MICPUN_107159, 107432, 62746	MICPUCDRAFT_3199, 49639, 59921	VOLCADRAFT_101657, 104947, 83790
[KO:K10782]	3.1.2.14; 3.1.2.-	fatty acyl-ACP thioesterase A	CHLREDRAFT_196283		H632_c2297p0	contig-2297	a52486r72		jgi|ChlNC64A_1|145345|IGS.gm_9_00152	scaffold_9			jgi|Coc_C169_1|11733|e_gw1.1.389.1	scaffold_1		Ot01g06550	OSTLU_29285	MICPUN_69109	MICPUCDRAFT_52801	VOLCADRAFT_32542
[KO:K11262]	6.4.1.2; 6.3.4.14	acetyl-CoA carboxylase / biotin carboxylase	CHLREDRAFT_122441		H632_c553p0	contig-553	a76794r50		jgi|ChlNC64A_1|49952|fgenesh3_pg.C_scaffold_2000197	scaffold_2	CBPS_CBWC_CBWF_3301_0_CBWC2104.b1		jgi|Coc_C169_1|1116|gw1.27.8.1	scaffold_27		Ot01g03240	OSTLU_44400	MICPUN_113382	MICPUCDRAFT_31755	VOLCADRAFT_106840
00062_Fatty_acid_elongation
[KO:K01074]	3.1.2.22	palmitoyl-protein thioesterase	CHLREDRAFT_131913		H632_c1307p0	contig-1307	a30136r98		jgi|ChlNC64A_1|35163|estExt_Genewise1Plus.C_80261	scaffold_8	CBPS_CBWC_CBWF_1630_0_CBWF6100.b1		jgi|Coc_C169_1|36942|fgenesh1_pm.10_#_30	scaffold_10	1692_1_CBOZ_CBPA	Ot17g00700		MICPUN_79104	MICPUCDRAFT_33221	VOLCADRAFT_84379
[KO:K07512]	1.3.1.38	mitochondrial trans-2-enoyl-CoA reductase	CHLREDRAFT_101411		H632_c565p1	contig-565	a75116r58		jgi|ChlNC64A_1|143309|IGS.gm_5_00638	scaffold_7	CBPS_CBWC_CBWF_1063_2		jgi|Coc_C169_1|54242|estExt_fgenesh1_pm.C_140077		455_1_CBOZ_CBPA	Ot03g01300	OSTLU_45262	MICPUN_57731	MICPUCDRAFT_4722
[KO:K10258]	1.3.1.93	very-long-chain enoyl-CoA reductase	CHLREDRAFT_602		H632_c257p1	contig-257	a143564r39		jgi|ChlNC64A_1|20732|e_gw1.4.232.1	scaffold_4			jgi|Coc_C169_1|53151|estExt_fgenesh1_pm.C_60024	scaffold_6	282_1_CBOZ_CBPA	Ot03g04010	OSTLU_49170	MICPUN_60190	MICPUCDRAFT_49391	VOLCADRAFT_72272
[KO:K10703]	4.2.1.134	very-long-chain (3R)-3-hydroxyacyl-[acyl-carrier protein] dehydratase	CHLREDRAFT_95439		H632_c446p0	contig-446	a18212r165		jgi|ChlNC64A_1|17502|gw1.2.661.1	scaffold_2			jgi|Coc_C169_1|8169|gw1.5.495.1	scaffold_5			OSTLU_13214, 29682	MICPUN_58684, 59337	MICPUCDRAFT_44656, 58952	VOLCADRAFT_61480, 83422
[KO:K15397]	2.3.1.199	3-ketoacyl-CoA synthase	CHLREDRAFT_138664		H632_c1511p0	contig-1511	a6281r215		jgi|ChlNC64A_1|135728|IGS.gm_14_00261	scaffold_14			jgi|Coc_C169_1|1805|gw1.2.157.1	scaffold_2	559_1_CBOZ_CBPA					VOLCADRAFT_109539
00071_Fatty_acid_metabolism
[KO:K00121]	1.1.1.284; 1.1.1.1	S-(hydroxymethyl)glutathione dehydrogenase / alcohol dehydrogenase	CHLREDRAFT_129874		H632_c26p4	contig-26	a21910r144		jgi|ChlNC64A_1|48081|fgenesh3_kg.C_scaffold_1000017	scaffold_1	CBPS_CBWC_CBWF_992_1		jgi|Coc_C169_1|36309|fgenesh1_pm.6_#_157	scaffold_6	2971_1_CBOZ_CBPA	Ot15g01360	OSTLU_27414			VOLCADRAFT_82410
[KO:K00128]	1.2.1.3	aldehyde dehydrogenase (NAD+)	CHLREDRAFT_135609		H632_c1464p0	contig-1464	a16775r225		jgi|ChlNC64A_1|7731|gw1.1.111.1	scaffold_1	CBPS_CBWC_CBWF_498_1		jgi|Coc_C169_1|2147|gw1.23.34.1	scaffold_23	1093_1_CBOZ_CBPA	Ot01g04160	OSTLU_13873	MICPUN_113300	MICPUCDRAFT_55745	VOLCADRAFT_73567
[KO:K00232]	1.3.3.6	acyl-CoA oxidase	CHLREDRAFT_121379, 122887, 170822, 40101		H632_c2497p0, c413p1, c2049p0	contig-2497, 2049, 5310	a6109r321, a6917r266		jgi|ChlNC64A_1|36152|estExt_Genewise1Plus.C_140395, |135478|IGS.gm_14_00011, |55215|fgenesh3_pg.C_scaffold_32000007, |25082|e_gw1.14.418.1	scaffold_14, 32	CBPS_CBWC_CBWF_1652_1, _2184_1, _3625_0_CBWC7047.b1, _3984_0_CBWF6724.b1		jgi|Coc_C169_1|35254|fgenesh1_pm.2_#_264, |37427|fgenesh1_pm.12_#_170, |14462|e_gw1.5.248.1, |54082|estExt_fgenesh1_pm.C_130004	scaffold_2, 5, 12, 13	3247_1_, 3517_0_CBOZ6919.b1_, 4875_0_CBOZ6060.b1_CBOZ_CBPA	Ot01g02610	OSTLU_13743	MICPUN_80126	MICPUCDRAFT_31340	VOLCADRAFT_104659, 58804, 92640, 93927, 93964
[KO:K00249]	1.3.8.7	acyl-CoA dehydrogenase	CHLREDRAFT_118751		H632_c2446p0	contig-4942	a110980r25		jgi|ChlNC64A_1|26769|e_gw1.22.13.1	scaffold_22			jgi|Coc_C169_1|664|gw1.5.40.1	scaffold_5
[KO:K00626]	2.3.1.9	acetyl-CoA C-acetyltransferase	CHLREDRAFT_118204		H632_c3387p0	contig-3387	a991r574		jgi|ChlNC64A_1|56332|estExt_fgenesh3_pm.C_240017	scaffold_24	CBPS_CBWC_CBWF_2185_1		jgi|Coc_C169_1|4417|gw1.11.146.1	scaffold_11	149_1_CBOZ_CBPA					VOLCADRAFT_75176, 84837
[KO:K01897]	6.2.1.3	long-chain acyl-CoA synthetase	CHLREDRAFT_113915, 123147, 169700, 188925		H632_c66p0, c2393p0, c525p1	contig-66, 2393, 4936	a31r1395, a19432r113		jgi|ChlNC64A_1|133161|IGS.gm_1_00297, |32506|estExt_Genewise1.C_220034, |55794|fgenesh3_pg.C_scaffold_245000001	scaffold_1, 22, 245	CBPS_CBWC_CBWF_113_1, _2141_1, _0_0_CBWF4565.g1		jgi|Coc_C169_1|35915|fgenesh1_pm.5_#_14, |37699|fgenesh1_pm.14_#_133, |2016|gw1.3.114.1	scaffold_22, 5, 14, 3	3123_1_, 583_1_, 3016_1_CBOZ_CBPA	Ot12g01080	OSTLU_24496, 26758	MICPUN_97670	MICPUCDRAFT_46244	VOLCADRAFT_120723, 73402, 73622, 79297
[KO:K07513]	2.3.1.16	acetyl-CoA acyltransferase 1	CHLREDRAFT_138637		H632_c1964p1	contig-1964	a4945r347		jgi|ChlNC64A_1|16660|gw1.6.359.1	scaffold_6	CBPS_CBWC_CBWF_2185_2		jgi|Coc_C169_1|56826|Genemark1.5855_g	scaffold_12	149_1_CBOZ_CBPA		OSTLU_40909	MICPUN_105088	MICPUCDRAFT_44754	VOLCADRAFT_102696
[KO:K10527]	4.2.1.17; 1.1.1.35; 1.1.1.211	enoyl-CoA hydratase/3-hydroxyacyl-CoA dehydrogenase	CHLREDRAFT_132158		H632_c571p0	contig-571	a13565r165		jgi|ChlNC64A_1|48307|fgenesh3_kg.C_scaffold_23000004	scaffold_23	CBPS_CBWC_CBWF_374_1		jgi|Coc_C169_1|38472|fgenesh1_pm.21_#_53	scaffold_21	0_0_CBOZ3767.b1_CBOZ_CBPA		OSTLU_49128	MICPUN_94758	MICPUCDRAFT_45151	VOLCADRAFT_74021
[KO:K13238]	5.3.3.8	3,2-trans-enoyl-CoA isomerase, mitochondrial	CHLREDRAFT_183312		H632_c71p1	contig-71	a6052r507		jgi|ChlNC64A_1|133803|IGS.gm_10_00094	scaffold_10	CBPS_CBWC_CBWF_374_1		jgi|Coc_C169_1|6880|gw1.5.415.1	scaffold_5	333_1_CBOZ_CBPA		OSTLU_28941	MICPUN_55954	MICPUCDRAFT_57324	VOLCADRAFT_77525
00072_Synthesis_and_degradation_of_ketone_bodies
[KO:K00626]	2.3.1.9	acetyl-CoA C-acetyltransferase	CHLREDRAFT_118204		H632_c3387p0	contig-3387	a991r574		jgi|ChlNC64A_1|56332|estExt_fgenesh3_pm.C_240017	scaffold_24	CBPS_CBWC_CBWF_2185_1		jgi|Coc_C169_1|4417|gw1.11.146.1	scaffold_11	149_1_CBOZ_CBPA					VOLCADRAFT_75176, 84837
[KO:K01640]	4.1.3.4	hydroxymethylglutaryl-CoA lyase	CHLREDRAFT_195057		H632_c2327p0	contig-2327	a47812r76		jgi|ChlNC64A_1|10210|gw1.2.213.1	scaffold_2	CBPS_CBWC_CBWF_2314_1		jgi|Coc_C169_1|13706|e_gw1.4.580.1	scaffold_4	3055_1_CBOZ_CBPA					VOLCADRAFT_91759
[KO:K01641]	2.3.3.10	hydroxymethylglutaryl-CoA synthase	CHLREDRAFT_118594		H632_c1131p0	contig-1131	a28319r197		jgi|ChlNC64A_1|50079|fgenesh3_pg.C_scaffold_2000324	scaffold_2			jgi|Coc_C169_1|27384|estExt_Genewise1Plus.C_30063	scaffold_3	3188_1_CBOZ_CBPA					VOLCADRAFT_59473
00100_Steroid_biosynthesis
[KO:K00227]	1.14.21.6	lathosterol oxidase	CHLREDRAFT_59933		H632_c484p0	contig-484	a5317r740		jgi|ChlNC64A_1|37408|estExt_Genewise1Plus.C_290108	scaffold_29	CBPS_CBWC_CBWF_0_0_CBWF7539.g1		jgi|Coc_C169_1|42199|fgenesh1_pg.8_#_247	scaffold_8	4590_0_CBOZ3128.b1_CBOZ_CBPA	Ot05g00940	OSTLU_6297	MICPUN_112695	MICPUCDRAFT_55427	VOLCADRAFT_81225
[KO:K01824]	5.3.3.5	cholestenol delta-isomerase	CHLREDRAFT_160258		H632_c256p2	contig-256	a17349r168		jgi|ChlNC64A_1|50796|fgenesh3_pg.C_scaffold_4000295	scaffold_4	CBPS_CBWC_CBWF_3823_1		jgi|Coc_C169_1|8051|gw1.4.725.1	scaffold_4
[KO:K01853]	5.4.99.8	cycloartenol synthase	CHLREDRAFT_196409		H632_c219p0	contig-219	a4338r368		jgi|ChlNC64A_1|6652|gw1.8.8.1	scaffold_8			jgi|Coc_C169_1|37683|fgenesh1_pm.14_#_117	scaffold_14	5009_0_CBOZ7404.b1_CBOZ_CBPA	Ot03g00850	OSTLU_12302	MICPUN_55325	MICPUCDRAFT_24736	VOLCADRAFT_96220
[KO:K05917]	1.14.13.70	sterol 14-demethylase	CHLREDRAFT_196411		H632_c79p2	contig-79	a8236r327		jgi|ChlNC64A_1|53210|fgenesh3_pg.C_scaffold_14000120	scaffold_14	CBPS_CBWC_CBWF_3527_0_CBWC5570.g1		jgi|Coc_C169_1|37342|fgenesh1_pm.12_#_85	scaffold_12	1911_1_CBOZ_CBPA	Ot11g01460	OSTLU_43938	MICPUN_63226	MICPUCDRAFT_48300	VOLCADRAFT_72667
[KO:K07748]	1.1.1.170	sterol-4alpha-carboxylate 3-dehydrogenase (decarboxylating)	CHLREDRAFT_58501		H632_c686p1	contig-686	a23579r139		jgi|ChlNC64A_1|16893|gw1.2.604.1	scaffold_2	CBPS_CBWC_CBWF_2375_1		jgi|Coc_C169_1|38223|fgenesh1_pm.19_#_45	scaffold_19	2300_1_CBOZ_CBPA					VOLCADRAFT_79975
[KO:K08242]	2.1.1.143	24-methylenesterol C-methyltransferase	CHLREDRAFT_161904		H632_c1280p0	contig-1280	a9292r350		jgi|ChlNC64A_1|52435|fgenesh3_pg.C_scaffold_11000011	scaffold_11	CBPS_CBWC_CBWF_309_0_CBPS686.b1		jgi|Coc_C169_1|4957|gw1.4.449.1	scaffold_4	299_1_CBOZ_CBPA			MICPUN_57838		VOLCADRAFT_103647
[KO:K08246]	5.5.1.9	cycloeucalenol cycloisomerase	CHLREDRAFT_193038		H632_c419p1	contig-419	a27870r96		jgi|ChlNC64A_1|48917|fgenesh3_pm.C_scaffold_13000007	scaffold_13			jgi|Coc_C169_1|65481|estExt_Genemark1.C_50307	scaffold_5	1305_0_CBOZ6559.b1_CBOZ_CBPA	Ot04g04910	OSTLU_6401	MICPUN_76248	MICPUCDRAFT_60333	VOLCADRAFT_109265
[KO:K14674]	3.1.1.3; 3.1.1.13; 3.1.1.4; 2.3.1.51	TAG lipase / steryl ester hydrolase / phospholipase A2 / LPA acyltransferase	CHLREDRAFT_183258		H632_c3616p0	contig-3616	a345383r13		jgi|ChlNC64A_1|50656|fgenesh3_pg.C_scaffold_4000155	scaffold_7	CBPS_CBWC_CBWF_964_1		jgi|Coc_C169_1|3379|gw1.23.53.1	scaffold_23		Ot06g03440, Ot17g02310	OSTLU_4077, 41292	MICPUN_75538	MICPUCDRAFT_3862	VOLCADRAFT_117294
00130_Ubiquinone_and_other_terpenoid-quinone_biosynthesis
[KO:K00457]	1.13.11.27	4-hydroxyphenylpyruvate dioxygenase	CHLREDRAFT_137761, 149028		H632_c1538p1	contig-1538	a5181r407		jgi|ChlNC64A_1|8352|gw1.3.141.1	scaffold_3			jgi|Coc_C169_1|35439|fgenesh1_pm.3_#_114, |12997|e_gw1.3.595.1	scaffold_3	2880_0_CBOZ5386.b1_CBOZ_CBPA	Ot03g03700	OSTLU_45212	MICPUN_79223	MICPUCDRAFT_12391	VOLCADRAFT_62773
[KO:K01661]	4.1.3.36	naphthoate synthase	CHLREDRAFT_112040		H632_c1275p0	contig-1275	a20662r136		jgi|ChlNC64A_1|54622|fgenesh3_pg.C_scaffold_24000006	scaffold_24			jgi|Coc_C169_1|37599|fgenesh1_pm.14_#_33	scaffold_14			OSTLU_40076			VOLCADRAFT_82144
[KO:K02552]	5.4.4.2	menaquinone-specific isochorismate synthase	CHLREDRAFT_120595						jgi|ChlNC64A_1|16488|gw1.2.564.1	scaffold_2			jgi|Coc_C169_1|55202|Genemark1.146_g	scaffold_1			OSTLU_37751			VOLCADRAFT_64823
[KO:K03183]	2.1.1.163; 2.1.1.201	ubiquinone/menaquinone biosynthesis methyltransferase	CHLREDRAFT_133829		H632_c898p2	contig-898	a28584r63		jgi|ChlNC64A_1|134880|IGS.gm_12_00266	scaffold_12	CBPS_CBWC_CBWF_0_0_CBWF4944.g1		jgi|Coc_C169_1|6647|gw1.1.582.1	scaffold_1		Ot07g04380	OSTLU_12765	MICPUN_56113	MICPUCDRAFT_6421	VOLCADRAFT_75878
[KO:K05928]	2.1.1.95	tocopherol O-methyltransferase	CHLREDRAFT_129990		H632_c1280p0	contig-1280	a9292r350		jgi|ChlNC64A_1|10031|gw1.19.89.1	scaffold_19	CBPS_CBWC_CBWF_309_0_CBPS686.b1		jgi|Coc_C169_1|53637|estExt_fgenesh1_pm.C_90079	scaffold_9	3708_1_CBOZ_CBPA	Ot16g00320	OSTLU_40586	MICPUN_59038	MICPUCDRAFT_34805	VOLCADRAFT_105162
[KO:K06125]	2.5.1.-	4-hydroxybenzoate hexaprenyltransferase	CHLREDRAFT_104114		H632_c462p1	contig-462	a265661r16		jgi|ChlNC64A_1|16882|gw1.11.396.1	scaffold_11			jgi|Coc_C169_1|34769|fgenesh1_pm.1_#_110	scaffold_1		Ot14g02600	OSTLU_43450	MICPUN_63456	MICPUCDRAFT_40479	VOLCADRAFT_94540
[KO:K06126]	1.14.13.-	ubiquinone biosynthesis monooxygenase Coq6	CHLREDRAFT_141676						jgi|ChlNC64A_1|49348|fgenesh3_pg.C_scaffold_1000046	scaffold_1			jgi|Coc_C169_1|13982|e_gw1.5.228.1	scaffold_5		Ot10g00800	OSTLU_88383	MICPUN_83519	MICPUCDRAFT_50495	VOLCADRAFT_42415
[KO:K06127]	2.1.1.201	ubiquinone biosynthesis methyltransferase	CHLREDRAFT_113023		H632_c898p2	contig-898	a28584r63		jgi|ChlNC64A_1|11806|gw1.13.120.1	scaffold_13	CBPS_CBWC_CBWF_0_0_CBWF4944.g1		jgi|Coc_C169_1|36188|fgenesh1_pm.6_#_36	scaffold_6		Ot01g04180	OSTLU_39585	MICPUN_113465	MICPUCDRAFT_70668	VOLCADRAFT_83928
[KO:K09833]	---	homogenitisate phytyltransferase	CHLREDRAFT_104647		H632_c183p1	contig-183	a34133r40		jgi|ChlNC64A_1|52381|fgenesh3_pg.C_scaffold_10000166	scaffold_10			jgi|Coc_C169_1|38306|fgenesh1_pm.19_#_128	scaffold_19	0_0_CBOZ3576.b1_CBOZ_CBPA	Ot07g03410	OSTLU_119481	MICPUN_83621	MICPUCDRAFT_13055	VOLCADRAFT_45120
[KO:K09834]	---	tocopherol cyclase	CHLREDRAFT_101649						jgi|ChlNC64A_1|8457|gw1.3.150.1	scaffold_3			jgi|Coc_C169_1|3758|gw1.2.312.1	scaffold_2			OSTLU_39591	MICPUN_68115	MICPUCDRAFT_33085	VOLCADRAFT_42287
[KO:K12501]	---	homogentisate solanesyltransferase	CHLREDRAFT_118917		H632_c183p1	contig-183	a171408r29		jgi|ChlNC64A_1|9585|gw1.9.114.1	scaffold_9	CBPS_CBWC_CBWF_2362_1		jgi|Coc_C169_1|36736|fgenesh1_pm.8_#_136	scaffold_8	0_0_CBOZ3576.b1_CBOZ_CBPA	Ot06g01520	OSTLU_31099, 32069	MICPUN_108125, 60634	MICPUCDRAFT_57188, 58789	VOLCADRAFT_78084
[KO:K12502]	---	MPBQ/MSBQ methyltransferase	CHLREDRAFT_129760						jgi|ChlNC64A_1|50176|fgenesh3_pg.C_scaffold_3000049	scaffold_3			jgi|Coc_C169_1|5749|gw1.2.462.1	scaffold_2						VOLCADRAFT_81811
[KO:K14760]	6.2.1.26	acyl-activating enzyme 14	CHLREDRAFT_146546		H632_c769p0	contig-769			jgi|ChlNC64A_1|52312|fgenesh3_pg.C_scaffold_10000097	scaffold_10	CBPS_CBWC_CBWF_67_1		jgi|Coc_C169_1|61706|Genemark1.2496_g	scaffold_4	3016_1_CBOZ_CBPA	Ot01g06020				VOLCADRAFT_41779
00190_Oxidative_phosporylation
[KO:K00234]	1.3.5.1	succinate dehydrogenase (ubiquinone) flavoprotein subunit	CHLREDRAFT_195972		H632_c721p1	contig-721	a4666r282		jgi|ChlNC64A_1|58092|estExt_fgenesh3_pg.C_120151	scaffold_12	CBPS_CBWC_CBWF_1681_1		jgi|Coc_C169_1|37858|fgenesh1_pm.16_#_23	scaffold_16	1975_1_CBOZ_CBPA	Ot14g00120	OSTLU_29304	MICPUN_106467	MICPUCDRAFT_30055	VOLCADRAFT_74298
[KO:K00235]	1.3.5.1	succinate dehydrogenase (ubiquinone) iron-sulfur subunit	CHLREDRAFT_142231		H632_c965p1	contig-965	a1374r1139		jgi|ChlNC64A_1|52030|fgenesh3_pg.C_scaffold_9000055	scaffold_9			jgi|Coc_C169_1|15806|e_gw1.8.291.1	scaffold_8		Ot15g00650	OSTLU_43363	MICPUN_105014	MICPUCDRAFT_48178	VOLCADRAFT_78776
[KO:K00236]	---	succinate dehydrogenase (ubiquinone) cytochrome b560 subunit	CHLREDRAFT_195641		H632_c649p1	contig-649	a84146r73		jgi|ChlNC64A_1|139097|IGS.gm_23_00088	scaffold_23			jgi|Coc_C169_1|52339|estExt_fgenesh1_pm.C_20087	scaffold_2	834_1_CBOZ_CBPA	Ot06g03360	OSTLU_10487	MICPUN_55738	MICPUCDRAFT_69902
[KO:K00411]	1.10.2.2	ubiquinol-cytochrome c reductase iron-sulfur subunit	CHLREDRAFT_109194, 129128		H632_c39p1	contig-39	a10004r399		jgi|ChlNC64A_1|32676|estExt_Genewise1.C_240144	scaffold_24	CBPS_CBWC_CBWF_0_0_CBWF2799.b1		jgi|Coc_C169_1|59110|Genemark1.1072_g, |35150|fgenesh1_pm.2_#_160	scaffold_2	1286_1_CBOZ_CBPA	Ot13g03160	OSTLU_36665, 41673	MICPUN_94567	MICPUCDRAFT_37463	VOLCADRAFT_77835
[KO:K00413]	---	ubiquinol-cytochrome c reductase cytochrome c1 subunit	CHLREDRAFT_133395		H632_c3216p0	contig-3216	a3978r544		jgi|ChlNC64A_1|53406|fgenesh3_pg.C_scaffold_15000091	scaffold_15	CBPS_CBWC_CBWF_1969_1		jgi|Coc_C169_1|13166|e_gw1.3.399.1	scaffold_3	1437_1_CBOZ_CBPA	Ot17g01790	OSTLU_28125	MICPUN_100752	MICPUCDRAFT_49131	VOLCADRAFT_76796
[KO:K00416]	---	ubiquinol-cytochrome c reductase subunit 6	CHLREDRAFT_81617			contig-1105	a3656r658		jgi|ChlNC64A_1|35030|estExt_Genewise1Plus.C_70313	scaffold_7	CBPS_CBWC_CBWF_0_0_CBPS577.g1		jgi|Coc_C169_1|36648|fgenesh1_pm.8_#_48	scaffold_8	743_1_CBOZ_CBPA		OSTLU_32929	MICPUN_59675	MICPUCDRAFT_9520	VOLCADRAFT_80825
[KO:K00417]	---	ubiquinol-cytochrome c reductase subunit 7	CHLREDRAFT_77031		H632_c1840p0	contig-1840	a2763r1747		jgi|ChlNC64A_1|17868|gw1.2.701.1	scaffold_2	CBPS_CBWC_CBWF_0_0_CBPS2008.b1		jgi|Coc_C169_1|37695|fgenesh1_pm.14_#_129	scaffold_14	1074_1_CBOZ_CBPA	Ot09g02450	OSTLU_94712	MICPUN_113903	MICPUCDRAFT_58923	VOLCADRAFT_78796
[KO:K00419]	---	ubiquinol-cytochrome c reductase subunit 9	CHLREDRAFT_159566				a7244r449								982_1_CBOZ_CBPA	Ot13g01020	OSTLU_27073	MICPUN_59384		VOLCADRAFT_121084
[KO:K01507]	3.6.1.1	inorganic pyrophosphatase	CHLREDRAFT_133620, 137778, 174103		H632_c174p1, c213p1, c2637p0	contig-174, 213, 3191	a4287r610, a99r1969, a4703r510		jgi|ChlNC64A_1|48685|fgenesh3_pm.C_scaffold_6000009, |36672|estExt_Genewise1Plus.C_190181, |48342|fgenesh3_kg.C_scaffold_26000019	scaffold_6, 19, 26	CBPS_CBWC_CBWF_2191_1, _433_1, _3121_1		jgi|Coc_C169_1|36398|fgenesh1_pm.7_#_14, |29301|estExt_Genewise1Plus.C_90105, |54743|estExt_fgenesh1_pm.C_200041	scaffold_7, 9, 20	1882_1_, 131_1_, 972_1_CBOZ_CBPA	Ot01g00990, Ot01g03380, Ot04g03990, Ot16g00230	OSTLU_31307, 39838, 40612, 48479	MICPUN_104824	MICPUCDRAFT_34797, 45236	VOLCADRAFT_76427, 82661
[KO:K01535]	3.6.3.6	H+-transporting ATPase	CHLREDRAFT_182602, 38137, 54949		H632_c12p1	contig-12	a11304r232		jgi|ChlNC64A_1|28178|e_gw1.32.12.1, |37518|estExt_Genewise1Plus.C_320108	scaffold_10, 32	CBPS_CBWC_CBWF_1028_2, _184_1		jgi|Coc_C169_1|36388|fgenesh1_pm.7_#_4, |624|gw1.7.40.1, |15420|e_gw1.7.40.1	scaffold_7	1710_1_CBOZ_CBPA	Ot06g01560	OSTLU_41354	MICPUN_105467	MICPUCDRAFT_18050	VOLCADRAFT_103448, 105176
[KO:K02109]	3.6.3.14	F-type H+-transporting ATPase subunit b	CHLREDRAFT_206190						jgi|ChlNC64A_1|54731|fgenesh3_pg.C_scaffold_25000006	scaffold_25	CBPS_CBWC_CBWF_2606_1		jgi|Coc_C169_1|15356|e_gw1.7.340.1	scaffold_7	1647_1_CBOZ_CBPA	OstapCp46, OstapMp22, OstapMp42	OSTLU_13609	MICPUN_104717, mit47, mit5	MICPUCDRAFT_49458	VOLCADRAFT_83961
[KO:K02113]	3.6.3.14	F-type H+-transporting ATPase subunit delta	CHLREDRAFT_132678						jgi|ChlNC64A_1|37754|estExt_Genewise1Plus.C_2140003	scaffold_214	CBPS_CBWC_CBWF_1665_1		jgi|Coc_C169_1|38082|fgenesh1_pm.18_#_35	scaffold_18	4080_1_CBOZ_CBPA		OSTLU_32540	MICPUN_93509	MICPUCDRAFT_57603	VOLCADRAFT_77395
[KO:K02115]	3.6.3.14	F-type H+-transporting ATPase subunit gamma	CHLREDRAFT_134235		H632_c2161p0	contig-2161	a6364r480		jgi|ChlNC64A_1|52078|fgenesh3_pg.C_scaffold_9000103	scaffold_9	CBPS_CBWC_CBWF_1942_1		jgi|Coc_C169_1|55531|Genemark1.475_g	scaffold_1	1916_2_CBOZ_CBPA	Ot09g01120	OSTLU_24766	MICPUN_104789	MICPUCDRAFT_48500	VOLCADRAFT_102786
[KO:K02128]	3.6.3.14	F-type H+-transporting ATPase subunit c	CHLREDRAFT_195724, 195725				a37826r82									OstapMp03		MICPUN_mit60		VOLCADRAFT_83693
[KO:K02132]	3.6.3.14	F-type H+-transporting ATPase subunit alpha	CHLREDRAFT_76602		H632_c926p1	contig-926	a362160r13		jgi|ChlNC64A_1|144959|IGS.gm_8_00287	scaffold_14	CBPS_CBWC_CBWF_3408_0_CBWC386.b1		jgi|Coc_C169_1|2926|gw1.10.138.1	scaffold_10	1664_1_CBOZ_CBPA	OstapMp17		MICPUN_64171	MICPUCDRAFT_55960	VOLCADRAFT_107304
[KO:K02133]	3.6.3.14	F-type H+-transporting ATPase subunit beta	CHLREDRAFT_78348		H632_c240p0	contig-240	a708r1763		jgi|ChlNC64A_1|37451|estExt_Genewise1Plus.C_310027	scaffold_31	CBPS_CBWC_CBWF_284_2		jgi|Coc_C169_1|1776|gw1.19.65.1	scaffold_19	1571_1_CBOZ_CBPA	Ot02g00850	OSTLU_119590	MICPUN_107337	MICPUCDRAFT_49420	VOLCADRAFT_80433
[KO:K02134]	3.6.3.14	F-type H+-transporting ATPase subunit delta	CHLREDRAFT_185200		H632_c38p3	contig-38	a467r893		jgi|ChlNC64A_1|29233|estExt_Genewise1.C_10325	scaffold_1	CBPS_CBWC_CBWF_1842_1		jgi|Coc_C169_1|38232|fgenesh1_pm.19_#_54	scaffold_19	80_1_CBOZ_CBPA	Ot09g00570	OSTLU_35127	MICPUN_64063	MICPUCDRAFT_56087	VOLCADRAFT_109632
[KO:K02135]	3.6.3.14	F-type H+-transporting ATPase subunit epsilon	CHLREDRAFT_133544			contig-465	a5789r558		jgi|ChlNC64A_1|48298|fgenesh3_kg.C_scaffold_20000001	scaffold_20	CBPS_CBWC_CBWF_2769_1		jgi|Coc_C169_1|36432|fgenesh1_pm.7_#_48	scaffold_7	1276_1_CBOZ_CBPA	Ot07g02060	OSTLU_32630	MICPUN_56200	MICPUCDRAFT_57573	VOLCADRAFT_80163
[KO:K02136]	3.6.3.14	F-type H+-transporting ATPase subunit gamma	CHLREDRAFT_194183		H632_c2161p0	contig-2161	a6364r480		jgi|ChlNC64A_1|32096|estExt_Genewise1.C_170035	scaffold_17	CBPS_CBWC_CBWF_1543_1		jgi|Coc_C169_1|35818|fgenesh1_pm.4_#_220	scaffold_4	175_1_CBOZ_CBPA		OSTLU_29009	MICPUN_89673	MICPUCDRAFT_13754	VOLCADRAFT_76794
[KO:K02137]	3.6.3.14	F-type H+-transporting ATPase oligomycin sensitivity conferral protein	CHLREDRAFT_191596		H632_c2608p0				jgi|ChlNC64A_1|134814|IGS.gm_12_00200		CBPS_CBWC_CBWF_3573_0_CBWC6248.b1		jgi|Coc_C169_1|34812|fgenesh1_pm.1_#_153		896_1_CBOZ_CBPA		OSTLU_31663	MICPUN_81610		VOLCADRAFT_109721
[KO:K02144]	3.6.3.14	V-type H+-transporting ATPase 54 kD subunit	CHLREDRAFT_129048		H632_c4478p0	contig-4478	a22307r166		jgi|ChlNC64A_1|36583|estExt_Genewise1Plus.C_180222	scaffold_18	CBPS_CBWC_CBWF_3762_0_CBWF2201.b1		jgi|Coc_C169_1|3268|gw1.12.129.1	scaffold_12	3401_1_CBOZ_CBPA	Ot05g04010	OSTLU_9572	MICPUN_105296	MICPUCDRAFT_9416	VOLCADRAFT_83249
[KO:K02145]	3.6.3.14	V-type H+-transporting ATPase subunit A	CHLREDRAFT_54608		H632_c1210p0	contig-1210	a6026r636		jgi|ChlNC64A_1|56410|estExt_fgenesh3_pm.C_350008	scaffold_35	CBPS_CBWC_CBWF_753_1		jgi|Coc_C169_1|38331|fgenesh1_pm.20_#_23	scaffold_20	700_1_CBOZ_CBPA		OSTLU_50597	MICPUN_59806	MICPUCDRAFT_43849	VOLCADRAFT_74447
[KO:K02146]	3.6.3.14	V-type H+-transporting ATPase subunit AC39	CHLREDRAFT_135171		H632_c539p0	contig-539	a3125r392		jgi|ChlNC64A_1|54186|fgenesh3_pg.C_scaffold_20000059	scaffold_20	CBPS_CBWC_CBWF_4059_0_CBWF7912.b1		jgi|Coc_C169_1|35544|fgenesh1_pm.3_#_219	scaffold_3	2294_2_CBOZ_CBPA	Ot02g04450	OSTLU_119494	MICPUN_107367	MICPUCDRAFT_70803	VOLCADRAFT_72840
[KO:K02147]	3.6.3.14	V-type H+-transporting ATPase subunit B	CHLREDRAFT_126382		H632_c926p1	contig-926	a5847r468		jgi|ChlNC64A_1|56195|estExt_fgenesh3_pm.C_120034	scaffold_12	CBPS_CBWC_CBWF_797_1		jgi|Coc_C169_1|11578|e_gw1.1.272.1	scaffold_1	1424_2_CBOZ_CBPA	Ot10g00840	OSTLU_88387	MICPUN_55906	MICPUCDRAFT_45455	VOLCADRAFT_110003
[KO:K02148]	3.6.3.14	V-type H+-transporting ATPase subunit C	CHLREDRAFT_187322		H632_c3002p0	contig-3002	a17888r160		jgi|ChlNC64A_1|48910|fgenesh3_pm.C_scaffold_12000050	scaffold_12	CBPS_CBWC_CBWF_1552_2		jgi|Coc_C169_1|34822|fgenesh1_pm.1_#_163	scaffold_1	3234_1_CBOZ_CBPA	Ot07g04010	OSTLU_87859	MICPUN_60092	MICPUCDRAFT_12280	VOLCADRAFT_106399
[KO:K02149]	3.6.3.14	V-type H+-transporting ATPase subunit D	CHLREDRAFT_191863		H632_c3425p0	contig-3425	a7252r405		jgi|ChlNC64A_1|48301|fgenesh3_kg.C_scaffold_21000002	scaffold_21	CBPS_CBWC_CBWF_1581_1		jgi|Coc_C169_1|36580|fgenesh1_pm.7_#_196	scaffold_7	3636_1_CBOZ_CBPA	Ot11g02940	OSTLU_88668	MICPUN_72123	MICPUCDRAFT_6741	VOLCADRAFT_73085
[KO:K02150]	3.6.3.14	V-type H+-transporting ATPase subunit E	CHLREDRAFT_190371		H632_c717p1	contig-717	a8057r357		jgi|ChlNC64A_1|48992|fgenesh3_pm.C_scaffold_16000002	scaffold_16	CBPS_CBWC_CBWF_1901_1		jgi|Coc_C169_1|54403|estExt_fgenesh1_pm.C_160039	scaffold_16	1140_1_CBOZ_CBPA		OSTLU_7408	MICPUN_109459	MICPUCDRAFT_46655	VOLCADRAFT_75406
[KO:K02151]	3.6.3.14	V-type H+-transporting ATPase subunit F	CHLREDRAFT_182533		H632_c267p1	contig-267	a34312r117		jgi|ChlNC64A_1|48752|fgenesh3_pm.C_scaffold_8000023	scaffold_8			jgi|Coc_C169_1|9388|gw1.10.478.1	scaffold_10	0_0_CBOZ4085.b1_CBOZ_CBPA	Ot04g02910	OSTLU_15055	MICPUN_109147	MICPUCDRAFT_60175	VOLCADRAFT_104166
[KO:K02152]	3.6.3.14	V-type H+-transporting ATPase subunit G	CHLREDRAFT_59366		H632_c1250p0	contig-1788	a9101r872		jgi|ChlNC64A_1|51796|fgenesh3_pg.C_scaffold_8000083		CBPS_CBWC_CBWF_7_1		jgi|Coc_C169_1|36947|fgenesh1_pm.10_#_35	scaffold_10	577_1_CBOZ_CBPA		OSTLU_14631	MICPUN_57558
[KO:K02154]	3.6.3.14	V-type H+-transporting ATPase subunit I	CHLREDRAFT_115936, 131895, 438		H632_c1896p1	contig-1896	a5302r175		jgi|ChlNC64A_1|34870|estExt_Genewise1Plus.C_60138	scaffold_6	CBPS_CBWC_CBWF_2445_1, _2118_1		jgi|Coc_C169_1|15357|e_gw1.7.416.1, |36462|fgenesh1_pm.7_#_78	scaffold_7	3510_2_CBOZ_CBPA	Ot08g03920	OSTLU_46292	MICPUN_97767	MICPUCDRAFT_16972	VOLCADRAFT_79461
[KO:K02155]	3.6.3.14	V-type H+-transporting ATPase 16kDa proteolipid subunit	CHLREDRAFT_134189		H632_c53p3	contig-53	a5850r741		jgi|ChlNC64A_1|48782|fgenesh3_pm.C_scaffold_9000015	scaffold_9	CBPS_CBWC_CBWF_2959_1		jgi|Coc_C169_1|34865|fgenesh1_pm.1_#_206	scaffold_1	12_1_CBOZ_CBPA	Ot02g03720, Ot07g02040	OSTLU_119546, 35397	MICPUN_109221, 90064	MICPUCDRAFT_44231	VOLCADRAFT_107886
[KO:K02257]	2.5.1.-	protoheme IX farnesyltransferase	CHLREDRAFT_123320		H632_c249p2	contig-249	a17371r108		jgi|ChlNC64A_1|16826|gw1.11.387.1	scaffold_11			jgi|Coc_C169_1|4154|gw1.4.360.1	scaffold_4	2612_1_CBOZ_CBPA	Ot04g05160	OSTLU_87130	MICPUN_68841	MICPUCDRAFT_34718	VOLCADRAFT_79954
[KO:K02258]	---	cytochrome c oxidase assembly protein subunit 11	CHLREDRAFT_195707		H632_c1111p1	contig-1111	a34840r75		jgi|ChlNC64A_1|31752|estExt_Genewise1.C_140205	scaffold_14	CBPS_CBWC_CBWF_891_1		jgi|Coc_C169_1|17438|e_gw1.12.368.1	scaffold_12		Ot07g03140	OSTLU_7271	MICPUN_113808	MICPUCDRAFT_26394	VOLCADRAFT_80232
[KO:K02259]	---	cytochrome c oxidase assembly protein subunit 15	CHLREDRAFT_111563		H632_c70p2	contig-70	a39680r53		jgi|ChlNC64A_1|23720|e_gw1.11.94.1	scaffold_11			jgi|Coc_C169_1|5799|gw1.1.500.1	scaffold_1		Ot14g02350	OSTLU_43606	MICPUN_80958	MICPUCDRAFT_3013
[KO:K02260]	---	cytochrome c oxidase assembly protein subunit 17	CHLREDRAFT_154148			contig-490	a777r757		jgi|ChlNC64A_1|134707|IGS.gm_12_00093	scaffold_12			jgi|Coc_C169_1|15941|e_gw1.8.470.1				OSTLU_43298	MICPUN_89165	MICPUCDRAFT_9947	VOLCADRAFT_48953
[KO:K02261]	---	cytochrome c oxidase subunit 2	CHLREDRAFT_190125				a216391r14								127_1_CBOZ_CBPA	OstapMp32		MICPUN_mit21		VOLCADRAFT_80299
[KO:K02267]	---	cytochrome c oxidase subunit 6b	CHLREDRAFT_195712		H632_c798p1	contig-798	a4907r940		jgi|ChlNC64A_1|138605|IGS.gm_21_00084		CBPS_CBWC_CBWF_2438_1		jgi|Coc_C169_1|38057|fgenesh1_pm.18_#_10	scaffold_10	1043_1_CBOZ_CBPA	Ot17g01070	OSTLU_37791		MICPUCDRAFT_53846	VOLCADRAFT_48974
[KO:K03661]	3.6.3.14	V-type H+-transporting ATPase 21kDa proteolipid subunit	CHLREDRAFT_192558		H632_c1099p0	contig-1099	a15857r168		jgi|ChlNC64A_1|35078|estExt_Genewise1Plus.C_80079	scaffold_8	CBPS_CBWC_CBWF_3901_0_CBWF5343.b1		jgi|Coc_C169_1|8146|gw1.10.426.1	scaffold_10	445_1_CBOZ_CBPA	Ot01g02710	OSTLU_13768	MICPUN_58766	MICPUCDRAFT_52829	VOLCADRAFT_109870
[KO:K03880]	1.6.5.3	NADH-ubiquinone oxidoreductase chain 3	CHLREDRAFT_24195										jgi|Coc_C169_1|9991|gw1.40.9.1	scaffold_40		OstapMp16		MICPUN_mit79		VOLCADRAFT_82032
[KO:K03885]	1.6.99.3	NADH dehydrogenase	CHLREDRAFT_133334, 189359, 195711, 195719			contig-4622	a14100r142, a37826r82		jgi|ChlNC64A_1|53033|fgenesh3_pg.C_scaffold_13000139, |135776|IGS.gm_14_00309, |57310|estExt_fgenesh3_pg.C_50264, |140737|IGS.gm_3_00476	scaffold_27, 14, 5, 3	CBPS_CBWC_CBWF_1745_1, _933_1, _428_1, _3229_0_CBPS733.b1		jgi|Coc_C169_1|1183|gw1.19.49.1, |2979|gw1.2.248.1, |1969|gw1.10.80.1, |2876|gw1.6.131.1	scaffold_19, 2, 10, 6	29_1_, 2177_1_CBOZ_CBPA
[KO:K03934]	1.6.5.3; 1.6.99.3	NADH dehydrogenase (ubiquinone) Fe-S protein 1	CHLREDRAFT_79362		H632_c2514p0	contig-2514	a8517r220		jgi|ChlNC64A_1|21051|e_gw1.5.273.1	scaffold_5	CBPS_CBWC_CBWF_619_1		jgi|Coc_C169_1|18538|e_gw1.15.32.1	scaffold_15	0_0_CBOZ4742.b1_CBOZ_CBPA	Ot12g00450	OSTLU_39049	MICPUN_64564	MICPUCDRAFT_36280	VOLCADRAFT_75683
[KO:K03935]	1.6.5.3; 1.6.99.3	NADH dehydrogenase (ubiquinone) Fe-S protein 2	CHLREDRAFT_185013				a422495r11							scaffold_5		OstapMp15		MICPUN_mit76		VOLCADRAFT_84552
[KO:K03936]	1.6.5.3; 1.6.99.3	NADH dehydrogenase (ubiquinone) Fe-S protein 3	CHLREDRAFT_182980													OstapMp18		MICPUN_mit80		VOLCADRAFT_75676
[KO:K03937]	---	NADH dehydrogenase (ubiquinone) Fe-S protein 4	CHLREDRAFT_184606		H632_c211p1	contig-211	a18532r165		jgi|ChlNC64A_1|143905|IGS.gm_6_00479	scaffold_6	CBPS_CBWC_CBWF_0_0_CBWF1940.b1		jgi|Coc_C169_1|37287|fgenesh1_pm.12_#_30	scaffold_12	307_1_CBOZ_CBPA			MICPUN_102147	MICPUCDRAFT_59707	VOLCADRAFT_77953
[KO:K03938]	---	NADH dehydrogenase (ubiquinone) Fe-S protein 5	CHLREDRAFT_135635										jgi|Coc_C169_1|35411|fgenesh1_pm.3_#_86		382_1_CBOZ_CBPA		OSTLU_26714	MICPUN_59177	MICPUCDRAFT_60640
[KO:K03940]	1.6.5.3; 1.6.99.3	NADH dehydrogenase (ubiquinone) Fe-S protein 7	CHLREDRAFT_139850		H632_c796p1	contig-796	a16813r260		jgi|ChlNC64A_1|21383|e_gw1.5.386.1	scaffold_5			jgi|Coc_C169_1|35164|fgenesh1_pm.2_#_174	scaffold_2	2767_1_CBOZ_CBPA	OstapMp19				VOLCADRAFT_73712
[KO:K03941]	1.6.5.3; 1.6.99.3	NADH dehydrogenase (ubiquinone) Fe-S protein 8	CHLREDRAFT_132909		H632_c1223p0	contig-1223	a2180r1133		jgi|ChlNC64A_1|48147|fgenesh3_kg.C_scaffold_4000015	scaffold_4	CBPS_CBWC_CBWF_2568_1		jgi|Coc_C169_1|43036|fgenesh1_pg.11_#_244	scaffold_11			OSTLU_18502	MICPUN_109068	MICPUCDRAFT_45998	VOLCADRAFT_109652
[KO:K03942]	1.6.5.3; 1.6.99.3	NADH dehydrogenase (ubiquinone) flavoprotein 1	CHLREDRAFT_186342		H632_c908p0	contig-908	a5296r675		jgi|ChlNC64A_1|136092|IGS.gm_15_00188	scaffold_3	CBPS_CBWC_CBWF_2117_1		jgi|Coc_C169_1|35514|fgenesh1_pm.3_#_189	scaffold_3	2179_1_CBOZ_CBPA	Ot15g00500	OSTLU_43184	MICPUN_94594	MICPUCDRAFT_26689	VOLCADRAFT_58014
[KO:K03943]	1.6.5.3; 1.6.99.3	NADH dehydrogenase (ubiquinone) flavoprotein 2	CHLREDRAFT_127317		H632_c953p1	contig-953	a14444r220		jgi|ChlNC64A_1|48164|fgenesh3_kg.C_scaffold_5000008	scaffold_5	CBPS_CBWC_CBWF_1734_1		jgi|Coc_C169_1|30642|estExt_Genewise1Plus.C_150129	scaffold_15	2595_1_CBOZ_CBPA	Ot20g00430	OSTLU_7050	MICPUN_85881	MICPUCDRAFT_21836	VOLCADRAFT_120415
[KO:K03946]	---	NADH dehydrogenase (ubiquinone) 1 alpha subcomplex subunit 2	CHLREDRAFT_149240		H632_c906p1	contig-906	a24764r272		jgi|ChlNC64A_1|15255|gw1.13.222.1	scaffold_13	CBPS_CBWC_CBWF_0_0_CBPS1611.g1		jgi|Coc_C169_1|34749|fgenesh1_pm.1_#_90	scaffold_1	967_1_CBOZ_CBPA		OSTLU_27581	MICPUN_86475	MICPUCDRAFT_19041
[KO:K03949]	---	NADH dehydrogenase (ubiquinone) 1 alpha subcomplex subunit 5	CHLREDRAFT_127639						jgi|ChlNC64A_1|136424|IGS.gm_16_00147				jgi|Coc_C169_1|67500|estExt_Genemark1.C_160096			Ot08g03860	OSTLU_9445		MICPUCDRAFT_30126	VOLCADRAFT_74105
[KO:K03950]	---	NADH dehydrogenase (ubiquinone) 1 alpha subcomplex subunit 6	CHLREDRAFT_57090		H632_c261p0	contig-261	a5636r396		jgi|ChlNC64A_1|54254|fgenesh3_pg.C_scaffold_20000127	scaffold_20			jgi|Coc_C169_1|40238|fgenesh1_pg.3_#_299		631_1_CBOZ_CBPA		OSTLU_9210	MICPUN_106469	MICPUCDRAFT_35994	VOLCADRAFT_109314
[KO:K03952]	---	NADH dehydrogenase (ubiquinone) 1 alpha subcomplex subunit 8	CHLREDRAFT_59411				a7218r470		jgi|ChlNC64A_1|15054|gw1.12.438.1				jgi|Coc_C169_1|37176|fgenesh1_pm.11_#_73		3388_1_CBOZ_CBPA		OSTLU_34652	MICPUN_109502	MICPUCDRAFT_32079	VOLCADRAFT_79565
[KO:K03953]	---	NADH dehydrogenase (ubiquinone) 1 alpha subcomplex subunit 9	CHLREDRAFT_186185				a22242r124		jgi|ChlNC64A_1|48110|fgenesh3_kg.C_scaffold_3000006	scaffold_3	CBPS_CBWC_CBWF_1105_1		jgi|Coc_C169_1|35216|fgenesh1_pm.2_#_226	scaffold_2	2028_1_CBOZ_CBPA		OSTLU_26150	MICPUN_61040	MICPUCDRAFT_27758	VOLCADRAFT_106450
[KO:K03955]	---	NADH dehydrogenase (ubiquinone) 1 alpha/beta subcomplex 1	CHLREDRAFT_132151		H632_c3283p0	contig-3283	a1251r2714		jgi|ChlNC64A_1|48512|fgenesh3_pm.C_scaffold_3000012	scaffold_3	CBPS_CBWC_CBWF_1961_1		jgi|Coc_C169_1|37259|fgenesh1_pm.12_#_2	scaffold_12	92_1_CBOZ_CBPA	Ot18g01530	OSTLU_42161	MICPUN_57396	MICPUCDRAFT_23642	VOLCADRAFT_105506
[KO:K03963]	---	NADH dehydrogenase (ubiquinone) 1 beta subcomplex subunit 7	CHLREDRAFT_164272			contig-210	a17982r147		jgi|ChlNC64A_1|58840|estExt_fgenesh3_pg.C_220003		CBPS_CBWC_CBWF_3950_1		jgi|Coc_C169_1|36072|fgenesh1_pm.5_#_171	scaffold_5	1804_1_CBOZ_CBPA		OSTLU_29176	MICPUN_64887	MICPUCDRAFT_29495	VOLCADRAFT_120235
[KO:K03965]	---	NADH dehydrogenase (ubiquinone) 1 beta subcomplex subunit 9	CHLREDRAFT_164424		H632_c2416p0								jgi|Coc_C169_1|36863|fgenesh1_pm.9_#_120		980_1_CBOZ_CBPA			MICPUN_59784	MICPUCDRAFT_12445	VOLCADRAFT_99267
[KO:K11352]	---	NADH dehydrogenase (ubiquinone) 1 alpha subcomplex subunit 12	CHLREDRAFT_193762		H632_c636p2	contig-636	a8953r354		jgi|ChlNC64A_1|137369|IGS.gm_19_00136		CBPS_CBWC_CBWF_2186_1		jgi|Coc_C169_1|53665|estExt_fgenesh1_pm.C_90117		5241_1_CBOZ_CBPA			MICPUN_88622
[KO:K11353]	---	NADH dehydrogenase (ubiquinone) 1 alpha subcomplex subunit 13	CHLREDRAFT_194458				a5300r423		jgi|ChlNC64A_1|14259|gw1.1.533.1	scaffold_1	CBPS_CBWC_CBWF_151_1		jgi|Coc_C169_1|10867|gw1.15.297.1	scaffold_15	2726_1_CBOZ_CBPA	Ot08g00590	OSTLU_16353	MICPUN_59676	MICPUCDRAFT_26677	VOLCADRAFT_78207
00195_Photosynthesis
[KO:K02109]	3.6.3.14	F-type H+-transporting ATPase subunit b	CHLREDRAFT_206190						jgi|ChlNC64A_1|54731|fgenesh3_pg.C_scaffold_25000006	scaffold_25	CBPS_CBWC_CBWF_2606_1		jgi|Coc_C169_1|15356|e_gw1.7.340.1	scaffold_7	1647_1_CBOZ_CBPA	OstapCp46, OstapMp22, OstapMp42	OSTLU_13609	MICPUN_104717, mit47, mit5	MICPUCDRAFT_49458	VOLCADRAFT_83961
[KO:K02113]	3.6.3.14	F-type H+-transporting ATPase subunit delta	CHLREDRAFT_132678						jgi|ChlNC64A_1|37754|estExt_Genewise1Plus.C_2140003	scaffold_214	CBPS_CBWC_CBWF_1665_1		jgi|Coc_C169_1|38082|fgenesh1_pm.18_#_35	scaffold_18	4080_1_CBOZ_CBPA		OSTLU_32540	MICPUN_93509	MICPUCDRAFT_57603	VOLCADRAFT_77395
[KO:K02115]	3.6.3.14	F-type H+-transporting ATPase subunit gamma	CHLREDRAFT_134235		H632_c2161p0	contig-2161	a6364r480		jgi|ChlNC64A_1|52078|fgenesh3_pg.C_scaffold_9000103	scaffold_9	CBPS_CBWC_CBWF_1942_1		jgi|Coc_C169_1|55531|Genemark1.475_g	scaffold_1	1916_2_CBOZ_CBPA	Ot09g01120	OSTLU_24766	MICPUN_104789	MICPUCDRAFT_48500	VOLCADRAFT_102786
[KO:K02636]	1.10.9.1	cytochrome b6-f complex iron-sulfur subunit	CHLREDRAFT_193296			contig-39	a10004r399		jgi|ChlNC64A_1|13238|gw1.7.176.1	scaffold_7	CBPS_CBWC_CBWF_2953_1		jgi|Coc_C169_1|35376|fgenesh1_pm.3_#_51	scaffold_3	840_1_CBOZ_CBPA		OSTLU_40083	MICPUN_88922	MICPUCDRAFT_36185	VOLCADRAFT_109628
[KO:K02638]	---	plastocyanin	CHLREDRAFT_185915						jgi|ChlNC64A_1|59755|estExt_fgenesh3_kg.C_200002	scaffold_20	CBPS_CBWC_CBWF_8_7		jgi|Coc_C169_1|38635|fgenesh1_pm.24_#_4	scaffold_24	229_1_CBOZ_CBPA	Ot09g04190	OSTLU_34733	MICPUN_60322	MICPUCDRAFT_59039	VOLCADRAFT_72905, 79339
[KO:K02639]	---	ferredoxin	CHLREDRAFT_147787, 196705, 196707		H632_c100p2	contig-100	a13544r314		jgi|ChlNC64A_1|138861|IGS.gm_22_00102, |144299|IGS.gm_7_00241, |145238|IGS.gm_9_00045	scaffold_22, 7, 9	CBPS_CBWC_CBWF_3054_1, _0_0_CBWC6412.b1		jgi|Coc_C169_1|37753|fgenesh1_pm.15_#_29, |6638|gw1.15.158.1, |8473|gw1.1.726.1	scaffold_15, 12, 1	623_1_CBOZ_CBPA	Ot06g01530, Ot06g03460, Ot18g00960	OSTLU_10664, 37765, 8944, 9385	MICPUN_104777, 108124, 61126, 96644	MICPUCDRAFT_27711, 30100, 37020, 58790	VOLCADRAFT_110096, 74853, 81803, 86991
[KO:K02641]	1.18.1.2	ferredoxin--NADP+ reductase	CHLREDRAFT_195553		H632_c449p0	contig-449	a58908r51		jgi|ChlNC64A_1|35036|estExt_Genewise1Plus.C_70329	scaffold_7	CBPS_CBWC_CBWF_3147_1		jgi|Coc_C169_1|38079|fgenesh1_pm.18_#_32	scaffold_18	817_2_CBOZ_CBPA	Ot18g01390	OSTLU_28333	MICPUN_106827	MICPUCDRAFT_54402	VOLCADRAFT_106598
[KO:K02692]	---	photosystem I subunit II	CHLREDRAFT_184971						jgi|ChlNC64A_1|35550|estExt_Genewise1Plus.C_110128	scaffold_11	CBPS_CBWC_CBWF_0_0_CBPS1854.g1		jgi|Coc_C169_1|37098|fgenesh1_pm.10_#_186	scaffold_10	252_1_CBOZ_CBPA		OSTLU_51423	MICPUN_84657	MICPUCDRAFT_36482	VOLCADRAFT_121148
[KO:K02693]	---	photosystem I subunit IV	CHLREDRAFT_76146						jgi|ChlNC64A_1|59766|estExt_fgenesh3_kg.C_230007	scaffold_23	CBPS_CBWC_CBWF_563_1		jgi|Coc_C169_1|37773|fgenesh1_pm.15_#_49	scaffold_15	3770_1_CBOZ_CBPA	Ot02g06250	OSTLU_119378	MICPUN_90731	MICPUCDRAFT_32586	VOLCADRAFT_108984
[KO:K02694]	---	photosystem I subunit III	CHLREDRAFT_130914						jgi|ChlNC64A_1|20151|e_gw1.3.399.1	scaffold_3	CBPS_CBWC_CBWF_609_1		jgi|Coc_C169_1|12433|e_gw1.2.624.1	scaffold_2	2005_1_CBOZ_CBPA	Ot04g01880	OSTLU_31108	MICPUN_90596	MICPUCDRAFT_26202	VOLCADRAFT_81870
[KO:K02695]	---	photosystem I subunit VI	CHLREDRAFT_182959						jgi|ChlNC64A_1|140851|IGS.gm_3_00590				jgi|Coc_C169_1|36067|fgenesh1_pm.5_#_166	scaffold_5	793_1_CBOZ_CBPA	Ot15g00990	OSTLU_27383	MICPUN_58213	MICPUCDRAFT_70928	VOLCADRAFT_83838
[KO:K02696]	---	photosystem I subunit VIII	CHLREDRAFT_144056													OstapCp52				VOLCADRAFT_105181
[KO:K02698]	---	photosystem I subunit X	CHLREDRAFT_192478						jgi|ChlNC64A_1|136967|IGS.gm_18_00073	scaffold_18			jgi|Coc_C169_1|33672|fgenesh1_kg.12_#_39_#_2074_1_CBOZ_CBPA		2074_1_CBOZ_CBPA		OSTLU_37677	MICPUN_62137	MICPUCDRAFT_53824	VOLCADRAFT_109536
[KO:K02699]	---	photosystem I subunit XI	CHLREDRAFT_205935						jgi|ChlNC64A_1|37123|estExt_Genewise1Plus.C_250119	scaffold_25	CBPS_CBWC_CBWF_8_85		jgi|Coc_C169_1|35565|fgenesh1_pm.3_#_240	scaffold_3	998_1_CBOZ_CBPA	Ot02g00810	OSTLU_119502	MICPUN_95054	MICPUCDRAFT_47719	VOLCADRAFT_80111
[KO:K02701]	---	photosystem I subunit PsaN	CHLREDRAFT_186531						jgi|ChlNC64A_1|36789|estExt_Genewise1Plus.C_210135	scaffold_21	CBPS_CBWC_CBWF_2669_1					Ot06g00290	OSTLU_31962	MICPUN_93625	MICPUCDRAFT_58597	VOLCADRAFT_109887
[KO:K02716]	---	photosystem II oxygen-evolving enhancer protein 1	CHLREDRAFT_130316						jgi|ChlNC64A_1|59103|estExt_fgenesh3_pg.C_260029	scaffold_26	CBPS_CBWC_CBWF_8_46		jgi|Coc_C169_1|19174|e_gw1.17.131.1	scaffold_17	3755_1_CBOZ_CBPA	Ot14g00200	OSTLU_29311	MICPUN_92317	MICPUCDRAFT_48994	VOLCADRAFT_83003
[KO:K02717]	---	photosystem II oxygen-evolving enhancer protein 2	CHLREDRAFT_183033, 33411						jgi|ChlNC64A_1|145009|IGS.gm_8_00337, |36980|estExt_Genewise1Plus.C_240105	scaffold_8, 24	CBPS_CBWC_CBWF_381_1		jgi|Coc_C169_1|35280|fgenesh1_pm.2_#_290, |35614|fgenesh1_pm.4_#_16	scaffold_2, 4	341_1_CBOZ_CBPA	Ot07g02230	OSTLU_118778, 48109	MICPUN_104990, 107741	MICPUCDRAFT_34167, 57449
[KO:K02721]	---	photosystem II PsbW protein	CHLREDRAFT_155150						jgi|ChlNC64A_1|134804|IGS.gm_12_00190	scaffold_12			jgi|Coc_C169_1|37211|fgenesh1_pm.11_#_108	scaffold_11	558_2_CBOZ_CBPA	Ot02g04370	OSTLU_119497	MICPUN_106364	MICPUCDRAFT_51380	VOLCADRAFT_106616
[KO:K02723]	---	photosystem II PsbY protein	CHLREDRAFT_182560, 205530						jgi|ChlNC64A_1|134219|IGS.gm_11_00065	scaffold_11	CBPS_CBWC_CBWF_813_1		jgi|Coc_C169_1|34758|fgenesh1_pm.1_#_99	scaffold_1	2192_1_CBOZ_CBPA	Ot12g00530	OSTLU_26717	MICPUN_112658	MICPUCDRAFT_63313	VOLCADRAFT_103469, 108813
[KO:K03541]	---	photosystem II 10kDa protein	CHLREDRAFT_98021						jgi|ChlNC64A_1|35273|estExt_Genewise1Plus.C_90154	scaffold_9	CBPS_CBWC_CBWF_337_1		jgi|Coc_C169_1|34964|fgenesh1_pm.1_#_305	scaffold_1	108_1_CBOZ_CBPA		OSTLU_31905	MICPUN_61954	MICPUCDRAFT_56305	VOLCADRAFT_109549
[KO:K03542]	---	photosystem II 22kDa protein	CHLREDRAFT_171516, 196341						jgi|ChlNC64A_1|140514|IGS.gm_3_00253	scaffold_3			jgi|Coc_C169_1|44485|fgenesh1_pg.18_#_87	scaffold_18	2139_1_CBOZ_CBPA	Ot06g04910	OSTLU_15953	MICPUN_108747	MICPUCDRAFT_51750	VOLCADRAFT_83375
[KO:K03689]	---	cytochrome b6-f complex subunit 8	CHLREDRAFT_177155						jgi|ChlNC64A_1|137456|IGS.gm_19_00223	scaffold_19			jgi|Coc_C169_1|35630|fgenesh1_pm.4_#_32	scaffold_4	535_1_CBOZ_CBPA		OSTLU_26720	MICPUN_94459	MICPUCDRAFT_63318	VOLCADRAFT_105437
[KO:K08901]	---	photosystem II oxygen-evolving enhancer protein 3	CHLREDRAFT_153656						jgi|ChlNC64A_1|141328|IGS.gm_33_00038	scaffold_33	CBPS_CBWC_CBWF_863_1		jgi|Coc_C169_1|35429|fgenesh1_pm.3_#_104	scaffold_3	0_0_CBPA1738.b1_CBOZ_CBPA	Ot16g01660	OSTLU_27803	MICPUN_106554	MICPUCDRAFT_49738	VOLCADRAFT_79577
[KO:K08902]	---	photosystem II Psb27 protein	CHLREDRAFT_187371						jgi|ChlNC64A_1|54729|fgenesh3_pg.C_scaffold_25000004	scaffold_25	CBPS_CBWC_CBWF_2396_1		jgi|Coc_C169_1|45115|fgenesh1_pg.21_#_140	scaffold_21	3524_1_CBOZ_CBPA		OSTLU_33201	MICPUN_91519	MICPUCDRAFT_16834	VOLCADRAFT_107104
[KO:K08903]	---	photosystem II 13kDa protein	CHLREDRAFT_182896						jgi|ChlNC64A_1|17638|gw1.3.778.1	scaffold_3			jgi|Coc_C169_1|27070|estExt_Genewise1Plus.C_20284	scaffold_2	712_1_CBOZ_CBPA	Ot16g00640	OSTLU_40772	MICPUN_82984	MICPUCDRAFT_19538
[KO:K08905]	---	photosystem I subunit V	CHLREDRAFT_165416						jgi|ChlNC64A_1|135670|IGS.gm_14_00203	scaffold_14	CBPS_CBWC_CBWF_2530_1		jgi|Coc_C169_1|66987|estExt_Genemark1.C_120319		1671_1_CBOZ_CBPA	Ot05g00810	OSTLU_31549	MICPUN_93147	MICPUCDRAFT_52059	VOLCADRAFT_120759
[KO:K08906]	---	cytochrome c6	CHLREDRAFT_145657						jgi|ChlNC64A_1|25146|e_gw1.14.493.1					scaffold_10	601_1_CBOZ_CBPA	Ot17g01130	OSTLU_9790	MICPUN_104960	MICPUCDRAFT_53843	VOLCADRAFT_121636
[KO:K14332]	---	photosystem I subunit PsaO	CHLREDRAFT_193847						jgi|ChlNC64A_1|136373|IGS.gm_16_00096	scaffold_16			jgi|Coc_C169_1|36846|fgenesh1_pm.9_#_103	scaffold_9	3600_1_CBOZ_CBPA	Ot02g07540	OSTLU_14386	MICPUN_112733	MICPUCDRAFT_64557	VOLCADRAFT_120934
00196_Photosynthesis_antenna_proteins
[KO:K08907]	---	light-harvesting complex I chlorophyll a/b binding protein 1	CHLREDRAFT_184471, 184730, 184731						jgi|ChlNC64A_1|48901|fgenesh3_pm.C_scaffold_12000041, |145148|IGS.gm_8_00476	scaffold_24, 8	CBPS_CBWC_CBWF_8_83, _8_48		jgi|Coc_C169_1|37784|fgenesh1_pm.15_#_60, |62951|Genemark1.3734_g	scaffold_15, 7	1107_1_, 1609_1_CBOZ_CBPA	Ot02g07190		MICPUN_104693		VOLCADRAFT_77985
[KO:K08908]	---	light-harvesting complex I chlorophyll a/b binding protein 2	CHLREDRAFT_168073						jgi|ChlNC64A_1|48556|fgenesh3_pm.C_scaffold_3000056	scaffold_24	CBPS_CBWC_CBWF_762_1		jgi|Coc_C169_1|35115|fgenesh1_pm.2_#_125	scaffold_2	3731_1_CBOZ_CBPA	Ot02g05720, Ot09g04370	OSTLU_33699	MICPUN_104964, 54950	MICPUCDRAFT_70884	VOLCADRAFT_103468
[KO:K08909]	---	light-harvesting complex I chlorophyll a/b binding protein 3	CHLREDRAFT_153678						jgi|ChlNC64A_1|48291|fgenesh3_kg.C_scaffold_19000003	scaffold_24	CBPS_CBWC_CBWF_814_1		jgi|Coc_C169_1|37969|fgenesh1_pm.16_#_134	scaffold_16	1348_1_CBOZ_CBPA	Ot18g01370	OSTLU_47897	MICPUN_90394	MICPUCDRAFT_46049	VOLCADRAFT_110044
[KO:K08910]	---	light-harvesting complex I chlorophyll a/b binding protein 4	CHLREDRAFT_186299, 192961						jgi|ChlNC64A_1|37035|estExt_Genewise1Plus.C_240194, |48128|fgenesh3_kg.C_scaffold_3000024	scaffold_24	CBPS_CBWC_CBWF_1032_1, _762_1		jgi|Coc_C169_1|40366|fgenesh1_pg.4_#_15, |35114|fgenesh1_pm.2_#_124	scaffold_2	3731_1_CBOZ_CBPA		OSTLU_24045			VOLCADRAFT_106964, 108856
[KO:K08911]	---	light-harvesting complex I chlorophyll a/b binding protein 5	CHLREDRAFT_136294, 183363, 187025						jgi|ChlNC64A_1|35939|estExt_Genewise1Plus.C_130159, |12078|gw1.5.330.1, |48643|fgenesh3_pm.C_scaffold_5000030	scaffold_13, 24	CBPS_CBWC_CBWF_8_49, _1727_1		jgi|Coc_C169_1|44136|fgenesh1_pg.16_#_115, |37783|fgenesh1_pm.15_#_59, |37785|fgenesh1_pm.15_#_61	scaffold_16, 15	1348_1_, 1910_1_CBOZ_CBPA	Ot05g03910	OSTLU_31850	MICPUN_104821	MICPUCDRAFT_49623	VOLCADRAFT_104631, 108852, 77575
[KO:K08912]	---	light-harvesting complex II chlorophyll a/b binding protein 1	CHLREDRAFT_184479, 184490, 184775, 191690, 195162, 205752						jgi|ChlNC64A_1|56227|estExt_fgenesh3_pm.C_140028, |48253|fgenesh3_kg.C_scaffold_14000005, |48957|fgenesh3_pm.C_scaffold_14000031	scaffold_24	CBPS_CBWC_CBWF_8_27		jgi|Coc_C169_1|35247|fgenesh1_pm.2_#_257, |35121|fgenesh1_pm.2_#_131	scaffold_2	1292_1_CBOZ_CBPA					VOLCADRAFT_108699, 110088, 78398
[KO:K08913]	---	light-harvesting complex II chlorophyll a/b binding protein 2	CHLREDRAFT_184067, 184071, 185533						jgi|ChlNC64A_1|56227|estExt_fgenesh3_pm.C_140028, |48957|fgenesh3_pm.C_scaffold_14000031	scaffold_24	CBPS_CBWC_CBWF_8_48, _8_27		jgi|Coc_C169_1|35274|fgenesh1_pm.2_#_284, |35121|fgenesh1_pm.2_#_131	scaffold_2	251_1_, 1292_1_CBOZ_CBPA					VOLCADRAFT_73821, 77072, 81675
[KO:K08915]	---	light-harvesting complex II chlorophyll a/b binding protein 4	CHLREDRAFT_184810						jgi|ChlNC64A_1|11351|gw1.17.101.1	scaffold_17	CBPS_CBWC_CBWF_111_1		jgi|Coc_C169_1|37418|fgenesh1_pm.12_#_161	scaffold_12	1578_1_CBOZ_CBPA	Ot16g02550	OSTLU_27891	MICPUN_92498	MICPUCDRAFT_70908	VOLCADRAFT_105072
[KO:K08916]	---	light-harvesting complex II chlorophyll a/b binding protein 5	CHLREDRAFT_184397						jgi|ChlNC64A_1|52820|fgenesh3_pg.C_scaffold_12000145	scaffold_12	CBPS_CBWC_CBWF_8_74		jgi|Coc_C169_1|34778|fgenesh1_pm.1_#_119	scaffold_1	4150_1_CBOZ_CBPA	Ot14g01370	OSTLU_29411	MICPUN_95759	MICPUCDRAFT_36592	VOLCADRAFT_104309
[KO:K14172]	---	light-harvesting complex II chlorophyll a/b binding protein 7	CHLREDRAFT_205903						jgi|ChlNC64A_1|17090|gw1.4.585.1	scaffold_24	CBPS_CBWC_CBWF_2409_1		jgi|Coc_C169_1|32633|fgenesh1_kg.4_#_108_#_2716_1_CBOZ_CBPA	scaffold_4	2716_1_CBOZ_CBPA	Ot11g01060	OSTLU_88576	MICPUN_82194	MICPUCDRAFT_70906	VOLCADRAFT_66679
00230_Purine_metabolism
[KO:K00088]	1.1.1.205	IMP dehydrogenase	CHLREDRAFT_193467		H632_c3786p0	contig-3786	a11667r315		jgi|ChlNC64A_1|138255|IGS.gm_20_00004	scaffold_20			jgi|Coc_C169_1|35415|fgenesh1_pm.3_#_90	scaffold_3	4430_0_CBOZ1296.b1_CBOZ_CBPA	Ot02g01560	OSTLU_119530	MICPUN_107152	MICPUCDRAFT_27930	VOLCADRAFT_55531
[KO:K00106]	1.17.1.4; 1.17.3.2	xanthine dehydrogenase/oxidase	CHLREDRAFT_117669		H632_c1184p1	contig-1184	a14722r150		jgi|ChlNC64A_1|53854|fgenesh3_pg.C_scaffold_18000044	scaffold_18	CBPS_CBWC_CBWF_1346_1		jgi|Coc_C169_1|37297|fgenesh1_pm.12_#_40	scaffold_12	2067_1_CBOZ_CBPA			MICPUN_83794		VOLCADRAFT_63971
[KO:K00365]	1.7.3.3	urate oxidase	CHLREDRAFT_183011		H632_c53p1	contig-53	a7255r282		jgi|ChlNC64A_1|10922|gw1.3.304.1	scaffold_3	CBPS_CBWC_CBWF_2073_1		jgi|Coc_C169_1|35139|fgenesh1_pm.2_#_149	scaffold_2	106_1_CBOZ_CBPA			MICPUN_64532		VOLCADRAFT_73602
[KO:K00601]	2.1.2.2	phosphoribosylglycinamide formyltransferase	CHLREDRAFT_117678			contig-1151	a128013r32		jgi|ChlNC64A_1|132916|IGS.gm_1_00052	scaffold_1	CBPS_CBWC_CBWF_1096_1		jgi|Coc_C169_1|7958|gw1.7.336.1	scaffold_7	521_1_CBOZ_CBPA		OSTLU_6266	MICPUN_55714	MICPUCDRAFT_51596	VOLCADRAFT_66954
[KO:K00602]	2.1.2.3; 3.5.4.10	phosphoribosylaminoimidazolecarboxamide formyltransferase / IMP cyclohydrolase	CHLREDRAFT_116979		H632_c967p0	contig-967	a33945r150		jgi|ChlNC64A_1|48916|fgenesh3_pm.C_scaffold_13000006	scaffold_13			jgi|Coc_C169_1|36335|fgenesh1_pm.6_#_183	scaffold_6		Ot01g06240	OSTLU_14033	MICPUN_102516	MICPUCDRAFT_52529	VOLCADRAFT_74797
[KO:K00759]	2.4.2.7	adenine phosphoribosyltransferase	CHLREDRAFT_145209			contig-3087	a95317r47		jgi|ChlNC64A_1|27518|e_gw1.26.248.1	scaffold_26			jgi|Coc_C169_1|10790|gw1.3.663.1	scaffold_3	2209_1_CBOZ_CBPA		OSTLU_26413	MICPUN_98140	MICPUCDRAFT_51070	VOLCADRAFT_104397
[KO:K00764]	2.4.2.14	amidophosphoribosyltransferase	CHLREDRAFT_122298		H632_c836p2	contig-836	a15216r89		jgi|ChlNC64A_1|7488|gw1.2.54.1	scaffold_2	CBPS_CBWC_CBWF_643_1		jgi|Coc_C169_1|1875|gw1.2.163.1	scaffold_2	4154_1_CBOZ_CBPA	Ot12g00210	OSTLU_19754	MICPUN_109142	MICPUCDRAFT_27999	VOLCADRAFT_120418
[KO:K00856]	2.7.1.20	adenosine kinase	CHLREDRAFT_190547		H632_c782p1	contig-782	a7238r207		jgi|ChlNC64A_1|49022|fgenesh3_pm.C_scaffold_18000005	scaffold_18	CBPS_CBWC_CBWF_2237_1		jgi|Coc_C169_1|43146|fgenesh1_pg.12_#_85	scaffold_12	591_1_CBOZ_CBPA	Ot10g03490	OSTLU_50659	MICPUN_59820	MICPUCDRAFT_43846	VOLCADRAFT_81030
[KO:K00860]	2.7.1.25	adenylylsulfate kinase	CHLREDRAFT_184419		H632_c120p1	contig-120	a5625r240		jgi|ChlNC64A_1|59439|estExt_fgenesh3_pg.C_420006	scaffold_31	CBPS_CBWC_CBWF_1844_1		jgi|Coc_C169_1|34996|fgenesh1_pm.2_#_6	scaffold_2	365_1_CBOZ_CBPA	Ot09g03000	OSTLU_19676	MICPUN_54830	MICPUCDRAFT_49355
[KO:K00873]	2.7.1.40	pyruvate kinase	CHLREDRAFT_118203, 136854, 196263		H632_c144p1, c1108p1	contig-144, 1108	a3345r247		jgi|ChlNC64A_1|34881|estExt_Genewise1Plus.C_60179, |16416|gw1.4.521.1	scaffold_18, 10	CBPS_CBWC_CBWF_348_2, _1822_2		jgi|Coc_C169_1|36469|fgenesh1_pm.7_#_85, |37635|fgenesh1_pm.14_#_69	scaffold_7, 14	3013_1_CBOZ_CBPA	Ot16g00440, Ot16g00530	OSTLU_27708, 40662	MICPUN_100158, 104841, 112645, 56945, 82586, 93072	MICPUCDRAFT_16253, 19660, 48021, 49534, 49922, 64256	VOLCADRAFT_68572, 82954, 84504
[KO:K00939]	2.7.4.3	adenylate kinase	CHLREDRAFT_118113, 129362, 133184, 194134		H632_c479p0, c3044p0, c488p0	contig-479, 3044, 488	a7464r361, a22569r203, a37019r71, a38402r114		jgi|ChlNC64A_1|36185|estExt_Genewise1Plus.C_140440, |141713|IGS.gm_37_00054, |17383|gw1.14.461.1, |48333|fgenesh3_kg.C_scaffold_26000010	scaffold_14, 37, 26	CBPS_CBWC_CBWF_2342_1, _3958_0_CBWF6227.b1		jgi|Coc_C169_1|37170|fgenesh1_pm.11_#_67, |8135|gw1.12.393.1, |17923|e_gw1.13.190.1, |7214|gw1.2.572.1	scaffold_11, 12, 13, 2	3126_1_, 3904_1_, 1257_1_CBOZ_CBPA	Ot05g00550, Ot08g00080, Ot09g02390	OSTLU_12518, 37399, 87896, 88233	MICPUN_100607, 108164, 86671, 91735	MICPUCDRAFT_17674, 19341, 32766	VOLCADRAFT_107429, 108787, 121426, 63144, 63227, 89730
[KO:K00940]	2.7.4.6	nucleoside-diphosphate kinase	CHLREDRAFT_180172, 180221, 58944		H632_c3233p0, c3486p0	contig-3233	a6009r415, a27379r130		jgi|ChlNC64A_1|137577|IGS.gm_2_00044, |13616|gw1.3.465.1, |48171|fgenesh3_kg.C_scaffold_5000015	scaffold_2, 5	CBPS_CBWC_CBWF_1823_1		jgi|Coc_C169_1|37329|fgenesh1_pm.12_#_72, |38133|fgenesh1_pm.18_#_86	scaffold_12	1507_1_, 433_1_CBOZ_CBPA	Ot11g02680, Ot15g00140	OSTLU_26583, 26635, 27292	MICPUN_88956, 92159, 98189	MICPUCDRAFT_20218, 35405, 60912	VOLCADRAFT_106657, 79018, 81768
[KO:K00942]	2.7.4.8	guanylate kinase	CHLREDRAFT_103296, 111725, 174270		H632_c1374p0, c3757p0	contig-3757, 1374	a38423r58, a5863r273		jgi|ChlNC64A_1|11310|gw1.20.93.1, |13106|gw1.20.130.1, |26494|e_gw1.20.93.1	scaffold_20	CBPS_CBWC_CBWF_817_1		jgi|Coc_C169_1|7835|gw1.3.459.1, |47593|estExt_fgenesh1_pg.C_90008, |7835|gw1.3.459.1	scaffold_3, 9	3451_1_CBOZ_CBPA, 4258_0_CBOZ7494.g1_CBOZ_CBPA	Ot12g01990	OSTLU_17617	MICPUN_71493, 86605	MICPUCDRAFT_7683	VOLCADRAFT_45159, 48884
[KO:K00948]	2.7.6.1	ribose-phosphate pyrophosphokinase	CHLREDRAFT_137493		H632_c1711p1	contig-1711	a18397r170		jgi|ChlNC64A_1|134289|IGS.gm_11_00135	scaffold_11	CBPS_CBWC_CBWF_867_1		jgi|Coc_C169_1|17124|e_gw1.11.149.1	scaffold_11				MICPUN_83316	MICPUCDRAFT_13173	VOLCADRAFT_82029
[KO:K00958]	2.7.7.4	sulfate adenylyltransferase	CHLREDRAFT_133924, 196910		H632_c211p2	contig-211	a9784r152		jgi|ChlNC64A_1|145209|IGS.gm_9_00016, |21820|e_gw1.6.73.1	scaffold_9			jgi|Coc_C169_1|56657|Genemark1.5686_g	scaffold_12	723_0_CBOZ2461.g1_CBOZ_CBPA	Ot10g00290	OSTLU_37879	MICPUN_97880	MICPUCDRAFT_30508	VOLCADRAFT_81084, 90775
[KO:K00962]	2.7.7.8	polyribonucleotide nucleotidyltransferase	CHLREDRAFT_193253				a59234r33		jgi|ChlNC64A_1|36088|estExt_Genewise1Plus.C_140272	scaffold_14	CBPS_CBWC_CBWF_3514_0_CBWC5400.b1		jgi|Coc_C169_1|769|gw1.16.10.1	scaffold_16		Ot02g05570, Ot03g00740	OSTLU_12216, 34347	MICPUN_79594, 88427	MICPUCDRAFT_31304, 52438	VOLCADRAFT_107702
[KO:K01120]	3.1.4.17	3',5'-cyclic-nucleotide phosphodiesterase	CHLREDRAFT_101278, 121190		H632_c1383p0	contig-1869	a45833r61		jgi|ChlNC64A_1|50560|fgenesh3_pg.C_scaffold_4000059	scaffold_4	CBPS_CBWC_CBWF_3953_0_CBWF6183.g1		jgi|Coc_C169_1|5325|gw1.20.136.1, |61372|Genemark1.2162_g	scaffold_20, 10			OSTLU_34350	MICPUN_99073	MICPUCDRAFT_12259, 4565	VOLCADRAFT_75153, 80002
[KO:K01466]	3.5.2.5	allantoinase	CHLREDRAFT_190406		H632_c3822p0	contig-3822	a26930r63		jgi|ChlNC64A_1|135520|IGS.gm_14_00053	scaffold_14	CBPS_CBWC_CBWF_2247_1		jgi|Coc_C169_1|28751|estExt_Genewise1Plus.C_60462	scaffold_6	2782_1_CBOZ_CBPA			MICPUN_97103		VOLCADRAFT_61422
[KO:K01487]	3.5.4.3	guanine deaminase	CHLREDRAFT_57990						jgi|ChlNC64A_1|133958|IGS.gm_10_00249	scaffold_10			jgi|Coc_C169_1|18815|e_gw1.16.74.1	scaffold_16	4476_0_CBOZ1812.b1_CBOZ_CBPA					VOLCADRAFT_65103, 82906
[KO:K01488]	3.5.4.4	adenosine deaminase	CHLREDRAFT_175699		H632_c1187p1	contig-1187	a18992r109		jgi|ChlNC64A_1|143540|IGS.gm_6_00114	scaffold_6			jgi|Coc_C169_1|3946|gw1.3.218.1	scaffold_3	3432_1_CBOZ_CBPA	Ot06g03230	OSTLU_5107	MICPUN_69678		VOLCADRAFT_64498
[KO:K01490]	3.5.4.6	AMP deaminase	CHLREDRAFT_102200		H632_c51p3	contig-51	a3855r139		jgi|ChlNC64A_1|137692|IGS.gm_2_00159	scaffold_2	CBPS_CBWC_CBWF_410_1		jgi|Coc_C169_1|37860|fgenesh1_pm.16_#_25	scaffold_16	374_1_CBOZ_CBPA	Ot02g06910	OSTLU_35795	MICPUN_98107	MICPUCDRAFT_27810	VOLCADRAFT_68574
[KO:K01510]	3.6.1.5	apyrase	CHLREDRAFT_170567		H632_c2261p0	contig-2261	a48421r66		jgi|ChlNC64A_1|55545|fgenesh3_pg.C_scaffold_38000049	scaffold_1			jgi|Coc_C169_1|45287|fgenesh1_pg.23_#_41		1261_1_CBOZ_CBPA			MICPUN_87507		VOLCADRAFT_120373, 91259
[KO:K01519]	3.6.1.19	inosine triphosphate pyrophosphatase	CHLREDRAFT_179025			contig-3880	a12230r251		jgi|ChlNC64A_1|27549|e_gw1.26.244.1	scaffold_26			jgi|Coc_C169_1|35366|fgenesh1_pm.3_#_41	scaffold_3		Ot01g06120	OSTLU_12168	MICPUN_61716	MICPUCDRAFT_52462	VOLCADRAFT_110025
[KO:K01522]	3.6.1.29	bis(5'-adenosyl)-triphosphatase	CHLREDRAFT_100573		H632_c401p0	contig-401	a53513r112		jgi|ChlNC64A_1|17645|gw1.2.682.1	scaffold_2			jgi|Coc_C169_1|36245|fgenesh1_pm.6_#_93	scaffold_6	1702_1_CBOZ_CBPA	Ot03g01500	OSTLU_14523	MICPUN_89181	MICPUCDRAFT_33505	VOLCADRAFT_71460
[KO:K01835]	5.4.2.2	phosphoglucomutase	CHLREDRAFT_146213, 81483		H632_c1323p0	contig-1323	a6467r182		jgi|ChlNC64A_1|35765|estExt_Genewise1Plus.C_120203, |36032|estExt_Genewise1Plus.C_140114	scaffold_12, 14	CBPS_CBWC_CBWF_875_1, _3668_0_CBWC7715.b1		jgi|Coc_C169_1|17632|e_gw1.12.65.1	scaffold_12	3984_1_CBOZ_CBPA	Ot15g02630	OSTLU_42958	MICPUN_112722	MICPUCDRAFT_70805	VOLCADRAFT_78928
[KO:K01923]	6.3.2.6	phosphoribosylaminoimidazole-succinocarboxamide synthase	CHLREDRAFT_193566		H632_c376p1	contig-376	a17149r116		jgi|ChlNC64A_1|21289|e_gw1.5.245.1	scaffold_5	CBPS_CBWC_CBWF_263_2		jgi|Coc_C169_1|57625|Genemark1.6654_g	scaffold_15		Ot14g00600	OSTLU_43686	MICPUN_63787	MICPUCDRAFT_29996	VOLCADRAFT_84670
[KO:K01933]	6.3.3.1	phosphoribosylformylglycinamidine cyclo-ligase	CHLREDRAFT_54374		H632_c107p2	contig-107	a4423r449		jgi|ChlNC64A_1|48610|fgenesh3_pm.C_scaffold_4000045	scaffold_4	CBPS_CBWC_CBWF_117_1		jgi|Coc_C169_1|13922|e_gw1.4.464.1	scaffold_4		Ot13g01750	OSTLU_17852, 19257	MICPUN_97570	MICPUCDRAFT_44665	VOLCADRAFT_106304
[KO:K01939]	6.3.4.4	adenylosuccinate synthase	CHLREDRAFT_196727		H632_c2280p0	contig-2280	a9609r238		jgi|ChlNC64A_1|144822|IGS.gm_8_00150	scaffold_8	CBPS_CBWC_CBWF_3673_0_CBWC7800.g1		jgi|Coc_C169_1|3375|gw1.10.168.1	scaffold_10	4652_0_CBOZ3875.b1_CBOZ_CBPA	Ot06g00630	OSTLU_19549	MICPUN_97107	MICPUCDRAFT_47447	VOLCADRAFT_105550
[KO:K01945]	6.3.4.13	phosphoribosylamine--glycine ligase	CHLREDRAFT_175039		H632_c707p1	contig-707	a17117r125		jgi|ChlNC64A_1|34136|estExt_Genewise1Plus.C_30416	scaffold_3	CBPS_CBWC_CBWF_1224_1		jgi|Coc_C169_1|36993|fgenesh1_pm.10_#_81	scaffold_10		Ot12g01360	OSTLU_39441	MICPUN_106946	MICPUCDRAFT_20099	VOLCADRAFT_79479
[KO:K01951]	6.3.5.2	GMP synthase (glutamine-hydrolysing)	CHLREDRAFT_126329		H632_c318p1	contig-318	a33773r128		jgi|ChlNC64A_1|7407|gw1.8.40.1	scaffold_8			jgi|Coc_C169_1|36970|fgenesh1_pm.10_#_58	scaffold_10		Ot16g01360	OSTLU_27778	MICPUN_64504	MICPUCDRAFT_29652	VOLCADRAFT_120281
[KO:K01952]	6.3.5.3	phosphoribosylformylglycinamidine synthase	CHLREDRAFT_131059		H632_c378p1	contig-378	a33039r61		jgi|ChlNC64A_1|54589|fgenesh3_pg.C_scaffold_23000086	scaffold_23	CBPS_CBWC_CBWF_392_1		jgi|Coc_C169_1|36559|fgenesh1_pm.7_#_175	scaffold_7	409_0_CBPA7265.g1_CBOZ_CBPA	Ot06g04070	OSTLU_41441	MICPUN_97720	MICPUCDRAFT_21029	VOLCADRAFT_58690
[KO:K02320]	2.7.7.7	DNA polymerase alpha subunit A	CHLREDRAFT_177262		H632_c2178p0	contig-3828	a57965r47		jgi|ChlNC64A_1|54511|fgenesh3_pg.C_scaffold_23000008	scaffold_23	CBPS_CBWC_CBWF_1572_0_CBWC6843.b1		jgi|Coc_C169_1|27013|estExt_Genewise1Plus.C_20186	scaffold_2	1850_1_CBOZ_CBPA	Ot08g00680	OSTLU_297	MICPUN_59630	MICPUCDRAFT_26708	VOLCADRAFT_107737
[KO:K02321]	---	DNA polymerase alpha subunit B	CHLREDRAFT_146295		H632_c1454p0	contig-1454	a256979r16		jgi|ChlNC64A_1|50149|fgenesh3_pg.C_scaffold_3000022	scaffold_3			jgi|Coc_C169_1|55867|Genemark1.4896_g	scaffold_10		Ot11g01510	OSTLU_5039	MICPUN_62930	MICPUCDRAFT_20702	VOLCADRAFT_107349
[KO:K02324]	2.7.7.7	DNA polymerase epsilon subunit 1	CHLREDRAFT_9481		H632_c338p1	contig-338	a67524r30		jgi|ChlNC64A_1|54492|fgenesh3_pg.C_scaffold_22000110	scaffold_22			jgi|Coc_C169_1|41124|fgenesh1_pg.5_#_327	scaffold_5		Ot11g02010	OSTLU_150	MICPUN_63095	MICPUCDRAFT_51203	VOLCADRAFT_116136
[KO:K02325]	2.7.7.7	DNA polymerase epsilon subunit 2	CHLREDRAFT_111410		H632_c323p1	contig-323	a11547r108		jgi|ChlNC64A_1|7861|gw1.32.34.1		CBPS_CBWC_CBWF_1511_1		jgi|Coc_C169_1|10218|gw1.7.431.1	scaffold_7		Ot08g03600	OSTLU_3761, 42820	MICPUN_101999	MICPUCDRAFT_58339
[KO:K02326]	2.7.7.7	DNA polymerase epsilon subunit 3	CHLREDRAFT_101275		H632_c1157p1	contig-1157	a11765r194		jgi|ChlNC64A_1|134323|IGS.gm_11_00169	scaffold_11			jgi|Coc_C169_1|63166|Genemark1.3949_g	scaffold_7	551_1_CBOZ_CBPA		OSTLU_32755	MICPUN_60106		VOLCADRAFT_105243
[KO:K02327]	2.7.7.7	DNA polymerase delta subunit 1	CHLREDRAFT_189721		H632_c1417p1	contig-1417	a54764r51		jgi|ChlNC64A_1|20073|e_gw1.3.10.1	scaffold_3	CBPS_CBWC_CBWF_1384_1		jgi|Coc_C169_1|168|gw1.10.4.1	scaffold_10	4742_0_CBOZ486.g1_CBOZ_CBPA	Ot02g05840	OSTLU_44713	MICPUN_97378	MICPUCDRAFT_46825	VOLCADRAFT_67281
[KO:K02328]	---	DNA polymerase delta subunit 2	CHLREDRAFT_103391		H632_c1165p0	contig-1165	a60412r85		jgi|ChlNC64A_1|8793|gw1.12.133.1	scaffold_12	CBPS_CBWC_CBWF_3528_0_CBWC5571.b1		jgi|Coc_C169_1|11036|e_gw1.1.313.1	scaffold_1		Ot12g00120	OSTLU_26670	MICPUN_86679	MICPUCDRAFT_19376	VOLCADRAFT_81183
[KO:K02335]	2.7.7.7	DNA polymerase I	CHLREDRAFT_175586		H632_c3202p0	contig-3202	a3411r96		jgi|ChlNC64A_1|134785|IGS.gm_12_00171	scaffold_12	CBPS_CBWC_CBWF_3344_0_CBWC2967.b1		jgi|Coc_C169_1|597|gw1.1.72.1	scaffold_1		Ot09g02810	OSTLU_34610	MICPUN_104126	MICPUCDRAFT_46607
[KO:K02684]	2.7.7.-	DNA primase small subunit	CHLREDRAFT_54359		H632_c2917p0	contig-2917	a13046r115		jgi|ChlNC64A_1|139037|IGS.gm_23_00028	scaffold_23			jgi|Coc_C169_1|27003|estExt_Genewise1Plus.C_20156	scaffold_2	4668_0_CBOZ4055.b1_CBOZ_CBPA	Ot13g02130	OSTLU_41816, 48208		MICPUCDRAFT_63477	VOLCADRAFT_95007
[KO:K02685]	2.7.7.-	DNA primase large subunit	CHLREDRAFT_122684		H632_c1665p0	contig-1665	a41890r91		jgi|ChlNC64A_1|8101|gw1.17.28.1	scaffold_17			jgi|Coc_C169_1|3170|gw1.20.84.1	scaffold_20		Ot11g01000	OSTLU_43992	MICPUN_98146	MICPUCDRAFT_44706	VOLCADRAFT_64063
[KO:K02999]	2.7.7.6	DNA-directed RNA polymerase I subunit RPA1	CHLREDRAFT_176094		H632_c2188p0	contig-2188	a4797r185		jgi|ChlNC64A_1|139647|IGS.gm_258_00001	scaffold_10	CBPS_CBWC_CBWF_1032_0_CBWC7916.b1		jgi|Coc_C169_1|18297|e_gw1.14.2.1	scaffold_14	4803_0_CBOZ5422.g1_CBOZ_CBPA	Ot14g01100	OSTLU_43496	MICPUN_65110	MICPUCDRAFT_36623	VOLCADRAFT_105949
[KO:K03000]	---	DNA-directed RNA polymerase I subunit RPA12	CHLREDRAFT_183563		H632_c215p1	contig-215	a9100r131		jgi|ChlNC64A_1|140360|IGS.gm_3_00099	scaffold_3	CBPS_CBWC_CBWF_2216_1			scaffold_2	424_1_CBOZ_CBPA	Ot03g04700	OSTLU_14772	MICPUN_60213	MICPUCDRAFT_13420	VOLCADRAFT_107352
[KO:K03002]	2.7.7.6	DNA-directed RNA polymerase I subunit RPA2	CHLREDRAFT_113199		H632_c42p1	contig-42	a6862r278		jgi|ChlNC64A_1|138110|IGS.gm_2_00577	scaffold_2	CBPS_CBWC_CBWF_110_1		jgi|Coc_C169_1|552|gw1.24.3.1	scaffold_24	384_1_CBOZ_CBPA	Ot02g04330	OSTLU_119522	MICPUN_107316	MICPUCDRAFT_55696	VOLCADRAFT_95925
[KO:K03004]	---	DNA-directed RNA polymerase I subunit RPA43	CHLREDRAFT_147364, 166368		H632_c388p0, c1835p0	contig-2414	a9133r447, a34861r112		jgi|ChlNC64A_1|145003|IGS.gm_8_00331	scaffold_8			jgi|Coc_C169_1|40465|fgenesh1_pg.4_#_114, |42614|fgenesh1_pg.10_#_117	scaffold_10		Ot14g01850	OSTLU_25861	MICPUN_103668	MICPUCDRAFT_40447	VOLCADRAFT_98278
[KO:K03006]	2.7.7.6	DNA-directed RNA polymerase II subunit RPB1	CHLREDRAFT_196948		H632_c2188p0	contig-2188	a4404r347		jgi|ChlNC64A_1|134851|IGS.gm_12_00237	scaffold_12	CBPS_CBWC_CBWF_102_0_CBWC1190.b1		jgi|Coc_C169_1|26597|estExt_Genewise1Plus.C_10151	scaffold_1	0_0_CBOZ6743.b1_CBOZ_CBPA	Ot10g01380	OSTLU_26100	MICPUN_94662	MICPUCDRAFT_45178	VOLCADRAFT_80692
[KO:K03007]	---	DNA-directed RNA polymerases I, II, and III subunit RPABC5	CHLREDRAFT_127606		H632_c4022p0	contig-4022	a14441r433		jgi|ChlNC64A_1|18009|gw1.3.808.1	scaffold_3			jgi|Coc_C169_1|36935|fgenesh1_pm.10_#_23	scaffold_10			OSTLU_88539	MICPUN_87118	MICPUCDRAFT_20475	VOLCADRAFT_74070
[KO:K03008]	---	DNA-directed RNA polymerase II subunit RPB11	CHLREDRAFT_182662		H632_c85p0	contig-85	a13450r216		jgi|ChlNC64A_1|14982|gw1.29.152.1	scaffold_29			jgi|Coc_C169_1|10880|gw1.25.128.1	scaffold_25			OSTLU_35735	MICPUN_76999	MICPUCDRAFT_50333	VOLCADRAFT_103489
[KO:K03009]	---	DNA-directed RNA polymerases I, II, and III subunit RPABC4	CHLREDRAFT_78868			contig-992	a12455r165		jgi|ChlNC64A_1|19308|e_gw1.2.521.1	scaffold_2			jgi|Coc_C169_1|9893|gw1.1.806.1	scaffold_1	1352_1_CBOZ_CBPA	Ot02g03900	OSTLU_119610			VOLCADRAFT_61695
[KO:K03010]	2.7.7.6	DNA-directed RNA polymerase II subunit RPB2	CHLREDRAFT_186432		H632_c74p1	contig-74	a2487r167		jgi|ChlNC64A_1|59036|estExt_fgenesh3_pg.C_240094	scaffold_24	CBPS_CBWC_CBWF_110_2		jgi|Coc_C169_1|38470|fgenesh1_pm.21_#_51	scaffold_21	384_0_CBOZ4728.b1_CBOZ_CBPA	Ot01g01700	OSTLU_13673	MICPUN_93697	MICPUCDRAFT_31670	VOLCADRAFT_103593
[KO:K03011]	---	DNA-directed RNA polymerase II subunit RPB3	CHLREDRAFT_111305		H632_c1241p1	contig-1241	a10254r132		jgi|ChlNC64A_1|34973|estExt_Genewise1Plus.C_70089	scaffold_7	CBPS_CBWC_CBWF_3777_0_CBWF2605.b1		jgi|Coc_C169_1|26292|estExt_Genewise1.C_230068	scaffold_23	0_0_CBOZ1620.b1_CBOZ_CBPA	Ot02g01760	OSTLU_119616	MICPUN_107412	MICPUCDRAFT_18521	VOLCADRAFT_88650
[KO:K03013]	---	DNA-directed RNA polymerases I, II, and III subunit RPABC1	CHLREDRAFT_151082		H632_c2414p0	contig-4281	a60884r62		jgi|ChlNC64A_1|12900|gw1.12.326.1	scaffold_12			jgi|Coc_C169_1|36652|fgenesh1_pm.8_#_52	scaffold_8	2753_1_CBOZ_CBPA	Ot04g05140	OSTLU_36865	MICPUN_98039	MICPUCDRAFT_69210	VOLCADRAFT_109457
[KO:K03014]	---	DNA-directed RNA polymerases I, II, and III subunit RPABC2	CHLREDRAFT_107215		H632_c524p1	contig-524	a5593r321		jgi|ChlNC64A_1|14375|gw1.6.265.1	scaffold_6			jgi|Coc_C169_1|36518|fgenesh1_pm.7_#_134	scaffold_7	1028_1_CBOZ_CBPA	Ot02g00410	OSTLU_8797	MICPUN_61090	MICPUCDRAFT_18346	VOLCADRAFT_106747
[KO:K03015]	---	DNA-directed RNA polymerase II subunit RPB7	CHLREDRAFT_189366		H632_c1511p1	contig-1511	a2352r120		jgi|ChlNC64A_1|31793|estExt_Genewise1.C_140294	scaffold_14	CBPS_CBWC_CBWF_0_0_CBWF5632.b1		jgi|Coc_C169_1|54126|estExt_fgenesh1_pm.C_130056	scaffold_13	3946_1_CBOZ_CBPA	Ot10g01880	OSTLU_26149, 37948	MICPUN_78358	MICPUCDRAFT_57269, 58220	VOLCADRAFT_74564
[KO:K03016]	---	DNA-directed RNA polymerases I, II, and III subunit RPABC3	CHLREDRAFT_126483		H632_c1286p2	contig-1286	a10707r216		jgi|ChlNC64A_1|33923|estExt_Genewise1Plus.C_20516	scaffold_2	CBPS_CBWC_CBWF_922_0_CBWF6466.g1		jgi|Coc_C169_1|8970|gw1.19.303.1	scaffold_19			OSTLU_12967	MICPUN_98777		VOLCADRAFT_82285
[KO:K03017]	---	DNA-directed RNA polymerase II subunit RPB9	CHLREDRAFT_135424		H632_c1778p1	contig-1778	a6494r430		jgi|ChlNC64A_1|49046|fgenesh3_pm.C_scaffold_18000029	scaffold_18			jgi|Coc_C169_1|37322|fgenesh1_pm.12_#_65	scaffold_12			OSTLU_119611	MICPUN_51672		VOLCADRAFT_57912
[KO:K03018]	2.7.7.6	DNA-directed RNA polymerase III subunit RPC1	CHLREDRAFT_169121		H632_c771p0	contig-771	a31607r56		jgi|ChlNC64A_1|138029|IGS.gm_2_00496	scaffold_12	CBPS_CBWC_CBWF_102_0_CBWC6006.b1		jgi|Coc_C169_1|44617|fgenesh1_pg.18_#_219	scaffold_18	4803_0_CBOZ5422.b1_CBOZ_CBPA	Ot02g06220	OSTLU_24022	MICPUN_82079	MICPUCDRAFT_46863	VOLCADRAFT_81566
[KO:K03019]	---	DNA-directed RNA polymerase III subunit RPC10	CHLREDRAFT_76582			contig-1778	a352896r11		jgi|ChlNC64A_1|135086|IGS.gm_13_00014	scaffold_13			jgi|Coc_C169_1|36434|fgenesh1_pm.7_#_50	scaffold_7	2838_1_CBOZ_CBPA	Ot03g03890	OSTLU_34016	MICPUN_78504	MICPUCDRAFT_43884	VOLCADRAFT_56639
[KO:K03020]	---	DNA-directed RNA polymerases I and III subunit RPAC2	CHLREDRAFT_123383				a13450r216			scaffold_4			jgi|Coc_C169_1|56503|Genemark1.5532_g	scaffold_11			OSTLU_30435	MICPUN_80643	MICPUCDRAFT_21450	VOLCADRAFT_63657
[KO:K03021]	2.7.7.6	DNA-directed RNA polymerase III subunit RPC2	CHLREDRAFT_129857		H632_c74p1	contig-3218	a7563r193		jgi|ChlNC64A_1|56318|estExt_fgenesh3_pm.C_230008	scaffold_23	CBPS_CBWC_CBWF_2084_1		jgi|Coc_C169_1|35179|fgenesh1_pm.2_#_189	scaffold_2	3318_1_CBOZ_CBPA	Ot01g06000	OSTLU_39835	MICPUN_86086	MICPUCDRAFT_22087	VOLCADRAFT_66175
[KO:K03022]	---	DNA-directed RNA polymerase III subunit RPC8	CHLREDRAFT_79435		H632_c754p1	contig-754	a8761r257		jgi|ChlNC64A_1|145291|IGS.gm_9_00098	scaffold_9			jgi|Coc_C169_1|34898|fgenesh1_pm.1_#_239	scaffold_1	3946_1_CBOZ_CBPA	Ot06g00120	OSTLU_15619	MICPUN_79748		VOLCADRAFT_74791
[KO:K03023]	---	DNA-directed RNA polymerase III subunit RPC3	CHLREDRAFT_174488				a35479r67		jgi|ChlNC64A_1|139103|IGS.gm_23_00094	scaffold_23	CBPS_CBWC_CBWF_203_0_CBWC6769.g1		jgi|Coc_C169_1|43175|fgenesh1_pg.12_#_114	scaffold_12		Ot02g00840		MICPUN_107346	MICPUCDRAFT_64484	VOLCADRAFT_89829
[KO:K03025]	---	DNA-directed RNA polymerase III subunit RPC6	CHLREDRAFT_155892		H632_c2739p0	contig-2739	a4089r420		jgi|ChlNC64A_1|48173|fgenesh3_kg.C_scaffold_5000017	scaffold_5	CBPS_CBWC_CBWF_3046_1		jgi|Coc_C169_1|35994|fgenesh1_pm.5_#_93	scaffold_5		Ot18g01360	OSTLU_42021	MICPUN_83487	MICPUCDRAFT_43793	VOLCADRAFT_118667
[KO:K03026]	---	DNA-directed RNA polymerase III subunit RPC4	CHLREDRAFT_154065						jgi|ChlNC64A_1|144796|IGS.gm_8_00124	scaffold_8			jgi|Coc_C169_1|66646|estExt_Genemark1.C_100350	scaffold_10	4818_0_CBOZ5529.g1_CBOZ_CBPA			MICPUN_55350		VOLCADRAFT_103709
[KO:K03504]	---	DNA polymerase delta subunit 3	CHLREDRAFT_190579		H632_c2919p0	contig-2919	a39572r157		jgi|ChlNC64A_1|141301|IGS.gm_33_00011				jgi|Coc_C169_1|60931|Genemark1.1742_g	scaffold_3	1169_1_CBOZ_CBPA			MICPUN_60841
[KO:K03505]	---	DNA polymerase delta subunit 4	CHLREDRAFT_185774		H632_c787p0		a54347r85		jgi|ChlNC64A_1|136929|IGS.gm_18_00035	scaffold_18			jgi|Coc_C169_1|54434|estExt_fgenesh1_pm.C_160078		728_1_CBOZ_CBPA	Ot07g02450	OSTLU_32665	MICPUN_98861	MICPUCDRAFT_57378
[KO:K03787]	3.1.3.5	5'-nucleotidase	CHLREDRAFT_144281		H632_c1980p0	contig-1980	a27719r138		jgi|ChlNC64A_1|137835|IGS.gm_2_00302	scaffold_2			jgi|Coc_C169_1|6176|gw1.10.331.1	scaffold_10				MICPUN_106294	MICPUCDRAFT_47829	VOLCADRAFT_86716
[KO:K06928]	3.6.1.15	nucleoside-triphosphatase THEP1	CHLREDRAFT_100906																	VOLCADRAFT_80686
[KO:K10807]	1.17.4.1	ribonucleoside-diphosphate reductase subunit M1	CHLREDRAFT_185583		H632_c114p0	contig-114	a3598r422		jgi|ChlNC64A_1|6534|gw1.26.15.1	scaffold_26	CBPS_CBWC_CBWF_709_1		jgi|Coc_C169_1|38039|fgenesh1_pm.17_#_68	scaffold_17	3829_1_CBOZ_CBPA	Ot01g00100	OSTLU_48569	MICPUN_93299	MICPUCDRAFT_31349	VOLCADRAFT_82353
[KO:K10808]	1.17.4.1	ribonucleoside-diphosphate reductase subunit M2	CHLREDRAFT_144621, 188785		H632_c60p0	contig-60	a12243r219		jgi|ChlNC64A_1|9969|gw1.3.246.1, |34103|estExt_Genewise1Plus.C_30356	scaffold_20, 3	CBPS_CBWC_CBWF_0_0_CBWC1270.b1		jgi|Coc_C169_1|36138|fgenesh1_pm.5_#_237, |5739|gw1.4.520.1	scaffold_4	3509_1_CBOZ_CBPA	Ot12g01290	OSTLU_32923, 39468	MICPUN_91276, 94589	MICPUCDRAFT_33344, 45157	VOLCADRAFT_101784, 109884
[KO:K11808]	4.1.1.21	phosphoribosylaminoimidazole carboxylase	CHLREDRAFT_196726		H632_c2483p0	contig-2243	a34340r66		jgi|ChlNC64A_1|24822|e_gw1.14.395.1	scaffold_14	CBPS_CBWC_CBWF_739_1		jgi|Coc_C169_1|24879|estExt_Genewise1.C_130093	scaffold_13	4139_1_CBOZ_CBPA	Ot09g00850	OSTLU_33376	MICPUN_98347	MICPUCDRAFT_15308	VOLCADRAFT_88132
[KO:K12319]	4.6.1.2	guanylate cyclase soluble subunit beta	CHLREDRAFT_142791								CBPS_CBWC_CBWF_2096_1				2778_1_CBOZ_CBPA					VOLCADRAFT_61364
[KO:K13484]	3.5.2.17; 4.1.1.-	5-hydroxyisourate hydrolase / 2-oxo-4-hydroxy-4-carboxy-5-ureidoimidazoline decarboxylase	CHLREDRAFT_139658			contig-2205	a272101r12		jgi|ChlNC64A_1|48302|fgenesh3_kg.C_scaffold_22000001	scaffold_22	CBPS_CBWC_CBWF_2440_1		jgi|Coc_C169_1|62460|Genemark1.3243_g	scaffold_6	2744_1_CBOZ_CBPA					VOLCADRAFT_79808
[KO:K13755]	3.1.4.17	calcium/calmodulin-dependent 3',5'-cyclic nucleotide phosphodiesterase	CHLREDRAFT_114709, 116276, 116500		H632_c1383p0	contig-1869	a45833r61		jgi|ChlNC64A_1|30010|estExt_Genewise1.C_40067, |8639|gw1.4.137.1	scaffold_4	CBPS_CBWC_CBWF_3953_0_CBWF6183.g1		jgi|Coc_C169_1|5325|gw1.20.136.1	scaffold_4, 10					MICPUCDRAFT_4522	VOLCADRAFT_59941, 80068
[KO:K13987]	3.6.1.13; 3.6.1.58; 3.6.1.-	ADP-sugar pyrophosphatase / 8-oxo-dGDP phosphatase	CHLREDRAFT_193044						jgi|ChlNC64A_1|12990|gw1.2.368.1	scaffold_2			jgi|Coc_C169_1|45125|fgenesh1_pg.22_#_10		3773_0_CBOZ4050.b1_CBOZ_CBPA	Ot10g00780
[KO:K14641]	3.6.1.5	apyrase	CHLREDRAFT_167044		H632_c2261p0	contig-2261	a48421r66		jgi|ChlNC64A_1|133515|IGS.gm_1_00651	scaffold_1	CBPS_CBWC_CBWF_0_0_CBWC5146.b1		jgi|Coc_C169_1|53288|estExt_fgenesh1_pm.C_60207	scaffold_6	709_1_CBOZ_CBPA	Ot04g01290	OSTLU_36812	MICPUN_84198	MICPUCDRAFT_32900	VOLCADRAFT_78871
[KO:K14721]	---	DNA-directed RNA polymerase III subunit RPC5	CHLREDRAFT_143043		H632_c430p0	contig-430	a42418r81		jgi|ChlNC64A_1|50550|fgenesh3_pg.C_scaffold_4000049	scaffold_4			jgi|Coc_C169_1|61395|Genemark1.2185_g	scaffold_4	3269_2_CBOZ_CBPA	Ot01g02230	OSTLU_28831	MICPUN_55174	MICPUCDRAFT_55547	VOLCADRAFT_87172
[KO:K14977]	3.5.3.-	ureidoglycine aminohydrolase	CHLREDRAFT_34332		H632_c639p1	contig-639	a16593r169		jgi|ChlNC64A_1|17250|gw1.14.449.1	scaffold_14			jgi|Coc_C169_1|38702|fgenesh1_pm.25_#_27	scaffold_25	3583_1_CBOZ_CBPA			MICPUN_71152, 97304		VOLCADRAFT_84422
00232_Caffeine_metabolism
[KO:K00106]	1.17.1.4; 1.17.3.2	xanthine dehydrogenase/oxidase	CHLREDRAFT_117669		H632_c1184p1	contig-1184	a14722r150		jgi|ChlNC64A_1|53854|fgenesh3_pg.C_scaffold_18000044	scaffold_18	CBPS_CBWC_CBWF_1346_1		jgi|Coc_C169_1|37297|fgenesh1_pm.12_#_40	scaffold_12	2067_1_CBOZ_CBPA			MICPUN_83794		VOLCADRAFT_63971
[KO:K00365]	1.7.3.3	urate oxidase	CHLREDRAFT_183011		H632_c53p1	contig-53	a7255r282		jgi|ChlNC64A_1|10922|gw1.3.304.1	scaffold_3	CBPS_CBWC_CBWF_2073_1		jgi|Coc_C169_1|35139|fgenesh1_pm.2_#_149	scaffold_2	106_1_CBOZ_CBPA			MICPUN_64532		VOLCADRAFT_73602
00240_Pyrimidine_metabolism
[KO:K00207]	1.3.1.2	dihydropyrimidine dehydrogenase (NADP+)	CHLREDRAFT_134846		H632_c750p1	contig-750	a6554r192		jgi|ChlNC64A_1|48243|fgenesh3_kg.C_scaffold_12000014	scaffold_129	CBPS_CBWC_CBWF_405_1		jgi|Coc_C169_1|3972|gw1.14.146.1	scaffold_14				MICPUN_109450		VOLCADRAFT_80405
[KO:K00254]	1.3.5.2	dihydroorotate dehydrogenase	CHLREDRAFT_152239		H632_c4770p0	contig-4770	a81763r34		jgi|ChlNC64A_1|51646|fgenesh3_pg.C_scaffold_7000193	scaffold_7			jgi|Coc_C169_1|38118|fgenesh1_pm.18_#_71	scaffold_18	1849_1_CBOZ_CBPA	Ot12g00230	OSTLU_13090	MICPUN_64581	MICPUCDRAFT_44893
[KO:K00384]	1.8.1.9	thioredoxin reductase (NADPH)	CHLREDRAFT_132865, 195914, 78928		H632_c195p2, c134p2	contig-195, 1241	a11718r272, a10254r132		jgi|ChlNC64A_1|20550|e_gw1.4.155.1, |16430|gw1.7.309.1, |23746|e_gw1.11.82.1	scaffold_4, 11	CBPS_CBWC_CBWF_1285_1, _1628_0_CBWF3240.g1		jgi|Coc_C169_1|40474|fgenesh1_pg.4_#_123, |1838|gw1.23.26.1, |2983|gw1.4.268.1	scaffold_4, 9	1119_1_CBOZ_CBPA, 2072_0_CBOZ1858.b1_CBOZ_CBPA	Ot01g04150, Ot18g00250	OSTLU_28227, 29046	MICPUN_113706	MICPUCDRAFT_23559, 70201	VOLCADRAFT_107487, 127304
[KO:K00609]	2.1.3.2	aspartate carbamoyltransferase catalytic subunit	CHLREDRAFT_31		H632_c2p1	contig-2	a35742r110		jgi|ChlNC64A_1|9562|gw1.8.128.1	scaffold_8	CBPS_CBWC_CBWF_2452_1		jgi|Coc_C169_1|24269|estExt_Genewise1.C_100240	scaffold_10	0_0_CBOZ6163.b1_CBOZ_CBPA		OSTLU_19816	MICPUN_98407	MICPUCDRAFT_19938	VOLCADRAFT_102225
[KO:K00761]	2.4.2.9	uracil phosphoribosyltransferase	CHLREDRAFT_132204						jgi|ChlNC64A_1|12558|gw1.26.230.1	scaffold_26			jgi|Coc_C169_1|54481|estExt_fgenesh1_pm.C_170013	scaffold_17	4305_1_CBOZ_CBPA	Ot07g03320	OSTLU_32758	MICPUN_97665	MICPUCDRAFT_43815	VOLCADRAFT_92181
[KO:K00857]	2.7.1.21	thymidine kinase	CHLREDRAFT_102571						jgi|ChlNC64A_1|136051|IGS.gm_15_00147	scaffold_15	CBPS_CBWC_CBWF_1824_1		jgi|Coc_C169_1|10644|gw1.3.636.1	scaffold_3	939_1_CBOZ_CBPA		OSTLU_14315, 6807	MICPUN_51821, 63991	MICPUCDRAFT_13654, 56152	VOLCADRAFT_84037
[KO:K00876]	2.7.1.48	uridine kinase	CHLREDRAFT_170716, 77471		H632_c3961p0	contig-3961	a14436r246		jgi|ChlNC64A_1|33819|estExt_Genewise1Plus.C_20254	scaffold_2	CBPS_CBWC_CBWF_1013_1		jgi|Coc_C169_1|4212|gw1.19.136.1, |38181|fgenesh1_pm.19_#_3	scaffold_19	5131_0_CBOZ9874.b1_CBOZ_CBPA	Ot17g02610	OSTLU_47740	MICPUN_82049	MICPUCDRAFT_49146	VOLCADRAFT_104172, 59311
[KO:K00940]	2.7.4.6	nucleoside-diphosphate kinase	CHLREDRAFT_180172, 180221, 58944		H632_c3233p0, c3486p0	contig-3233	a6009r415, a27379r130		jgi|ChlNC64A_1|137577|IGS.gm_2_00044, |13616|gw1.3.465.1, |48171|fgenesh3_kg.C_scaffold_5000015	scaffold_2, 5	CBPS_CBWC_CBWF_1823_1		jgi|Coc_C169_1|37329|fgenesh1_pm.12_#_72, |38133|fgenesh1_pm.18_#_86	scaffold_12	1507_1_, 433_1_CBOZ_CBPA	Ot11g02680, Ot15g00140	OSTLU_26583, 26635, 27292	MICPUN_88956, 92159, 98189	MICPUCDRAFT_20218, 35405, 60912	VOLCADRAFT_106657, 79018, 81768
[KO:K00943]	2.7.4.9	dTMP kinase	CHLREDRAFT_128562		H632_c1047p0	contig-1047	a18529r228		jgi|ChlNC64A_1|11885|gw1.5.314.1	scaffold_5			jgi|Coc_C169_1|7872|gw1.15.191.1	scaffold_15	2600_1_CBOZ_CBPA	Ot07g01210	OSTLU_32539	MICPUN_78442	MICPUCDRAFT_26583	VOLCADRAFT_107597
[KO:K00962]	2.7.7.8	polyribonucleotide nucleotidyltransferase	CHLREDRAFT_193253				a59234r33		jgi|ChlNC64A_1|36088|estExt_Genewise1Plus.C_140272	scaffold_14	CBPS_CBWC_CBWF_3514_0_CBWC5400.b1		jgi|Coc_C169_1|769|gw1.16.10.1	scaffold_16		Ot02g05570, Ot03g00740	OSTLU_12216, 34347	MICPUN_79594, 88427	MICPUCDRAFT_31304, 52438	VOLCADRAFT_107702
[KO:K01240]	3.2.2.3	uridine nucleosidase	CHLREDRAFT_23981		H632_c246p0	contig-246	a47054r65		jgi|ChlNC64A_1|48262|fgenesh3_kg.C_scaffold_15000004	scaffold_15	CBPS_CBWC_CBWF_1164_1		jgi|Coc_C169_1|11084|e_gw1.1.561.1	scaffold_1	3701_0_CBOZ7609.g1_CBOZ_CBPA			MICPUN_58579	MICPUCDRAFT_15593	VOLCADRAFT_55637
[KO:K01431]	3.5.1.6	beta-ureidopropionase	CHLREDRAFT_157234		H632_c2271p0	contig-2271	a53826r42		jgi|ChlNC64A_1|140469|IGS.gm_3_00208	scaffold_3	CBPS_CBWC_CBWF_2086_1		jgi|Coc_C169_1|48894|estExt_fgenesh1_pg.C_190027		3916_1_CBOZ_CBPA			MICPUN_107980		VOLCADRAFT_66898
[KO:K01464]	3.5.2.2	dihydropyrimidinase	CHLREDRAFT_97227		H632_c468p1	contig-468	a55886r45		jgi|ChlNC64A_1|7764|gw1.11.57.1	scaffold_11	CBPS_CBWC_CBWF_2247_1		jgi|Coc_C169_1|2928|gw1.1.249.1	scaffold_1	2785_1_CBOZ_CBPA					VOLCADRAFT_60577
[KO:K01465]	3.5.2.3	dihydroorotase	CHLREDRAFT_178140		H632_c320p0	contig-320	a62888r46		jgi|ChlNC64A_1|54111|fgenesh3_pg.C_scaffold_19000136	scaffold_19			jgi|Coc_C169_1|52717|estExt_fgenesh1_pm.C_30256	scaffold_3	2436_1_CBOZ_CBPA	Ot13g02310	OSTLU_27192, 29717	MICPUN_59264	MICPUCDRAFT_34985	VOLCADRAFT_120698
[KO:K01489]	3.5.4.5	cytidine deaminase	CHLREDRAFT_127415		H632_c563p2	contig-563	a96871r43		jgi|ChlNC64A_1|133403|IGS.gm_1_00539	scaffold_1	CBPS_CBWC_CBWF_8_0_CBWF5010.g1		jgi|Coc_C169_1|43600|fgenesh1_pg.14_#_15	scaffold_14		Ot05g00400	OSTLU_6240	MICPUN_53978	MICPUCDRAFT_57408	VOLCADRAFT_104182
[KO:K01493]	3.5.4.12	dCMP deaminase	CHLREDRAFT_154823		H632_c1302p1	contig-1302	a56228r40		jgi|ChlNC64A_1|13513|gw1.8.289.1	scaffold_8				scaffold_2			OSTLU_8218
[KO:K01510]	3.6.1.5	apyrase	CHLREDRAFT_170567		H632_c2261p0	contig-2261	a48421r66		jgi|ChlNC64A_1|55545|fgenesh3_pg.C_scaffold_38000049	scaffold_1			jgi|Coc_C169_1|45287|fgenesh1_pg.23_#_41		1261_1_CBOZ_CBPA			MICPUN_87507		VOLCADRAFT_120373, 91259
[KO:K01519]	3.6.1.19	inosine triphosphate pyrophosphatase	CHLREDRAFT_179025			contig-3880	a12230r251		jgi|ChlNC64A_1|27549|e_gw1.26.244.1	scaffold_26			jgi|Coc_C169_1|35366|fgenesh1_pm.3_#_41	scaffold_3		Ot01g06120	OSTLU_12168	MICPUN_61716	MICPUCDRAFT_52462	VOLCADRAFT_110025
[KO:K01520]	3.6.1.23	dUTP pyrophosphatase	CHLREDRAFT_100842		H632_c5376p0	contig-5060	a26624r103		jgi|ChlNC64A_1|28024|e_gw1.29.143.1	scaffold_29			jgi|Coc_C169_1|35195|fgenesh1_pm.2_#_205	scaffold_2	2400_1_CBOZ_CBPA	Ot17g02590	OSTLU_28197	MICPUN_97460	MICPUCDRAFT_54088	VOLCADRAFT_109897
[KO:K01937]	6.3.4.2	CTP synthase	CHLREDRAFT_176554		H632_c7p2	contig-7	a3181r303		jgi|ChlNC64A_1|139286|IGS.gm_24_00066	scaffold_24	CBPS_CBWC_CBWF_0_0_CBWC908.b1		jgi|Coc_C169_1|2070|gw1.14.62.1	scaffold_14	3948_1_CBOZ_CBPA		OSTLU_28993	MICPUN_55251	MICPUCDRAFT_70230	VOLCADRAFT_84560
[KO:K01955]	6.3.5.5	carbamoyl-phosphate synthase large subunit	CHLREDRAFT_195255		H632_c544p0	contig-544	a5874r213		jgi|ChlNC64A_1|58986|estExt_fgenesh3_pg.C_240034	scaffold_24	CBPS_CBWC_CBWF_36_2		jgi|Coc_C169_1|37654|fgenesh1_pm.14_#_88	scaffold_14	1048_1_CBOZ_CBPA	Ot08g02450	OSTLU_42572	MICPUN_104797	MICPUCDRAFT_16722	VOLCADRAFT_77870
[KO:K01956]	6.3.5.5	carbamoyl-phosphate synthase small subunit	CHLREDRAFT_128227		H632_c88p1	contig-88	a81953r70		jgi|ChlNC64A_1|137867|IGS.gm_2_00334	scaffold_2	CBPS_CBWC_CBWF_2063_1		jgi|Coc_C169_1|3546|gw1.22.67.1	scaffold_22	4059_1_CBOZ_CBPA		OSTLU_28074	MICPUN_105618	MICPUCDRAFT_46001	VOLCADRAFT_81499
[KO:K02320]	2.7.7.7	DNA polymerase alpha subunit A	CHLREDRAFT_177262		H632_c2178p0	contig-3828	a57965r47		jgi|ChlNC64A_1|54511|fgenesh3_pg.C_scaffold_23000008	scaffold_23	CBPS_CBWC_CBWF_1572_0_CBWC6843.b1		jgi|Coc_C169_1|27013|estExt_Genewise1Plus.C_20186	scaffold_2	1850_1_CBOZ_CBPA	Ot08g00680	OSTLU_297	MICPUN_59630	MICPUCDRAFT_26708	VOLCADRAFT_107737
[KO:K02321]	---	DNA polymerase alpha subunit B	CHLREDRAFT_146295		H632_c1454p0	contig-1454	a256979r16		jgi|ChlNC64A_1|50149|fgenesh3_pg.C_scaffold_3000022	scaffold_3			jgi|Coc_C169_1|55867|Genemark1.4896_g	scaffold_10		Ot11g01510	OSTLU_5039	MICPUN_62930	MICPUCDRAFT_20702	VOLCADRAFT_107349
[KO:K02324]	2.7.7.7	DNA polymerase epsilon subunit 1	CHLREDRAFT_9481		H632_c338p1	contig-338	a67524r30		jgi|ChlNC64A_1|54492|fgenesh3_pg.C_scaffold_22000110	scaffold_22			jgi|Coc_C169_1|41124|fgenesh1_pg.5_#_327	scaffold_5		Ot11g02010	OSTLU_150	MICPUN_63095	MICPUCDRAFT_51203	VOLCADRAFT_116136
[KO:K02325]	2.7.7.7	DNA polymerase epsilon subunit 2	CHLREDRAFT_111410		H632_c323p1	contig-323	a11547r108		jgi|ChlNC64A_1|7861|gw1.32.34.1		CBPS_CBWC_CBWF_1511_1		jgi|Coc_C169_1|10218|gw1.7.431.1	scaffold_7		Ot08g03600	OSTLU_3761, 42820	MICPUN_101999	MICPUCDRAFT_58339
[KO:K02326]	2.7.7.7	DNA polymerase epsilon subunit 3	CHLREDRAFT_101275		H632_c1157p1	contig-1157	a11765r194		jgi|ChlNC64A_1|134323|IGS.gm_11_00169	scaffold_11			jgi|Coc_C169_1|63166|Genemark1.3949_g	scaffold_7	551_1_CBOZ_CBPA		OSTLU_32755	MICPUN_60106		VOLCADRAFT_105243
[KO:K02327]	2.7.7.7	DNA polymerase delta subunit 1	CHLREDRAFT_189721		H632_c1417p1	contig-1417	a54764r51		jgi|ChlNC64A_1|20073|e_gw1.3.10.1	scaffold_3	CBPS_CBWC_CBWF_1384_1		jgi|Coc_C169_1|168|gw1.10.4.1	scaffold_10	4742_0_CBOZ486.g1_CBOZ_CBPA	Ot02g05840	OSTLU_44713	MICPUN_97378	MICPUCDRAFT_46825	VOLCADRAFT_67281
[KO:K02328]	---	DNA polymerase delta subunit 2	CHLREDRAFT_103391		H632_c1165p0	contig-1165	a60412r85		jgi|ChlNC64A_1|8793|gw1.12.133.1	scaffold_12	CBPS_CBWC_CBWF_3528_0_CBWC5571.b1		jgi|Coc_C169_1|11036|e_gw1.1.313.1	scaffold_1		Ot12g00120	OSTLU_26670	MICPUN_86679	MICPUCDRAFT_19376	VOLCADRAFT_81183
[KO:K02335]	2.7.7.7	DNA polymerase I	CHLREDRAFT_175586		H632_c3202p0	contig-3202	a3411r96		jgi|ChlNC64A_1|134785|IGS.gm_12_00171	scaffold_12	CBPS_CBWC_CBWF_3344_0_CBWC2967.b1		jgi|Coc_C169_1|597|gw1.1.72.1	scaffold_1		Ot09g02810	OSTLU_34610	MICPUN_104126	MICPUCDRAFT_46607
[KO:K02684]	2.7.7.-	DNA primase small subunit	CHLREDRAFT_54359		H632_c2917p0	contig-2917	a13046r115		jgi|ChlNC64A_1|139037|IGS.gm_23_00028	scaffold_23			jgi|Coc_C169_1|27003|estExt_Genewise1Plus.C_20156	scaffold_2	4668_0_CBOZ4055.b1_CBOZ_CBPA	Ot13g02130	OSTLU_41816, 48208		MICPUCDRAFT_63477	VOLCADRAFT_95007
[KO:K02685]	2.7.7.-	DNA primase large subunit	CHLREDRAFT_122684		H632_c1665p0	contig-1665	a41890r91		jgi|ChlNC64A_1|8101|gw1.17.28.1	scaffold_17			jgi|Coc_C169_1|3170|gw1.20.84.1	scaffold_20		Ot11g01000	OSTLU_43992	MICPUN_98146	MICPUCDRAFT_44706	VOLCADRAFT_64063
[KO:K02999]	2.7.7.6	DNA-directed RNA polymerase I subunit RPA1	CHLREDRAFT_176094		H632_c2188p0	contig-2188	a4797r185		jgi|ChlNC64A_1|139647|IGS.gm_258_00001	scaffold_10	CBPS_CBWC_CBWF_1032_0_CBWC7916.b1		jgi|Coc_C169_1|18297|e_gw1.14.2.1	scaffold_14	4803_0_CBOZ5422.g1_CBOZ_CBPA	Ot14g01100	OSTLU_43496	MICPUN_65110	MICPUCDRAFT_36623	VOLCADRAFT_105949
[KO:K03000]	---	DNA-directed RNA polymerase I subunit RPA12	CHLREDRAFT_183563		H632_c215p1	contig-215	a9100r131		jgi|ChlNC64A_1|140360|IGS.gm_3_00099	scaffold_3	CBPS_CBWC_CBWF_2216_1			scaffold_2	424_1_CBOZ_CBPA	Ot03g04700	OSTLU_14772	MICPUN_60213	MICPUCDRAFT_13420	VOLCADRAFT_107352
[KO:K03002]	2.7.7.6	DNA-directed RNA polymerase I subunit RPA2	CHLREDRAFT_113199		H632_c42p1	contig-42	a6862r278		jgi|ChlNC64A_1|138110|IGS.gm_2_00577	scaffold_2	CBPS_CBWC_CBWF_110_1		jgi|Coc_C169_1|552|gw1.24.3.1	scaffold_24	384_1_CBOZ_CBPA	Ot02g04330	OSTLU_119522	MICPUN_107316	MICPUCDRAFT_55696	VOLCADRAFT_95925
[KO:K03004]	---	DNA-directed RNA polymerase I subunit RPA43	CHLREDRAFT_147364, 166368		H632_c388p0, c1835p0		a34861r112		jgi|ChlNC64A_1|145003|IGS.gm_8_00331	scaffold_8			jgi|Coc_C169_1|40465|fgenesh1_pg.4_#_114, |42614|fgenesh1_pg.10_#_117	scaffold_10		Ot14g01850	OSTLU_25861	MICPUN_103668	MICPUCDRAFT_40447	VOLCADRAFT_98278
[KO:K03006]	2.7.7.6	DNA-directed RNA polymerase II subunit RPB1	CHLREDRAFT_196948		H632_c2188p0	contig-2188	a4404r347		jgi|ChlNC64A_1|134851|IGS.gm_12_00237	scaffold_12	CBPS_CBWC_CBWF_102_0_CBWC1190.b1		jgi|Coc_C169_1|26597|estExt_Genewise1Plus.C_10151	scaffold_1	0_0_CBOZ6743.b1_CBOZ_CBPA	Ot10g01380	OSTLU_26100	MICPUN_94662	MICPUCDRAFT_45178	VOLCADRAFT_80692
[KO:K03007]	---	DNA-directed RNA polymerases I, II, and III subunit RPABC5	CHLREDRAFT_127606		H632_c4022p0	contig-4022	a14441r433		jgi|ChlNC64A_1|18009|gw1.3.808.1	scaffold_3			jgi|Coc_C169_1|36935|fgenesh1_pm.10_#_23	scaffold_10			OSTLU_88539	MICPUN_87118	MICPUCDRAFT_20475	VOLCADRAFT_74070
[KO:K03008]	---	DNA-directed RNA polymerase II subunit RPB11	CHLREDRAFT_182662		H632_c85p0	contig-85	a13450r216		jgi|ChlNC64A_1|14982|gw1.29.152.1	scaffold_29			jgi|Coc_C169_1|10880|gw1.25.128.1	scaffold_25			OSTLU_35735	MICPUN_76999	MICPUCDRAFT_50333	VOLCADRAFT_103489
[KO:K03009]	---	DNA-directed RNA polymerases I, II, and III subunit RPABC4	CHLREDRAFT_78868			contig-992	a12455r165		jgi|ChlNC64A_1|19308|e_gw1.2.521.1	scaffold_2			jgi|Coc_C169_1|9893|gw1.1.806.1	scaffold_1	1352_1_CBOZ_CBPA	Ot02g03900	OSTLU_119610			VOLCADRAFT_61695
[KO:K03010]	2.7.7.6	DNA-directed RNA polymerase II subunit RPB2	CHLREDRAFT_186432		H632_c74p1	contig-74	a2487r167		jgi|ChlNC64A_1|59036|estExt_fgenesh3_pg.C_240094	scaffold_24	CBPS_CBWC_CBWF_110_2		jgi|Coc_C169_1|38470|fgenesh1_pm.21_#_51	scaffold_21	384_0_CBOZ4728.b1_CBOZ_CBPA	Ot01g01700	OSTLU_13673	MICPUN_93697	MICPUCDRAFT_31670	VOLCADRAFT_103593
[KO:K03011]	---	DNA-directed RNA polymerase II subunit RPB3	CHLREDRAFT_111305		H632_c1241p1	contig-1241	a10254r132		jgi|ChlNC64A_1|34973|estExt_Genewise1Plus.C_70089	scaffold_7	CBPS_CBWC_CBWF_3777_0_CBWF2605.b1		jgi|Coc_C169_1|26292|estExt_Genewise1.C_230068	scaffold_23	0_0_CBOZ1620.b1_CBOZ_CBPA	Ot02g01760	OSTLU_119616	MICPUN_107412	MICPUCDRAFT_18521	VOLCADRAFT_88650
[KO:K03013]	---	DNA-directed RNA polymerases I, II, and III subunit RPABC1	CHLREDRAFT_151082		H632_c2414p0	contig-2414	a9133r447		jgi|ChlNC64A_1|12900|gw1.12.326.1	scaffold_12			jgi|Coc_C169_1|36652|fgenesh1_pm.8_#_52	scaffold_8	2753_1_CBOZ_CBPA	Ot04g05140	OSTLU_36865	MICPUN_98039	MICPUCDRAFT_69210	VOLCADRAFT_109457
[KO:K03014]	---	DNA-directed RNA polymerases I, II, and III subunit RPABC2	CHLREDRAFT_107215		H632_c524p1	contig-524	a5593r321		jgi|ChlNC64A_1|14375|gw1.6.265.1	scaffold_6			jgi|Coc_C169_1|36518|fgenesh1_pm.7_#_134	scaffold_7	1028_1_CBOZ_CBPA	Ot02g00410	OSTLU_8797	MICPUN_61090	MICPUCDRAFT_18346	VOLCADRAFT_106747
[KO:K03015]	---	DNA-directed RNA polymerase II subunit RPB7	CHLREDRAFT_189366		H632_c1511p1	contig-1511	a2352r120		jgi|ChlNC64A_1|31793|estExt_Genewise1.C_140294	scaffold_14	CBPS_CBWC_CBWF_0_0_CBWF5632.b1		jgi|Coc_C169_1|54126|estExt_fgenesh1_pm.C_130056	scaffold_13	3946_1_CBOZ_CBPA	Ot10g01880	OSTLU_26149, 37948	MICPUN_78358	MICPUCDRAFT_57269, 58220	VOLCADRAFT_74564
[KO:K03016]	---	DNA-directed RNA polymerases I, II, and III subunit RPABC3	CHLREDRAFT_126483		H632_c1286p2	contig-1286	a10707r216			scaffold_2	CBPS_CBWC_CBWF_922_0_CBWF6466.g1		jgi|Coc_C169_1|8970|gw1.19.303.1	scaffold_19			OSTLU_12967	MICPUN_98777		VOLCADRAFT_82285
[KO:K03017]	---	DNA-directed RNA polymerase II subunit RPB9	CHLREDRAFT_135424		H632_c1778p1	contig-1778	a6494r430		jgi|ChlNC64A_1|49046|fgenesh3_pm.C_scaffold_18000029	scaffold_18			jgi|Coc_C169_1|37322|fgenesh1_pm.12_#_65	scaffold_12			OSTLU_119611	MICPUN_51672		VOLCADRAFT_57912
[KO:K03018]	2.7.7.6	DNA-directed RNA polymerase III subunit RPC1	CHLREDRAFT_169121		H632_c771p0	contig-771	a31607r56		jgi|ChlNC64A_1|138029|IGS.gm_2_00496	scaffold_12	CBPS_CBWC_CBWF_102_0_CBWC6006.b1		jgi|Coc_C169_1|44617|fgenesh1_pg.18_#_219	scaffold_18	4803_0_CBOZ5422.b1_CBOZ_CBPA	Ot02g06220	OSTLU_24022	MICPUN_82079	MICPUCDRAFT_46863	VOLCADRAFT_81566
[KO:K03019]	---	DNA-directed RNA polymerase III subunit RPC10	CHLREDRAFT_76582			contig-1778	a352896r11		jgi|ChlNC64A_1|135086|IGS.gm_13_00014	scaffold_13			jgi|Coc_C169_1|36434|fgenesh1_pm.7_#_50	scaffold_7	2838_1_CBOZ_CBPA	Ot03g03890	OSTLU_34016	MICPUN_78504	MICPUCDRAFT_43884	VOLCADRAFT_56639
[KO:K03020]	---	DNA-directed RNA polymerases I and III subunit RPAC2	CHLREDRAFT_123383				a13450r216		jgi|ChlNC64A_1|33923|estExt_Genewise1Plus.C_20516	scaffold_4			jgi|Coc_C169_1|56503|Genemark1.5532_g	scaffold_11			OSTLU_30435	MICPUN_80643	MICPUCDRAFT_21450	VOLCADRAFT_63657
[KO:K03021]	2.7.7.6	DNA-directed RNA polymerase III subunit RPC2	CHLREDRAFT_129857		H632_c74p1	contig-3218	a7563r193		jgi|ChlNC64A_1|56318|estExt_fgenesh3_pm.C_230008	scaffold_23	CBPS_CBWC_CBWF_2084_1		jgi|Coc_C169_1|35179|fgenesh1_pm.2_#_189	scaffold_2	3318_1_CBOZ_CBPA	Ot01g06000	OSTLU_39835	MICPUN_86086	MICPUCDRAFT_22087	VOLCADRAFT_66175
[KO:K03022]	---	DNA-directed RNA polymerase III subunit RPC8	CHLREDRAFT_79435		H632_c754p1	contig-754	a8761r257		jgi|ChlNC64A_1|145291|IGS.gm_9_00098	scaffold_9			jgi|Coc_C169_1|34898|fgenesh1_pm.1_#_239	scaffold_1	3946_1_CBOZ_CBPA	Ot06g00120	OSTLU_15619	MICPUN_79748		VOLCADRAFT_74791
[KO:K03023]	---	DNA-directed RNA polymerase III subunit RPC3	CHLREDRAFT_174488				a35479r67		jgi|ChlNC64A_1|139103|IGS.gm_23_00094	scaffold_23	CBPS_CBWC_CBWF_203_0_CBWC6769.g1		jgi|Coc_C169_1|43175|fgenesh1_pg.12_#_114	scaffold_12		Ot02g00840		MICPUN_107346	MICPUCDRAFT_64484	VOLCADRAFT_89829
[KO:K03025]	---	DNA-directed RNA polymerase III subunit RPC6	CHLREDRAFT_155892		H632_c2739p0	contig-2739	a4089r420		jgi|ChlNC64A_1|48173|fgenesh3_kg.C_scaffold_5000017	scaffold_5	CBPS_CBWC_CBWF_3046_1		jgi|Coc_C169_1|35994|fgenesh1_pm.5_#_93	scaffold_5		Ot18g01360	OSTLU_42021	MICPUN_83487	MICPUCDRAFT_43793	VOLCADRAFT_118667
[KO:K03026]	---	DNA-directed RNA polymerase III subunit RPC4	CHLREDRAFT_154065			contig-4281	a60884r62		jgi|ChlNC64A_1|144796|IGS.gm_8_00124	scaffold_8			jgi|Coc_C169_1|66646|estExt_Genemark1.C_100350	scaffold_10	4818_0_CBOZ5529.g1_CBOZ_CBPA			MICPUN_55350		VOLCADRAFT_103709
[KO:K03504]	---	DNA polymerase delta subunit 3	CHLREDRAFT_190579		H632_c2919p0	contig-2919	a39572r157		jgi|ChlNC64A_1|141301|IGS.gm_33_00011				jgi|Coc_C169_1|60931|Genemark1.1742_g	scaffold_3	1169_1_CBOZ_CBPA			MICPUN_60841
[KO:K03505]	---	DNA polymerase delta subunit 4	CHLREDRAFT_185774		H632_c787p0		a54347r85		jgi|ChlNC64A_1|136929|IGS.gm_18_00035	scaffold_18			jgi|Coc_C169_1|54434|estExt_fgenesh1_pm.C_160078		728_1_CBOZ_CBPA	Ot07g02450	OSTLU_32665	MICPUN_98861	MICPUCDRAFT_57378
[KO:K03787]	3.1.3.5	5'-nucleotidase	CHLREDRAFT_144281		H632_c1980p0	contig-1980	a27719r138		jgi|ChlNC64A_1|137835|IGS.gm_2_00302	scaffold_2			jgi|Coc_C169_1|6176|gw1.10.331.1	scaffold_10				MICPUN_106294	MICPUCDRAFT_47829	VOLCADRAFT_86716
[KO:K09903]	2.7.4.22	uridylate kinase	CHLREDRAFT_141571		H632_c359p2	contig-359	a13153r129		jgi|ChlNC64A_1|141978|IGS.gm_4_00119	scaffold_4			jgi|Coc_C169_1|6024|gw1.4.551.1	scaffold_4		Ot16g01870	OSTLU_13319		MICPUCDRAFT_45939
[KO:K10807]	1.17.4.1	ribonucleoside-diphosphate reductase subunit M1	CHLREDRAFT_185583		H632_c114p0	contig-114	a3598r422		jgi|ChlNC64A_1|6534|gw1.26.15.1	scaffold_26	CBPS_CBWC_CBWF_709_1		jgi|Coc_C169_1|38039|fgenesh1_pm.17_#_68	scaffold_17	3829_1_CBOZ_CBPA	Ot01g00100	OSTLU_48569	MICPUN_93299	MICPUCDRAFT_31349	VOLCADRAFT_82353
[KO:K10808]	1.17.4.1	ribonucleoside-diphosphate reductase subunit M2	CHLREDRAFT_144621, 188785		H632_c60p0	contig-60	a12243r219		jgi|ChlNC64A_1|9969|gw1.3.246.1, |34103|estExt_Genewise1Plus.C_30356	scaffold_20, 3	CBPS_CBWC_CBWF_0_0_CBWC1270.b1		jgi|Coc_C169_1|36138|fgenesh1_pm.5_#_237, |5739|gw1.4.520.1	scaffold_4	3509_1_CBOZ_CBPA	Ot12g01290	OSTLU_32923, 39468	MICPUN_91276, 94589	MICPUCDRAFT_33344, 45157	VOLCADRAFT_101784, 109884
[KO:K13421]	2.4.2.10; 4.1.1.23	uridine monophosphate synthetase	CHLREDRAFT_116267		H632_c75p3	contig-75	a28875r132		jgi|ChlNC64A_1|53100|fgenesh3_pg.C_scaffold_14000010	scaffold_14	CBPS_CBWC_CBWF_1865_1		jgi|Coc_C169_1|37396|fgenesh1_pm.12_#_139	scaffold_12	4860_1_CBOZ_CBPA		OSTLU_19418	MICPUN_80764	MICPUCDRAFT_21243	VOLCADRAFT_80294
[KO:K13800]	2.7.4.-; 2.7.4.14	UMP-CMP kinase	CHLREDRAFT_114363, 196915		H632_c3044p0	contig-3044	a22569r203		jgi|ChlNC64A_1|141713|IGS.gm_37_00054	scaffold_37	CBPS_CBWC_CBWF_2342_1		jgi|Coc_C169_1|37309|fgenesh1_pm.12_#_52, |8135|gw1.12.393.1	scaffold_12	3904_1_CBOZ_CBPA	Ot01g04910	OSTLU_40028	MICPUN_88986	MICPUCDRAFT_70220	VOLCADRAFT_79151
[KO:K13998]	1.5.1.3; 2.1.1.45	dihydrofolate reductase / thymidylate synthase	CHLREDRAFT_139742		H632_c2296p0	contig-2296	a22198r112		jgi|ChlNC64A_1|48756|fgenesh3_pm.C_scaffold_8000027	scaffold_8	CBPS_CBWC_CBWF_632_1		jgi|Coc_C169_1|37014|fgenesh1_pm.10_#_102	scaffold_10		Ot01g05780	OSTLU_49676	MICPUN_58650	MICPUCDRAFT_56456	VOLCADRAFT_66296
[KO:K14641]	3.6.1.5	apyrase	CHLREDRAFT_167044		H632_c2261p0	contig-2261	a48421r66		jgi|ChlNC64A_1|133515|IGS.gm_1_00651	scaffold_1	CBPS_CBWC_CBWF_0_0_CBWC5146.b1		jgi|Coc_C169_1|53288|estExt_fgenesh1_pm.C_60207	scaffold_6	709_1_CBOZ_CBPA	Ot04g01290	OSTLU_36812	MICPUN_84198	MICPUCDRAFT_32900	VOLCADRAFT_78871
[KO:K14721]	---	DNA-directed RNA polymerase III subunit RPC5	CHLREDRAFT_143043		H632_c430p0	contig-430	a42418r81		jgi|ChlNC64A_1|50550|fgenesh3_pg.C_scaffold_4000049	scaffold_4			jgi|Coc_C169_1|61395|Genemark1.2185_g	scaffold_4	3269_2_CBOZ_CBPA	Ot01g02230	OSTLU_28831	MICPUN_55174	MICPUCDRAFT_55547	VOLCADRAFT_87172
00250_Alanine_aspartate_and_glutamate_metabolism
[KO:K00261]	1.4.1.3	glutamate dehydrogenase (NAD(P)+)	CHLREDRAFT_82916		H632_c370p0	contig-370	a3972r613		jgi|ChlNC64A_1|48227|fgenesh3_kg.C_scaffold_11000011	scaffold_4	CBPS_CBWC_CBWF_358_1		jgi|Coc_C169_1|36676|fgenesh1_pm.8_#_76	scaffold_8	3695_1_CBOZ_CBPA					VOLCADRAFT_63307
[KO:K00264]	1.4.1.13; 1.4.1.14	glutamate synthase (NADPH/NADH)	CHLREDRAFT_205746		H632_c5592p0	contig-4979	a158406r24		jgi|ChlNC64A_1|18677|e_gw1.1.6.1	scaffold_1	CBPS_CBWC_CBWF_1302_2		jgi|Coc_C169_1|36225|fgenesh1_pm.6_#_73	scaffold_6	2272_1_CBOZ_CBPA			MICPUN_105473	MICPUCDRAFT_57115	VOLCADRAFT_108038
[KO:K00278]	1.4.3.16	L-aspartate oxidase	CHLREDRAFT_58579		H632_c721p1	contig-721	a4666r282		jgi|ChlNC64A_1|140919|IGS.gm_3_00658	scaffold_3	CBPS_CBWC_CBWF_1681_1		jgi|Coc_C169_1|47995|estExt_fgenesh1_pg.C_110159	scaffold_11	3130_1_CBOZ_CBPA	Ot08g00810	OSTLU_24902	MICPUN_96095	MICPUCDRAFT_66855	VOLCADRAFT_75739
[KO:K00294]	1.2.1.88	1-pyrroline-5-carboxylate dehydrogenase	CHLREDRAFT_150809		H632_c1227p0	contig-1227	a3491r555		jgi|ChlNC64A_1|36795|estExt_Genewise1Plus.C_210146	scaffold_21	CBPS_CBWC_CBWF_1419_2		jgi|Coc_C169_1|38580|fgenesh1_pm.23_#_12	scaffold_23	3217_1_CBOZ_CBPA	Ot03g05840	OSTLU_30910			VOLCADRAFT_69010
[KO:K00609]	2.1.3.2	aspartate carbamoyltransferase catalytic subunit	CHLREDRAFT_31		H632_c2p1	contig-2	a35742r110		jgi|ChlNC64A_1|9562|gw1.8.128.1	scaffold_8	CBPS_CBWC_CBWF_2452_1		jgi|Coc_C169_1|24269|estExt_Genewise1.C_100240	scaffold_10	0_0_CBOZ6163.b1_CBOZ_CBPA		OSTLU_19816	MICPUN_98407	MICPUCDRAFT_19938	VOLCADRAFT_102225
[KO:K00764]	2.4.2.14	amidophosphoribosyltransferase	CHLREDRAFT_122298		H632_c836p2	contig-836	a15216r89		jgi|ChlNC64A_1|7488|gw1.2.54.1	scaffold_2	CBPS_CBWC_CBWF_643_1		jgi|Coc_C169_1|1875|gw1.2.163.1	scaffold_2	4154_1_CBOZ_CBPA	Ot12g00210	OSTLU_19754	MICPUN_109142	MICPUCDRAFT_27999	VOLCADRAFT_120418
[KO:K00811]	2.6.1.1	aspartate aminotransferase, chloroplastic	CHLREDRAFT_186959		H632_c1503p0	contig-1503	a190286r26		jgi|ChlNC64A_1|137913|IGS.gm_2_00380	scaffold_2	CBPS_CBWC_CBWF_802_1		jgi|Coc_C169_1|38638|fgenesh1_pm.24_#_7	scaffold_14	1112_1_CBOZ_CBPA			MICPUN_99771	MICPUCDRAFT_30404	VOLCADRAFT_81153
[KO:K00814]	2.6.1.2	alanine transaminase	CHLREDRAFT_191703		H632_c122p1	contig-122	a17742r237		jgi|ChlNC64A_1|48082|fgenesh3_kg.C_scaffold_1000018	scaffold_11	CBPS_CBWC_CBWF_316_1		jgi|Coc_C169_1|2904|gw1.6.134.1	scaffold_6	515_2_CBOZ_CBPA	Ot03g02840	OSTLU_30612	MICPUN_90107	MICPUCDRAFT_46391	VOLCADRAFT_120326
[KO:K00820]	2.6.1.16	glucosamine--fructose-6-phosphate aminotransferase (isomerizing)	CHLREDRAFT_118046		H632_c2794p0	contig-2794	a3771r284		jgi|ChlNC64A_1|25756|e_gw1.17.111.1	scaffold_17	CBPS_CBWC_CBWF_2170_1		jgi|Coc_C169_1|13632|e_gw1.4.114.1	scaffold_4		Ot05g04140	OSTLU_31870	MICPUN_93714	MICPUCDRAFT_25777	VOLCADRAFT_105759
[KO:K00827]	2.6.1.44; 2.6.1.40	alanine-glyoxylate transaminase / (R)-3-amino-2-methylpropionate-pyruvate transaminase	CHLREDRAFT_133057		H632_c2657p1	contig-2657	a22055r80		jgi|ChlNC64A_1|34903|estExt_Genewise1Plus.C_60254	scaffold_6	CBPS_CBWC_CBWF_1394_2		jgi|Coc_C169_1|2811|gw1.8.111.1	scaffold_8	3259_1_CBOZ_CBPA					VOLCADRAFT_79310
[KO:K00830]	2.6.1.44; 2.6.1.45; 2.6.1.51	alanine-glyoxylate transaminase / serine-glyoxylate transaminase / serine-pyruvate transaminase	CHLREDRAFT_194541, 194609		H632_c26p1	contig-26	a3926r278		jgi|ChlNC64A_1|49619|fgenesh3_pg.C_scaffold_1000317, |33615|estExt_Genewise1Plus.C_10516	scaffold_1	CBPS_CBWC_CBWF_2892_1, _1333_1		jgi|Coc_C169_1|47174|estExt_fgenesh1_pg.C_60263, |36307|fgenesh1_pm.6_#_155	scaffold_6	3302_1_CBOZ_CBPA, 3187_0_CBOZ2100.b1_CBOZ_CBPA					VOLCADRAFT_74092, 75980
[KO:K01755]	4.3.2.1	argininosuccinate lyase	CHLREDRAFT_101662		H632_c1096p1	contig-1096	a38105r106		jgi|ChlNC64A_1|8405|gw1.23.50.1	scaffold_23	CBPS_CBWC_CBWF_455_1		jgi|Coc_C169_1|36889|fgenesh1_pm.9_#_146	scaffold_9	2954_1_CBOZ_CBPA	Ot12g03000	OSTLU_26950	MICPUN_79415	MICPUCDRAFT_12633	VOLCADRAFT_102036
[KO:K01915]	6.3.1.2	glutamine synthetase	CHLREDRAFT_129468, 133971, 136895		H632_c1293p0	contig-1293	a12412r254		jgi|ChlNC64A_1|143431|IGS.gm_6_00005, |48539|fgenesh3_pm.C_scaffold_3000039	scaffold_3	CBPS_CBWC_CBWF_556_1		jgi|Coc_C169_1|63040|Genemark1.3823_g, |4237|gw1.6.190.1	scaffold_7, 6	207_1_, 764_1_CBOZ_CBPA	Ot01g04890	OSTLU_39960	MICPUN_112708, 113822, 58286	MICPUCDRAFT_30309, 4228, 55724	VOLCADRAFT_103492, 77041
[KO:K01939]	6.3.4.4	adenylosuccinate synthase	CHLREDRAFT_196727		H632_c2280p0	contig-2280	a9609r238		jgi|ChlNC64A_1|144822|IGS.gm_8_00150	scaffold_8	CBPS_CBWC_CBWF_3673_0_CBWC7800.g1		jgi|Coc_C169_1|3375|gw1.10.168.1	scaffold_10	4652_0_CBOZ3875.b1_CBOZ_CBPA	Ot06g00630	OSTLU_19549	MICPUN_97107	MICPUCDRAFT_47447	VOLCADRAFT_105550
[KO:K01940]	6.3.4.5	argininosuccinate synthase	CHLREDRAFT_58140		H632_c2882p0	contig-2882	a4688r210		jgi|ChlNC64A_1|52216|fgenesh3_pg.C_scaffold_10000001	scaffold_10			jgi|Coc_C169_1|3144|gw1.24.23.1	scaffold_24	4955_0_CBOZ6794.b1_CBOZ_CBPA	Ot16g02920	OSTLU_19853	MICPUN_64373	MICPUCDRAFT_45942	VOLCADRAFT_104718
[KO:K01953]	6.3.5.4	asparagine synthase (glutamine-hydrolysing)	CHLREDRAFT_140252		H632_c155p1	contig-155	a7515r312		jgi|ChlNC64A_1|134619|IGS.gm_12_00005	scaffold_12	CBPS_CBWC_CBWF_368_1		jgi|Coc_C169_1|1654|gw1.1.164.1	scaffold_1	1619_0_CBOZ5130.b1_CBOZ_CBPA	Ot03g01250	OSTLU_45116	MICPUN_100000	MICPUCDRAFT_21388	VOLCADRAFT_65699
[KO:K01955]	6.3.5.5	carbamoyl-phosphate synthase large subunit	CHLREDRAFT_195255		H632_c544p0	contig-544	a5874r213		jgi|ChlNC64A_1|58986|estExt_fgenesh3_pg.C_240034	scaffold_24	CBPS_CBWC_CBWF_36_2		jgi|Coc_C169_1|37654|fgenesh1_pm.14_#_88	scaffold_14	1048_1_CBOZ_CBPA	Ot08g02450	OSTLU_42572	MICPUN_104797	MICPUCDRAFT_16722	VOLCADRAFT_77870
[KO:K01956]	6.3.5.5	carbamoyl-phosphate synthase small subunit	CHLREDRAFT_128227		H632_c88p1	contig-88	a81953r70		jgi|ChlNC64A_1|137867|IGS.gm_2_00334	scaffold_2	CBPS_CBWC_CBWF_2063_1		jgi|Coc_C169_1|3546|gw1.22.67.1	scaffold_22	4059_1_CBOZ_CBPA		OSTLU_28074	MICPUN_105618	MICPUCDRAFT_46001	VOLCADRAFT_81499
[KO:K14272]	2.6.1.4; 2.6.1.2; 2.6.1.44; 2.6.1.-	glutamate--glyoxylate aminotransferase	CHLREDRAFT_206184		H632_c122p1	contig-122	a21828r172		jgi|ChlNC64A_1|134215|IGS.gm_11_00061	scaffold_11	CBPS_CBWC_CBWF_316_1		jgi|Coc_C169_1|34805|fgenesh1_pm.1_#_146	scaffold_1	515_2_CBOZ_CBPA					VOLCADRAFT_73258
[KO:K14454]	2.6.1.1	aspartate aminotransferase, cytoplasmic	CHLREDRAFT_174097		H632_c1503p0	contig-1503	a6744r266		jgi|ChlNC64A_1|59142|estExt_fgenesh3_pg.C_270006	scaffold_2	CBPS_CBWC_CBWF_2147_1		jgi|Coc_C169_1|38233|fgenesh1_pm.19_#_55	scaffold_19	1112_1_CBOZ_CBPA					VOLCADRAFT_82929
[KO:K14455]	2.6.1.1	aspartate aminotransferase, mitochondrial	CHLREDRAFT_126943		H632_c1503p0	contig-1503	a6744r266		jgi|ChlNC64A_1|54903|fgenesh3_pg.C_scaffold_27000007	scaffold_2	CBPS_CBWC_CBWF_2147_1		jgi|Coc_C169_1|2107|gw1.14.65.1	scaffold_14	1112_1_CBOZ_CBPA	Ot05g01290	OSTLU_31597
00260_Glycine_serine_and_threonine_metabolism
[KO:K00058]	1.1.1.95	D-3-phosphoglycerate dehydrogenase	CHLREDRAFT_136279, 162449, 78757		H632_c705p0	contig-705	a1290r507		jgi|ChlNC64A_1|7001|gw1.1.67.1, |16368|gw1.1.627.1, |49336|fgenesh3_pg.C_scaffold_1000034	scaffold_1	CBPS_CBWC_CBWF_1260_1		jgi|Coc_C169_1|23857|estExt_Genewise1.C_80381, |14152|e_gw1.5.90.1	scaffold_8, 5	3871_1_CBOZ_CBPA	Ot05g01370	OSTLU_39000	MICPUN_55222	MICPUCDRAFT_14394	VOLCADRAFT_107347, 60404
[KO:K00130]	1.2.1.8	betaine-aldehyde dehydrogenase	CHLREDRAFT_24394		H632_c1464p0	contig-1464	a16775r225		jgi|ChlNC64A_1|133364|IGS.gm_1_00500	scaffold_1	CBPS_CBWC_CBWF_3033_1		jgi|Coc_C169_1|18244|e_gw1.14.111.1	scaffold_14	1093_1_CBOZ_CBPA	Ot10g02210	OSTLU_50750		MICPUCDRAFT_23534	VOLCADRAFT_73155
[KO:K00133]	1.2.1.11	aspartate-semialdehyde dehydrogenase	CHLREDRAFT_148810		H632_c1362p1	contig-1362	a45422r84		jgi|ChlNC64A_1|134577|IGS.gm_11_00423	scaffold_11	CBPS_CBWC_CBWF_1291_1		jgi|Coc_C169_1|4416|gw1.8.182.1	scaffold_8	4061_1_CBOZ_CBPA	Ot01g02440	OSTLU_28856	MICPUN_51542	MICPUCDRAFT_31546	VOLCADRAFT_121504
[KO:K00274]	1.4.3.4	monoamine oxidase	CHLREDRAFT_187700																	VOLCADRAFT_60905
[KO:K00276]	1.4.3.21	primary-amine oxidase	CHLREDRAFT_176519, 178662				a50011r54		jgi|ChlNC64A_1|49652|fgenesh3_pg.C_scaffold_1000350	scaffold_12	CBPS_CBWC_CBWF_834_1, _834_0_CBPS632.b1		jgi|Coc_C169_1|33265|fgenesh1_kg.8_#_67_#_561_1_CBOZ_CBPA, |1298|gw1.8.55.1	scaffold_5, 8	561_1_CBOZ_CBPA			MICPUN_56524		VOLCADRAFT_84774
[KO:K00281]	1.4.4.2	glycine dehydrogenase	CHLREDRAFT_136984		H632_c2212p0	contig-2212	a2038r172		jgi|ChlNC64A_1|142145|IGS.gm_4_00286	scaffold_4	CBPS_CBWC_CBWF_3969_0_CBWF6461.g1		jgi|Coc_C169_1|35686|fgenesh1_pm.4_#_88	scaffold_4			OSTLU_26284	MICPUN_104877	MICPUCDRAFT_24398	VOLCADRAFT_107448
[KO:K00382]	1.8.1.4	dihydrolipoamide dehydrogenase	CHLREDRAFT_205763, 57890		H632_c2312p0, c1169p1	contig-2312, 1169	a41914r109, a11039r490		jgi|ChlNC64A_1|36173|estExt_Genewise1Plus.C_140425, |48339|fgenesh3_kg.C_scaffold_26000016	scaffold_14, 26	CBPS_CBWC_CBWF_887_1, _548_1		jgi|Coc_C169_1|52481|estExt_fgenesh1_pm.C_20269, |38031|fgenesh1_pm.17_#_60	scaffold_2, 17	2430_1_, 2338_1_CBOZ_CBPA	Ot04g05070, Ot11g03020	OSTLU_15203, 26614	MICPUN_104967, 104984	MICPUCDRAFT_28757, 34732	VOLCADRAFT_83716, 95813
[KO:K00600]	2.1.2.1	glycine hydroxymethyltransferase	CHLREDRAFT_194461, 196354, 196400		H632_c163p2, c308p2, c2333p0	contig-163, 308, 2333	a5948r357		jgi|ChlNC64A_1|37570|estExt_Genewise1Plus.C_350040, |49690|fgenesh3_pg.C_scaffold_1000388, |35692|estExt_Genewise1Plus.C_120034	scaffold_12	CBPS_CBWC_CBWF_707_1		jgi|Coc_C169_1|54763|estExt_fgenesh1_pm.C_200077, |36016|fgenesh1_pm.5_#_115, |2333|gw1.20.61.1	scaffold_20, 5	1471_1_CBOZ_CBPA	Ot03g00910, Ot14g02820	OSTLU_29554, 30421, 37794	MICPUN_104794, 63428, 96092	MICPUCDRAFT_29249, 49634, 49729	VOLCADRAFT_72779, 81312, 84741
[KO:K00605]	2.1.2.10	aminomethyltransferase	CHLREDRAFT_196242		H632_c2816p0	contig-2816	a18688r212		jgi|ChlNC64A_1|48182|fgenesh3_kg.C_scaffold_6000004	scaffold_6	CBPS_CBWC_CBWF_2569_1		jgi|Coc_C169_1|47327|estExt_fgenesh1_pg.C_70142	scaffold_7	3621_2_CBOZ_CBPA	Ot10g02850	OSTLU_26241	MICPUN_59804		VOLCADRAFT_107582
[KO:K00827]	2.6.1.44; 2.6.1.40	alanine-glyoxylate transaminase / (R)-3-amino-2-methylpropionate-pyruvate transaminase	CHLREDRAFT_133057		H632_c2657p1	contig-2657	a22055r80		jgi|ChlNC64A_1|34903|estExt_Genewise1Plus.C_60254	scaffold_6	CBPS_CBWC_CBWF_1394_2		jgi|Coc_C169_1|2811|gw1.8.111.1	scaffold_8	3259_1_CBOZ_CBPA					VOLCADRAFT_79310
[KO:K00830]	2.6.1.44; 2.6.1.45; 2.6.1.51	alanine-glyoxylate transaminase / serine-glyoxylate transaminase / serine-pyruvate transaminase	CHLREDRAFT_194541, 194609		H632_c26p1	contig-26	a3926r278		jgi|ChlNC64A_1|49619|fgenesh3_pg.C_scaffold_1000317, |33615|estExt_Genewise1Plus.C_10516	scaffold_1	CBPS_CBWC_CBWF_2892_1, _1333_1		jgi|Coc_C169_1|47174|estExt_fgenesh1_pg.C_60263, |36307|fgenesh1_pm.6_#_155	scaffold_6	3302_1_CBOZ_CBPA, 3187_0_CBOZ2100.b1_CBOZ_CBPA					VOLCADRAFT_74092, 75980
[KO:K00831]	2.6.1.52	phosphoserine aminotransferase	CHLREDRAFT_188476		H632_c24p3	contig-24	a9294r472		jgi|ChlNC64A_1|142929|IGS.gm_5_00258	scaffold_5	CBPS_CBWC_CBWF_2611_1		jgi|Coc_C169_1|42683|fgenesh1_pg.10_#_186	scaffold_10	4753_0_CBOZ4939.b1_CBOZ_CBPA	Ot03g03290	OSTLU_12357	MICPUN_93571	MICPUCDRAFT_24522	VOLCADRAFT_81234
[KO:K00872]	2.7.1.39	homoserine kinase	CHLREDRAFT_196926			contig-646	a83362r37		jgi|ChlNC64A_1|51933|fgenesh3_pg.C_scaffold_8000220	scaffold_8			jgi|Coc_C169_1|5397|gw1.2.446.1	scaffold_2			OSTLU_10263	MICPUN_60458	MICPUCDRAFT_5371	VOLCADRAFT_94379
[KO:K00928]	2.7.2.4	aspartate kinase	CHLREDRAFT_161455		H632_c2711p0	contig-2711	a108922r36		jgi|ChlNC64A_1|134660|IGS.gm_12_00046	scaffold_12	CBPS_CBWC_CBWF_8_32		jgi|Coc_C169_1|12569|e_gw1.3.145.1	scaffold_3		Ot01g01590	OSTLU_44504	MICPUN_77518	MICPUCDRAFT_58461	VOLCADRAFT_87637
[KO:K01079]	3.1.3.3	phosphoserine phosphatase	CHLREDRAFT_194322		H632_c1681p1	contig-1681	a36059r88		jgi|ChlNC64A_1|143313|IGS.gm_5_00642	scaffold_5			jgi|Coc_C169_1|54698|estExt_fgenesh1_pm.C_190105	scaffold_19	1509_1_CBOZ_CBPA	Ot07g03770	OSTLU_16249	MICPUN_82734	MICPUCDRAFT_19830	VOLCADRAFT_60933, 88690
[KO:K01695]	4.2.1.20	tryptophan synthase alpha chain	CHLREDRAFT_81238		H632_c4264p0	contig-4264	a21884r90		jgi|ChlNC64A_1|48138|fgenesh3_kg.C_scaffold_4000006	scaffold_4	CBPS_CBWC_CBWF_2164_1		jgi|Coc_C169_1|61629|Genemark1.2419_g	scaffold_4		Ot04g00330	OSTLU_49484	MICPUN_79000	MICPUCDRAFT_35499	VOLCADRAFT_105923
[KO:K01696]	4.2.1.20	tryptophan synthase beta chain	CHLREDRAFT_9823		H632_c2216p0	contig-2216	a10261r163		jgi|ChlNC64A_1|49143|fgenesh3_pm.C_scaffold_25000004	scaffold_25	CBPS_CBWC_CBWF_1293_0_CBWF1768.g1		jgi|Coc_C169_1|38053|fgenesh1_pm.18_#_6	scaffold_18	3699_1_CBOZ_CBPA	Ot07g02680	OSTLU_32688	MICPUN_93438	MICPUCDRAFT_33061	VOLCADRAFT_109912
[KO:K01733]	4.2.3.1	threonine synthase	CHLREDRAFT_127384		H632_c646p2	contig-646	a10936r380		jgi|ChlNC64A_1|48759|fgenesh3_pm.C_scaffold_8000030	scaffold_8	CBPS_CBWC_CBWF_726_1		jgi|Coc_C169_1|44605|fgenesh1_pg.18_#_207	scaffold_18	2380_1_CBOZ_CBPA	Ot04g01610, Ot06g04190	OSTLU_32331, 37018	MICPUN_60673	MICPUCDRAFT_45441	VOLCADRAFT_103465
[KO:K01754]	4.3.1.19	threonine dehydratase	CHLREDRAFT_196595		H632_c268p0	contig-268	a57580r51		jgi|ChlNC64A_1|25383|e_gw1.15.25.1	scaffold_15	CBPS_CBWC_CBWF_2795_1		jgi|Coc_C169_1|1294|gw1.9.58.1	scaffold_9	4712_0_CBOZ4576.g1_CBOZ_CBPA	Ot05g02850, Ot12g01590	OSTLU_39224	MICPUN_54333, 81963	MICPUCDRAFT_14650, 63278	VOLCADRAFT_88765
[KO:K01834]	5.4.2.11	2,3-bisphosphoglycerate-dependent phosphoglycerate mutase	CHLREDRAFT_99328																	VOLCADRAFT_96867
[KO:K12235]	5.1.1.18	serine racemase	CHLREDRAFT_24355		H632_c3550p0	contig-4040	a95229r38		jgi|ChlNC64A_1|10112|gw1.12.185.1	scaffold_12			jgi|Coc_C169_1|35202|fgenesh1_pm.2_#_212	scaffold_2	0_0_CBOZ7596.b1_CBOZ_CBPA			MICPUN_86447	MICPUCDRAFT_34565	VOLCADRAFT_127331
[KO:K12524]	2.7.2.4; 1.1.1.3	bifunctional aspartokinase / homoserine dehydrogenase 1	CHLREDRAFT_196925		H632_c1182p0	contig-1182	a54308r58		jgi|ChlNC64A_1|144479|IGS.gm_7_00421	scaffold_383	CBPS_CBWC_CBWF_976_1		jgi|Coc_C169_1|19495|e_gw1.18.11.1	scaffold_18	4401_0_CBOZ10591.b1_CBOZ_CBPA	Ot09g03610	OSTLU_16870	MICPUN_88465	MICPUCDRAFT_32181	VOLCADRAFT_73076
[KO:K14272]	2.6.1.4; 2.6.1.2; 2.6.1.44; 2.6.1.-	glutamate--glyoxylate aminotransferase	CHLREDRAFT_206184		H632_c122p1	contig-122	a21828r172		jgi|ChlNC64A_1|134215|IGS.gm_11_00061	scaffold_11	CBPS_CBWC_CBWF_316_1		jgi|Coc_C169_1|34805|fgenesh1_pm.1_#_146	scaffold_1	515_2_CBOZ_CBPA					VOLCADRAFT_73258
[KO:K15633]	5.4.2.12	2,3-bisphosphoglycerate-independent phosphoglycerate mutase	CHLREDRAFT_196305		H632_c319p1	contig-319	a23118r78		jgi|ChlNC64A_1|32045|estExt_Genewise1.C_160124	scaffold_16	CBPS_CBWC_CBWF_1597_0_CBWF1574.g1		jgi|Coc_C169_1|16738|e_gw1.10.92.1	scaffold_10	3241_1_CBOZ_CBPA	Ot08g02410	OSTLU_33106	MICPUN_96333	MICPUCDRAFT_26927	VOLCADRAFT_108845, 71079
[KO:K15634]	5.4.2.12	probable phosphoglycerate mutase	CHLREDRAFT_21373, 8761						jgi|ChlNC64A_1|134218|IGS.gm_11_00064	scaffold_11			jgi|Coc_C169_1|14251|e_gw1.5.202.1, |15989|e_gw1.8.331.1	scaffold_5		Ot07g03920	OSTLU_35517	MICPUN_50990, 79152	MICPUCDRAFT_41868	VOLCADRAFT_108568, 93926
[KO:K15893]	---	hydroxypyruvate reductase 1	CHLREDRAFT_128310		H632_c469p0	contig-469	a175100r21		jgi|ChlNC64A_1|33618|estExt_Genewise1Plus.C_10523	scaffold_1	CBPS_CBWC_CBWF_1882_1		jgi|Coc_C169_1|3854|gw1.6.164.1	scaffold_6	5130_0_CBOZ9865.b1_CBOZ_CBPA					VOLCADRAFT_89593
[KO:K15918]	2.7.1.31	D-glycerate 3-kinase	CHLREDRAFT_196366		H632_c3516p0	contig-3516	a25217r107		jgi|ChlNC64A_1|57258|estExt_fgenesh3_pg.C_50175	scaffold_5	CBPS_CBWC_CBWF_61_1		jgi|Coc_C169_1|37030|fgenesh1_pm.10_#_118	scaffold_10	1205_1_CBOZ_CBPA	Ot06g02040	OSTLU_41282	MICPUN_96229	MICPUCDRAFT_44766	VOLCADRAFT_94435
00270_Cysteine_and_methionine_metabolism
[KO:K00133]	1.2.1.11	aspartate-semialdehyde dehydrogenase	CHLREDRAFT_148810		H632_c1362p1	contig-1362	a45422r84		jgi|ChlNC64A_1|134577|IGS.gm_11_00423	scaffold_11	CBPS_CBWC_CBWF_1291_1		jgi|Coc_C169_1|4416|gw1.8.182.1	scaffold_8	4061_1_CBOZ_CBPA	Ot01g02440	OSTLU_28856	MICPUN_51542	MICPUCDRAFT_31546	VOLCADRAFT_121504
[KO:K00456]	1.13.11.20	cysteine dioxygenase	CHLREDRAFT_143892		H632_c3057p0	contig-3057	a1104r2352		jgi|ChlNC64A_1|142389|IGS.gm_4_00530	scaffold_4	CBPS_CBWC_CBWF_2986_1									VOLCADRAFT_103087
[KO:K00548]	2.1.1.13	5-methyltetrahydrofolate--homocysteine methyltransferase	CHLREDRAFT_76715		H632_c16p2	contig-16	a46488r43		jgi|ChlNC64A_1|49110|fgenesh3_pm.C_scaffold_23000011	scaffold_212	CBPS_CBWC_CBWF_231_1					Ot03g04540	OSTLU_45056	MICPUN_105867	MICPUCDRAFT_45154
[KO:K00558]	2.1.1.37	DNA (cytosine-5)-methyltransferase 1	CHLREDRAFT_112308, 15852, 205478, 8793		H632_c72p3	contig-72	a97715r30		jgi|ChlNC64A_1|16380|gw1.2.544.1, |33779|estExt_Genewise1Plus.C_20151	scaffold_2	CBPS_CBWC_CBWF_1806_1		jgi|Coc_C169_1|790|gw1.24.4.1, |38672|fgenesh1_pm.24_#_41	scaffold_24				MICPUN_55779		VOLCADRAFT_104541
[KO:K00640]	2.3.1.30	serine O-acetyltransferase	CHLREDRAFT_205984, 205985		H632_c231p2, c785p1	contig-231, 785	a14832r148, a5446r271		jgi|ChlNC64A_1|10994|gw1.24.142.1, |134202|IGS.gm_11_00048	scaffold_11	CBPS_CBWC_CBWF_1440_1, _0_0_CBWF6382.b1		jgi|Coc_C169_1|5040|gw1.4.458.1, |13649|e_gw1.4.458.1	scaffold_4	3285_1_CBOZ_CBPA	Ot07g04550	OSTLU_5580, 87889	MICPUN_76256, 96480	MICPUCDRAFT_23038, 30855	VOLCADRAFT_105655, 74427
[KO:K00789]	2.5.1.6	S-adenosylmethionine synthetase	CHLREDRAFT_182408		H632_c238p0	contig-238	a1812r1711		jgi|ChlNC64A_1|145246|IGS.gm_9_00053	scaffold_9			jgi|Coc_C169_1|4142|gw1.1.365.1	scaffold_1	2256_1_CBOZ_CBPA	Ot15g00960	OSTLU_27381, 47517	MICPUN_109618	MICPUCDRAFT_49687
[KO:K00797]	2.5.1.16	spermidine synthase	CHLREDRAFT_206050, 206069		H632_c251p1	contig-251	a20338r102		jgi|ChlNC64A_1|49023|fgenesh3_pm.C_scaffold_18000006, |26078|e_gw1.18.163.1	scaffold_18			jgi|Coc_C169_1|36900|fgenesh1_pm.9_#_157, |34920|fgenesh1_pm.1_#_261	scaffold_9, 1	268_1_, 3032_2_CBOZ_CBPA	Ot06g00700, Ot11g01200	OSTLU_26437, 40897	MICPUN_106331, 80273	MICPUCDRAFT_45807, 49612	VOLCADRAFT_55771, 76291
[KO:K00811]	2.6.1.1	aspartate aminotransferase, chloroplastic	CHLREDRAFT_186959		H632_c1503p0	contig-1503	a190286r26		jgi|ChlNC64A_1|137913|IGS.gm_2_00380	scaffold_2	CBPS_CBWC_CBWF_802_1		jgi|Coc_C169_1|38638|fgenesh1_pm.24_#_7	scaffold_14	1112_1_CBOZ_CBPA			MICPUN_99771	MICPUCDRAFT_30404	VOLCADRAFT_81153
[KO:K00899]	2.7.1.100	5-methylthioribose kinase	CHLREDRAFT_118729		H632_c2003p0	contig-2003	a102422r30		jgi|ChlNC64A_1|50352|fgenesh3_pg.C_scaffold_3000225	scaffold_3			jgi|Coc_C169_1|14567|e_gw1.6.171.1	scaffold_6		Ot07g02130	OSTLU_3520	MICPUN_54121	MICPUCDRAFT_57554	VOLCADRAFT_42791
[KO:K00928]	2.7.2.4	aspartate kinase	CHLREDRAFT_161455		H632_c2711p0	contig-2711	a108922r36		jgi|ChlNC64A_1|134660|IGS.gm_12_00046	scaffold_12	CBPS_CBWC_CBWF_8_32		jgi|Coc_C169_1|12569|e_gw1.3.145.1	scaffold_3		Ot01g01590	OSTLU_44504	MICPUN_77518	MICPUCDRAFT_58461	VOLCADRAFT_87637
[KO:K01011]	2.8.1.1; 2.8.1.2	thiosulfate/3-mercaptopyruvate sulfurtransferase	CHLREDRAFT_132010		H632_c323p2	contig-323	a32771r76		jgi|ChlNC64A_1|49145|fgenesh3_pm.C_scaffold_25000006	scaffold_37	CBPS_CBWC_CBWF_2175_1		jgi|Coc_C169_1|20283|e_gw1.21.139.1	scaffold_21	613_1_CBOZ_CBPA	Ot15g00100	OSTLU_13229	MICPUN_70956	MICPUCDRAFT_4297
[KO:K01244]	3.2.2.16	5'-methylthioadenosine nucleosidase	CHLREDRAFT_135128		H632_c472p1	contig-472	a1078r463		jgi|ChlNC64A_1|26505|e_gw1.20.106.1	scaffold_20			jgi|Coc_C169_1|44600|fgenesh1_pg.18_#_202	scaffold_18		Ot10g02700	OSTLU_26221	MICPUN_59971	MICPUCDRAFT_46284	VOLCADRAFT_109917
[KO:K01251]	3.3.1.1	adenosylhomocysteinase	CHLREDRAFT_129593		H632_c375p0	contig-375	a1724r1396		jgi|ChlNC64A_1|37522|estExt_Genewise1Plus.C_320125	scaffold_32	CBPS_CBWC_CBWF_8_0_CBWF2320.b1		jgi|Coc_C169_1|38482|fgenesh1_pm.21_#_63	scaffold_21		Ot09g02640	OSTLU_34856	MICPUN_64117	MICPUCDRAFT_32138	VOLCADRAFT_74602
[KO:K01611]	4.1.1.50	S-adenosylmethionine decarboxylase	CHLREDRAFT_183928		H632_c862p0	contig-862	a4201r137				CBPS_CBWC_CBWF_682_1		jgi|Coc_C169_1|38662|fgenesh1_pm.24_#_31	scaffold_24	3162_2_CBOZ_CBPA	Ot13g00890				VOLCADRAFT_84198
[KO:K01738]	2.5.1.47	cysteine synthase A	CHLREDRAFT_175651, 189320, 196485, 196886		H632_c1050p0, c576p0	contig-1050, 576	a26465r185, a30441r47		jgi|ChlNC64A_1|142080|IGS.gm_4_00221, |139772|IGS.gm_26_00125, |18833|e_gw1.2.593.1	scaffold_26, 2	CBPS_CBWC_CBWF_1504_1, _712_1, _712_2		jgi|Coc_C169_1|46638|estExt_fgenesh1_pg.C_40174, |35350|fgenesh1_pm.3_#_25, |37617|fgenesh1_pm.14_#_51, |54270|estExt_fgenesh1_pm.C_140118	scaffold_14	3370_1_, 2871_1_CBOZ_CBPA	Ot06g04880, Ot12g03090	OSTLU_26961, 41218	MICPUN_105187, 96933	MICPUCDRAFT_22529, 31117	VOLCADRAFT_108440, 58530, 79370, 89892
[KO:K01739]	2.5.1.48	cystathionine gamma-synthase	CHLREDRAFT_24268		H632_c3287p0	contig-3287	a24027r118		jgi|ChlNC64A_1|24830|e_gw1.14.83.1	scaffold_14	CBPS_CBWC_CBWF_453_1		jgi|Coc_C169_1|3395|gw1.2.284.1	scaffold_2	3624_2_CBOZ_CBPA	Ot09g01000	OSTLU_17120, 33390	MICPUN_98339	MICPUCDRAFT_25455	VOLCADRAFT_75793
[KO:K01760]	4.4.1.8	cystathionine beta-lyase	CHLREDRAFT_196483		H632_c5p1	contig-5	a45630r67		jgi|ChlNC64A_1|140666|IGS.gm_3_00405	scaffold_3	CBPS_CBWC_CBWF_453_1		jgi|Coc_C169_1|37091|fgenesh1_pm.10_#_179	scaffold_10	2432_1_CBOZ_CBPA	Ot09g02610	OSTLU_88245	MICPUN_96733	MICPUCDRAFT_2994	VOLCADRAFT_68235
[KO:K08963]	5.3.1.23	methylthioribose-1-phosphate isomerase	CHLREDRAFT_149134			contig-65	a44688r70		jgi|ChlNC64A_1|19813|e_gw1.3.707.1	scaffold_3			jgi|Coc_C169_1|5162|gw1.6.222.1	scaffold_6			OSTLU_35743			VOLCADRAFT_59470
[KO:K08967]	1.13.11.53; 1.13.11.54	1,2-dihydroxy-3-keto-5-methylthiopentene dioxygenase	CHLREDRAFT_137265		H632_c2015p0	contig-2015	a6296r807		jgi|ChlNC64A_1|19890|e_gw1.3.371.1	scaffold_3			jgi|Coc_C169_1|35187|fgenesh1_pm.2_#_197	scaffold_2	1627_1_CBOZ_CBPA					VOLCADRAFT_106957
[KO:K12524]	2.7.2.4; 1.1.1.3	bifunctional aspartokinase / homoserine dehydrogenase 1	CHLREDRAFT_196925		H632_c1182p0	contig-1182	a54308r58		jgi|ChlNC64A_1|144479|IGS.gm_7_00421	scaffold_383	CBPS_CBWC_CBWF_976_1		jgi|Coc_C169_1|19495|e_gw1.18.11.1	scaffold_18	4401_0_CBOZ10591.b1_CBOZ_CBPA	Ot09g03610	OSTLU_16870	MICPUN_88465	MICPUCDRAFT_32181	VOLCADRAFT_73076
[KO:K14454]	2.6.1.1	aspartate aminotransferase, cytoplasmic	CHLREDRAFT_174097		H632_c1503p0	contig-1503	a6744r266		jgi|ChlNC64A_1|59142|estExt_fgenesh3_pg.C_270006	scaffold_2	CBPS_CBWC_CBWF_2147_1		jgi|Coc_C169_1|38233|fgenesh1_pm.19_#_55	scaffold_19	1112_1_CBOZ_CBPA					VOLCADRAFT_82929
[KO:K14455]	2.6.1.1	aspartate aminotransferase, mitochondrial	CHLREDRAFT_126943		H632_c1503p0	contig-1503	a6744r266		jgi|ChlNC64A_1|54903|fgenesh3_pg.C_scaffold_27000007	scaffold_2	CBPS_CBWC_CBWF_2147_1		jgi|Coc_C169_1|2107|gw1.14.65.1	scaffold_14	1112_1_CBOZ_CBPA	Ot05g01290	OSTLU_31597
00280_Valine_leucine_and_isoleucine_degradation
[KO:K00128]	1.2.1.3	aldehyde dehydrogenase (NAD+)	CHLREDRAFT_135609		H632_c1464p0	contig-1464	a16775r225		jgi|ChlNC64A_1|7731|gw1.1.111.1	scaffold_1	CBPS_CBWC_CBWF_498_1		jgi|Coc_C169_1|2147|gw1.23.34.1	scaffold_23	1093_1_CBOZ_CBPA	Ot01g04160	OSTLU_13873	MICPUN_113300	MICPUCDRAFT_55745	VOLCADRAFT_73567
[KO:K00140]	1.2.1.18; 1.2.1.27	malonate-semialdehyde dehydrogenase (acetylating) / methylmalonate-semialdehyde dehydrogenase	CHLREDRAFT_130434		H632_c2218p0	contig-2218	a9793r275		jgi|ChlNC64A_1|51901|fgenesh3_pg.C_scaffold_8000188	scaffold_8	CBPS_CBWC_CBWF_0_0_CBWF5994.b1		jgi|Coc_C169_1|42781|fgenesh1_pg.10_#_284	scaffold_10	3538_2_CBOZ_CBPA					VOLCADRAFT_59269
[KO:K00166]	1.2.4.4	2-oxoisovalerate dehydrogenase E1 component, alpha subunit	CHLREDRAFT_102917		H632_c449p1	contig-449	a30908r199		jgi|ChlNC64A_1|16632|gw1.7.317.1	scaffold_7	CBPS_CBWC_CBWF_2495_1		jgi|Coc_C169_1|57198|Genemark1.6227_g	scaffold_14	0_0_CBOZ4439.b1_CBOZ_CBPA					VOLCADRAFT_42256
[KO:K00249]	1.3.8.7	acyl-CoA dehydrogenase	CHLREDRAFT_118751		H632_c2446p0	contig-4942	a110980r25		jgi|ChlNC64A_1|26769|e_gw1.22.13.1	scaffold_22			jgi|Coc_C169_1|664|gw1.5.40.1	scaffold_5
[KO:K00253]	1.3.8.4	isovaleryl-CoA dehydrogenase	CHLREDRAFT_128289		H632_c4243p0	contig-4243	a11845r321		jgi|ChlNC64A_1|48925|fgenesh3_pm.C_scaffold_13000015	scaffold_26	CBPS_CBWC_CBWF_1513_2		jgi|Coc_C169_1|53625|estExt_fgenesh1_pm.C_90065	scaffold_9	3616_1_CBOZ_CBPA					VOLCADRAFT_59964
[KO:K00382]	1.8.1.4	dihydrolipoamide dehydrogenase	CHLREDRAFT_205763, 57890		H632_c2312p0, c1169p1	contig-2312, 1169	a41914r109, a11039r490		jgi|ChlNC64A_1|36173|estExt_Genewise1Plus.C_140425, |48339|fgenesh3_kg.C_scaffold_26000016	scaffold_14, 26	CBPS_CBWC_CBWF_887_1, _548_1		jgi|Coc_C169_1|52481|estExt_fgenesh1_pm.C_20269, |38031|fgenesh1_pm.17_#_60	scaffold_2, 17	2430_1_, 2338_1_CBOZ_CBPA	Ot04g05070, Ot11g03020	OSTLU_15203, 26614	MICPUN_104967, 104984	MICPUCDRAFT_28757, 34732	VOLCADRAFT_83716, 95813
[KO:K00626]	2.3.1.9	acetyl-CoA C-acetyltransferase	CHLREDRAFT_118204		H632_c3387p0	contig-3387	a991r574		jgi|ChlNC64A_1|56332|estExt_fgenesh3_pm.C_240017	scaffold_24	CBPS_CBWC_CBWF_2185_1		jgi|Coc_C169_1|4417|gw1.11.146.1	scaffold_11	149_1_CBOZ_CBPA					VOLCADRAFT_75176, 84837
[KO:K00826]	2.6.1.42	branched-chain amino acid aminotransferase	CHLREDRAFT_187392, 206169, 30522		H632_c1787p0, c2893p0	contig-1787, 1447	a48799r35, a3762r98		jgi|ChlNC64A_1|137805|IGS.gm_2_00272, |135272|IGS.gm_13_00200	scaffold_2, 13	CBPS_CBWC_CBWF_0_0_CBWC8043.b1, _3712_0_CBWC943.g1		jgi|Coc_C169_1|4913|gw1.1.425.1, |3754|gw1.1.327.1, |30871|estExt_Genewise1Plus.C_160313	scaffold_1, 16	1045_1_CBOZ_CBPA, 892_0_, 1811_0_CBOZ7269.g1_CBOZ_CBPA	Ot04g04970, Ot08g02190, Ot14g01920	OSTLU_31397, 33086, 43558	MICPUN_106230, 87938	MICPUCDRAFT_47963, 49600, 65271	VOLCADRAFT_102054, 43047, 73975, 81943
[KO:K01640]	4.1.3.4	hydroxymethylglutaryl-CoA lyase	CHLREDRAFT_195057		H632_c2327p0	contig-2327	a47812r76		jgi|ChlNC64A_1|10210|gw1.2.213.1	scaffold_2	CBPS_CBWC_CBWF_2314_1		jgi|Coc_C169_1|13706|e_gw1.4.580.1	scaffold_4	3055_1_CBOZ_CBPA					VOLCADRAFT_91759
[KO:K01641]	2.3.3.10	hydroxymethylglutaryl-CoA synthase	CHLREDRAFT_118594		H632_c1131p0	contig-1131	a28319r197		jgi|ChlNC64A_1|50079|fgenesh3_pg.C_scaffold_2000324	scaffold_2			jgi|Coc_C169_1|27384|estExt_Genewise1Plus.C_30063	scaffold_3	3188_1_CBOZ_CBPA					VOLCADRAFT_59473
[KO:K01969]	6.4.1.4	3-methylcrotonyl-CoA carboxylase beta subunit	CHLREDRAFT_24506		H632_c1954p0	contig-1954	a10163r307		jgi|ChlNC64A_1|140045|IGS.gm_28_00076	scaffold_28	CBPS_CBWC_CBWF_1314_2		jgi|Coc_C169_1|38395|fgenesh1_pm.20_#_87	scaffold_20						VOLCADRAFT_108896
[KO:K05607]	4.2.1.18	methylglutaconyl-CoA hydratase	CHLREDRAFT_186653		H632_c1275p0	contig-1275	a20662r136		jgi|ChlNC64A_1|28401|e_gw1.35.38.1	scaffold_35	CBPS_CBWC_CBWF_1991_1		jgi|Coc_C169_1|19962|e_gw1.20.164.1	scaffold_20	0_0_CBOZ3603.b1_CBOZ_CBPA					VOLCADRAFT_32282
[KO:K07513]	2.3.1.16	acetyl-CoA acyltransferase 1	CHLREDRAFT_138637		H632_c1964p1	contig-1964	a4945r347		jgi|ChlNC64A_1|16660|gw1.6.359.1	scaffold_6	CBPS_CBWC_CBWF_2185_2		jgi|Coc_C169_1|56826|Genemark1.5855_g	scaffold_12	149_1_CBOZ_CBPA		OSTLU_40909	MICPUN_105088	MICPUCDRAFT_44754	VOLCADRAFT_102696
[KO:K09699]	2.3.1.168	2-oxoisovalerate dehydrogenase E2 component (dihydrolipoyl transacylase)	CHLREDRAFT_101057		H632_c3954p0	contig-3954	a21665r110		jgi|ChlNC64A_1|7931|gw1.19.40.1		CBPS_CBWC_CBWF_3124_1		jgi|Coc_C169_1|55557|Genemark1.501_g	scaffold_1	3322_1_CBOZ_CBPA					VOLCADRAFT_61926
00290_Valine_leucine_and_isoleucine_biosynthesis
[KO:K00052]	1.1.1.85	3-isopropylmalate dehydrogenase	CHLREDRAFT_195906		H632_c1606p0	contig-1606	a24125r146		jgi|ChlNC64A_1|138856|IGS.gm_22_00097	scaffold_22	CBPS_CBWC_CBWF_1123_1		jgi|Coc_C169_1|25213|estExt_Genewise1.C_140350	scaffold_14	1060_0_CBOZ5666.b1_CBOZ_CBPA	Ot14g03440	OSTLU_29616	MICPUN_63361	MICPUCDRAFT_34079	VOLCADRAFT_106647
[KO:K00053]	1.1.1.86	ketol-acid reductoisomerase	CHLREDRAFT_140839		H632_c106p2	contig-106	a8861r375		jgi|ChlNC64A_1|58001|estExt_fgenesh3_pg.C_110205	scaffold_11	CBPS_CBWC_CBWF_325_1		jgi|Coc_C169_1|15892|e_gw1.8.74.1	scaffold_8	2800_1_CBOZ_CBPA	Ot03g02490	OSTLU_30575	MICPUN_57653	MICPUCDRAFT_49717	VOLCADRAFT_74529
[KO:K00826]	2.6.1.42	branched-chain amino acid aminotransferase	CHLREDRAFT_187392, 206169, 30522		H632_c1787p0, c2893p0	contig-1787, 1447	a48799r35, a3762r98		jgi|ChlNC64A_1|137805|IGS.gm_2_00272, |135272|IGS.gm_13_00200	scaffold_2, 13	CBPS_CBWC_CBWF_0_0_CBWC8043.b1, _3712_0_CBWC943.g1		jgi|Coc_C169_1|4913|gw1.1.425.1, |3754|gw1.1.327.1, |30871|estExt_Genewise1Plus.C_160313	scaffold_1, 16	1045_1_CBOZ_CBPA, 892_0_, 1811_0_CBOZ7269.g1_CBOZ_CBPA	Ot04g04970, Ot08g02190, Ot14g01920	OSTLU_31397, 33086, 43558	MICPUN_106230, 87938	MICPUCDRAFT_47963, 49600, 65271	VOLCADRAFT_102054, 43047, 73975, 81943
[KO:K01649]	2.3.3.13	2-isopropylmalate synthase	CHLREDRAFT_196609		H632_c2616p0	contig-2616	a20873r199		jgi|ChlNC64A_1|49722|fgenesh3_pg.C_scaffold_1000420	scaffold_1			jgi|Coc_C169_1|36369|fgenesh1_pm.6_#_217	scaffold_6		Ot01g05170	OSTLU_29150	MICPUN_96632, 96641	MICPUCDRAFT_36068, 47814	VOLCADRAFT_78720
[KO:K01652]	2.2.1.6	acetolactate synthase I/II/III large subunit	CHLREDRAFT_138180		H632_c2387p1	contig-2387	a35608r83		jgi|ChlNC64A_1|55348|fgenesh3_pg.C_scaffold_34000012	scaffold_34	CBPS_CBWC_CBWF_168_1		jgi|Coc_C169_1|18006|e_gw1.13.31.1	scaffold_13		Ot14g00970, Ot16g02270	OSTLU_51596, 89681	MICPUN_63569, 88562	MICPUCDRAFT_36361, 59390	VOLCADRAFT_73117
[KO:K01653]	2.2.1.6	acetolactate synthase I/III small subunit	CHLREDRAFT_5137		H632_c209p2	contig-209	a77928r22		jgi|ChlNC64A_1|33902|estExt_Genewise1Plus.C_20477	scaffold_2	CBPS_CBWC_CBWF_1091_1		jgi|Coc_C169_1|36345|fgenesh1_pm.6_#_193	scaffold_6		Ot11g00530	OSTLU_44053	MICPUN_109233	MICPUCDRAFT_50997	VOLCADRAFT_73781
[KO:K01687]	4.2.1.9	dihydroxy-acid dehydratase	CHLREDRAFT_129639		H632_c151p1	contig-151	a7726r237		jgi|ChlNC64A_1|58991|estExt_fgenesh3_pg.C_240042	scaffold_24			jgi|Coc_C169_1|1630|gw1.2.133.1	scaffold_2		Ot03g03790	OSTLU_34354	MICPUN_90156	MICPUCDRAFT_12265	VOLCADRAFT_77661
[KO:K01703]	4.2.1.33; 4.2.1.35	3-isopropylmalate/(R)-2-methylmalate dehydratase large subunit	CHLREDRAFT_132888		H632_c971p0	contig-971	a19809r76		jgi|ChlNC64A_1|56048|estExt_fgenesh3_pm.C_40040	scaffold_4	CBPS_CBWC_CBWF_1184_1		jgi|Coc_C169_1|13431|e_gw1.4.301.1	scaffold_4	1434_1_CBOZ_CBPA					VOLCADRAFT_75999
[KO:K01704]	4.2.1.33; 4.2.1.35	3-isopropylmalate/(R)-2-methylmalate dehydratase small subunit	CHLREDRAFT_126865			contig-508	a6476r231		jgi|ChlNC64A_1|12516|gw1.12.307.1	scaffold_12			jgi|Coc_C169_1|34971|fgenesh1_pm.1_#_312	scaffold_1	59_2_CBOZ_CBPA
[KO:K01754]	4.3.1.19	threonine dehydratase	CHLREDRAFT_196595		H632_c268p0	contig-268	a57580r51		jgi|ChlNC64A_1|25383|e_gw1.15.25.1	scaffold_15	CBPS_CBWC_CBWF_2795_1		jgi|Coc_C169_1|1294|gw1.9.58.1	scaffold_9	4712_0_CBOZ4576.g1_CBOZ_CBPA	Ot05g02850, Ot12g01590	OSTLU_39224	MICPUN_54333, 81963	MICPUCDRAFT_14650, 63278	VOLCADRAFT_88765
00300_Lysine_biosynthesis
[KO:K00133]	1.2.1.11	aspartate-semialdehyde dehydrogenase	CHLREDRAFT_148810		H632_c1362p1	contig-1362	a45422r84		jgi|ChlNC64A_1|134577|IGS.gm_11_00423	scaffold_11	CBPS_CBWC_CBWF_1291_1		jgi|Coc_C169_1|4416|gw1.8.182.1	scaffold_8	4061_1_CBOZ_CBPA	Ot01g02440	OSTLU_28856	MICPUN_51542	MICPUCDRAFT_31546	VOLCADRAFT_121504
[KO:K00215]	1.17.1.8	4-hydroxy-tetrahydrodipicolinate reductase	CHLREDRAFT_205760		H632_c985p0	contig-985	a45839r72		jgi|ChlNC64A_1|10511|gw1.15.122.1	scaffold_15			jgi|Coc_C169_1|6840|gw1.1.605.1	scaffold_1		Ot16g00560	OSTLU_40454	MICPUN_82373	MICPUCDRAFT_48022	VOLCADRAFT_109527
[KO:K00928]	2.7.2.4	aspartate kinase	CHLREDRAFT_161455		H632_c2711p0	contig-2711	a108922r36		jgi|ChlNC64A_1|134660|IGS.gm_12_00046	scaffold_12	CBPS_CBWC_CBWF_8_32		jgi|Coc_C169_1|12569|e_gw1.3.145.1	scaffold_3		Ot01g01590	OSTLU_44504	MICPUN_77518	MICPUCDRAFT_58461	VOLCADRAFT_87637
[KO:K01586]	4.1.1.20	diaminopimelate decarboxylase	CHLREDRAFT_146886		H632_c251p2	contig-251	a56314r63		jgi|ChlNC64A_1|49020|fgenesh3_pm.C_scaffold_18000003	scaffold_18	CBPS_CBWC_CBWF_683_2		jgi|Coc_C169_1|56619|Genemark1.5648_g	scaffold_12	1661_1_CBOZ_CBPA	Ot18g01130	OSTLU_28310	MICPUN_80416	MICPUCDRAFT_37004	VOLCADRAFT_84373
[KO:K01714]	4.3.3.7	4-hydroxy-tetrahydrodipicolinate synthase	CHLREDRAFT_126518		H632_c1557p1	contig-1557	a28083r98		jgi|ChlNC64A_1|48335|fgenesh3_kg.C_scaffold_26000012	scaffold_26	CBPS_CBWC_CBWF_318_1		jgi|Coc_C169_1|4980|gw1.3.290.1	scaffold_3	0_0_CBOZ4380.b1_CBOZ_CBPA	Ot05g01340	OSTLU_31602		MICPUCDRAFT_55708	VOLCADRAFT_56764
[KO:K01778]	5.1.1.7	diaminopimelate epimerase	CHLREDRAFT_150957		H632_c762p1	contig-762	a5941r456		jgi|ChlNC64A_1|36798|estExt_Genewise1Plus.C_210149	scaffold_21	CBPS_CBWC_CBWF_3418_1		jgi|Coc_C169_1|38149|fgenesh1_pm.18_#_102	scaffold_18	4338_1_CBOZ_CBPA	Ot02g06370	OSTLU_35896	MICPUN_59246	MICPUCDRAFT_44639	VOLCADRAFT_108222
[KO:K10206]	2.6.1.83	LL-diaminopimelate aminotransferase	CHLREDRAFT_129557		H632_c2334p0	contig-2334	a29149r65		jgi|ChlNC64A_1|135366|IGS.gm_13_00294	scaffold_13	CBPS_CBWC_CBWF_2353_0_CBWF3589.b3		jgi|Coc_C169_1|53643|estExt_fgenesh1_pm.C_90087	scaffold_9	4625_0_CBOZ3577.b1_CBOZ_CBPA	Ot03g00800	OSTLU_30412	MICPUN_54982	MICPUCDRAFT_55549	VOLCADRAFT_81843
[KO:K12524]	2.7.2.4; 1.1.1.3	bifunctional aspartokinase / homoserine dehydrogenase 1	CHLREDRAFT_196925		H632_c1182p0	contig-1182	a54308r58		jgi|ChlNC64A_1|144479|IGS.gm_7_00421	scaffold_383	CBPS_CBWC_CBWF_976_1		jgi|Coc_C169_1|19495|e_gw1.18.11.1	scaffold_18	4401_0_CBOZ10591.b1_CBOZ_CBPA	Ot09g03610	OSTLU_16870	MICPUN_88465	MICPUCDRAFT_32181	VOLCADRAFT_73076
00310_Lysine_degradation
[KO:K00128]	1.2.1.3	aldehyde dehydrogenase (NAD+)	CHLREDRAFT_135609		H632_c1464p0	contig-1464	a16775r225		jgi|ChlNC64A_1|7731|gw1.1.111.1	scaffold_1	CBPS_CBWC_CBWF_498_1		jgi|Coc_C169_1|2147|gw1.23.34.1	scaffold_23	1093_1_CBOZ_CBPA	Ot01g04160	OSTLU_13873	MICPUN_113300	MICPUCDRAFT_55745	VOLCADRAFT_73567
[KO:K00164]	1.2.4.2	2-oxoglutarate dehydrogenase E1 component	CHLREDRAFT_79471		H632_c354p0	contig-354	a9402r137		jgi|ChlNC64A_1|51381|fgenesh3_pg.C_scaffold_6000195	scaffold_6	CBPS_CBWC_CBWF_338_1		jgi|Coc_C169_1|36395|fgenesh1_pm.7_#_11	scaffold_7	1884_0_CBOZ3969.b1_CBOZ_CBPA	Ot03g02230, Ot16g00490	OSTLU_49109	MICPUN_104793, 82522	MICPUCDRAFT_19691, 35900	VOLCADRAFT_74810
[KO:K00626]	2.3.1.9	acetyl-CoA C-acetyltransferase	CHLREDRAFT_118204		H632_c3387p0	contig-3387	a991r574		jgi|ChlNC64A_1|56332|estExt_fgenesh3_pm.C_240017	scaffold_24	CBPS_CBWC_CBWF_2185_1		jgi|Coc_C169_1|4417|gw1.11.146.1	scaffold_11	149_1_CBOZ_CBPA					VOLCADRAFT_75176, 84837
[KO:K00658]	2.3.1.61	2-oxoglutarate dehydrogenase E2 component (dihydrolipoamide succinyltransferase)	CHLREDRAFT_145987		H632_c1100p1	contig-1100	a16480r229		jgi|ChlNC64A_1|19906|e_gw1.3.139.1	scaffold_3	CBPS_CBWC_CBWF_3124_1		jgi|Coc_C169_1|46126|estExt_fgenesh1_pg.C_20204	scaffold_2	3322_1_CBOZ_CBPA	Ot06g04370	OSTLU_119464	MICPUN_104943	MICPUCDRAFT_65465	VOLCADRAFT_81632
[KO:K11423]	2.1.1.43	histone-lysine N-methyltransferase SETD2	CHLREDRAFT_191388		H632_c1292p0	contig-1292	a61374r44		jgi|ChlNC64A_1|133563|IGS.gm_1_00699	scaffold_1	CBPS_CBWC_CBWF_1442_0_CBWC5984.b1		jgi|Coc_C169_1|41356|fgenesh1_pg.6_#_159	scaffold_6	2692_1_CBOZ_CBPA		OSTLU_18587	MICPUN_58938		VOLCADRAFT_65215
00330_Arginine_and_proline_metabolism
[KO:K00128]	1.2.1.3	aldehyde dehydrogenase (NAD+)	CHLREDRAFT_135609		H632_c1464p0	contig-1464	a16775r225		jgi|ChlNC64A_1|7731|gw1.1.111.1	scaffold_1	CBPS_CBWC_CBWF_498_1		jgi|Coc_C169_1|2147|gw1.23.34.1	scaffold_23	1093_1_CBOZ_CBPA	Ot01g04160	OSTLU_13873	MICPUN_113300	MICPUCDRAFT_55745	VOLCADRAFT_73567
[KO:K00145]	1.2.1.38	N-acetyl-gamma-glutamyl-phosphate reductase	CHLREDRAFT_191987		H632_c91p1	contig-91	a4692r133		jgi|ChlNC64A_1|55485|fgenesh3_pg.C_scaffold_37000035	scaffold_37	CBPS_CBWC_CBWF_842_2		jgi|Coc_C169_1|37359|fgenesh1_pm.12_#_102	scaffold_12	2024_1_CBOZ_CBPA	Ot14g02070	OSTLU_43628	MICPUN_63564	MICPUCDRAFT_45655	VOLCADRAFT_82287
[KO:K00261]	1.4.1.3	glutamate dehydrogenase (NAD(P)+)	CHLREDRAFT_82916		H632_c370p0	contig-370	a3972r613		jgi|ChlNC64A_1|48227|fgenesh3_kg.C_scaffold_11000011	scaffold_4	CBPS_CBWC_CBWF_358_1		jgi|Coc_C169_1|36676|fgenesh1_pm.8_#_76	scaffold_8	3695_1_CBOZ_CBPA					VOLCADRAFT_63307
[KO:K00274]	1.4.3.4	monoamine oxidase	CHLREDRAFT_187700																	VOLCADRAFT_60905
[KO:K00286]	1.5.1.2	pyrroline-5-carboxylate reductase	CHLREDRAFT_192364		H632_c1225p0	contig-1225	a20757r206		jgi|ChlNC64A_1|48555|fgenesh3_pm.C_scaffold_3000055	scaffold_3	CBPS_CBWC_CBWF_0_0_CBWF1614.b1		jgi|Coc_C169_1|39603|fgenesh1_pg.2_#_215	scaffold_2	3484_1_CBOZ_CBPA	Ot13g00090	OSTLU_13156	MICPUN_100385	MICPUCDRAFT_49529, 53732	VOLCADRAFT_80899
[KO:K00294]	1.2.1.88	1-pyrroline-5-carboxylate dehydrogenase	CHLREDRAFT_150809		H632_c1227p0	contig-1227	a3491r555		jgi|ChlNC64A_1|36795|estExt_Genewise1Plus.C_210146	scaffold_21	CBPS_CBWC_CBWF_1419_2		jgi|Coc_C169_1|38580|fgenesh1_pm.23_#_12	scaffold_23	3217_1_CBOZ_CBPA	Ot03g05840	OSTLU_30910			VOLCADRAFT_69010
[KO:K00318]	1.5.-.-	proline dehydrogenase	CHLREDRAFT_146649		H632_c53p2	contig-53	a7255r282		jgi|ChlNC64A_1|145399|IGS.gm_9_00206	scaffold_9	CBPS_CBWC_CBWF_335_1		jgi|Coc_C169_1|52201|estExt_fgenesh1_pm.C_10201	scaffold_1	3866_1_CBOZ_CBPA	Ot04g03090				VOLCADRAFT_64330
[KO:K00472]	1.14.11.2	prolyl 4-hydroxylase	CHLREDRAFT_111407, 114525, 122372, 138462, 138508, 143143		H632_c1040p0, c3860p0, c818p1, c227p2, c828p0, c871p1	contig-1040, 3860, 818, 828	a77109r51, a14524r265, a4054r497, a167r1984, a3095r726		jgi|ChlNC64A_1|143796|IGS.gm_6_00370, |55244|fgenesh3_pg.C_scaffold_32000036, |140836|IGS.gm_3_00575, |141227|IGS.gm_32_00065, |134938|IGS.gm_12_00324, |19330|e_gw1.2.232.1	scaffold_6, 32, 3, 12	CBPS_CBWC_CBWF_2301_1		jgi|Coc_C169_1|7650|gw1.6.320.1, |19131|e_gw1.17.119.1, |6252|gw1.17.119.1	scaffold_6, 4	1592_1_CBOZ_CBPA	Ot01g03290, Ot02g07180, Ot04g00140	OSTLU_37102, 37480	MICPUN_70761	MICPUCDRAFT_15413, 34636	VOLCADRAFT_120451, 62820, 64439, 80309, 82641
[KO:K00611]	2.1.3.3	ornithine carbamoyltransferase	CHLREDRAFT_188762		H632_c3735p0	contig-1887	a47596r48		jgi|ChlNC64A_1|48133|fgenesh3_kg.C_scaffold_4000001	scaffold_4	CBPS_CBWC_CBWF_2452_1		jgi|Coc_C169_1|33624|fgenesh1_kg.11_#_86_#_3450_1_CBOZ_CBPA	scaffold_11	3450_1_CBOZ_CBPA	Ot01g01460	OSTLU_28754	MICPUN_55476	MICPUCDRAFT_25133	VOLCADRAFT_80138
[KO:K00620]	2.3.1.35; 2.3.1.1	glutamate N-acetyltransferase / amino-acid N-acetyltransferase	CHLREDRAFT_121469		H632_c2404p0	contig-2404	a51664r66		jgi|ChlNC64A_1|135738|IGS.gm_14_00271	scaffold_14			jgi|Coc_C169_1|43453|fgenesh1_pg.13_#_96	scaffold_13		Ot08g02650	OSTLU_33128	MICPUN_102026	MICPUCDRAFT_58397	VOLCADRAFT_64030
[KO:K00797]	2.5.1.16	spermidine synthase	CHLREDRAFT_206050, 206069		H632_c251p1	contig-251	a20338r102		jgi|ChlNC64A_1|49023|fgenesh3_pm.C_scaffold_18000006, |26078|e_gw1.18.163.1	scaffold_18			jgi|Coc_C169_1|36900|fgenesh1_pm.9_#_157, |34920|fgenesh1_pm.1_#_261	scaffold_9,1	3032_2_, 268_1_CBOZ_CBPA	Ot06g00700, Ot11g01200	OSTLU_26437, 40897	MICPUN_106331, 80273	MICPUCDRAFT_45807, 49612	VOLCADRAFT_55771, 76291
[KO:K00811]	2.6.1.1	aspartate aminotransferase, chloroplastic	CHLREDRAFT_186959		H632_c1503p0	contig-1503	a190286r26		jgi|ChlNC64A_1|137913|IGS.gm_2_00380	scaffold_2	CBPS_CBWC_CBWF_802_1		jgi|Coc_C169_1|38638|fgenesh1_pm.24_#_7	scaffold_14	1112_1_CBOZ_CBPA			MICPUN_99771	MICPUCDRAFT_30404	VOLCADRAFT_81153
[KO:K00818]	2.6.1.11	acetylornithine aminotransferase	CHLREDRAFT_139007		H632_c2617p0	contig-2617	a39609r60		jgi|ChlNC64A_1|35901|estExt_Genewise1Plus.C_130046	scaffold_13	CBPS_CBWC_CBWF_3546_0_CBWC5889.g1		jgi|Coc_C169_1|11005|e_gw1.1.295.1	scaffold_1	1102_1_CBOZ_CBPA	Ot14g03520	OSTLU_19153	MICPUN_109320	MICPUCDRAFT_59169	VOLCADRAFT_127260
[KO:K00819]	2.6.1.13	ornithine--oxo-acid transaminase	CHLREDRAFT_195386		H632_c1082p0	contig-1082	a3835r1021		jgi|ChlNC64A_1|57535|estExt_fgenesh3_pg.C_70186	scaffold_7	CBPS_CBWC_CBWF_41_2		jgi|Coc_C169_1|38130|fgenesh1_pm.18_#_83	scaffold_18	1102_1_CBOZ_CBPA					VOLCADRAFT_102366
[KO:K00930]	2.7.2.8	acetylglutamate kinase	CHLREDRAFT_78991		H632_c3824p0	contig-3824	a142465r24		jgi|ChlNC64A_1|139373|IGS.gm_24_00153	scaffold_24	CBPS_CBWC_CBWF_2197_1		jgi|Coc_C169_1|35167|fgenesh1_pm.2_#_177	scaffold_2	3415_1_CBOZ_CBPA	Ot14g02870	OSTLU_52011	MICPUN_87915	MICPUCDRAFT_34118	VOLCADRAFT_83707
[KO:K01259]	3.4.11.5	proline iminopeptidase	CHLREDRAFT_118018			contig-2881										Ot16g03040	OSTLU_93830	MICPUN_59840	MICPUCDRAFT_46331	VOLCADRAFT_105760
[KO:K01438]	3.5.1.16	acetylornithine deacetylase	CHLREDRAFT_155546													Ot02g06210	OSTLU_29911	MICPUN_57843	MICPUCDRAFT_33575	VOLCADRAFT_81178
[KO:K01581]	4.1.1.17	ornithine decarboxylase	CHLREDRAFT_206067		H632_c251p2	contig-4005	a75157r45		jgi|ChlNC64A_1|133981|IGS.gm_10_00272	scaffold_10	CBPS_CBWC_CBWF_683_2		jgi|Coc_C169_1|2483|gw1.24.15.1	scaffold_24	3162_1_CBOZ_CBPA	Ot04g04130	OSTLU_31322			VOLCADRAFT_63034
[KO:K01611]	4.1.1.50	S-adenosylmethionine decarboxylase	CHLREDRAFT_183928		H632_c862p0	contig-862	a4201r137				CBPS_CBWC_CBWF_682_1		jgi|Coc_C169_1|38662|fgenesh1_pm.24_#_31	scaffold_24	3162_2_CBOZ_CBPA	Ot13g00890				VOLCADRAFT_84198
[KO:K01755]	4.3.2.1	argininosuccinate lyase	CHLREDRAFT_101662		H632_c1096p1	contig-1096	a38105r106		jgi|ChlNC64A_1|8405|gw1.23.50.1	scaffold_23	CBPS_CBWC_CBWF_455_1		jgi|Coc_C169_1|36889|fgenesh1_pm.9_#_146	scaffold_9		Ot12g03000	OSTLU_26950	MICPUN_79415	MICPUCDRAFT_12633	VOLCADRAFT_102036
[KO:K01915]	6.3.1.2	glutamine synthetase	CHLREDRAFT_129468, 133971, 136895		H632_c1293p0	contig-1293	a12412r254		jgi|ChlNC64A_1|143431|IGS.gm_6_00005, |48539|fgenesh3_pm.C_scaffold_3000039	scaffold_3	CBPS_CBWC_CBWF_556_1		jgi|Coc_C169_1|63040|Genemark1.3823_g, |4237|gw1.6.190.1	scaffold_7, 6	207_1_, 764_1_CBOZ_CBPA	Ot01g04890	OSTLU_39960	MICPUN_112708, 113822, 58286	MICPUCDRAFT_30309, 4228, 55724	VOLCADRAFT_103492, 77041
[KO:K01940]	6.3.4.5	argininosuccinate synthase	CHLREDRAFT_58140		H632_c2882p0	contig-2882	a4688r210		jgi|ChlNC64A_1|52216|fgenesh3_pg.C_scaffold_10000001	scaffold_10			jgi|Coc_C169_1|3144|gw1.24.23.1	scaffold_24	4955_0_CBOZ6794.b1_CBOZ_CBPA	Ot16g02920	OSTLU_19853	MICPUN_64373	MICPUCDRAFT_45942	VOLCADRAFT_104718
[KO:K10536]	3.5.3.12	agmatine deiminase	CHLREDRAFT_178381		H632_c815p2	contig-815	a54585r64		jgi|ChlNC64A_1|16878|gw1.1.662.1	scaffold_31	CBPS_CBWC_CBWF_446_2		jgi|Coc_C169_1|61769|Genemark1.2559_g	scaffold_4	538_1_CBOZ_CBPA					VOLCADRAFT_109899
[KO:K11182]	1.4.3.22	diamine oxidase	CHLREDRAFT_206147				a50011r54		jgi|ChlNC64A_1|18415|e_gw1.1.63.1				jgi|Coc_C169_1|21996|estExt_Genewise1.C_20747	scaffold_2	5110_0_CBOZ8416.g1_CBOZ_CBPA
[KO:K12251]	3.5.1.53	N-carbamoylputrescine amidase	CHLREDRAFT_117164		H632_c905p1	contig-905	a75104r43		jgi|ChlNC64A_1|10853|gw1.1.325.1	scaffold_1	CBPS_CBWC_CBWF_3881_0_CBWF5011.b1		jgi|Coc_C169_1|48894|estExt_fgenesh1_pg.C_190027	scaffold_19	3916_1_CBOZ_CBPA					VOLCADRAFT_120915
[KO:K12657]	2.7.2.11; 1.2.1.41	delta-1-pyrroline-5-carboxylate synthetase	CHLREDRAFT_130812			contig-2005	a16679r277		jgi|ChlNC64A_1|56063|estExt_fgenesh3_pm.C_50013	scaffold_5	CBPS_CBWC_CBWF_3652_0_CBWC7426.b1		jgi|Coc_C169_1|37765|fgenesh1_pm.15_#_41	scaffold_15		Ot10g02600		MICPUN_59938	MICPUCDRAFT_30966	VOLCADRAFT_65082
[KO:K14454]	2.6.1.1	aspartate aminotransferase, cytoplasmic	CHLREDRAFT_174097		H632_c1503p0	contig-1503	a6744r266		jgi|ChlNC64A_1|59142|estExt_fgenesh3_pg.C_270006	scaffold_2	CBPS_CBWC_CBWF_2147_1		jgi|Coc_C169_1|38233|fgenesh1_pm.19_#_55	scaffold_19	1112_1_CBOZ_CBPA					VOLCADRAFT_82929
[KO:K14455]	2.6.1.1	aspartate aminotransferase, mitochondrial	CHLREDRAFT_126943		H632_c1503p0	contig-1503	a6744r266		jgi|ChlNC64A_1|54903|fgenesh3_pg.C_scaffold_27000007	scaffold_2	CBPS_CBWC_CBWF_2147_1		jgi|Coc_C169_1|2107|gw1.14.65.1	scaffold_14	1112_1_CBOZ_CBPA	Ot05g01290	OSTLU_31597
[KO:K14682]	2.3.1.1	amino-acid N-acetyltransferase	CHLREDRAFT_130199		H632_c1545p0	contig-4977	a235437r15		jgi|ChlNC64A_1|27242|e_gw1.24.43.1	scaffold_24	CBPS_CBWC_CBWF_2197_1		jgi|Coc_C169_1|1890|gw1.2.165.1	scaffold_2	2750_1_CBOZ_CBPA	Ot08g02970	OSTLU_1828	MICPUN_84511	MICPUCDRAFT_45566	VOLCADRAFT_57336
00340_Histidine_metabolism
[KO:K00013]	1.1.1.23	histidinol dehydrogenase	CHLREDRAFT_126232		H632_c2656p0	contig-2656	a23184r69		jgi|ChlNC64A_1|33998|estExt_Genewise1Plus.C_30052	scaffold_3	CBPS_CBWC_CBWF_1347_1		jgi|Coc_C169_1|35185|fgenesh1_pm.2_#_195	scaffold_2	4184_2_CBOZ_CBPA	Ot01g05580	OSTLU_13980	MICPUN_89073	MICPUCDRAFT_44866	VOLCADRAFT_81513
[KO:K00128]	1.2.1.3	aldehyde dehydrogenase (NAD+)	CHLREDRAFT_135609		H632_c1464p0	contig-1464	a16775r225		jgi|ChlNC64A_1|7731|gw1.1.111.1	scaffold_1	CBPS_CBWC_CBWF_498_1		jgi|Coc_C169_1|2147|gw1.23.34.1	scaffold_23	1093_1_CBOZ_CBPA	Ot01g04160	OSTLU_13873	MICPUN_113300	MICPUCDRAFT_55745	VOLCADRAFT_73567
[KO:K00274]	1.4.3.4	monoamine oxidase	CHLREDRAFT_187700																	VOLCADRAFT_60905
[KO:K00817]	2.6.1.9	histidinol-phosphate aminotransferase	CHLREDRAFT_103841		H632_c1923p0	contig-1923	a49441r101		jgi|ChlNC64A_1|9280|gw1.29.51.1	scaffold_29			jgi|Coc_C169_1|38712|fgenesh1_pm.25_#_37	scaffold_25	494_1_CBOZ_CBPA		OSTLU_119523	MICPUN_107360	MICPUCDRAFT_49460	VOLCADRAFT_109854
[KO:K01590]	4.1.1.22	histidine decarboxylase	CHLREDRAFT_40158		H632_c172p0	contig-172	a5523r408		jgi|ChlNC64A_1|8195|gw1.18.66.1	scaffold_18			jgi|Coc_C169_1|54036|estExt_fgenesh1_pm.C_120108	scaffold_12	3150_1_CBOZ_CBPA					VOLCADRAFT_82548
[KO:K01593]	4.1.1.28	aromatic-L-amino-acid decarboxylase	CHLREDRAFT_116869		H632_c2p5	contig-2	a3200r662		jgi|ChlNC64A_1|7815|gw1.33.21.1	scaffold_33	CBPS_CBWC_CBWF_0_0_CBWC3982.b1		jgi|Coc_C169_1|2760|gw1.10.132.1	scaffold_10	325_1_CBOZ_CBPA
[KO:K01693]	4.2.1.19	imidazoleglycerol-phosphate dehydratase	CHLREDRAFT_186880		H632_c2076p1	contig-2076	a16382r179		jgi|ChlNC64A_1|137630|IGS.gm_2_00097	scaffold_2			jgi|Coc_C169_1|38515|fgenesh1_pm.22_#_18	scaffold_22	761_1_CBOZ_CBPA	Ot10g02640	OSTLU_38080			VOLCADRAFT_82091
[KO:K01814]	5.3.1.16	phosphoribosylformimino-5-aminoimidazole carboxamide ribotide isomerase	CHLREDRAFT_82364		H632_c390p1	contig-390	a39429r112		jgi|ChlNC64A_1|137774|IGS.gm_2_00241	scaffold_2			jgi|Coc_C169_1|54436|estExt_fgenesh1_pm.C_160082	scaffold_16	645_1_CBOZ_CBPA	Ot07g00070	OSTLU_35464	MICPUN_56350	MICPUCDRAFT_13561	VOLCADRAFT_107427
[KO:K11182]	1.4.3.22	diamine oxidase	CHLREDRAFT_206147				a50011r54		jgi|ChlNC64A_1|18415|e_gw1.1.63.1				jgi|Coc_C169_1|21996|estExt_Genewise1.C_20747	scaffold_2	5110_0_CBOZ8416.g1_CBOZ_CBPA
[KO:K11755]	3.6.1.31; 3.5.4.19	phosphoribosyl-ATP pyrophosphohydrolase / phosphoribosyl-AMP cyclohydrolase	CHLREDRAFT_187988		H632_c30p0	contig-30	a40371r55		jgi|ChlNC64A_1|57229|estExt_fgenesh3_pg.C_50127	scaffold_5	CBPS_CBWC_CBWF_2899_1		jgi|Coc_C169_1|6372|gw1.9.274.1	scaffold_9			OSTLU_31034	MICPUN_84451	MICPUCDRAFT_16167	VOLCADRAFT_59102
00350_Tyrosine_metabolism
[KO:K00121]	1.1.1.284; 1.1.1.1	S-(hydroxymethyl)glutathione dehydrogenase / alcohol dehydrogenase	CHLREDRAFT_129874		H632_c26p4	contig-26	a21910r144		jgi|ChlNC64A_1|48081|fgenesh3_kg.C_scaffold_1000017	scaffold_1	CBPS_CBWC_CBWF_992_1		jgi|Coc_C169_1|36309|fgenesh1_pm.6_#_157	scaffold_6	2971_1_CBOZ_CBPA	Ot15g01360	OSTLU_27414			VOLCADRAFT_82410
[KO:K00274]	1.4.3.4	monoamine oxidase	CHLREDRAFT_187700																	VOLCADRAFT_60905
[KO:K00276]	1.4.3.21	primary-amine oxidase	CHLREDRAFT_176519, 178662				a50011r54		jgi|ChlNC64A_1|49652|fgenesh3_pg.C_scaffold_1000350	scaffold_12	CBPS_CBWC_CBWF_834_1, _834_0_CBPS632.b1		jgi|Coc_C169_1|33265|fgenesh1_kg.8_#_67_#_561_1_CBOZ_CBPA, |1298|gw1.8.55.1	scaffold_5, 8	561_1_CBOZ_CBPA			MICPUN_56524		VOLCADRAFT_84774
[KO:K00451]	1.13.11.5	homogentisate 1,2-dioxygenase	CHLREDRAFT_76437		H632_c2023p0	contig-2023	a4599r504		jgi|ChlNC64A_1|142029|IGS.gm_4_00170	scaffold_4	CBPS_CBWC_CBWF_3078_1		jgi|Coc_C169_1|3304|gw1.4.293.1	scaffold_4	4319_1_CBOZ_CBPA				MICPUCDRAFT_3147
[KO:K00457]	1.13.11.27	4-hydroxyphenylpyruvate dioxygenase	CHLREDRAFT_137761, 149028		H632_c1538p1	contig-1538	a5181r407		jgi|ChlNC64A_1|8352|gw1.3.141.1	scaffold_3			jgi|Coc_C169_1|35439|fgenesh1_pm.3_#_114, |12997|e_gw1.3.595.1	scaffold_3	2880_0_CBOZ5386.b1_CBOZ_CBPA	Ot03g03700	OSTLU_45212	MICPUN_79223	MICPUCDRAFT_12391	VOLCADRAFT_62773
[KO:K00811]	2.6.1.1	aspartate aminotransferase, chloroplastic	CHLREDRAFT_186959		H632_c1503p0	contig-1503	a190286r26		jgi|ChlNC64A_1|137913|IGS.gm_2_00380	scaffold_2	CBPS_CBWC_CBWF_802_1		jgi|Coc_C169_1|38638|fgenesh1_pm.24_#_7	scaffold_14	1112_1_CBOZ_CBPA			MICPUN_99771	MICPUCDRAFT_30404	VOLCADRAFT_81153
[KO:K00817]	2.6.1.9	histidinol-phosphate aminotransferase	CHLREDRAFT_103841		H632_c1923p0	contig-1923	a49441r101		jgi|ChlNC64A_1|9280|gw1.29.51.1	scaffold_29			jgi|Coc_C169_1|38712|fgenesh1_pm.25_#_37	scaffold_25	494_1_CBOZ_CBPA		OSTLU_119523	MICPUN_107360	MICPUCDRAFT_49460	VOLCADRAFT_109854
[KO:K01555]	3.7.1.2	fumarylacetoacetase	CHLREDRAFT_122609		H632_c1850p0	contig-1850	a43590r136		jgi|ChlNC64A_1|21019|e_gw1.5.155.1	scaffold_5	CBPS_CBWC_CBWF_3549_0_CBWC5911.b1		jgi|Coc_C169_1|10370|gw1.14.332.1	scaffold_14					MICPUCDRAFT_30014	VOLCADRAFT_63270
[KO:K01593]	4.1.1.28	aromatic-L-amino-acid decarboxylase	CHLREDRAFT_116869		H632_c2p5	contig-2	a3200r662		jgi|ChlNC64A_1|7815|gw1.33.21.1	scaffold_33	CBPS_CBWC_CBWF_0_0_CBWC3982.b1		jgi|Coc_C169_1|2760|gw1.10.132.1	scaffold_10	325_1_CBOZ_CBPA
[KO:K14454]	2.6.1.1	aspartate aminotransferase, cytoplasmic	CHLREDRAFT_174097		H632_c1503p0	contig-1503	a6744r266		jgi|ChlNC64A_1|59142|estExt_fgenesh3_pg.C_270006	scaffold_2	CBPS_CBWC_CBWF_2147_1		jgi|Coc_C169_1|38233|fgenesh1_pm.19_#_55	scaffold_19	1112_1_CBOZ_CBPA					VOLCADRAFT_82929
[KO:K14455]	2.6.1.1	aspartate aminotransferase, mitochondrial	CHLREDRAFT_126943		H632_c1503p0	contig-1503	a6744r266		jgi|ChlNC64A_1|54903|fgenesh3_pg.C_scaffold_27000007	scaffold_2	CBPS_CBWC_CBWF_2147_1		jgi|Coc_C169_1|2107|gw1.14.65.1	scaffold_14	1112_1_CBOZ_CBPA	Ot05g01290	OSTLU_31597
[KO:K15849]	2.6.1.1; 2.6.1.78; 2.6.1.79	bifunctional aspartate aminotransferase and glutamate/aspartate-prephenate aminotransferase	CHLREDRAFT_118364		H632_c2822p1	contig-2822	a10944r174		jgi|ChlNC64A_1|137954|IGS.gm_2_00421	scaffold_2	CBPS_CBWC_CBWF_8_0_CBWF1262.g1		jgi|Coc_C169_1|63163|Genemark1.3946_g	scaffold_7	91_2_CBOZ_CBPA	Ot16g00690	OSTLU_89248	MICPUN_59090	MICPUCDRAFT_71025	VOLCADRAFT_103084
00360_Phenylalanine_metabolism
[KO:K00074]	1.1.1.157	3-hydroxybutyryl-CoA dehydrogenase	CHLREDRAFT_79407		H632_c1209p0	contig-1209	a11891r157		jgi|ChlNC64A_1|11293|gw1.10.155.1	scaffold_10	CBPS_CBWC_CBWF_2330_1		jgi|Coc_C169_1|37630|fgenesh1_pm.14_#_64	scaffold_14
[KO:K00274]	1.4.3.4	monoamine oxidase	CHLREDRAFT_187700																	VOLCADRAFT_60905
[KO:K00276]	1.4.3.21	primary-amine oxidase	CHLREDRAFT_176519, 178662				a50011r54		jgi|ChlNC64A_1|49652|fgenesh3_pg.C_scaffold_1000350	scaffold_12	CBPS_CBWC_CBWF_834_1, _834_0_CBPS632.b1		jgi|Coc_C169_1|33265|fgenesh1_kg.8_#_67_#_561_1_CBOZ_CBPA, |1298|gw1.8.55.1	scaffold_5, 8	561_1_CBOZ_CBPA			MICPUN_56524		VOLCADRAFT_84774
[KO:K00457]	1.13.11.27	4-hydroxyphenylpyruvate dioxygenase	CHLREDRAFT_137761, 149028		H632_c1538p1	contig-1538	a5181r407		jgi|ChlNC64A_1|8352|gw1.3.141.1	scaffold_3			jgi|Coc_C169_1|35439|fgenesh1_pm.3_#_114, |12997|e_gw1.3.595.1	scaffold_3	2880_0_CBOZ5386.b1_CBOZ_CBPA	Ot03g03700	OSTLU_45212	MICPUN_79223	MICPUCDRAFT_12391	VOLCADRAFT_62773
[KO:K00811]	2.6.1.1	aspartate aminotransferase, chloroplastic	CHLREDRAFT_186959		H632_c1503p0	contig-1503	a190286r26		jgi|ChlNC64A_1|137913|IGS.gm_2_00380	scaffold_2	CBPS_CBWC_CBWF_802_1		jgi|Coc_C169_1|38638|fgenesh1_pm.24_#_7	scaffold_14	1112_1_CBOZ_CBPA			MICPUN_99771	MICPUCDRAFT_30404	VOLCADRAFT_81153
[KO:K00817]	2.6.1.9	histidinol-phosphate aminotransferase	CHLREDRAFT_103841		H632_c1923p0	contig-1923	a49441r101		jgi|ChlNC64A_1|9280|gw1.29.51.1	scaffold_29			jgi|Coc_C169_1|38712|fgenesh1_pm.25_#_37	scaffold_25	494_1_CBOZ_CBPA		OSTLU_119523	MICPUN_107360	MICPUCDRAFT_49460	VOLCADRAFT_109854
[KO:K01593]	4.1.1.28	aromatic-L-amino-acid decarboxylase	CHLREDRAFT_116869		H632_c2p5	contig-2	a3200r662		jgi|ChlNC64A_1|7815|gw1.33.21.1	scaffold_33	CBPS_CBWC_CBWF_0_0_CBWC3982.b1		jgi|Coc_C169_1|2760|gw1.10.132.1	scaffold_10	325_1_CBOZ_CBPA
[KO:K14454]	2.6.1.1	aspartate aminotransferase, cytoplasmic	CHLREDRAFT_174097		H632_c1503p0	contig-1503	a6744r266		jgi|ChlNC64A_1|59142|estExt_fgenesh3_pg.C_270006	scaffold_2	CBPS_CBWC_CBWF_2147_1		jgi|Coc_C169_1|38233|fgenesh1_pm.19_#_55	scaffold_19	1112_1_CBOZ_CBPA					VOLCADRAFT_82929
[KO:K14455]	2.6.1.1	aspartate aminotransferase, mitochondrial	CHLREDRAFT_126943		H632_c1503p0	contig-1503	a6744r266		jgi|ChlNC64A_1|54903|fgenesh3_pg.C_scaffold_27000007	scaffold_2	CBPS_CBWC_CBWF_2147_1		jgi|Coc_C169_1|2107|gw1.14.65.1	scaffold_14	1112_1_CBOZ_CBPA	Ot05g01290	OSTLU_31597
[KO:K15849]	2.6.1.1; 2.6.1.78; 2.6.1.79	bifunctional aspartate aminotransferase and glutamate/aspartate-prephenate aminotransferase	CHLREDRAFT_118364		H632_c2822p1	contig-2822	a10944r174		jgi|ChlNC64A_1|137954|IGS.gm_2_00421	scaffold_2	CBPS_CBWC_CBWF_8_0_CBWF1262.g1		jgi|Coc_C169_1|63163|Genemark1.3946_g	scaffold_7	91_2_CBOZ_CBPA	Ot16g00690	OSTLU_89248	MICPUN_59090	MICPUCDRAFT_71025	VOLCADRAFT_103084
00380_Tryptophan_metabolism
[KO:K00128]	1.2.1.3	aldehyde dehydrogenase (NAD+)	CHLREDRAFT_135609		H632_c1464p0	contig-1464	a16775r225		jgi|ChlNC64A_1|7731|gw1.1.111.1	scaffold_1	CBPS_CBWC_CBWF_498_1		jgi|Coc_C169_1|2147|gw1.23.34.1	scaffold_23	1093_1_CBOZ_CBPA	Ot01g04160	OSTLU_13873	MICPUN_113300	MICPUCDRAFT_55745	VOLCADRAFT_73567
[KO:K00164]	1.2.4.2	2-oxoglutarate dehydrogenase E1 component	CHLREDRAFT_79471		H632_c354p0	contig-354	a9402r137		jgi|ChlNC64A_1|51381|fgenesh3_pg.C_scaffold_6000195	scaffold_6	CBPS_CBWC_CBWF_338_1		jgi|Coc_C169_1|36395|fgenesh1_pm.7_#_11	scaffold_7	1884_0_CBOZ3969.b1_CBOZ_CBPA	Ot03g02230, Ot16g00490	OSTLU_49109	MICPUN_104793, 82522	MICPUCDRAFT_19691, 35900	VOLCADRAFT_74810
[KO:K00274]	1.4.3.4	monoamine oxidase	CHLREDRAFT_187700																	VOLCADRAFT_60905
[KO:K00463]	1.13.11.52	indoleamine 2,3-dioxygenase	CHLREDRAFT_170294						jgi|ChlNC64A_1|18277|e_gw1.1.327.1	scaffold_1
[KO:K00626]	2.3.1.9	acetyl-CoA C-acetyltransferase	CHLREDRAFT_118204		H632_c3387p0	contig-3387	a991r574		jgi|ChlNC64A_1|56332|estExt_fgenesh3_pm.C_240017	scaffold_24	CBPS_CBWC_CBWF_2185_1		jgi|Coc_C169_1|4417|gw1.11.146.1	scaffold_11	149_1_CBOZ_CBPA					VOLCADRAFT_75176, 84837
[KO:K01593]	4.1.1.28	aromatic-L-amino-acid decarboxylase	CHLREDRAFT_116869		H632_c2p5	contig-2	a3200r662		jgi|ChlNC64A_1|7815|gw1.33.21.1	scaffold_33	CBPS_CBWC_CBWF_0_0_CBWC3982.b1		jgi|Coc_C169_1|2760|gw1.10.132.1	scaffold_10	325_1_CBOZ_CBPA
[KO:K03781]	1.11.1.6	catalase	CHLREDRAFT_150104		H632_c12p2	contig-12	a2121r692		jgi|ChlNC64A_1|57817|estExt_fgenesh3_pg.C_100041	scaffold_10	CBPS_CBWC_CBWF_978_1		jgi|Coc_C169_1|37793|fgenesh1_pm.15_#_69	scaffold_16	391_1_CBOZ_CBPA					VOLCADRAFT_74635
[KO:K11182]	1.4.3.22	diamine oxidase	CHLREDRAFT_206147				a50011r54		jgi|ChlNC64A_1|18415|e_gw1.1.63.1				jgi|Coc_C169_1|21996|estExt_Genewise1.C_20747	scaffold_2	5110_0_CBOZ8416.g1_CBOZ_CBPA
00400_Phenylalanine_tyrosine_and_tryptophan_biosynthesis
[KO:K00766]	2.4.2.18	anthranilate phosphoribosyltransferase	CHLREDRAFT_126030		H632_c482p1	contig-482	a31494r92		jgi|ChlNC64A_1|9092|gw1.24.96.1	scaffold_24			jgi|Coc_C169_1|4926|gw1.2.408.1	scaffold_2	5011_0_CBOZ7436.b1_CBOZ_CBPA	Ot06g01890	OSTLU_32105	MICPUN_107872	MICPUCDRAFT_40109
[KO:K00800]	2.5.1.19	3-phosphoshikimate 1-carboxyvinyltransferase	CHLREDRAFT_133088		H632_c1125p0	contig-1125	a100796r34		jgi|ChlNC64A_1|23771|e_gw1.11.147.1	scaffold_11	CBPS_CBWC_CBWF_2136_1		jgi|Coc_C169_1|37459|fgenesh1_pm.13_#_27	scaffold_8	4815_0_CBOZ5521.b1_CBOZ_CBPA	Ot14g02430	OSTLU_43874	MICPUN_54614	MICPUCDRAFT_45646	VOLCADRAFT_79287
[KO:K00811]	2.6.1.1	aspartate aminotransferase, chloroplastic	CHLREDRAFT_186959		H632_c1503p0	contig-1503	a190286r26		jgi|ChlNC64A_1|137913|IGS.gm_2_00380	scaffold_2	CBPS_CBWC_CBWF_802_1		jgi|Coc_C169_1|38638|fgenesh1_pm.24_#_7	scaffold_14	1112_1_CBOZ_CBPA			MICPUN_99771	MICPUCDRAFT_30404	VOLCADRAFT_81153
[KO:K00817]	2.6.1.9	histidinol-phosphate aminotransferase	CHLREDRAFT_103841		H632_c1923p0	contig-1923	a49441r101		jgi|ChlNC64A_1|9280|gw1.29.51.1	scaffold_29			jgi|Coc_C169_1|38712|fgenesh1_pm.25_#_37	scaffold_25	494_1_CBOZ_CBPA		OSTLU_119523	MICPUN_107360	MICPUCDRAFT_49460	VOLCADRAFT_109854
[KO:K00891]	2.7.1.71	shikimate kinase	CHLREDRAFT_196593		H632_c2658p0	contig-2658	a29537r89		jgi|ChlNC64A_1|142776|IGS.gm_5_00105	scaffold_5	CBPS_CBWC_CBWF_2131_1		jgi|Coc_C169_1|57548|Genemark1.6577_g	scaffold_13		Ot14g03180	OSTLU_10503	MICPUN_103803	MICPUCDRAFT_7901	VOLCADRAFT_86714
[KO:K01609]	4.1.1.48	indole-3-glycerol phosphate synthase	CHLREDRAFT_9190						jgi|ChlNC64A_1|135426|IGS.gm_13_00354	scaffold_13			jgi|Coc_C169_1|63796|Genemark1.4579_g	scaffold_9		Ot02g05010	OSTLU_32358	MICPUN_55656	MICPUCDRAFT_35481	VOLCADRAFT_57848
[KO:K01626]	2.5.1.54	3-deoxy-7-phosphoheptulonate synthase	CHLREDRAFT_192517		H632_c2560p0	contig-2560	a32033r75		jgi|ChlNC64A_1|135630|IGS.gm_14_00163	scaffold_14	CBPS_CBWC_CBWF_373_1		jgi|Coc_C169_1|37460|fgenesh1_pm.13_#_28	scaffold_6	734_2_CBOZ_CBPA	Ot06g03510	OSTLU_40785	MICPUN_107678	MICPUCDRAFT_49704	VOLCADRAFT_109577
[KO:K01657]	4.1.3.27	anthranilate synthase component I	CHLREDRAFT_115047		H632_c297p2	contig-297	a39288r144		jgi|ChlNC64A_1|136364|IGS.gm_16_00087	scaffold_16	CBPS_CBWC_CBWF_1978_1		jgi|Coc_C169_1|37930|fgenesh1_pm.16_#_95	scaffold_16		Ot07g00990	OSTLU_87709	MICPUN_79310	MICPUCDRAFT_16051	VOLCADRAFT_103239
[KO:K01658]	4.1.3.27	anthranilate synthase component II	CHLREDRAFT_79042		H632_c2425p0	contig-2425	a26942r105		jgi|ChlNC64A_1|144695|IGS.gm_8_00023	scaffold_8	CBPS_CBWC_CBWF_3620_0_CBWC6996.b1		jgi|Coc_C169_1|16518|e_gw1.10.409.1	scaffold_10	4059_1_CBOZ_CBPA	Ot10g02500	OSTLU_38312	MICPUN_84762	MICPUCDRAFT_23759	VOLCADRAFT_81469
[KO:K01695]	4.2.1.20	tryptophan synthase alpha chain	CHLREDRAFT_81238		H632_c4264p0	contig-4264	a21884r90		jgi|ChlNC64A_1|48138|fgenesh3_kg.C_scaffold_4000006	scaffold_4	CBPS_CBWC_CBWF_2164_1		jgi|Coc_C169_1|61629|Genemark1.2419_g	scaffold_4		Ot04g00330	OSTLU_49484	MICPUN_79000	MICPUCDRAFT_35499	VOLCADRAFT_105923
[KO:K01696]	4.2.1.20	tryptophan synthase beta chain	CHLREDRAFT_9823		H632_c2216p0	contig-2216	a10261r163		jgi|ChlNC64A_1|49143|fgenesh3_pm.C_scaffold_25000004	scaffold_25	CBPS_CBWC_CBWF_1293_0_CBWF1768.g1		jgi|Coc_C169_1|38053|fgenesh1_pm.18_#_6	scaffold_18	3699_1_CBOZ_CBPA	Ot07g02680	OSTLU_32688	MICPUN_93438	MICPUCDRAFT_33061	VOLCADRAFT_109912
[KO:K01735]	4.2.3.4	3-dehydroquinate synthase	CHLREDRAFT_196549		H632_c3027p0	contig-3027	a26716r132		jgi|ChlNC64A_1|49232|fgenesh3_pm.C_scaffold_29000013	scaffold_29			jgi|Coc_C169_1|4990|gw1.4.452.1	scaffold_4	1181_1_CBOZ_CBPA	Ot05g01830	OSTLU_38791	MICPUN_55324	MICPUCDRAFT_31652	VOLCADRAFT_58704
[KO:K01736]	4.2.3.5	chorismate synthase	CHLREDRAFT_191993		H632_c2485p0	contig-2485	a32909r73		jgi|ChlNC64A_1|37427|estExt_Genewise1Plus.C_290140	scaffold_29	CBPS_CBWC_CBWF_171_1		jgi|Coc_C169_1|14994|e_gw1.6.173.1	scaffold_13	1018_1_CBOZ_CBPA	Ot02g06020	OSTLU_29930	MICPUN_58411	MICPUCDRAFT_46854	VOLCADRAFT_82898
[KO:K01817]	5.3.1.24	phosphoribosylanthranilate isomerase	CHLREDRAFT_184947			contig-18	a14574r108		jgi|ChlNC64A_1|23487|e_gw1.11.180.1	scaffold_11			jgi|Coc_C169_1|12245|e_gw1.2.580.1	scaffold_2		Ot11g03290	OSTLU_6627	MICPUN_103599	MICPUCDRAFT_63121	VOLCADRAFT_57561
[KO:K01850]	5.4.99.5	chorismate mutase	CHLREDRAFT_196317		H632_c4227p0	contig-4903	a45003r82		jgi|ChlNC64A_1|56344|estExt_fgenesh3_pm.C_250009	scaffold_25	CBPS_CBWC_CBWF_1912_1		jgi|Coc_C169_1|47404|estExt_fgenesh1_pg.C_70266	scaffold_7	4353_1_CBOZ_CBPA		OSTLU_16515	MICPUN_102033	MICPUCDRAFT_5447	VOLCADRAFT_43298
[KO:K05359]	4.2.1.91; 4.2.1.51	arogenate/prephenate dehydratase	CHLREDRAFT_196330		H632_c3849p0	contig-3849	a17979r119		jgi|ChlNC64A_1|58990|estExt_fgenesh3_pg.C_240041	scaffold_24	CBPS_CBWC_CBWF_2354_1		jgi|Coc_C169_1|4528|gw1.2.382.1	scaffold_2		Ot01g01250	OSTLU_13638	MICPUN_93192	MICPUCDRAFT_13723	VOLCADRAFT_102779
[KO:K13832]	4.2.1.10; 1.1.1.25	3-dehydroquinate dehydratase / shikimate dehydrogenase	CHLREDRAFT_196935		H632_c2769p0	contig-2769	a41280r61		jgi|ChlNC64A_1|7514|gw1.5.67.1	scaffold_5	CBPS_CBWC_CBWF_3822_0_CBWF3571.g1		jgi|Coc_C169_1|14974|e_gw1.6.84.1	scaffold_6		Ot12g02660	OSTLU_39392	MICPUN_89537	MICPUCDRAFT_1820	VOLCADRAFT_82062
[KO:K14454]	2.6.1.1	aspartate aminotransferase, cytoplasmic	CHLREDRAFT_174097		H632_c1503p0	contig-1503	a6744r266		jgi|ChlNC64A_1|59142|estExt_fgenesh3_pg.C_270006	scaffold_2	CBPS_CBWC_CBWF_2147_1		jgi|Coc_C169_1|38233|fgenesh1_pm.19_#_55	scaffold_19	1112_1_CBOZ_CBPA					VOLCADRAFT_82929
[KO:K14455]	2.6.1.1	aspartate aminotransferase, mitochondrial	CHLREDRAFT_126943		H632_c1503p0	contig-1503	a6744r266		jgi|ChlNC64A_1|54903|fgenesh3_pg.C_scaffold_27000007	scaffold_2	CBPS_CBWC_CBWF_2147_1		jgi|Coc_C169_1|2107|gw1.14.65.1	scaffold_14	1112_1_CBOZ_CBPA	Ot05g01290	OSTLU_31597
[KO:K15227]	1.3.1.78	arogenate dehydrogenase (NADP+), plant	CHLREDRAFT_191605		H632_c790p2	contig-790	a10707r216		jgi|ChlNC64A_1|16961|gw1.2.609.1	scaffold_2			jgi|Coc_C169_1|14950|e_gw1.6.499.1	scaffold_6	4935_0_CBOZ6665.b1_CBOZ_CBPA	Ot02g03650	OSTLU_119548	MICPUN_102217	MICPUCDRAFT_4596	VOLCADRAFT_78949
[KO:K15849]	2.6.1.1; 2.6.1.78; 2.6.1.79	bifunctional aspartate aminotransferase and glutamate/aspartate-prephenate aminotransferase	CHLREDRAFT_118364		H632_c2822p1	contig-2822	a10944r174		jgi|ChlNC64A_1|137954|IGS.gm_2_00421	scaffold_2	CBPS_CBWC_CBWF_8_0_CBWF1262.g1		jgi|Coc_C169_1|63163|Genemark1.3946_g	scaffold_7	91_2_CBOZ_CBPA	Ot16g00690	OSTLU_89248	MICPUN_59090	MICPUCDRAFT_71025	VOLCADRAFT_103084
00410_beta-Alanine_metabolism
[KO:K00128]	1.2.1.3	aldehyde dehydrogenase (NAD+)	CHLREDRAFT_135609		H632_c1464p0	contig-1464	a16775r225		jgi|ChlNC64A_1|7731|gw1.1.111.1	scaffold_1	CBPS_CBWC_CBWF_498_1		jgi|Coc_C169_1|2147|gw1.23.34.1	scaffold_23	1093_1_CBOZ_CBPA	Ot01g04160	OSTLU_13873	MICPUN_113300	MICPUCDRAFT_55745	VOLCADRAFT_73567
[KO:K00140]	1.2.1.18; 1.2.1.27	malonate-semialdehyde dehydrogenase (acetylating) / methylmalonate-semialdehyde dehydrogenase	CHLREDRAFT_130434		H632_c2218p0	contig-2218	a9793r275		jgi|ChlNC64A_1|51901|fgenesh3_pg.C_scaffold_8000188	scaffold_8	CBPS_CBWC_CBWF_0_0_CBWF5994.b1		jgi|Coc_C169_1|42781|fgenesh1_pg.10_#_284	scaffold_10	3538_2_CBOZ_CBPA					VOLCADRAFT_59269
[KO:K00207]	1.3.1.2	dihydropyrimidine dehydrogenase (NADP+)	CHLREDRAFT_134846		H632_c750p1	contig-750	a6554r192		jgi|ChlNC64A_1|48243|fgenesh3_kg.C_scaffold_12000014	scaffold_129	CBPS_CBWC_CBWF_405_1		jgi|Coc_C169_1|3972|gw1.14.146.1	scaffold_14				MICPUN_109450		VOLCADRAFT_80405
[KO:K00249]	1.3.8.7	acyl-CoA dehydrogenase	CHLREDRAFT_118751		H632_c2446p0	contig-4942	a110980r25		jgi|ChlNC64A_1|26769|e_gw1.22.13.1	scaffold_22			jgi|Coc_C169_1|664|gw1.5.40.1	scaffold_5
[KO:K00276]	1.4.3.21	primary-amine oxidase	CHLREDRAFT_176519, 178662				a50011r54		jgi|ChlNC64A_1|49652|fgenesh3_pg.C_scaffold_1000350	scaffold_12	CBPS_CBWC_CBWF_834_1, _834_0_CBPS632.b1		jgi|Coc_C169_1|33265|fgenesh1_kg.8_#_67_#_561_1_CBOZ_CBPA, |1298|gw1.8.55.1	scaffold_5, 8	561_1_CBOZ_CBPA			MICPUN_56524		VOLCADRAFT_84774
[KO:K00797]	2.5.1.16	spermidine synthase	CHLREDRAFT_206050, 206069		H632_c251p1	contig-251	a20338r102		jgi|ChlNC64A_1|49023|fgenesh3_pm.C_scaffold_18000006, |26078|e_gw1.18.163.1	scaffold_18			jgi|Coc_C169_1|36900|fgenesh1_pm.9_#_157, |34920|fgenesh1_pm.1_#_261	scaffold_9,1	3032_2_, 268_1_CBOZ_CBPA	Ot06g00700, Ot11g01200	OSTLU_26437, 40897	MICPUN_106331, 80273	MICPUCDRAFT_45807, 49612	VOLCADRAFT_55771, 76291
[KO:K01431]	3.5.1.6	beta-ureidopropionase	CHLREDRAFT_157234		H632_c2271p0	contig-2271	a53826r42		jgi|ChlNC64A_1|140469|IGS.gm_3_00208	scaffold_3	CBPS_CBWC_CBWF_2086_1		jgi|Coc_C169_1|48894|estExt_fgenesh1_pg.C_190027		3916_1_CBOZ_CBPA			MICPUN_107980		VOLCADRAFT_66898
[KO:K01464]	3.5.2.2	dihydropyrimidinase	CHLREDRAFT_97227		H632_c468p1	contig-468	a55886r45		jgi|ChlNC64A_1|7764|gw1.11.57.1	scaffold_11	CBPS_CBWC_CBWF_2247_1		jgi|Coc_C169_1|2928|gw1.1.249.1	scaffold_1	2785_1_CBOZ_CBPA					VOLCADRAFT_60577
[KO:K01578]	4.1.1.9	malonyl-CoA decarboxylase	CHLREDRAFT_206199						jgi|ChlNC64A_1|141775|IGS.gm_38_00038	scaffold_38
[KO:K01918]	6.3.2.1	pantoate--beta-alanine ligase	CHLREDRAFT_97116		H632_c398p1	contig-398	a47527r58		jgi|ChlNC64A_1|133485|IGS.gm_1_00621	scaffold_1			jgi|Coc_C169_1|8261|gw1.3.479.1	scaffold_3		Ot09g02660, Ot17g02400	OSTLU_35160	MICPUN_70764	MICPUCDRAFT_15500	VOLCADRAFT_89713
00450_Selenocompound_metabolism
[KO:K00384]	1.8.1.9	thioredoxin reductase (NADPH)	CHLREDRAFT_132865, 195914, 78928		H632_c195p2, c134p2	contig-195, 1241	a11718r272, a10254r132		jgi|ChlNC64A_1|20550|e_gw1.4.155.1, |16430|gw1.7.309.1, |23746|e_gw1.11.82.1	scaffold_4, 11	CBPS_CBWC_CBWF_1285_1, _1628_0_CBWF3240.g1		jgi|Coc_C169_1|40474|fgenesh1_pg.4_#_123, |1838|gw1.23.26.1, |2983|gw1.4.268.1	scaffold_4, 9	2072_0_CBOZ1858.b1_CBOZ_CBPA, 1119_1_CBOZ_CBPA	Ot01g04150, Ot18g00250	OSTLU_28227, 29046	MICPUN_113706	MICPUCDRAFT_23559, 70201	VOLCADRAFT_107487, 127304
[KO:K00548]	2.1.1.13	5-methyltetrahydrofolate--homocysteine methyltransferase	CHLREDRAFT_76715		H632_c16p2	contig-16	a46488r43		jgi|ChlNC64A_1|49110|fgenesh3_pm.C_scaffold_23000011	scaffold_212	CBPS_CBWC_CBWF_231_1					Ot03g04540	OSTLU_45056	MICPUN_105867	MICPUCDRAFT_45154
[KO:K00958]	2.7.7.4	sulfate adenylyltransferase	CHLREDRAFT_133924, 196910		H632_c211p2	contig-211	a9784r152		jgi|ChlNC64A_1|145209|IGS.gm_9_00016, |21820|e_gw1.6.73.1	scaffold_9			jgi|Coc_C169_1|56657|Genemark1.5686_g	scaffold_12	723_0_CBOZ2461.g1_CBOZ_CBPA	Ot10g00290	OSTLU_37879	MICPUN_97880	MICPUCDRAFT_30508	VOLCADRAFT_81084, 90775
[KO:K01739]	2.5.1.48	cystathionine gamma-synthase	CHLREDRAFT_24268		H632_c3287p0	contig-3287	a24027r118		jgi|ChlNC64A_1|24830|e_gw1.14.83.1	scaffold_14	CBPS_CBWC_CBWF_453_1		jgi|Coc_C169_1|3395|gw1.2.284.1	scaffold_2	3624_2_CBOZ_CBPA	Ot09g01000	OSTLU_17120, 33390	MICPUN_98339	MICPUCDRAFT_25455	VOLCADRAFT_75793
[KO:K01760]	4.4.1.8	cystathionine beta-lyase	CHLREDRAFT_196483		H632_c5p1	contig-5	a45630r67		jgi|ChlNC64A_1|140666|IGS.gm_3_00405	scaffold_3	CBPS_CBWC_CBWF_453_1		jgi|Coc_C169_1|37091|fgenesh1_pm.10_#_179	scaffold_10	2432_1_CBOZ_CBPA	Ot09g02610	OSTLU_88245	MICPUN_96733	MICPUCDRAFT_2994	VOLCADRAFT_68235
[KO:K01874]	6.1.1.10	methionyl-tRNA synthetase	CHLREDRAFT_114761, 97144		H632_c2399p0, c1077p1	contig-2399, 1077	a27643r94, a3628r404		jgi|ChlNC64A_1|16442|gw1.12.510.1, |26593|e_gw1.21.123.1	scaffold_12, 14	CBPS_CBWC_CBWF_1642_1, _489_1		jgi|Coc_C169_1|2138|gw1.1.205.1, |42830|fgenesh1_pg.11_#_38	scaffold_1, 11		Ot04g02830	OSTLU_36966	MICPUN_58148	MICPUCDRAFT_70268	VOLCADRAFT_58186, 82392
[KO:K03341]	2.9.1.2	O-phospho-L-seryl-tRNASec:L-selenocysteinyl-tRNA synthase	CHLREDRAFT_117639						jgi|ChlNC64A_1|19872|e_gw1.3.121.1	scaffold_3			jgi|Coc_C169_1|3382|gw1.2.283.1	scaffold_2			OSTLU_35440	MICPUN_56124	MICPUCDRAFT_16680	VOLCADRAFT_66969
[KO:K10837]	2.7.1.164	O-phosphoseryl-tRNA(Sec) kinase	CHLREDRAFT_206160						jgi|ChlNC64A_1|140755|IGS.gm_3_00494	scaffold_3			jgi|Coc_C169_1|62949|Genemark1.3732_g			Ot09g01870		MICPUN_64194
[KO:K11717]	2.8.1.7; 4.4.1.16	cysteine desulfurase / selenocysteine lyase	CHLREDRAFT_196776		H632_c1458p0	contig-2800	a20782r146		jgi|ChlNC64A_1|9161|gw1.5.165.1	scaffold_5	CBPS_CBWC_CBWF_779_1		jgi|Coc_C169_1|37143|fgenesh1_pm.11_#_40	scaffold_11		Ot03g03050	OSTLU_19438	MICPUN_78629	MICPUCDRAFT_38219	VOLCADRAFT_63817
00480_Glutathione_metabolism
[KO:K00031]	1.1.1.42	isocitrate dehydrogenase	CHLREDRAFT_196567		H632_c51p2	contig-51	a4695r496		jgi|ChlNC64A_1|55969|estExt_fgenesh3_pm.C_20016	scaffold_2	CBPS_CBWC_CBWF_1646_1		jgi|Coc_C169_1|25423|estExt_Genewise1.C_160127				OSTLU_47417			VOLCADRAFT_77629
[KO:K00033]	1.1.1.44	6-phosphogluconate dehydrogenase	CHLREDRAFT_192597		H632_c888p0	contig-888	a8276r350		jgi|ChlNC64A_1|143099|IGS.gm_5_00428	scaffold_5	CBPS_CBWC_CBWF_1987_1		jgi|Coc_C169_1|52491|estExt_fgenesh1_pm.C_20282	scaffold_16	4513_0_CBOZ2228.b1_CBOZ_CBPA	Ot07g04130	OSTLU_32825	MICPUN_94461	MICPUCDRAFT_28256	VOLCADRAFT_109207
[KO:K00036]	1.1.1.49	glucose-6-phosphate 1-dehydrogenase	CHLREDRAFT_119861, 173841		H632_c155p0, c716p1	contig-716	a17089r179, a29790r105		jgi|ChlNC64A_1|36394|estExt_Genewise1Plus.C_160203, |52690|fgenesh3_pg.C_scaffold_12000015	scaffold_16, 12	CBPS_CBWC_CBWF_490_1, _490_0_CBWC2042.g1		jgi|Coc_C169_1|36636|fgenesh1_pm.8_#_36, |52161|estExt_fgenesh1_pm.C_10150	scaffold_1, 10	1258_1_CBOZ_CBPA, 1117_0_CBOZ1747.b1_CBOZ_CBPA	Ot05g04760	OSTLU_45668	MICPUN_104959, 78783, 86118	MICPUCDRAFT_15872, 18868, 49510	VOLCADRAFT_82038
[KO:K00383]	1.8.1.7	glutathione reductase (NADPH)	CHLREDRAFT_134165		H632_c134p2	contig-1241	a2776r337		jgi|ChlNC64A_1|54050|fgenesh3_pg.C_scaffold_19000075	scaffold_19	CBPS_CBWC_CBWF_1285_1		jgi|Coc_C169_1|3201|gw1.9.133.1	scaffold_9	1119_1_CBOZ_CBPA	Ot02g00200	OSTLU_24082	MICPUN_91929	MICPUCDRAFT_45738	VOLCADRAFT_106582, 78818
[KO:K00432]	1.11.1.9	glutathione peroxidase	CHLREDRAFT_137012, 143122		H632_c1148p0	contig-1148	a1845r574		jgi|ChlNC64A_1|48312|fgenesh3_kg.C_scaffold_24000002	scaffold_24	CBPS_CBWC_CBWF_1055_1		jgi|Coc_C169_1|18129|e_gw1.14.261.1, |8207|gw1.14.261.1	scaffold_14	2679_1_CBOZ_CBPA	Ot08g00440, Ot08g03350	OSTLU_12779	MICPUN_112672, 112674, 112675	MICPUCDRAFT_70206, 70209	VOLCADRAFT_109762, 79644
[KO:K00434]	1.11.1.11	L-ascorbate peroxidase	CHLREDRAFT_165193, 186597, 205910		H632_c128p2	contig-128	a358r1518		jgi|ChlNC64A_1|48220|fgenesh3_kg.C_scaffold_11000004, |19254|e_gw1.2.308.1, |55511|fgenesh3_pg.C_scaffold_38000015	scaffold_11, 2, 38	CBPS_CBWC_CBWF_52_1, _0_0_CBWF7149.g1		jgi|Coc_C169_1|61520|Genemark1.2310_g, |38539|fgenesh1_pm.22_#_42, |6537|gw1.18.178.1	scaffold_4, 18	3509_1_, 529_1_CBOZ_CBPA	Ot01g03570, Ot08g00200, Ot09g00500	OSTLU_32890, 6186, 93205	MICPUN_109237, 51963, 70664	MICPUCDRAFT_48214, 56164, 8305	VOLCADRAFT_105827, 62034, 82395
[KO:K00797]	2.5.1.16	spermidine synthase	CHLREDRAFT_206050, 206069		H632_c251p1	contig-251	a20338r102		jgi|ChlNC64A_1|49023|fgenesh3_pm.C_scaffold_18000006, |26078|e_gw1.18.163.1	scaffold_18			jgi|Coc_C169_1|36900|fgenesh1_pm.9_#_157, |34920|fgenesh1_pm.1_#_261	scaffold_9,1	3032_2_, 268_1_CBOZ_CBPA	Ot06g00700, Ot11g01200	OSTLU_26437, 40897	MICPUN_106331, 80273	MICPUCDRAFT_45807, 49612	VOLCADRAFT_55771, 76291
[KO:K00799]	2.5.1.18	glutathione S-transferase	CHLREDRAFT_146799, 154723, 167675, 194224, 194226		H632_c1125p1, c3353p0, c117p2	contig-3353, 117	a26016r149, a60253r75, a3441r425		jgi|ChlNC64A_1|136945|IGS.gm_18_00051, |135580|IGS.gm_14_00113, |51671|fgenesh3_pg.C_scaffold_7000218, |142000|IGS.gm_4_00141	scaffold_18, 7, 4	CBPS_CBWC_CBWF_2921_1, _2599_1, _0_0_CBWF5053.b1		jgi|Coc_C169_1|53417|estExt_fgenesh1_pm.C_70146, |35701|fgenesh1_pm.4_#_103, |44065|fgenesh1_pg.16_#_44	scaffold_7, 4, 1	2243_1_, 706_1_, 102_1_CBOZ_CBPA	Ot01g00130, Ot02g02800, Ot04g03500, Ot05g04450, Ot08g02420, Ot12g02440, Ot16g00420	OSTLU_15097, 26895, 27416, 27489, 32351, 40218, 4835, 87377	MICPUN_107846, 107847, 55589, 55730, 57842, 60199, 62817, 64509, 73823	MICPUCDRAFT_17892, 23315, 4004, 47673, 49816, 58175, 59893	VOLCADRAFT_107623, 56687, 89757, 95137
[KO:K01255]	3.4.11.1	leucyl aminopeptidase	CHLREDRAFT_82208		H632_c3545p0	contig-3545	a19087r137		jgi|ChlNC64A_1|19050|e_gw1.2.50.1	scaffold_2	CBPS_CBWC_CBWF_557_1		jgi|Coc_C169_1|2933|gw1.17.73.1	scaffold_17		Ot05g01900	OSTLU_2836	MICPUN_58311	MICPUCDRAFT_32662	VOLCADRAFT_106122
[KO:K01256]	3.4.11.2	aminopeptidase N	CHLREDRAFT_132291		H632_c77p1	contig-77	a13077r223		jgi|ChlNC64A_1|50467|fgenesh3_pg.C_scaffold_3000340	scaffold_3			jgi|Coc_C169_1|36068|fgenesh1_pm.5_#_167	scaffold_5		Ot13g02610	OSTLU_36617	MICPUN_97583	MICPUCDRAFT_45513	VOLCADRAFT_81369
[KO:K01469]	3.5.2.9	5-oxoprolinase (ATP-hydrolysing)	CHLREDRAFT_123233		H632_c309p2	contig-309	a17963r74		jgi|ChlNC64A_1|48777|fgenesh3_pm.C_scaffold_9000010	scaffold_9	CBPS_CBWC_CBWF_829_0_CBWC3201.b1		jgi|Coc_C169_1|11457|e_gw1.1.10.1	scaffold_1		Ot06g02310	OSTLU_12616	MICPUN_113348	MICPUCDRAFT_51932	VOLCADRAFT_61291
[KO:K01581]	4.1.1.17	ornithine decarboxylase	CHLREDRAFT_206067		H632_c251p2	contig-4005	a75157r45		jgi|ChlNC64A_1|133981|IGS.gm_10_00272	scaffold_10	CBPS_CBWC_CBWF_683_2		jgi|Coc_C169_1|2483|gw1.24.15.1	scaffold_24	3162_1_CBOZ_CBPA	Ot04g04130	OSTLU_31322			VOLCADRAFT_63034
[KO:K01919]	6.3.2.2	glutamate--cysteine ligase	CHLREDRAFT_181975		H632_c1387p0	contig-1387	a4772r684		jgi|ChlNC64A_1|26622|e_gw1.21.61.1	scaffold_21			jgi|Coc_C169_1|4378|gw1.10.226.1	scaffold_17	3829_1_CBOZ_CBPA		OSTLU_41198	MICPUN_84113	MICPUCDRAFT_35630	VOLCADRAFT_104352
[KO:K01920]	6.3.2.3	glutathione synthase	CHLREDRAFT_189020		H632_c1597p1	contig-1597	a72197r25		jgi|ChlNC64A_1|24019|e_gw1.12.94.1	scaffold_12			jgi|Coc_C169_1|2772|gw1.1.245.1	scaffold_2	1988_0_CBOZ3061.b1_CBOZ_CBPA	Ot06g01620	OSTLU_32080	MICPUN_108131	MICPUCDRAFT_18089	VOLCADRAFT_76898
[KO:K10807]	1.17.4.1	ribonucleoside-diphosphate reductase subunit M1	CHLREDRAFT_185583		H632_c114p0	contig-114	a3598r422		jgi|ChlNC64A_1|6534|gw1.26.15.1	scaffold_26	CBPS_CBWC_CBWF_709_1		jgi|Coc_C169_1|38039|fgenesh1_pm.17_#_68	scaffold_22	529_1_CBOZ_CBPA	Ot01g00100	OSTLU_48569	MICPUN_93299	MICPUCDRAFT_31349	VOLCADRAFT_82353
[KO:K10808]	1.17.4.1	ribonucleoside-diphosphate reductase subunit M2	CHLREDRAFT_144621, 188785		H632_c60p0	contig-60	a12243r219		jgi|ChlNC64A_1|9969|gw1.3.246.1, |34103|estExt_Genewise1Plus.C_30356	scaffold_20, 3	CBPS_CBWC_CBWF_0_0_CBWC1270.b1		jgi|Coc_C169_1|36138|fgenesh1_pm.5_#_237, |5739|gw1.4.520.1	scaffold_4, 1	3509_1_CBOZ_CBPA, 5023_0_CBOZ7533.b1_CBOZ_CBPA	Ot12g01290	OSTLU_32923, 39468	MICPUN_91276, 94589	MICPUCDRAFT_33344, 45157	VOLCADRAFT_101784, 109884
00500_Starch_and_sucrose_metabolism
[KO:K00012]	1.1.1.22	UDPglucose 6-dehydrogenase	CHLREDRAFT_185081, 205498		H632_c46p3	contig-46	a4671r956		jgi|ChlNC64A_1|48169|fgenesh3_kg.C_scaffold_5000013	scaffold_5	CBPS_CBWC_CBWF_1325_1		jgi|Coc_C169_1|37020|fgenesh1_pm.10_#_108, |3116|gw1.10.150.1	scaffold_10	1745_1_CBOZ_CBPA	Ot13g01740	OSTLU_27143, 29766	MICPUN_91087	MICPUCDRAFT_35067	VOLCADRAFT_107492, 72551
[KO:K00688]	2.4.1.1	starch phosphorylase	CHLREDRAFT_137300		H632_c1593p0	contig-1593	a29331r78		jgi|ChlNC64A_1|6440|gw1.23.19.1	scaffold_350	CBPS_CBWC_CBWF_3732_0_CBWF1520.g1		jgi|Coc_C169_1|35130|fgenesh1_pm.2_#_140	scaffold_2	1002_1_CBOZ_CBPA	Ot04g02110, Ot11g00280, Ot11g01020	OSTLU_14998, 25192, 44172	MICPUN_104969, 104976, 87288	MICPUCDRAFT_35182, 35264, 49649	VOLCADRAFT_89705
[KO:K00696]	2.4.1.14	sucrose-phosphate synthase	CHLREDRAFT_105328		H632_c2586p0	contig-2586	a28697r74		jgi|ChlNC64A_1|24913|e_gw1.14.60.1	scaffold_14	CBPS_CBWC_CBWF_1208_1		jgi|Coc_C169_1|37202|fgenesh1_pm.11_#_99	scaffold_11						VOLCADRAFT_57787
[KO:K00700]	2.4.1.18	1,4-alpha-glucan branching enzyme	CHLREDRAFT_118976, 94079		H632_c603p0	contig-603	a19933r58		jgi|ChlNC64A_1|49557|fgenesh3_pg.C_scaffold_1000255, |34273|estExt_Genewise1Plus.C_30732	scaffold_1, 3	CBPS_CBWC_CBWF_380_1		jgi|Coc_C169_1|52862|estExt_fgenesh1_pm.C_40191, |54622|estExt_fgenesh1_pm.C_190001	scaffold_4, 19	3682_0_CBOZ4767.g1_CBOZ_CBPA, 2662_1_CBOZ_CBPA	Ot03g00840, Ot04g04110	OSTLU_31320, 45076	MICPUN_51374	MICPUCDRAFT_19221, 49461	VOLCADRAFT_62803, 78904, 83180
[KO:K00703]	2.4.1.21	starch synthase	CHLREDRAFT_183277, 185710, 191662, 205622		H632_c3298p0, c181p4	contig-181	a53712r41, a37963r108		jgi|ChlNC64A_1|6735|gw1.1.38.1, |136382|IGS.gm_16_00105, |35670|estExt_Genewise1Plus.C_110406, |6787|gw1.1.48.1	scaffold_1, 16, 11	CBPS_CBWC_CBWF_135_2, _654_1, _135_2, _3341_0_CBWC2843.g1		jgi|Coc_C169_1|40893|fgenesh1_pg.5_#_96, |1128|gw1.28.9.1, |15821|e_gw1.8.17.1, |54469|estExt_fgenesh1_pm.C_160131	scaffold_5, 28, 8, 16	864_1_, 4075_1_CBOZ_CBPA	Ot13g01230, Ot13g01250, Ot16g02790	OSTLU_40458, 41777, 41853, 48511	MICPUN_104780, 104862, 104863, 105006, 66536, 88745	MICPUCDRAFT_29784, 33450, 44605, 46038, 47271	VOLCADRAFT_103172, 108446, 58732
[KO:K00705]	2.4.1.25	4-alpha-glucanotransferase	CHLREDRAFT_122203, 140452			contig-2909	a305363r19		jgi|ChlNC64A_1|54206|fgenesh3_pg.C_scaffold_20000079, |7265|gw1.6.34.1	scaffold_20, 6	CBPS_CBWC_CBWF_353_1		jgi|Coc_C169_1|47303|estExt_fgenesh1_pg.C_70107, |41809|fgenesh1_pg.7_#_213	scaffold_7	2949_1_, 191_1_CBOZ_CBPA	Ot02g05750, Ot11g02290, Ot11g02300	OSTLU_44388, 44779	MICPUN_86873, 89545	MICPUCDRAFT_20445, 25076	VOLCADRAFT_107405, 56349
[KO:K00706]	2.4.1.34	1,3-beta-glucan synthase	CHLREDRAFT_143511, 144973, 147446		H632_c874p0	contig-874	a504835r8		jgi|ChlNC64A_1|52079|fgenesh3_pg.C_scaffold_9000104	scaffold_9
[KO:K00844]	2.7.1.1	hexokinase	CHLREDRAFT_21582						jgi|ChlNC64A_1|53259|fgenesh3_pg.C_scaffold_14000169	scaffold_14			jgi|Coc_C169_1|52463|estExt_fgenesh1_pm.C_20245	scaffold_2	3606_2_CBOZ_CBPA					VOLCADRAFT_67129
[KO:K00963]	2.7.7.9	UTP--glucose-1-phosphate uridylyltransferase	CHLREDRAFT_157049																	VOLCADRAFT_105295
[KO:K00975]	2.7.7.27	glucose-1-phosphate adenylyltransferase	CHLREDRAFT_136037, 205913		H632_c38p2, c118p2	contig-38, 118	a52938r67		jgi|ChlNC64A_1|37653|estExt_Genewise1Plus.C_380009, |56418|estExt_fgenesh3_pm.C_380003	scaffold_1, 38	CBPS_CBWC_CBWF_547_1		jgi|Coc_C169_1|41408|fgenesh1_pg.6_#_211, |36002|fgenesh1_pm.5_#_101	scaffold_5	1686_1_CBOZ_CBPA	Ot07g02930, Ot20g00490	OSTLU_35780, 42209	MICPUN_60100, 78097	MICPUCDRAFT_31569, 49393	VOLCADRAFT_75183, 76956
[KO:K01087]	3.1.3.12	trehalose 6-phosphate phosphatase	CHLREDRAFT_60124		H632_c560p1	contig-560	a32125r71		jgi|ChlNC64A_1|136876|IGS.gm_17_00280	scaffold_17			jgi|Coc_C169_1|61192|Genemark1.2003_g	scaffold_3	3697_1_CBOZ_CBPA	Ot14g00340	OSTLU_43599	MICPUN_109378	MICPUCDRAFT_53489	VOLCADRAFT_43532
[KO:K01177]	3.2.1.2	beta-amylase	CHLREDRAFT_183141						jgi|ChlNC64A_1|134683|IGS.gm_12_00069	scaffold_12	CBPS_CBWC_CBWF_142_2		jgi|Coc_C169_1|2110|gw1.25.17.1	scaffold_25	3677_2_CBOZ_CBPA			MICPUN_96665	MICPUCDRAFT_21290
[KO:K01193]	3.2.1.26	beta-fructofuranosidase	CHLREDRAFT_94247		H632_c1726p0	contig-1726	a39272r59		jgi|ChlNC64A_1|138599|IGS.gm_21_00078	scaffold_16	CBPS_CBWC_CBWF_2741_1		jgi|Coc_C169_1|21710|estExt_Genewise1.C_20249	scaffold_1	1500_1_CBOZ_CBPA					VOLCADRAFT_34733
[KO:K01194]	3.2.1.28	alpha,alpha-trehalase	CHLREDRAFT_195672		H632_c2113p0	contig-2113	a45856r50		jgi|ChlNC64A_1|7571|gw1.13.22.1	scaffold_1			jgi|Coc_C169_1|16864|e_gw1.11.343.1	scaffold_11		Ot05g04440	OSTLU_38852	MICPUN_82031	MICPUCDRAFT_1967	VOLCADRAFT_77459
[KO:K01810]	5.3.1.9	glucose-6-phosphate isomerase	CHLREDRAFT_135220		H632_c814p1	contig-814	a10179r108		jgi|ChlNC64A_1|135927|IGS.gm_15_00023	scaffold_2			jgi|Coc_C169_1|46430|estExt_fgenesh1_pg.C_30207	scaffold_3	995_1_CBOZ_CBPA	Ot11g02980	OSTLU_17428	MICPUN_104983	MICPUCDRAFT_20452	VOLCADRAFT_103185
[KO:K01835]	5.4.2.2	phosphoglucomutase	CHLREDRAFT_146213, 81483		H632_c1323p0	contig-1323	a6467r182		jgi|ChlNC64A_1|35765|estExt_Genewise1Plus.C_120203, |36032|estExt_Genewise1Plus.C_140114	scaffold_12, 14	CBPS_CBWC_CBWF, _875_1_3668_0_CBWC7715.b1		jgi|Coc_C169_1|17632|e_gw1.12.65.1	scaffold_12	3984_1_CBOZ_CBPA	Ot15g02630	OSTLU_42958	MICPUN_112722	MICPUCDRAFT_70805	VOLCADRAFT_78928
[KO:K02438]	3.2.1.-	glycogen operon protein	CHLREDRAFT_132067, 496		H632_c1029p0, c678p0	contig-1029, 678	a33364r90, a54881r53		jgi|ChlNC64A_1|34754|estExt_Genewise1Plus.C_50450, |58311|estExt_fgenesh3_pg.C_140177	scaffold_5, 14	CBPS_CBWC_CBWF, _1210_1_3298_0_CBWC2075.b1		jgi|Coc_C169_1|38283|fgenesh1_pm.19_#_105, |11997|e_gw1.2.79.1	scaffold_19, 2	3201_1_, 2022_2_CBOZ_CBPA	Ot12g00310, Ot14g02550	OSTLU_19757, 43578	MICPUN_105010, 106402	MICPUCDRAFT_45924, 70243	VOLCADRAFT_117715, 69514
[KO:K08679]	5.1.3.6	UDP-glucuronate 4-epimerase	CHLREDRAFT_151368		H632_c1103p0	contig-1103	a5607r372		jgi|ChlNC64A_1|10004|gw1.3.251.1		CBPS_CBWC_CBWF_252_3		jgi|Coc_C169_1|35423|fgenesh1_pm.3_#_98		2720_1_CBOZ_CBPA	Ot02g07320	OSTLU_14357	MICPUN_84789	MICPUCDRAFT_45692	VOLCADRAFT_127350
[KO:K16055]	2.4.1.15; 3.1.3.12	trehalose 6-phosphate synthase/phosphatase	CHLREDRAFT_131610		H632_c13p1	contig-13	a33564r120		jgi|ChlNC64A_1|6552|gw1.9.23.1	scaffold_9	CBPS_CBWC_CBWF_96_2		jgi|Coc_C169_1|34928|fgenesh1_pm.1_#_269	scaffold_1		Ot01g02410, Ot12g02420	OSTLU_51081, 991	MICPUN_54984, 60246	MICPUCDRAFT_12941, 70807	VOLCADRAFT_54993
00510_N-Glycan_biosynthesis
[KO:K00721]	2.4.1.83	dolichol-phosphate mannosyltransferase	CHLREDRAFT_138210		H632_c211p0	contig-211	a10280r259		jgi|ChlNC64A_1|17366|gw1.6.387.1	scaffold_6			jgi|Coc_C169_1|7154|gw1.21.160.1	scaffold_21	735_1_CBOZ_CBPA	Ot07g04460	OSTLU_32856	MICPUN_97002	MICPUCDRAFT_49578	VOLCADRAFT_80923
[KO:K00729]	2.4.1.117	dolichyl-phosphate beta-glucosyltransferase	CHLREDRAFT_18353		H632_c50p0	contig-50	a8695r426		jgi|ChlNC64A_1|9771|gw1.26.128.1	scaffold_26	CBPS_CBWC_CBWF_3843_0_CBWF4233.b1		jgi|Coc_C169_1|45687|fgenesh1_pg.29_#_3	scaffold_29	2463_1_CBOZ_CBPA					VOLCADRAFT_92792
[KO:K01001]	2.7.8.15	UDP-N-acetylglucosamine--dolichyl-phosphate N-acetylglucosaminephosphotransferase	CHLREDRAFT_139119		H632_c981p0	contig-981	a38674r112		jgi|ChlNC64A_1|27639|e_gw1.26.89.1	scaffold_26			jgi|Coc_C169_1|18652|e_gw1.15.111.1	scaffold_15	3766_1_CBOZ_CBPA	Ot13g00590	OSTLU_17763	MICPUN_108192	MICPUCDRAFT_14927	VOLCADRAFT_91192
[KO:K01228]	3.2.1.106	mannosyl-oligosaccharide glucosidase	CHLREDRAFT_113687		H632_c1047p1	contig-1047	a7829r141		jgi|ChlNC64A_1|20925|e_gw1.5.26.1	scaffold_5			jgi|Coc_C169_1|693|gw1.4.52.1	scaffold_4	2111_1_CBOZ_CBPA					VOLCADRAFT_58521
[KO:K01230]	3.2.1.113	mannosyl-oligosaccharide alpha-1,2-mannosidase	CHLREDRAFT_178232		H632_c987p0	contig-987	a2745r375		jgi|ChlNC64A_1|133855|IGS.gm_10_00146	scaffold_1	CBPS_CBWC_CBWF_238_0_CBWC5015.b1		jgi|Coc_C169_1|57722|Genemark1.6751_g	scaffold_15	3873_2_CBOZ_CBPA	Ot16g01030	OSTLU_1811	MICPUN_109216, 112689	MICPUCDRAFT_15822, 18963
[KO:K03842]	2.4.1.142	beta-1,4-mannosyltransferase	CHLREDRAFT_108570		H632_c3221p0	contig-3221	a311338r18		jgi|ChlNC64A_1|16669|gw1.4.550.1	scaffold_4			jgi|Coc_C169_1|13297|e_gw1.4.290.1	scaffold_4		Ot16g02160	OSTLU_18368	MICPUN_68238	MICPUCDRAFT_2692	VOLCADRAFT_57730
[KO:K03843]	2.4.1.132; 2.4.1.257	alpha-1,3/alpha-1,6-mannosyltransferase	CHLREDRAFT_122195			contig-82	a92798r42		jgi|ChlNC64A_1|16862|gw1.3.703.1	scaffold_3	CBPS_CBWC_CBWF_2891_1		jgi|Coc_C169_1|4143|gw1.2.350.1	scaffold_2		Ot02g01680	OSTLU_119517	MICPUN_113380	MICPUCDRAFT_70800	VOLCADRAFT_67522
[KO:K03844]	2.4.1.131	alpha-1,2-mannosyltransferase	CHLREDRAFT_19999		H632_c2507p0	contig-2507	a29864r216		jgi|ChlNC64A_1|53237|fgenesh3_pg.C_scaffold_14000147	scaffold_14	CBPS_CBWC_CBWF_3511_0_CBWC5357.b1		jgi|Coc_C169_1|37526|fgenesh1_pm.13_#_94	scaffold_13	0_0_CBOZ3482.b1_CBOZ_CBPA		OSTLU_35087	MICPUN_64090	MICPUCDRAFT_62070	VOLCADRAFT_103930
[KO:K03848]	2.4.1.267	alpha-1,3-glucosyltransferase	CHLREDRAFT_36194		H632_c136p0	contig-136	a40682r61		jgi|ChlNC64A_1|19730|e_gw1.3.136.1	scaffold_3			jgi|Coc_C169_1|21928|estExt_Genewise1.C_20612	scaffold_2	4541_0_CBOZ2573.b1_CBOZ_CBPA			MICPUN_67658	MICPUCDRAFT_35078	VOLCADRAFT_62003
[KO:K03849]	2.4.1.265	alpha-1,3-glucosyltransferase	CHLREDRAFT_104640		H632_c677p1	contig-677	a37664r56		jgi|ChlNC64A_1|23571|e_gw1.11.74.1	scaffold_11			jgi|Coc_C169_1|2923|gw1.29.5.1	scaffold_29	4541_0_CBOZ2573.b1_CBOZ_CBPA			MICPUN_58254	MICPUCDRAFT_32727	VOLCADRAFT_67408
[KO:K05546]	3.2.1.84	alpha 1,3-glucosidase	CHLREDRAFT_128630		H632_c1395p0	contig-1395	a31766r99		jgi|ChlNC64A_1|139544|IGS.gm_25_00095	scaffold_25	CBPS_CBWC_CBWF_1168_0_CBWC729.b1		jgi|Coc_C169_1|18351|e_gw1.14.310.1	scaffold_14	1063_1_CBOZ_CBPA	Ot08g02780	OSTLU_429	MICPUN_84555	MICPUCDRAFT_27057	VOLCADRAFT_60238
[KO:K06316]	---	oligosaccharidyl-lipid flippase family	CHLREDRAFT_178966				a34882r35		jgi|ChlNC64A_1|58031|estExt_fgenesh3_pg.C_120021	scaffold_12	CBPS_CBWC_CBWF_0_0_CBWC4215.b1		jgi|Coc_C169_1|16862|e_gw1.11.353.1	scaffold_11	1011_1_CBOZ_CBPA	Ot04g01520	OSTLU_31069	MICPUN_60665		VOLCADRAFT_97866
[KO:K07151]	2.4.99.18	dolichyl-diphosphooligosaccharide--protein glycosyltransferase	CHLREDRAFT_127991		H632_c217p0	contig-217	a10614r229		jgi|ChlNC64A_1|6679|gw1.11.20.1	scaffold_11	CBPS_CBWC_CBWF_385_2		jgi|Coc_C169_1|52936|estExt_fgenesh1_pm.C_40289	scaffold_4	3891_0_CBOZ470.b1_CBOZ_CBPA	Ot05g02940	OSTLU_49512	MICPUN_94195	MICPUCDRAFT_32514, 691	VOLCADRAFT_66117, 83836
[KO:K07252]	3.6.1.43	dolichyldiphosphatase	CHLREDRAFT_194530						jgi|ChlNC64A_1|135976|IGS.gm_15_00072							Ot10g00830	OSTLU_94805	MICPUN_105810, 107908	MICPUCDRAFT_31954, 50479	VOLCADRAFT_68065
[KO:K07432]	2.4.1.141	beta-1,4-N-acetylglucosaminyltransferase	CHLREDRAFT_182754		H632_c546p2	contig-546	a25565r151		jgi|ChlNC64A_1|142370|IGS.gm_4_00511	scaffold_4	CBPS_CBWC_CBWF_155_2		jgi|Coc_C169_1|35703|fgenesh1_pm.4_#_105	scaffold_4		Ot10g00370	OSTLU_8530	MICPUN_79960	MICPUCDRAFT_33783	VOLCADRAFT_80368
[KO:K07441]	2.4.1.141	beta-1,4-N-acetylglucosaminyltransferase	CHLREDRAFT_177895		H632_c564p2	contig-564	a3285r621		jgi|ChlNC64A_1|140080|IGS.gm_28_00111	scaffold_28				scaffold_1			OSTLU_43197, 43228	MICPUN_113584	MICPUCDRAFT_26128	VOLCADRAFT_98502
[KO:K09659]	---	dolichyl-phosphate mannosyltransferase polypeptide 3	CHLREDRAFT_191380															MICPUN_62656	MICPUCDRAFT_60003
[KO:K12666]	---	oligosaccharyltransferase complex subunit alpha (ribophorin I)	CHLREDRAFT_131340		H632_c132p1	contig-132	a5781r942		jgi|ChlNC64A_1|8488|gw1.25.38.1	scaffold_25			jgi|Coc_C169_1|2280|gw1.3.138.1	scaffold_3	2075_1_CBOZ_CBPA					VOLCADRAFT_103748
[KO:K12667]	---	oligosaccharyltransferase complex subunit delta (ribophorin II)	CHLREDRAFT_175668				a15114r106		jgi|ChlNC64A_1|135274|IGS.gm_13_00202		CBPS_CBWC_CBWF_2662_1		jgi|Coc_C169_1|44232|fgenesh1_pg.16_#_211	scaffold_16						VOLCADRAFT_103997
[KO:K12668]	---	oligosaccharyltransferase complex subunit epsilon	CHLREDRAFT_141763		H632_c2675p0	contig-2675	a6384r344		jgi|ChlNC64A_1|139907|IGS.gm_27_00085	scaffold_27			jgi|Coc_C169_1|65281|estExt_Genemark1.C_40492	scaffold_4	1409_1_CBOZ_CBPA					VOLCADRAFT_85655
[KO:K12669]	---	oligosaccharyltransferase complex subunit gamma	CHLREDRAFT_196082		H632_c673p1	contig-673	a8082r213		jgi|ChlNC64A_1|48174|fgenesh3_kg.C_scaffold_5000018		CBPS_CBWC_CBWF_2545_1		jgi|Coc_C169_1|37719|fgenesh1_pm.14_#_153	scaffold_14	3821_1_CBOZ_CBPA					VOLCADRAFT_105485
[KO:K12670]	---	oligosaccharyltransferase complex subunit beta	CHLREDRAFT_121156		H632_c2735p0	contig-2735	a2334r673		jgi|ChlNC64A_1|53159|fgenesh3_pg.C_scaffold_14000069	scaffold_14			jgi|Coc_C169_1|37410|fgenesh1_pm.12_#_153	scaffold_12	430_2_CBOZ_CBPA					VOLCADRAFT_72245
00520_Amino_sugar_and_nucleotide_sugar_metabolism
[KO:K00012]	1.1.1.22	UDPglucose 6-dehydrogenase	CHLREDRAFT_185081, 205498		H632_c46p3	contig-46	a4671r956		jgi|ChlNC64A_1|48169|fgenesh3_kg.C_scaffold_5000013	scaffold_5	CBPS_CBWC_CBWF_1325_1		jgi|Coc_C169_1|37020|fgenesh1_pm.10_#_108, |3116|gw1.10.150.1	scaffold_10	1745_1_CBOZ_CBPA	Ot13g01740	OSTLU_27143, 29766	MICPUN_91087	MICPUCDRAFT_35067	VOLCADRAFT_107492, 72551
[KO:K00326]	1.6.2.2	cytochrome-b5 reductase	CHLREDRAFT_163751		H632_c464p1	contig-464	a14131r143		jgi|ChlNC64A_1|28364|e_gw1.34.21.1	scaffold_34	CBPS_CBWC_CBWF_1165_1		jgi|Coc_C169_1|36711|fgenesh1_pm.8_#_111	scaffold_8	288_1_CBOZ_CBPA	Ot11g01790	OSTLU_38305, 6009	MICPUN_63089	MICPUCDRAFT_35319	VOLCADRAFT_107549, 74532
[KO:K00621]	2.3.1.4	glucosamine-phosphate N-acetyltransferase	CHLREDRAFT_165420		H632_c271p1	contig-271	a4687r560		jgi|ChlNC64A_1|50133|fgenesh3_pg.C_scaffold_3000006	scaffold_3	CBPS_CBWC_CBWF_3228_1		jgi|Coc_C169_1|17540|e_gw1.12.422.1	scaffold_12		Ot02g05200	OSTLU_8888	MICPUN_61070	MICPUCDRAFT_8680	VOLCADRAFT_47170
[KO:K00820]	2.6.1.16	glucosamine--fructose-6-phosphate aminotransferase (isomerizing)	CHLREDRAFT_118046		H632_c2794p0	contig-2794	a3771r284		jgi|ChlNC64A_1|25756|e_gw1.17.111.1	scaffold_17	CBPS_CBWC_CBWF_2170_1		jgi|Coc_C169_1|13632|e_gw1.4.114.1	scaffold_4	2954_1_CBOZ_CBPA	Ot05g04140	OSTLU_31870	MICPUN_93714	MICPUCDRAFT_25777	VOLCADRAFT_105759
[KO:K00844]	2.7.1.1	hexokinase	CHLREDRAFT_21582						jgi|ChlNC64A_1|53259|fgenesh3_pg.C_scaffold_14000169	scaffold_14			jgi|Coc_C169_1|52463|estExt_fgenesh1_pm.C_20245	scaffold_2	3606_2_CBOZ_CBPA					VOLCADRAFT_67129
[KO:K00849]	2.7.1.6	galactokinase	CHLREDRAFT_122621		H632_c8p0	contig-8	a19734r91		jgi|ChlNC64A_1|16515|gw1.5.568.1	scaffold_5	CBPS_CBWC_CBWF_246_1		jgi|Coc_C169_1|43724|fgenesh1_pg.14_#_139	scaffold_14	5071_0_CBOZ8010.b1_CBOZ_CBPA	Ot04g01590	OSTLU_31076	MICPUN_60667, 79406	MICPUCDRAFT_26260	VOLCADRAFT_98854
[KO:K00963]	2.7.7.9	UTP--glucose-1-phosphate uridylyltransferase	CHLREDRAFT_157049																	VOLCADRAFT_105295
[KO:K00966]	2.7.7.13	mannose-1-phosphate guanylyltransferase	CHLREDRAFT_130417		H632_c3685p0	contig-3685	a5016r657		jgi|ChlNC64A_1|133102|IGS.gm_1_00238	scaffold_1			jgi|Coc_C169_1|34950|fgenesh1_pm.1_#_291	scaffold_1	1923_1_CBOZ_CBPA					VOLCADRAFT_81984
[KO:K00972]	2.7.7.23	UDP-N-acetylglucosamine pyrophosphorylase	CHLREDRAFT_101274				a32579r90		jgi|ChlNC64A_1|36144|estExt_Genewise1Plus.C_140375	scaffold_14	CBPS_CBWC_CBWF_42_1		jgi|Coc_C169_1|2503|gw1.2.212.1	scaffold_2		Ot11g03390	OSTLU_26644	MICPUN_87180	MICPUCDRAFT_48338	VOLCADRAFT_117497
[KO:K00975]	2.7.7.27	glucose-1-phosphate adenylyltransferase	CHLREDRAFT_136037, 205913		H632_c38p2, c118p2	contig-38, 118	a52938r67		jgi|ChlNC64A_1|37653|estExt_Genewise1Plus.C_380009, |56418|estExt_fgenesh3_pm.C_380003	scaffold_1, 38	CBPS_CBWC_CBWF_547_1		jgi|Coc_C169_1|41408|fgenesh1_pg.6_#_211, |36002|fgenesh1_pm.5_#_101	scaffold_5	1686_1_CBOZ_CBPA	Ot07g02930, Ot20g00490	OSTLU_35780, 42209	MICPUN_60100, 78097	MICPUCDRAFT_31569, 49393	VOLCADRAFT_75183, 76956
[KO:K01183]	3.2.1.14	chitinase	CHLREDRAFT_113089						jgi|ChlNC64A_1|136708|IGS.gm_17_00112
[KO:K01784]	5.1.3.2	UDP-glucose 4-epimerase	CHLREDRAFT_139260		H632_c64p0	contig-64	a18401r174		jgi|ChlNC64A_1|48532|fgenesh3_pm.C_scaffold_3000032	scaffold_3	CBPS_CBWC_CBWF_2068_1		jgi|Coc_C169_1|5009|gw1.20.130.1	scaffold_20	3277_1_CBOZ_CBPA	Ot08g01550	OSTLU_42345	MICPUN_83230	MICPUCDRAFT_39596	VOLCADRAFT_77596
[KO:K01809]	5.3.1.8	mannose-6-phosphate isomerase	CHLREDRAFT_196572		H632_c1154p1	contig-1154	a22091r90		jgi|ChlNC64A_1|139231|IGS.gm_24_00011	scaffold_24	CBPS_CBWC_CBWF_3216_0_CBPS447.b1		jgi|Coc_C169_1|30417|estExt_Genewise1Plus.C_140062	scaffold_14	4748_0_CBOZ4902.b1_CBOZ_CBPA	Ot02g06950	OSTLU_3605	MICPUN_86735	MICPUCDRAFT_27865	VOLCADRAFT_65163
[KO:K01810]	5.3.1.9	glucose-6-phosphate isomerase	CHLREDRAFT_135220		H632_c814p1	contig-814	a10179r108		jgi|ChlNC64A_1|135927|IGS.gm_15_00023	scaffold_2			jgi|Coc_C169_1|46430|estExt_fgenesh1_pg.C_30207	scaffold_3	995_1_CBOZ_CBPA	Ot11g02980	OSTLU_17428	MICPUN_104983	MICPUCDRAFT_20452	VOLCADRAFT_103185
[KO:K01835]	5.4.2.2	phosphoglucomutase	CHLREDRAFT_146213, 81483		H632_c1323p0	contig-1323	a6467r182		jgi|ChlNC64A_1|35765|estExt_Genewise1Plus.C_120203, |36032|estExt_Genewise1Plus.C_140114	scaffold_12, 14	CBPS_CBWC_CBWF_875_1, _3668_0_CBWC7715.b1		jgi|Coc_C169_1|17632|e_gw1.12.65.1	scaffold_12	3984_1_CBOZ_CBPA	Ot15g02630	OSTLU_42958	MICPUN_112722	MICPUCDRAFT_70805	VOLCADRAFT_78928
[KO:K01836]	5.4.2.3	phosphoacetylglucosamine mutase	CHLREDRAFT_130104		H632_c692p0	contig-692	a332193r12		jgi|ChlNC64A_1|52755|fgenesh3_pg.C_scaffold_12000080	scaffold_12	CBPS_CBWC_CBWF_0_0_CBWF3534.g1		jgi|Coc_C169_1|20351|e_gw1.22.44.1	scaffold_22		Ot16g01380	OSTLU_40572	MICPUN_104371	MICPUCDRAFT_53084	VOLCADRAFT_82053
[KO:K01840]	5.4.2.8	phosphomannomutase	CHLREDRAFT_350		H632_c1453p0	contig-1453	a3111r1078		jgi|ChlNC64A_1|48382|fgenesh3_pm.C_scaffold_1000005	scaffold_1			jgi|Coc_C169_1|35225|fgenesh1_pm.2_#_235	scaffold_2	999_1_CBOZ_CBPA
[KO:K06118]	3.13.1.1	UDP-sulfoquinovose synthase	CHLREDRAFT_27658			contig-1303	a5607r372		jgi|ChlNC64A_1|49219|fgenesh3_pm.C_scaffold_28000019	scaffold_28	CBPS_CBWC_CBWF_2123_0_CBWF2418.g1		jgi|Coc_C169_1|54720|estExt_fgenesh1_pm.C_200002	scaffold_20	2036_1_CBOZ_CBPA	Ot10g03530	OSTLU_46754	MICPUN_97632	MICPUCDRAFT_24405	VOLCADRAFT_109932
[KO:K08679]	5.1.3.6	UDP-glucuronate 4-epimerase	CHLREDRAFT_151368		H632_c1103p0	contig-1103	a5607r372		jgi|ChlNC64A_1|10004|gw1.3.251.1		CBPS_CBWC_CBWF_252_3		jgi|Coc_C169_1|35423|fgenesh1_pm.3_#_98		2720_1_CBOZ_CBPA	Ot02g07320	OSTLU_14357	MICPUN_84789	MICPUCDRAFT_45692	VOLCADRAFT_127350
[KO:K10046]	5.1.3.18; 5.1.3.-	GDP-D-mannose 3', 5'-epimerase	CHLREDRAFT_196952		H632_c625p1	contig-625	a17190r232		jgi|ChlNC64A_1|34028|estExt_Genewise1Plus.C_30118	scaffold_3	CBPS_CBWC_CBWF_2375_1		jgi|Coc_C169_1|35214|fgenesh1_pm.2_#_224	scaffold_2	112_1_CBOZ_CBPA	Ot18g01190	OSTLU_18701	MICPUN_80077	MICPUCDRAFT_46037	VOLCADRAFT_77112
[KO:K12447]	2.7.7.64	UDP-sugar pyrophosphorylase	CHLREDRAFT_32796		H632_c267p0	contig-267	a34312r117		jgi|ChlNC64A_1|35168|estExt_Genewise1Plus.C_80295	scaffold_8	CBPS_CBWC_CBWF_3442_0_CBWC4261.g1		jgi|Coc_C169_1|53808|estExt_fgenesh1_pm.C_100138	scaffold_10	1383_1_CBOZ_CBPA	Ot13g02120	OSTLU_51241, 52106	MICPUN_106965	MICPUCDRAFT_60817	VOLCADRAFT_120799
[KO:K12450]	4.2.1.76	UDP-glucose 4,6-dehydratase	CHLREDRAFT_111778		H632_c1743p0	contig-139	a5532r410		jgi|ChlNC64A_1|8008|gw1.4.104.1	scaffold_19	CBPS_CBWC_CBWF_0_0_CBWF1653.b1		jgi|Coc_C169_1|5489|gw1.6.230.1	scaffold_16	4556_0_CBOZ2754.b1_CBOZ_CBPA	Ot19g00190		MICPUN_93721	MICPUCDRAFT_32377	VOLCADRAFT_82358
[KO:K12451]	5.1.3.-; 1.1.1.-	3,5-epimerase/4-reductase	CHLREDRAFT_158152		H632_c1041p0	contig-1041			jgi|ChlNC64A_1|132889|IGS.gm_1_00025	scaffold_1	CBPS_CBWC_CBWF_1640_1		jgi|Coc_C169_1|35921|fgenesh1_pm.5_#_20	scaffold_5	1716_1_CBOZ_CBPA					VOLCADRAFT_76853
[KO:K16190]	2.7.1.43	glucuronokinase	CHLREDRAFT_141779		H632_c100p3	contig-100	a710762r7		jgi|ChlNC64A_1|9855|gw1.2.196.1	scaffold_2			jgi|Coc_C169_1|20490|e_gw1.22.84.1	scaffold_22	3742_1_CBOZ_CBPA	Ot06g00050	OSTLU_40817	MICPUN_79463	MICPUCDRAFT_17626
00561_Glycerolipid_metabolism
[KO:K00128]	1.2.1.3	aldehyde dehydrogenase (NAD+)	CHLREDRAFT_135609		H632_c1464p0	contig-1464	a16775r225		jgi|ChlNC64A_1|7731|gw1.1.111.1	scaffold_1	CBPS_CBWC_CBWF_498_1		jgi|Coc_C169_1|2147|gw1.23.34.1	scaffold_23	1093_1_CBOZ_CBPA	Ot01g04160	OSTLU_13873	MICPUN_113300	MICPUCDRAFT_55745	VOLCADRAFT_73567
[KO:K00630]	2.3.1.15	glycerol-3-phosphate O-acyltransferase	CHLREDRAFT_205741		H632_c100p1	contig-100	a11344r153		jgi|ChlNC64A_1|143437|IGS.gm_6_00011				jgi|Coc_C169_1|49064|estExt_fgenesh1_pg.C_210003	scaffold_21	2987_0_CBOZ3946.b1_CBOZ_CBPA	Ot02g00450	OSTLU_119500	MICPUN_106290	MICPUCDRAFT_27830	VOLCADRAFT_81121
[KO:K00655]	2.3.1.51	1-acyl-sn-glycerol-3-phosphate acyltransferase	CHLREDRAFT_174358		H632_c481p1	contig-481	a119434r25		jgi|ChlNC64A_1|10507|gw1.26.150.1	scaffold_26	CBPS_CBWC_CBWF_298_1		jgi|Coc_C169_1|40016|fgenesh1_pg.3_#_77	scaffold_3		Ot07g03180	OSTLU_32744	MICPUN_78992	MICPUCDRAFT_4985	VOLCADRAFT_105609
[KO:K00679]	2.3.1.158	phospholipid:diacylglycerol acyltransferase	CHLREDRAFT_186846										jgi|Coc_C169_1|42925|fgenesh1_pg.11_#_133	scaffold_11	3358_1_CBOZ_CBPA	Ot09g03200	OSTLU_1469	MICPUN_58725	MICPUCDRAFT_58904	VOLCADRAFT_97885
[KO:K00864]	2.7.1.30	glycerol kinase	CHLREDRAFT_128764		H632_c136p2	contig-136	a102351r44		jgi|ChlNC64A_1|50035|fgenesh3_pg.C_scaffold_2000280	scaffold_2	CBPS_CBWC_CBWF_445_0_CBWC6096.b1		jgi|Coc_C169_1|38706|fgenesh1_pm.25_#_31	scaffold_25			OSTLU_45141	MICPUN_79438	MICPUCDRAFT_45227	VOLCADRAFT_91722
[KO:K03715]	2.4.1.46	1,2-diacylglycerol 3-beta-galactosyltransferase	CHLREDRAFT_113664						jgi|ChlNC64A_1|135334|IGS.gm_13_00262	scaffold_13	CBPS_CBWC_CBWF_0_0_CBWC4181.b1		jgi|Coc_C169_1|3454|gw1.2.286.1	scaffold_2			OSTLU_119506	MICPUN_107335	MICPUCDRAFT_45255	VOLCADRAFT_58564
[KO:K06118]	3.13.1.1	UDP-sulfoquinovose synthase	CHLREDRAFT_27658			contig-1303	a5607r372		jgi|ChlNC64A_1|49219|fgenesh3_pm.C_scaffold_28000019	scaffold_28	CBPS_CBWC_CBWF_2123_0_CBWF2418.g1		jgi|Coc_C169_1|54720|estExt_fgenesh1_pm.C_200002	scaffold_20	2036_1_CBOZ_CBPA	Ot10g03530	OSTLU_46754	MICPUN_97632	MICPUCDRAFT_24405	VOLCADRAFT_109932
[KO:K06119]	2.4.1.-	sulfoquinovosyltransferase	CHLREDRAFT_116277, 121326						jgi|ChlNC64A_1|8904|gw1.29.43.1	scaffold_29	CBPS_CBWC_CBWF_1430_1		jgi|Coc_C169_1|2441|gw1.16.75.1, |3992|gw1.16.127.1	scaffold_16		Ot15g01120	OSTLU_43238, 43286	MICPUN_58169	MICPUCDRAFT_56959	VOLCADRAFT_82536
[KO:K07407]	3.2.1.22	alpha-galactosidase	CHLREDRAFT_116873		H632_c1436p1	contig-1436	a2929r740		jgi|ChlNC64A_1|8942|gw1.18.102.1	scaffold_18			jgi|Coc_C169_1|4730|gw1.12.206.1	scaffold_5	3409_1_CBOZ_CBPA
[KO:K13506]	2.3.1.15	glycerol-3-phosphate O-acyltransferase 3/4	CHLREDRAFT_126704		H632_c615p1	contig-615	a46338r104			scaffold_12	CBPS_CBWC_CBWF_0_0_CBWF1916.g1		jgi|Coc_C169_1|4916|gw1.3.283.1	scaffold_3			OSTLU_51690	MICPUN_94289	MICPUCDRAFT_36845	VOLCADRAFT_78866
[KO:K14674]	3.1.1.3; 3.1.1.13; 3.1.1.4; 2.3.1.51	TAG lipase / steryl ester hydrolase / phospholipase A2 / LPA acyltransferase	CHLREDRAFT_183258		H632_c3616p0	contig-3616	a345383r13		jgi|ChlNC64A_1|50656|fgenesh3_pg.C_scaffold_4000155	scaffold_7	CBPS_CBWC_CBWF_964_1		jgi|Coc_C169_1|3379|gw1.23.53.1	scaffold_23		Ot06g03440, Ot17g02310	OSTLU_4077, 41292	MICPUN_75538	MICPUCDRAFT_3862	VOLCADRAFT_117294
[KO:K15728]	3.1.3.4	phosphatidate phosphatase LPIN	CHLREDRAFT_99951													Ot07g00640	OSTLU_19583	MICPUN_78669	MICPUCDRAFT_57652	VOLCADRAFT_32171
[KO:K15918]	2.7.1.31	D-glycerate 3-kinase	CHLREDRAFT_196366		H632_c3516p0	contig-3516	a25217r107		jgi|ChlNC64A_1|57258|estExt_fgenesh3_pg.C_50175	scaffold_5	CBPS_CBWC_CBWF_61_1		jgi|Coc_C169_1|37030|fgenesh1_pm.10_#_118	scaffold_10	1205_1_CBOZ_CBPA	Ot06g02040	OSTLU_41282	MICPUN_96229	MICPUCDRAFT_44766	VOLCADRAFT_94435
00562_Inositol_phosphate_metabolism
[KO:K00140]	1.2.1.18; 1.2.1.27	malonate-semialdehyde dehydrogenase (acetylating) / methylmalonate-semialdehyde dehydrogenase	CHLREDRAFT_130434		H632_c2218p0	contig-2218	a9793r275		jgi|ChlNC64A_1|51901|fgenesh3_pg.C_scaffold_8000188	scaffold_8	CBPS_CBWC_CBWF_0_0_CBWF5994.b1		jgi|Coc_C169_1|42781|fgenesh1_pg.10_#_284	scaffold_10	3538_2_CBOZ_CBPA					VOLCADRAFT_59269
[KO:K00469]	1.13.99.1	inositol oxygenase	CHLREDRAFT_116415								CBPS_CBWC_CBWF_1194_1		jgi|Coc_C169_1|8275|gw1.12.399.1	scaffold_12	4085_2_CBOZ_CBPA
[KO:K00888]	2.7.1.67	phosphatidylinositol 4-kinase	CHLREDRAFT_113185, 196944		H632_c3172p0, c312p0	contig-3172, 312	a31867r64, a4723r354		jgi|ChlNC64A_1|7243|gw1.12.58.1, |34246|estExt_Genewise1Plus.C_30665	scaffold_12, 3	CBPS_CBWC_CBWF_0_0_CBWF6204.g1		jgi|Coc_C169_1|1843|gw1.17.39.1, |4982|gw1.21.112.1	scaffold_17, 21	4705_0_CBOZ4504.b1_CBOZ_CBPA	Ot16g01500	OSTLU_40667	MICPUN_88613	MICPUCDRAFT_36377	VOLCADRAFT_57201
[KO:K00889]	2.7.1.68	1-phosphatidylinositol-4-phosphate 5-kinase	CHLREDRAFT_120269, 195580		H632_c4656p0, c42p0	contig-4656, 42	a113260r27, a3368r678		jgi|ChlNC64A_1|144032|IGS.gm_66_00002, |52972|fgenesh3_pg.C_scaffold_13000078	scaffold_66, 13	CBPS_CBWC_CBWF_0_0_CBWC6076.b1		jgi|Coc_C169_1|45593|fgenesh1_pg.26_#_43, |41115|fgenesh1_pg.5_#_318	scaffold_26, 5	4581_0_CBOZ2988.b1_CBOZ_CBPA	Ot07g03990	OSTLU_850		MICPUCDRAFT_16190	VOLCADRAFT_106487
[KO:K00913]	2.7.1.159; 2.7.1.134	inositol-1,3,4-trisphosphate 5/6-kinase / inositol-tetrakisphosphate 1-kinase	CHLREDRAFT_189763		H632_c8p4	contig-8	a10801r97		jgi|ChlNC64A_1|143754|IGS.gm_6_00328				jgi|Coc_C169_1|59032|Genemark1.994_g		0_0_CBOZ4078.g1_CBOZ_CBPA			MICPUN_84098		VOLCADRAFT_97715
[KO:K00914]	2.7.1.137	phosphatidylinositol 3-kinase	CHLREDRAFT_196943		H632_c2423p0	contig-2423	a29203r101		jgi|ChlNC64A_1|50453|fgenesh3_pg.C_scaffold_3000326	scaffold_128			jgi|Coc_C169_1|56836|Genemark1.5865_g	scaffold_12	4705_0_CBOZ4504.b1_CBOZ_CBPA	Ot03g01870	OSTLU_34142	MICPUN_88102	MICPUCDRAFT_42284	VOLCADRAFT_40672
[KO:K00999]	2.7.8.11	CDP-diacylglycerol--inositol 3-phosphatidyltransferase	CHLREDRAFT_186369		H632_c1731p0	contig-1731	a52595r45		jgi|ChlNC64A_1|20096|e_gw1.3.392.1	scaffold_3			jgi|Coc_C169_1|7465|gw1.25.72.1	scaffold_25		Ot20g00360	OSTLU_7533	MICPUN_80139	MICPUCDRAFT_11360	VOLCADRAFT_127375
[KO:K01092]	3.1.3.25	myo-inositol-1(or 4)-monophosphatase	CHLREDRAFT_186574, 196939		H632_c566p2	contig-566	a76423r76		jgi|ChlNC64A_1|34459|estExt_Genewise1Plus.C_40391	scaffold_4	CBPS_CBWC_CBWF_2380_1		jgi|Coc_C169_1|13932|e_gw1.4.485.1	scaffold_4	4856_1_CBOZ_CBPA		OSTLU_27588	MICPUN_59085	MICPUCDRAFT_60543
[KO:K01803]	5.3.1.1	triosephosphate isomerase (TIM)	CHLREDRAFT_26265		H632_c1491p1	contig-951	a115967r31		jgi|ChlNC64A_1|11092|gw1.15.138.1	scaffold_15	CBPS_CBWC_CBWF_2202_1		jgi|Coc_C169_1|10565|gw1.3.626.1	scaffold_3	3289_1_CBOZ_CBPA	Ot09g00080	OSTLU_24989, 36521, 43602	MICPUN_64258, 86041	MICPUCDRAFT_34435, 46562	VOLCADRAFT_109969
[KO:K01858]	5.5.1.4	myo-inositol-1-phosphate synthase	CHLREDRAFT_188120		H632_c980p0	contig-980	a4165r761		jgi|ChlNC64A_1|48482|fgenesh3_pm.C_scaffold_2000037	scaffold_2	CBPS_CBWC_CBWF_956_1		jgi|Coc_C169_1|2425|gw1.19.84.1	scaffold_19	1216_1_CBOZ_CBPA	Ot02g05460	OSTLU_36109	MICPUN_89687	MICPUCDRAFT_31973	VOLCADRAFT_103123
[KO:K05857]	3.1.4.11	phosphatidylinositol phospholipase C, delta	CHLREDRAFT_142126													Ot08g01240	OSTLU_50249	MICPUN_51586	MICPUCDRAFT_55672
[KO:K10047]	3.1.3.25; 3.1.3.-	inositol-phosphate phosphatase / L-galactose 1-phosphate phosphatase	CHLREDRAFT_120462		H632_c566p2	contig-566	a76423r76		jgi|ChlNC64A_1|11546|gw1.3.350.1	scaffold_3	CBPS_CBWC_CBWF_3186_1		jgi|Coc_C169_1|7195|gw1.6.308.1	scaffold_6	4856_1_CBOZ_CBPA	Ot05g04910	OSTLU_38679	MICPUN_79551	MICPUCDRAFT_15690	VOLCADRAFT_78931
[KO:K15422]	3.1.3.7; 3.1.3.57	3'(2'), 5'-bisphosphate nucleotidase / inositol polyphosphate 1-phosphatase	CHLREDRAFT_146533			contig-566			jgi|ChlNC64A_1|36008|estExt_Genewise1Plus.C_140053	scaffold_14	CBPS_CBWC_CBWF_3749_0_CBWF2009.b1		jgi|Coc_C169_1|37844|fgenesh1_pm.16_#_9	scaffold_16				MICPUN_88595		VOLCADRAFT_65837
00563_Glycosylphosphatidylinositol-anchor_biosynthesis
[KO:K03857]	2.4.1.198	phosphatidylinositol glycan, class A	CHLREDRAFT_139676		H632_c2281p0	contig-2281	a160641r19		jgi|ChlNC64A_1|20112|e_gw1.3.268.1	scaffold_3						Ot03g04730	OSTLU_49124	MICPUN_97051	MICPUCDRAFT_12476	VOLCADRAFT_94566
[KO:K03859]	---	phosphatidylinositol glycan, class C	CHLREDRAFT_141736		H632_c630p0				jgi|ChlNC64A_1|51638|fgenesh3_pg.C_scaffold_7000185								OSTLU_93333	MICPUN_75949		VOLCADRAFT_87448
[KO:K05283]	2.3.-.-	phosphatidylinositol glycan, class W	CHLREDRAFT_168820		H632_c1160p0	contig-1160	a210696r22		jgi|ChlNC64A_1|50098|fgenesh3_pg.C_scaffold_2000343	scaffold_2							OSTLU_15960	MICPUN_56354	MICPUCDRAFT_2596
[KO:K05284]	2.4.1.-	phosphatidylinositol glycan, class M	CHLREDRAFT_121145			contig-1490	a26114r73		jgi|ChlNC64A_1|9063|gw1.19.61.1	scaffold_19						Ot01g02860	OSTLU_40166	MICPUN_113420	MICPUCDRAFT_65000	VOLCADRAFT_31586
[KO:K05288]	---	phosphatidylinositol glycan, class O	CHLREDRAFT_186686		H632_c740p0	contig-740	a14475r149		jgi|ChlNC64A_1|134879|IGS.gm_12_00265	scaffold_12						Ot15g02560	OSTLU_51391	MICPUN_113927	MICPUCDRAFT_55650
[KO:K05290]	2.6.-.-	phosphatidylinositol glycan, class K	CHLREDRAFT_150416		H632_c2856p0	contig-548	a121132r36		jgi|ChlNC64A_1|9494|gw1.5.182.1	scaffold_5	CBPS_CBWC_CBWF_4080_0_CBWF8196.b1		jgi|Coc_C169_1|3372|gw1.1.290.1		3519_1_CBOZ_CBPA	Ot15g00540	OSTLU_5025	MICPUN_59623	MICPUCDRAFT_57797	VOLCADRAFT_60020
[KO:K05292]	---	phosphatidylinositol glycan, class T	CHLREDRAFT_188365						jgi|ChlNC64A_1|142327|IGS.gm_4_00468	scaffold_4	CBPS_CBWC_CBWF_3519_0_CBWC5467.g1						OSTLU_31718	MICPUN_58571	MICPUCDRAFT_56539	VOLCADRAFT_102993
[KO:K05293]	---	phosphatidylinositol glycan, class U	CHLREDRAFT_184581													Ot04g03900	OSTLU_31299	MICPUN_60372	MICPUCDRAFT_59084	VOLCADRAFT_87261
[KO:K07542]	2.4.1.-	phosphatidylinositol glycan, class V	CHLREDRAFT_142782		H632_c2154p0											Ot02g05590	OSTLU_92291	MICPUN_98290	MICPUCDRAFT_42346
00564_Glycerophospholipid_metabolism
[KO:K00006]	1.1.1.8	glycerol-3-phosphate dehydrogenase (NAD+)	CHLREDRAFT_96789		H632_c747p0	contig-747	a177294r21		jgi|ChlNC64A_1|52353|fgenesh3_pg.C_scaffold_10000138	scaffold_10			jgi|Coc_C169_1|349|gw1.10.8.1	scaffold_10						VOLCADRAFT_57957
[KO:K00111]	1.1.5.3	glycerol-3-phosphate dehydrogenase	CHLREDRAFT_187997		H632_c384p0	contig-384	a18307r212		jgi|ChlNC64A_1|6900|gw1.15.15.1	scaffold_15	CBPS_CBWC_CBWF_638_1		jgi|Coc_C169_1|1652|gw1.3.93.1	scaffold_3	2078_1_CBOZ_CBPA	Ot03g01530	OSTLU_30486	MICPUN_82879		VOLCADRAFT_80593
[KO:K00630]	2.3.1.15	glycerol-3-phosphate O-acyltransferase	CHLREDRAFT_205741		H632_c100p1	contig-100	a11344r153		jgi|ChlNC64A_1|143437|IGS.gm_6_00011				jgi|Coc_C169_1|49064|estExt_fgenesh1_pg.C_210003	scaffold_21	2987_0_CBOZ3946.b1_CBOZ_CBPA	Ot02g00450	OSTLU_119500	MICPUN_106290	MICPUCDRAFT_27830	VOLCADRAFT_81121
[KO:K00655]	2.3.1.51	1-acyl-sn-glycerol-3-phosphate acyltransferase	CHLREDRAFT_174358		H632_c481p1	contig-481	a119434r25		jgi|ChlNC64A_1|10507|gw1.26.150.1	scaffold_26	CBPS_CBWC_CBWF_298_1		jgi|Coc_C169_1|40016|fgenesh1_pg.3_#_77	scaffold_3		Ot07g03180	OSTLU_32744	MICPUN_78992	MICPUCDRAFT_4985	VOLCADRAFT_105609
[KO:K00894]	2.7.1.82	ethanolamine kinase	CHLREDRAFT_118793		H632_c502p1	contig-502	a21791r98		jgi|ChlNC64A_1|27635|e_gw1.26.125.1	scaffold_26	CBPS_CBWC_CBWF_3908_0_CBWF5439.g1		jgi|Coc_C169_1|6533|gw1.14.221.1	scaffold_14	4212_1_CBOZ_CBPA			MICPUN_58163	MICPUCDRAFT_67101	VOLCADRAFT_43837
[KO:K00967]	2.7.7.14	ethanolamine-phosphate cytidylyltransferase	CHLREDRAFT_136865		H632_c175p1	contig-175	a16845r107		jgi|ChlNC64A_1|136026|IGS.gm_15_00122	scaffold_15	CBPS_CBWC_CBWF_1947_1		jgi|Coc_C169_1|47249|estExt_fgenesh1_pg.C_70004	scaffold_7	1556_1_CBOZ_CBPA	Ot09g02440	OSTLU_33520	MICPUN_97416	MICPUCDRAFT_17727	VOLCADRAFT_109104
[KO:K00981]	2.7.7.41	phosphatidate cytidylyltransferase	CHLREDRAFT_128536, 188754		H632_c154p0, c107p2	contig-154, 107	a27261r125, a29151r139		jgi|ChlNC64A_1|143470|IGS.gm_6_00044, |16917|gw1.4.573.1	scaffold_6, 4	CBPS_CBWC_CBWF_138_1		jgi|Coc_C169_1|3429|gw1.7.177.1, |35823|fgenesh1_pm.4_#_225	scaffold_7, 4	5104_0_, 4493_0_CBOZ8356.b1_CBOZ_CBPA	Ot04g03680, Ot07g00810	OSTLU_32481, 37424	MICPUN_57473	MICPUCDRAFT_49712	VOLCADRAFT_43405, 56233
[KO:K00995]	2.7.8.5	CDP-diacylglycerol--glycerol-3-phosphate 3-phosphatidyltransferase	CHLREDRAFT_194257		H632_c1879p0	contig-1730	a42628r145		jgi|ChlNC64A_1|144596|IGS.gm_7_00538		CBPS_CBWC_CBWF_2100_1		jgi|Coc_C169_1|44431|fgenesh1_pg.18_#_33	scaffold_18	3869_0_CBOZ7386.b1_CBOZ_CBPA		OSTLU_39077	MICPUN_113358	MICPUCDRAFT_5931	VOLCADRAFT_44897
[KO:K00999]	2.7.8.11	CDP-diacylglycerol--inositol 3-phosphatidyltransferase	CHLREDRAFT_186369		H632_c1731p0	contig-1731	a52595r45		jgi|ChlNC64A_1|20096|e_gw1.3.392.1	scaffold_3			jgi|Coc_C169_1|7465|gw1.25.72.1	scaffold_25		Ot20g00360	OSTLU_7533	MICPUN_80139	MICPUCDRAFT_11360	VOLCADRAFT_127375
[KO:K01126]	3.1.4.46	glycerophosphoryl diester phosphodiesterase	CHLREDRAFT_100701, 115518, 123120										jgi|Coc_C169_1|65010|estExt_Genemark1.C_30493, |61140|Genemark1.1951_g		421_1_CBOZ_CBPA					VOLCADRAFT_33032
[KO:K01613]	4.1.1.65	phosphatidylserine decarboxylase	CHLREDRAFT_179976		H632_c5628p0	contig-5628	a29769r76						jgi|Coc_C169_1|45516|fgenesh1_pg.25_#_53							VOLCADRAFT_62226
[KO:K08744]	2.7.8.-	cardiolipin synthase	CHLREDRAFT_177689		H632_c1879p0	contig-130	a54183r46		jgi|ChlNC64A_1|143934|IGS.gm_6_00508	scaffold_6	CBPS_CBWC_CBWF_2100_1		jgi|Coc_C169_1|41769|fgenesh1_pg.7_#_173	scaffold_7	3869_0_CBOZ7386.b1_CBOZ_CBPA	Ot14g01640		MICPUN_63526	MICPUCDRAFT_59341
[KO:K13506]	2.3.1.15	glycerol-3-phosphate O-acyltransferase 3/4	CHLREDRAFT_126704		H632_c615p1	contig-615	a46338r104			scaffold_12	CBPS_CBWC_CBWF_0_0_CBWF1916.g1		jgi|Coc_C169_1|4916|gw1.3.283.1	scaffold_3			OSTLU_51690	MICPUN_94289	MICPUCDRAFT_36845	VOLCADRAFT_78866
[KO:K13510]	2.3.1.23; 2.3.1.67	lysophosphatidylcholine acyltransferase / lyso-PAF acetyltransferase	CHLREDRAFT_189038		H632_c147p2	contig-147	a36019r105		jgi|ChlNC64A_1|135018|IGS.gm_12_00404	scaffold_12	CBPS_CBWC_CBWF_0_0_CBWF3505.g1		jgi|Coc_C169_1|5505|gw1.26.41.1	scaffold_26	4256_1_CBOZ_CBPA				MICPUCDRAFT_53037	VOLCADRAFT_73089, 91941
[KO:K13511]	2.3.1.-	monolysocardiolipin acyltransferase	CHLREDRAFT_152627, 154343		H632_c1448p0	contig-1448	a51445r80		jgi|ChlNC64A_1|145215|IGS.gm_9_00022, |135912|IGS.gm_15_00008	scaffold_9, 15	CBPS_CBWC_CBWF_3016_1, _3722_0_CBWF1154.b1		jgi|Coc_C169_1|55474|Genemark1.418_g, |62979|Genemark1.3762_g	scaffold_1, 7		Ot13g02490	OSTLU_7284, 7370	MICPUN_59510	MICPUCDRAFT_11236	VOLCADRAFT_103147
[KO:K13621]	---	betaine lipid synthase	CHLREDRAFT_77062						jgi|ChlNC64A_1|27416|e_gw1.25.10.1	scaffold_25			jgi|Coc_C169_1|14450|e_gw1.5.94.1	scaffold_5	78_2_CBOZ_CBPA					VOLCADRAFT_83033
[KO:K14674]	3.1.1.3; 3.1.1.13; 3.1.1.4; 2.3.1.51	TAG lipase / steryl ester hydrolase / phospholipase A2 / LPA acyltransferase	CHLREDRAFT_183258		H632_c3616p0	contig-3616	a345383r13		jgi|ChlNC64A_1|50656|fgenesh3_pg.C_scaffold_4000155	scaffold_7	CBPS_CBWC_CBWF_964_1		jgi|Coc_C169_1|3379|gw1.23.53.1	scaffold_23		Ot06g03440, Ot17g02310	OSTLU_4077, 41292	MICPUN_75538	MICPUCDRAFT_3862	VOLCADRAFT_117294
[KO:K14676]	3.1.1.5	lysophospholipid hydrolase	CHLREDRAFT_167286										jgi|Coc_C169_1|150|gw1.21.3.1	scaffold_21			OSTLU_30628	MICPUN_57554	MICPUCDRAFT_52035
[KO:K15728]	3.1.3.4	phosphatidate phosphatase LPIN	CHLREDRAFT_99951													Ot07g00640	OSTLU_19583	MICPUN_78669	MICPUCDRAFT_57652	VOLCADRAFT_32171
00565_Ether_lipid_metabolism
[KO:K01062]	3.1.1.47	platelet-activating factor acetylhydrolase	CHLREDRAFT_144554, 94202		H632_c451p0	contig-451	a22033r55, a39410r138		jgi|ChlNC64A_1|144494|IGS.gm_7_00436, |51658|fgenesh3_pg.C_scaffold_7000205		CBPS_CBWC_CBWF_2044_1		jgi|Coc_C169_1|60734|Genemark1.1545_g	scaffold_3			OSTLU_18539		MICPUCDRAFT_21883	VOLCADRAFT_120568
[KO:K13510]	2.3.1.23; 2.3.1.67	lysophosphatidylcholine acyltransferase / lyso-PAF acetyltransferase	CHLREDRAFT_189038		H632_c147p2	contig-147	a36019r105		jgi|ChlNC64A_1|135018|IGS.gm_12_00404	scaffold_12	CBPS_CBWC_CBWF_0_0_CBWF3505.g1		jgi|Coc_C169_1|5505|gw1.26.41.1	scaffold_26	4256_1_CBOZ_CBPA				MICPUCDRAFT_53037	VOLCADRAFT_73089, 91941
[KO:K14674]	3.1.1.3; 3.1.1.13; 3.1.1.4; 2.3.1.51	TAG lipase / steryl ester hydrolase / phospholipase A2 / LPA acyltransferase	CHLREDRAFT_183258		H632_c3616p0	contig-3616	a345383r13		jgi|ChlNC64A_1|50656|fgenesh3_pg.C_scaffold_4000155	scaffold_7	CBPS_CBWC_CBWF_964_1		jgi|Coc_C169_1|3379|gw1.23.53.1	scaffold_23		Ot06g03440, Ot17g02310	OSTLU_4077, 41292	MICPUN_75538	MICPUCDRAFT_3862	VOLCADRAFT_117294
00590_Arachidonic_acid_metabolism
[KO:K00079]	1.1.1.184; 1.1.1.189; 1.1.1.197	carbonyl reductase 1	CHLREDRAFT_159999		H632_c2955p1	contig-2450	a1361r1701		jgi|ChlNC64A_1|142357|IGS.gm_4_00498	scaffold_202	CBPS_CBWC_CBWF_2098_1		jgi|Coc_C169_1|39361|fgenesh1_pg.1_#_554	scaffold_1	1088_1_CBOZ_CBPA
[KO:K00432]	1.11.1.9	glutathione peroxidase	CHLREDRAFT_137012, 143122		H632_c1148p0	contig-1148	a1845r574		jgi|ChlNC64A_1|48312|fgenesh3_kg.C_scaffold_24000002	scaffold_24	CBPS_CBWC_CBWF_1055_1		jgi|Coc_C169_1|18129|e_gw1.14.261.1, |8207|gw1.14.261.1	scaffold_14	2679_1_CBOZ_CBPA	Ot08g00440, Ot08g03350	OSTLU_12779	MICPUN_112672, 112674, 112675	MICPUCDRAFT_70206, 70209	VOLCADRAFT_109762, 79644
[KO:K01254]	3.3.2.6	leukotriene-A4 hydrolase	CHLREDRAFT_113845		H632_c21p0	contig-21	a16094r159		jgi|ChlNC64A_1|7101|gw1.8.26.1	scaffold_7	CBPS_CBWC_CBWF_597_0_CBWC7666.g1		jgi|Coc_C169_1|40855|fgenesh1_pg.5_#_58					MICPUN_96766		VOLCADRAFT_104039
[KO:K01832]	5.3.99.5	thromboxane-A synthase	CHLREDRAFT_196715		H632_c145p0	contig-145	a23231r202		jgi|ChlNC64A_1|142738|IGS.gm_5_00067	scaffold_4	CBPS_CBWC_CBWF_1502_1		jgi|Coc_C169_1|59196|Genemark1.1158_g	scaffold_2	3046_1_CBOZ_CBPA
[KO:K05309]	5.3.99.3	microsomal prostaglandin-E synthase 2	CHLREDRAFT_142756		H632_c382p1	contig-382	a69573r65		jgi|ChlNC64A_1|139602|IGS.gm_25_00153	scaffold_25			jgi|Coc_C169_1|14039|e_gw1.5.440.1	scaffold_5		Ot02g05510	OSTLU_29981	MICPUN_88190	MICPUCDRAFT_5265	VOLCADRAFT_82699
[KO:K14674]	3.1.1.3; 3.1.1.13; 3.1.1.4; 2.3.1.51	TAG lipase / steryl ester hydrolase / phospholipase A2 / LPA acyltransferase	CHLREDRAFT_183258		H632_c3616p0	contig-3616	a345383r13		jgi|ChlNC64A_1|50656|fgenesh3_pg.C_scaffold_4000155	scaffold_7	CBPS_CBWC_CBWF_964_1		jgi|Coc_C169_1|3379|gw1.23.53.1	scaffold_23		Ot06g03440, Ot17g02310	OSTLU_4077, 41292	MICPUN_75538	MICPUCDRAFT_3862	VOLCADRAFT_117294
00591_Linoleic_acid_metabolism
[KO:K14674]	3.1.1.3; 3.1.1.13; 3.1.1.4; 2.3.1.51	TAG lipase / steryl ester hydrolase / phospholipase A2 / LPA acyltransferase	CHLREDRAFT_183258		H632_c3616p0	contig-3616	a345383r13		jgi|ChlNC64A_1|50656|fgenesh3_pg.C_scaffold_4000155	scaffold_7	CBPS_CBWC_CBWF_964_1		jgi|Coc_C169_1|3379|gw1.23.53.1	scaffold_23		Ot06g03440, Ot17g02310	OSTLU_4077, 41292	MICPUN_75538	MICPUCDRAFT_3862	VOLCADRAFT_117294
[KO:K15718]	1.13.11.58	linoleate 9S-lipoxygenase	CHLREDRAFT_144677						jgi|ChlNC64A_1|56520|estExt_fgenesh3_pg.C_10194	scaffold_1	CBPS_CBWC_CBWF_686_1		jgi|Coc_C169_1|26186|estExt_Genewise1.C_220026	scaffold_19	4882_0_CBOZ6106.b1_CBOZ_CBPA					VOLCADRAFT_97558
00592_alpha_Linolenic_acid_metabolism
[KO:K00232]	1.3.3.6	acyl-CoA oxidase	CHLREDRAFT_121379, 122887, 170822, 40101		H632_c2497p0, c413p1, c2049p0	contig-2497, 5310, 2049	a6109r321, a6917r266		jgi|ChlNC64A_1|36152|estExt_Genewise1Plus.C_140395, |135478|IGS.gm_14_00011, |55215|fgenesh3_pg.C_scaffold_32000007, |25082|e_gw1.14.418.1	scaffold_14, 32	CBPS_CBWC_CBWF_1652_1, _2184_1, _3625_0_CBWC7047.b1, _3984_0_CBWF6724.b1		jgi|Coc_C169_1|35254|fgenesh1_pm.2_#_264, |37427|fgenesh1_pm.12_#_170, |14462|e_gw1.5.248.1, |54082|estExt_fgenesh1_pm.C_130004	scaffold_2, 12, 5, 13	3247_1_CBOZ_CBPA, 3517_0_CBOZ6919.b1_4875_0_CBOZ6060.b1_CBOZ_CBPA	Ot01g02610	OSTLU_13743	MICPUN_80126	MICPUCDRAFT_31340	VOLCADRAFT_104659, 58804, 92640, 93927, 93964
[KO:K05894]	1.3.1.42	12-oxophytodienoic acid reductase	CHLREDRAFT_121264, 132041		H632_c528p1	contig-528	a11649r307		jgi|ChlNC64A_1|52565|fgenesh3_pg.C_scaffold_11000141	scaffold_11			jgi|Coc_C169_1|3884|gw1.14.143.1, |18067|e_gw1.14.141.1	scaffold_13	2006_2_CBOZ_CBPA					VOLCADRAFT_81300
[KO:K07513]	2.3.1.16	acetyl-CoA acyltransferase 1	CHLREDRAFT_138637		H632_c1964p1	contig-1964	a4945r347		jgi|ChlNC64A_1|16660|gw1.6.359.1	scaffold_6	CBPS_CBWC_CBWF_2185_2		jgi|Coc_C169_1|56826|Genemark1.5855_g	scaffold_12	149_1_CBOZ_CBPA		OSTLU_40909	MICPUN_105088	MICPUCDRAFT_44754	VOLCADRAFT_102696
[KO:K10527]	4.2.1.17; 1.1.1.35; 1.1.1.211	enoyl-CoA hydratase/3-hydroxyacyl-CoA dehydrogenase	CHLREDRAFT_132158		H632_c571p0	contig-571	a13565r165		jgi|ChlNC64A_1|48307|fgenesh3_kg.C_scaffold_23000004	scaffold_23	CBPS_CBWC_CBWF_374_1		jgi|Coc_C169_1|38472|fgenesh1_pm.21_#_53	scaffold_21	0_0_CBOZ3767.b1_CBOZ_CBPA		OSTLU_49128	MICPUN_94758	MICPUCDRAFT_45151	VOLCADRAFT_74021
[KO:K14674]	3.1.1.3; 3.1.1.13; 3.1.1.4; 2.3.1.51	TAG lipase / steryl ester hydrolase / phospholipase A2 / LPA acyltransferase	CHLREDRAFT_183258		H632_c3616p0	contig-3616	a345383r13		jgi|ChlNC64A_1|50656|fgenesh3_pg.C_scaffold_4000155	scaffold_7	CBPS_CBWC_CBWF_964_1		jgi|Coc_C169_1|3379|gw1.23.53.1	scaffold_23		Ot06g03440, Ot17g02310	OSTLU_4077, 41292	MICPUN_75538	MICPUCDRAFT_3862	VOLCADRAFT_117294
00600_Sphingolipid_metabolism
[KO:K00654]	2.3.1.50	serine palmitoyltransferase	CHLREDRAFT_115899, 119291		H632_c270p2, c4260p0	contig-270, 4260	a5901r180		jgi|ChlNC64A_1|22608|e_gw1.8.69.1, |7926|gw1.21.52.1	scaffold_8, 21	CBPS_CBWC_CBWF_0_0_CBWC7447.b1		jgi|Coc_C169_1|3220|gw1.10.155.1, |17160|e_gw1.11.352.1	scaffold_10, 11	3084_2_CBOZ_CBPA		OSTLU_40144, 40179			VOLCADRAFT_82885
[KO:K01190]	3.2.1.23	beta-galactosidase	CHLREDRAFT_118013						jgi|ChlNC64A_1|140909|IGS.gm_3_00648	scaffold_3			jgi|Coc_C169_1|480|gw1.21.14.1	scaffold_21		Ot07g03490	OSTLU_119488	MICPUN_51444	MICPUCDRAFT_70834	VOLCADRAFT_118236
[KO:K01634]	4.1.2.27	sphinganine-1-phosphate aldolase	CHLREDRAFT_175809		H632_c365p1	contig-365	a65616r77		jgi|ChlNC64A_1|144988|IGS.gm_8_00316	scaffold_8	CBPS_CBWC_CBWF_271_2		jgi|Coc_C169_1|11769|e_gw1.2.199.1	scaffold_2	0_0_CBOZ7177.b1_CBOZ_CBPA	Ot02g04260	OSTLU_119543	MICPUN_54933	MICPUCDRAFT_70682	VOLCADRAFT_60125
[KO:K04708]	1.1.1.102	3-dehydrosphinganine reductase	CHLREDRAFT_55666		H632_c1376p0	contig-1559	a28637r82		jgi|ChlNC64A_1|57682|estExt_fgenesh3_pg.C_80239	scaffold_8	CBPS_CBWC_CBWF_3807_0_CBWF3086.b1		jgi|Coc_C169_1|43899|fgenesh1_pg.15_#_80	scaffold_10	1779_1_CBOZ_CBPA					VOLCADRAFT_90131
[KO:K04710]	2.3.1.24	ceramide synthetase	CHLREDRAFT_105088		H632_c29p3	contig-1994	a81458r60		jgi|ChlNC64A_1|50975|fgenesh3_pg.C_scaffold_5000142	scaffold_5			jgi|Coc_C169_1|48126|estExt_fgenesh1_pg.C_120130	scaffold_15	3493_1_CBOZ_CBPA			MICPUN_107343	MICPUCDRAFT_49432	VOLCADRAFT_55921
[KO:K04713]	1.14.13.169	sphinganine C4-monooxygenase	CHLREDRAFT_186886																	VOLCADRAFT_57952
[KO:K04718]	2.7.1.91	sphingosine kinase	CHLREDRAFT_147241		H632_c760p0	contig-760	a15392r155		jgi|ChlNC64A_1|134482|IGS.gm_11_00328	scaffold_11			jgi|Coc_C169_1|63517|Genemark1.4300_g	scaffold_8	2254_1_CBOZ_CBPA		OSTLU_17414	MICPUN_87107	MICPUCDRAFT_20585	VOLCADRAFT_87791
[KO:K07407]	3.2.1.22	alpha-galactosidase	CHLREDRAFT_116873		H632_c1436p1	contig-1436	a2929r740		jgi|ChlNC64A_1|8942|gw1.18.102.1	scaffold_18			jgi|Coc_C169_1|4730|gw1.12.206.1	scaffold_5	3409_1_CBOZ_CBPA
[KO:K12349]	3.5.1.23	neutral ceramidase	CHLREDRAFT_120172		H632_c11p0	contig-1154	a11753r406		jgi|ChlNC64A_1|139234|IGS.gm_24_00014	scaffold_24			jgi|Coc_C169_1|37600|fgenesh1_pm.14_#_34	scaffold_14	4113_1_CBOZ_CBPA			MICPUN_58114		VOLCADRAFT_63318
[KO:K12351]	3.1.4.12	sphingomyelin phosphodiesterase 2	CHLREDRAFT_168092						jgi|ChlNC64A_1|133272|IGS.gm_1_00408	scaffold_1			jgi|Coc_C169_1|45348|fgenesh1_pg.23_#_102							VOLCADRAFT_106613
00604_Glycosphingolipid_biosynthesis
[KO:K03372]	2.3.1.-	MFS transporter, PAT family, solute carrier family 33 (acetyl-CoA transportor), member 1	CHLREDRAFT_145923		H632_c1564p0	contig-1564	a3443r235		jgi|ChlNC64A_1|53753|fgenesh3_pg.C_scaffold_17000086	scaffold_17			jgi|Coc_C169_1|45231|fgenesh1_pg.22_#_116	scaffold_22			OSTLU_13668	MICPUN_93259
00620_Pyruvate_metabolism
[KO:K00025]	1.1.1.37	malate dehydrogenase	CHLREDRAFT_158129		H632_c1713p1	contig-1713	a1740r1589		jgi|ChlNC64A_1|36737|estExt_Genewise1Plus.C_210009	scaffold_1	CBPS_CBWC_CBWF_1762_1		jgi|Coc_C169_1|42884|fgenesh1_pg.11_#_92	scaffold_4	1790_1_CBOZ_CBPA	Ot06g00180	OSTLU_87414	MICPUN_99233	MICPUCDRAFT_49609	VOLCADRAFT_109769
[KO:K00026]	1.1.1.37	malate dehydrogenase	CHLREDRAFT_126023, 137163, 60444		H632_c1281p0	contig-1281	a17151r67, a44657r66, a6113r424		jgi|ChlNC64A_1|20080|e_gw1.3.256.1, |55945|estExt_fgenesh3_pm.C_10044, |48356|fgenesh3_kg.C_scaffold_29000007	scaffold_29, 3	CBPS_CBWC_CBWF_1446_1, _1129_1		jgi|Coc_C169_1|37816|fgenesh1_pm.15_#_92, |62531|Genemark1.3314_g, |5287|gw1.4.481.1	scaffold_15, 6, 4	3145_1_, 2114_1_CBOZ_CBPA	Ot03g00170, Ot06g02460	OSTLU_12282, 24671, 32875	MICPUN_94075, 96518, 97181	MICPUCDRAFT_37587, 63993	VOLCADRAFT_75816, 77493, 82979
[KO:K00028]	1.1.1.39	malate dehydrogenase (decarboxylating)	CHLREDRAFT_196833		H632_c101p1	contig-101	a31746r151		jgi|ChlNC64A_1|136414|IGS.gm_16_00137	scaffold_10	CBPS_CBWC_CBWF_3287_0_CBWC1910.b1		jgi|Coc_C169_1|52481|estExt_fgenesh1_pm.C_20269	scaffold_2	2430_1_CBOZ_CBPA	Ot12g02700	OSTLU_26919	MICPUN_55180
[KO:K00029]	1.1.1.40	malate dehydrogenase (oxaloacetate-decarboxylating)(NADP+)	CHLREDRAFT_126820, 147722, 196351, 196831, 196832		H632_c101p1	contig-2198	a44653r76, a60782r54		jgi|ChlNC64A_1|7239|gw1.3.59.1, |136414|IGS.gm_16_00137	scaffold_3, 10	CBPS_CBWC_CBWF_727_2		jgi|Coc_C169_1|62489|Genemark1.3272_g, |52449|estExt_fgenesh1_pm.C_20225, |34895|fgenesh1_pm.1_#_236, |54433|estExt_fgenesh1_pm.C_160075	scaffold_6, 2, 1, 16	3848_1_CBOZ_CBPA	Ot01g00040, Ot04g03750, Ot06g03980, Ot07g00930	OSTLU_12474, 41212	MICPUN_62430, 81102, 97726	MICPUCDRAFT_1435, 21535, 45850	VOLCADRAFT_77886, 78607
[KO:K00051]	1.1.1.82	malate dehydrogenase (NADP+)	CHLREDRAFT_192083		H632_c1713p1	contig-1713	a1740r1589		jgi|ChlNC64A_1|49623|fgenesh3_pg.C_scaffold_1000321	scaffold_1	CBPS_CBWC_CBWF_1424_1		jgi|Coc_C169_1|36224|fgenesh1_pm.6_#_72	scaffold_6	1790_1_CBOZ_CBPA	Ot08g00890	OSTLU_42336	MICPUN_104869	MICPUCDRAFT_57848	VOLCADRAFT_76573
[KO:K00128]	1.2.1.3	aldehyde dehydrogenase (NAD+)	CHLREDRAFT_135609		H632_c1464p0	contig-1464	a16775r225		jgi|ChlNC64A_1|7731|gw1.1.111.1	scaffold_1	CBPS_CBWC_CBWF_498_1		jgi|Coc_C169_1|2147|gw1.23.34.1	scaffold_23	1093_1_CBOZ_CBPA	Ot01g04160	OSTLU_13873	MICPUN_113300	MICPUCDRAFT_55745	VOLCADRAFT_73567
[KO:K00161]	1.2.4.1	pyruvate dehydrogenase E1 component subunit alpha	CHLREDRAFT_193810		H632_c18p0	contig-18	a15629r260		jgi|ChlNC64A_1|56254|estExt_fgenesh3_pm.C_160009	scaffold_16	CBPS_CBWC_CBWF_2495_1		jgi|Coc_C169_1|3960|gw1.2.330.1	scaffold_2	1636_1_CBOZ_CBPA	Ot01g05450	OSTLU_29179	MICPUN_89160	MICPUCDRAFT_22101, 23282	VOLCADRAFT_104783, 68179
[KO:K00162]	1.2.4.1	pyruvate dehydrogenase E1 component subunit beta	CHLREDRAFT_139515, 190446		H632_c47p1, c1092p0	contig-47, 1092	a5471r660, a3135r359		jgi|ChlNC64A_1|48963|fgenesh3_pm.C_scaffold_14000037, |134298|IGS.gm_11_00144	scaffold_14, 11	CBPS_CBWC_CBWF_265_1		jgi|Coc_C169_1|35266|fgenesh1_pm.2_#_276, |15625|e_gw1.8.238.1	scaffold_2, 8	3095_1_, 2734_1_CBOZ_CBPA	Ot06g02870	OSTLU_12625	MICPUN_86033	MICPUCDRAFT_58821	VOLCADRAFT_108817, 77470
[KO:K00382]	1.8.1.4	dihydrolipoamide dehydrogenase	CHLREDRAFT_205763, 57890		H632_c2312p0, c1169p1	contig-2312, 1169	a41914r109, a11039r490		jgi|ChlNC64A_1|36173|estExt_Genewise1Plus.C_140425, |48339|fgenesh3_kg.C_scaffold_26000016	scaffold_14, 26	CBPS_CBWC_CBWF_887_1, _548_1		jgi|Coc_C169_1|38031|fgenesh1_pm.17_#_60	scaffold_17	2338_1_CBOZ_CBPA	Ot04g05070, Ot11g03020	OSTLU_15203, 26614	MICPUN_104967, 104984	MICPUCDRAFT_28757, 34732	VOLCADRAFT_83716, 95813
[KO:K00626]	2.3.1.9	acetyl-CoA C-acetyltransferase	CHLREDRAFT_118204		H632_c3387p0	contig-3387	a991r574		jgi|ChlNC64A_1|56332|estExt_fgenesh3_pm.C_240017	scaffold_24	CBPS_CBWC_CBWF_2185_1		jgi|Coc_C169_1|4417|gw1.11.146.1	scaffold_11	149_1_CBOZ_CBPA					VOLCADRAFT_75176, 84837
[KO:K00627]	2.3.1.12	pyruvate dehydrogenase E2 component (dihydrolipoamide acetyltransferase)	CHLREDRAFT_149709, 187285, 196500		H632_c1184p0, c3068p1	contig-1184, 3068	a14722r150, a19267r118		jgi|ChlNC64A_1|137866|IGS.gm_2_00333, |49558|fgenesh3_pg.C_scaffold_1000256, |19416|e_gw1.2.83.1	scaffold_2, 1	CBPS_CBWC_CBWF_3122_1		jgi|Coc_C169_1|1519|gw1.2.123.1, |62654|Genemark1.3437_g, |3931|gw1.18.109.1	scaffold_2, 6, 18	2566_1_, 2042_1_CBOZ_CBPA	Ot03g01020, Ot05g03030	OSTLU_2905, 31760	MICPUN_68004, 96637	MICPUCDRAFT_25687, 42270	VOLCADRAFT_79498, 80947
[KO:K00873]	2.7.1.40	pyruvate kinase	CHLREDRAFT_118203, 136854, 196263		H632_c144p1, c1108p1	contig-144, 1108	a3345r247		jgi|ChlNC64A_1|34881|estExt_Genewise1Plus.C_60179, |16416|gw1.4.521.1	scaffold_18, 10	CBPS_CBWC_CBWF_348_2, _1822_2		jgi|Coc_C169_1|36469|fgenesh1_pm.7_#_85, |37635|fgenesh1_pm.14_#_69	scaffold_7, 14	3013_1_CBOZ_CBPA	Ot16g00440, Ot16g00530	OSTLU_27708, 40662	MICPUN_100158, 104841, 112645, 56945, 82586, 93072	MICPUCDRAFT_16253, 19660, 48021, 49534, 49922, 64256	VOLCADRAFT_68572, 82954, 84504
[KO:K01006]	2.7.9.1	pyruvate,orthophosphate dikinase	CHLREDRAFT_133570, 196616						jgi|ChlNC64A_1|28160|e_gw1.32.5.1	scaffold_32	CBPS_CBWC_CBWF_1366_1		jgi|Coc_C169_1|34895|fgenesh1_pm.1_#_236	scaffold_2	3848_1_CBOZ_CBPA	Ot02g06800	OSTLU_29856	MICPUN_104991	MICPUCDRAFT_27547	VOLCADRAFT_66258, 74670
[KO:K01069]	3.1.2.6	hydroxyacylglutathione hydrolase	CHLREDRAFT_133171		H632_c330p0	contig-330	a63057r52		jgi|ChlNC64A_1|56279|estExt_fgenesh3_pm.C_180021	scaffold_18	CBPS_CBWC_CBWF_22_1		jgi|Coc_C169_1|54042|estExt_fgenesh1_pm.C_120118	scaffold_12	4836_0_CBOZ5699.b1_CBOZ_CBPA	Ot06g02990	OSTLU_6889, 6929	MICPUN_96426	MICPUCDRAFT_60677	VOLCADRAFT_74188
[KO:K01512]	3.6.1.7	acylphosphatase	CHLREDRAFT_157820			contig-2733	a24678r79		jgi|ChlNC64A_1|22175|e_gw1.7.258.1	scaffold_7			jgi|Coc_C169_1|58228|Genemark1.7257_g	scaffold_17						VOLCADRAFT_66220
[KO:K01595]	4.1.1.31	phosphoenolpyruvate carboxylase	CHLREDRAFT_80312		H632_c413p0	contig-413	a28803r94		jgi|ChlNC64A_1|56337|estExt_fgenesh3_pm.C_240023	scaffold_24	CBPS_CBWC_CBWF_128_2		jgi|Coc_C169_1|52173|estExt_fgenesh1_pm.C_10166	scaffold_1		Ot12g02990	OSTLU_51006	MICPUN_104763	MICPUCDRAFT_31189	VOLCADRAFT_56464, 59445
[KO:K01610]	4.1.1.49	phosphoenolpyruvate carboxykinase (ATP)	CHLREDRAFT_196612		H632_c2237p0	contig-2237	a7407r669		jgi|ChlNC64A_1|49535|fgenesh3_pg.C_scaffold_1000233	scaffold_25	CBPS_CBWC_CBWF_1777_1		jgi|Coc_C169_1|36074|fgenesh1_pm.5_#_173	scaffold_5	797_1_CBOZ_CBPA					VOLCADRAFT_106350, 81482
[KO:K01638]	2.3.3.9	malate synthase	CHLREDRAFT_196328		H632_c1474p0	contig-1474	a8571r199		jgi|ChlNC64A_1|18745|e_gw1.1.83.1	scaffold_1	CBPS_CBWC_CBWF_660_1		jgi|Coc_C169_1|37558|fgenesh1_pm.13_#_126	scaffold_13	4620_0_CBOZ3535.g1_CBOZ_CBPA					VOLCADRAFT_109454
[KO:K01649]	2.3.3.13	2-isopropylmalate synthase	CHLREDRAFT_196609		H632_c2616p0	contig-2616	a20873r199		jgi|ChlNC64A_1|49722|fgenesh3_pg.C_scaffold_1000420	scaffold_1			jgi|Coc_C169_1|36369|fgenesh1_pm.6_#_217	scaffold_6		Ot01g05170	OSTLU_29150	MICPUN_96632, 96641	MICPUCDRAFT_36068, 47814	VOLCADRAFT_78720
[KO:K01759]	4.4.1.5	lactoylglutathione lyase	CHLREDRAFT_106176		H632_c154p1	contig-154	a3550r393		jgi|ChlNC64A_1|52579|fgenesh3_pg.C_scaffold_11000155	scaffold_11			jgi|Coc_C169_1|35198|fgenesh1_pm.2_#_208	scaffold_2	4245_1_CBOZ_CBPA					VOLCADRAFT_97568
[KO:K01895]	6.2.1.1	acetyl-CoA synthetase	CHLREDRAFT_139750, 194063		H632_c2938p0	contig-2938	a7369r188		jgi|ChlNC64A_1|25835|e_gw1.18.20.1, |53931|fgenesh3_pg.C_scaffold_18000121	scaffold_32	CBPS_CBWC_CBWF_4016_0_CBWF7227.b1		jgi|Coc_C169_1|40843|fgenesh1_pg.5_#_46, |37408|fgenesh1_pm.12_#_151	scaffold_12	5109_0_CBOZ8412.b1_CBOZ_CBPA	Ot02g04430	OSTLU_44757	MICPUN_104547	MICPUCDRAFT_70212	VOLCADRAFT_103924, 58278
[KO:K01958]	6.4.1.1	pyruvate carboxylase	CHLREDRAFT_112730		H632_c600p0	contig-2401	a22437r131		jgi|ChlNC64A_1|138936|IGS.gm_22_00177	scaffold_22	CBPS_CBWC_CBWF_3301_0_CBWC2104.b1		jgi|Coc_C169_1|70|gw1.26.1.1	scaffold_26	4181_1_CBOZ_CBPA	Ot08g00930	OSTLU_32964	MICPUN_96455	MICPUCDRAFT_70187	VOLCADRAFT_102707
[KO:K01961]	6.4.1.2; 6.3.4.14	acetyl-CoA carboxylase, biotin carboxylase subunit	CHLREDRAFT_122970		H632_c600p0	contig-600	a37175r103		jgi|ChlNC64A_1|19734|e_gw1.3.665.1	scaffold_3	CBPS_CBWC_CBWF_3301_0_CBWC2104.b1		jgi|Coc_C169_1|52382|estExt_fgenesh1_pm.C_20137	scaffold_2	380_2_CBOZ_CBPA					VOLCADRAFT_77540
[KO:K01962]	6.4.1.2	acetyl-CoA carboxylase carboxyl transferase subunit alpha	CHLREDRAFT_184945		H632_c175p0	contig-175	a2070r339		jgi|ChlNC64A_1|36223|estExt_Genewise1Plus.C_150066	scaffold_15	CBPS_CBWC_CBWF_1521_2		jgi|Coc_C169_1|52652|estExt_fgenesh1_pm.C_30176	scaffold_3	3740_1_CBOZ_CBPA					VOLCADRAFT_120546
[KO:K01963]	6.4.1.2	acetyl-CoA carboxylase carboxyl transferase subunit beta	CHLREDRAFT_133238		H632_c1130p1	contig-1130	a5548r246				CBPS_CBWC_CBWF_1314_1		jgi|Coc_C169_1|9974|gw1.44.5.1	scaffold_44						VOLCADRAFT_82311
[KO:K02160]	---	acetyl-CoA carboxylase biotin carboxyl carrier protein	CHLREDRAFT_185478		H632_c256p0	contig-256	a3839r494		jgi|ChlNC64A_1|142410|IGS.gm_4_00551	scaffold_4	CBPS_CBWC_CBWF_1176_1		jgi|Coc_C169_1|61462|Genemark1.2252_g	scaffold_4	2542_1_CBOZ_CBPA					VOLCADRAFT_81953
[KO:K11262]	6.4.1.2; 6.3.4.14	acetyl-CoA carboxylase / biotin carboxylase	CHLREDRAFT_122441		H632_c553p0	contig-553	a76794r50		jgi|ChlNC64A_1|49952|fgenesh3_pg.C_scaffold_2000197	scaffold_2	CBPS_CBWC_CBWF_3301_0_CBWC2104.b1		jgi|Coc_C169_1|1116|gw1.27.8.1	scaffold_27		Ot01g03240	OSTLU_44400	MICPUN_113382	MICPUCDRAFT_31755	VOLCADRAFT_106840
00630_Glyoxylate_and_dicarboxylate_metabolism
[KO:K00025]	1.1.1.37	malate dehydrogenase	CHLREDRAFT_158129		H632_c1713p1	contig-1713	a1740r1589		jgi|ChlNC64A_1|36737|estExt_Genewise1Plus.C_210009	scaffold_1	CBPS_CBWC_CBWF_1762_1		jgi|Coc_C169_1|42884|fgenesh1_pg.11_#_92	scaffold_4	1790_1_CBOZ_CBPA	Ot06g00180	OSTLU_87414	MICPUN_99233	MICPUCDRAFT_49609	VOLCADRAFT_109769
[KO:K00026]	1.1.1.37	malate dehydrogenase	CHLREDRAFT_126023, 137163, 60444		H632_c1281p0	contig-1281	a17151r67, a44657r66, a6113r424		jgi|ChlNC64A_1|20080|e_gw1.3.256.1, |55945|estExt_fgenesh3_pm.C_10044, |48356|fgenesh3_kg.C_scaffold_29000007	scaffold_29, 3	CBPS_CBWC_CBWF_1446_1, _1129_1		jgi|Coc_C169_1|37816|fgenesh1_pm.15_#_92, |62531|Genemark1.3314_g, |5287|gw1.4.481.1	scaffold_15, 6, 4	3145_1_, 2114_1_CBOZ_CBPA	Ot03g00170, Ot06g02460	OSTLU_12282, 24671, 32875	MICPUN_94075, 96518, 97181	MICPUCDRAFT_37587, 63993	VOLCADRAFT_75816, 77493, 82979
[KO:K00284]	1.4.7.1	glutamate synthase (ferredoxin)	CHLREDRAFT_140487		H632_c5592p0	contig-5592	a158406r24		jgi|ChlNC64A_1|33620|estExt_Genewise1Plus.C_10525	scaffold_709	CBPS_CBWC_CBWF_29_1		jgi|Coc_C169_1|13331|e_gw1.4.7.1	scaffold_4	2272_1_CBOZ_CBPA	Ot14g02240	OSTLU_51965	MICPUN_63658	MICPUCDRAFT_70244	VOLCADRAFT_127156
[KO:K00600]	2.1.2.1	glycine hydroxymethyltransferase	CHLREDRAFT_194461, 196354, 196400		H632_c163p2, c308p2, c2333p0	contig-163, 308, 2333	a5948r357		jgi|ChlNC64A_1|37570|estExt_Genewise1Plus.C_350040, |49690|fgenesh3_pg.C_scaffold_1000388, |35692|estExt_Genewise1Plus.C_120034	scaffold_12	CBPS_CBWC_CBWF_707_1		jgi|Coc_C169_1|54763|estExt_fgenesh1_pm.C_200077, |36016|fgenesh1_pm.5_#_115, |2333|gw1.20.61.1	scaffold_20, 5	1471_1_CBOZ_CBPA	Ot03g00910, Ot14g02820	OSTLU_29554, 30421, 37794	MICPUN_104794, 63428, 96092	MICPUCDRAFT_29249, 49634, 49729	VOLCADRAFT_72779, 81312, 84741
[KO:K00626]	2.3.1.9	acetyl-CoA C-acetyltransferase	CHLREDRAFT_118204		H632_c3387p0	contig-3387	a991r574		jgi|ChlNC64A_1|56332|estExt_fgenesh3_pm.C_240017	scaffold_24	CBPS_CBWC_CBWF_2185_1		jgi|Coc_C169_1|4417|gw1.11.146.1	scaffold_11	149_1_CBOZ_CBPA					VOLCADRAFT_75176, 84837
[KO:K00830]	2.6.1.44; 2.6.1.45; 2.6.1.51	alanine-glyoxylate transaminase / serine-glyoxylate transaminase / serine-pyruvate transaminase	CHLREDRAFT_194541, 194609		H632_c26p1	contig-26	a3926r278		jgi|ChlNC64A_1|49619|fgenesh3_pg.C_scaffold_1000317, |33615|estExt_Genewise1Plus.C_10516	scaffold_1	CBPS_CBWC_CBWF_2892_1, _1333_1		jgi|Coc_C169_1|47174|estExt_fgenesh1_pg.C_60263, |36307|fgenesh1_pm.6_#_155	scaffold_6	3302_1_CBOZ_CBPA, 3187_0_CBOZ2100.b1_CBOZ_CBPA					VOLCADRAFT_74092, 75980
[KO:K01091]	3.1.3.18	phosphoglycolate phosphatase	CHLREDRAFT_127857, 142105						jgi|ChlNC64A_1|58743|estExt_fgenesh3_pg.C_200061, |24143|e_gw1.12.218.1	scaffold_12	CBPS_CBWC_CBWF_0_0_CBWF625.b1		jgi|Coc_C169_1|61099|Genemark1.1910_g	scaffold_3	0_0_CBOZ6733.b1_CBOZ_CBPA			MICPUN_96626	MICPUCDRAFT_36042	VOLCADRAFT_115779, 72753
[KO:K01455]	3.5.1.49	formamidase	CHLREDRAFT_132166										jgi|Coc_C169_1|35997|fgenesh1_pm.5_#_96	scaffold_5	3067_1_CBOZ_CBPA
[KO:K01602]	4.1.1.39	ribulose-bisphosphate carboxylase small chain	CHLREDRAFT_108283, 82986						jgi|ChlNC64A_1|48437|fgenesh3_pm.C_scaffold_1000060, |48438|fgenesh3_pm.C_scaffold_1000061	scaffold_1	CBPS_CBWC_CBWF_8_18		jgi|Coc_C169_1|8421|gw1.6.356.1, |36243|fgenesh1_pm.6_#_91	scaffold_6	26_1_CBOZ_CBPA	Ot18g02030	OSTLU_28400, 42060, 89572	MICPUN_104784, 104787	MICPUCDRAFT_37117, 66674	VOLCADRAFT_106899, 76826, 83349, 96572, 96573, 96575
[KO:K01638]	2.3.3.9	malate synthase	CHLREDRAFT_196328		H632_c1474p0	contig-1474	a8571r199		jgi|ChlNC64A_1|18745|e_gw1.1.83.1	scaffold_1	CBPS_CBWC_CBWF_660_1		jgi|Coc_C169_1|37558|fgenesh1_pm.13_#_126	scaffold_13	4620_0_CBOZ3535.g1_CBOZ_CBPA					VOLCADRAFT_109454
[KO:K01647]	2.3.3.1	citrate synthase	CHLREDRAFT_194915, 24263		H632_c73p0, c766p0	contig-73, 766	a4294r506, a44777r62		jgi|ChlNC64A_1|36373|estExt_Genewise1Plus.C_160155, |142756|IGS.gm_5_00085	scaffold_16, 5	CBPS_CBWC_CBWF_1772_2		jgi|Coc_C169_1|52535|estExt_fgenesh1_pm.C_30017, |36898|fgenesh1_pm.9_#_155	scaffold_3, 9	3389_1_, 1131_1_CBOZ_CBPA	Ot05g01770, Ot17g02320	OSTLU_24535, 37633	MICPUN_104822, 77978	MICPUCDRAFT_43905, 54016	VOLCADRAFT_79933, 82870
[KO:K01681]	4.2.1.3	aconitate hydratase	CHLREDRAFT_129025		H632_c374p1	contig-374	a1302r398		jgi|ChlNC64A_1|19655|e_gw1.3.393.1	scaffold_3	CBPS_CBWC_CBWF_744_1		jgi|Coc_C169_1|52444|estExt_fgenesh1_pm.C_20218	scaffold_2	1473_1_CBOZ_CBPA					VOLCADRAFT_76010
[KO:K01915]	6.3.1.2	glutamine synthetase	CHLREDRAFT_129468, 133971, 136895		H632_c1293p0	contig-1293	a12412r254		jgi|ChlNC64A_1|143431|IGS.gm_6_00005, |48539|fgenesh3_pm.C_scaffold_3000039	scaffold_3	CBPS_CBWC_CBWF_556_1		jgi|Coc_C169_1|63040|Genemark1.3823_g, |4237|gw1.6.190.1	scaffold_7, 6	207_1_, 764_1_CBOZ_CBPA	Ot01g04890	OSTLU_39960	MICPUN_112708, 113822, 58286	MICPUCDRAFT_30309, 4228, 55724	VOLCADRAFT_103492, 77041
[KO:K02437]	---	glycine cleavage system H protein	CHLREDRAFT_196067		H632_c327p1	contig-327	a12309r412		jgi|ChlNC64A_1|49048|fgenesh3_pm.C_scaffold_18000031	scaffold_18	CBPS_CBWC_CBWF_1832_1		jgi|Coc_C169_1|37366|fgenesh1_pm.12_#_109	scaffold_12	75_1_CBOZ_CBPA		OSTLU_27674	MICPUN_104779	MICPUCDRAFT_37647	VOLCADRAFT_77739
[KO:K03781]	1.11.1.6	catalase	CHLREDRAFT_150104		H632_c12p2	contig-12	a2121r692		jgi|ChlNC64A_1|57817|estExt_fgenesh3_pg.C_100041	scaffold_10	CBPS_CBWC_CBWF_978_1		jgi|Coc_C169_1|37793|fgenesh1_pm.15_#_69	scaffold_16	391_1_CBOZ_CBPA					VOLCADRAFT_74635
[KO:K11517]	1.1.3.15	(S)-2-hydroxy-acid oxidase	CHLREDRAFT_127775		H632_c791p0	contig-791	a64264r60		jgi|ChlNC64A_1|139480|IGS.gm_25_00031	scaffold_25			jgi|Coc_C169_1|4306|gw1.5.252.1	scaffold_5	2282_1_CBOZ_CBPA			MICPUN_57273	MICPUCDRAFT_45056	VOLCADRAFT_56216
[KO:K14272]	2.6.1.4; 2.6.1.2; 2.6.1.44; 2.6.1.-	glutamate--glyoxylate aminotransferase	CHLREDRAFT_206184		H632_c122p1	contig-122	a21828r172		jgi|ChlNC64A_1|134215|IGS.gm_11_00061	scaffold_11	CBPS_CBWC_CBWF_316_1		jgi|Coc_C169_1|34805|fgenesh1_pm.1_#_146	scaffold_1	515_2_CBOZ_CBPA					VOLCADRAFT_73258
[KO:K15893]	---	hydroxypyruvate reductase 1	CHLREDRAFT_128310		H632_c469p0	contig-469	a175100r21		jgi|ChlNC64A_1|33618|estExt_Genewise1Plus.C_10523	scaffold_1	CBPS_CBWC_CBWF_1882_1		jgi|Coc_C169_1|3854|gw1.6.164.1	scaffold_6	5130_0_CBOZ9865.b1_CBOZ_CBPA					VOLCADRAFT_89593
[KO:K15918]	2.7.1.31	D-glycerate 3-kinase	CHLREDRAFT_196366		H632_c3516p0	contig-3516	a25217r107		jgi|ChlNC64A_1|57258|estExt_fgenesh3_pg.C_50175	scaffold_5	CBPS_CBWC_CBWF_61_1		jgi|Coc_C169_1|37030|fgenesh1_pm.10_#_118	scaffold_10	1205_1_CBOZ_CBPA	Ot06g02040	OSTLU_41282	MICPUN_96229	MICPUCDRAFT_44766	VOLCADRAFT_94435
00640_Propanoate_metabolism
[KO:K00128]	1.2.1.3	aldehyde dehydrogenase (NAD+)	CHLREDRAFT_135609		H632_c1464p0	contig-1464	a16775r225		jgi|ChlNC64A_1|7731|gw1.1.111.1	scaffold_1	CBPS_CBWC_CBWF_498_1		jgi|Coc_C169_1|2147|gw1.23.34.1	scaffold_23	1093_1_CBOZ_CBPA	Ot01g04160	OSTLU_13873	MICPUN_113300	MICPUCDRAFT_55745	VOLCADRAFT_73567
[KO:K00140]	1.2.1.18; 1.2.1.27	malonate-semialdehyde dehydrogenase (acetylating) / methylmalonate-semialdehyde dehydrogenase	CHLREDRAFT_130434		H632_c2218p0	contig-2218	a9793r275		jgi|ChlNC64A_1|51901|fgenesh3_pg.C_scaffold_8000188	scaffold_8	CBPS_CBWC_CBWF_0_0_CBWF5994.b1		jgi|Coc_C169_1|42781|fgenesh1_pg.10_#_284	scaffold_10	3538_2_CBOZ_CBPA					VOLCADRAFT_59269
[KO:K00249]	1.3.8.7	acyl-CoA dehydrogenase	CHLREDRAFT_118751		H632_c2446p0	contig-4942	a110980r25		jgi|ChlNC64A_1|26769|e_gw1.22.13.1	scaffold_22			jgi|Coc_C169_1|664|gw1.5.40.1	scaffold_5
[KO:K00626]	2.3.1.9	acetyl-CoA C-acetyltransferase	CHLREDRAFT_118204		H632_c3387p0	contig-3387	a991r574		jgi|ChlNC64A_1|56332|estExt_fgenesh3_pm.C_240017	scaffold_24	CBPS_CBWC_CBWF_2185_1		jgi|Coc_C169_1|4417|gw1.11.146.1	scaffold_11	149_1_CBOZ_CBPA					VOLCADRAFT_75176, 84837
[KO:K01578]	4.1.1.9	malonyl-CoA decarboxylase	CHLREDRAFT_206199						jgi|ChlNC64A_1|141775|IGS.gm_38_00038	scaffold_38
[KO:K01895]	6.2.1.1	acetyl-CoA synthetase	CHLREDRAFT_139750, 194063		H632_c2938p0	contig-2938	a7369r188		jgi|ChlNC64A_1|25835|e_gw1.18.20.1, |53931|fgenesh3_pg.C_scaffold_18000121	scaffold_32	CBPS_CBWC_CBWF_4016_0_CBWF7227.b1		jgi|Coc_C169_1|40843|fgenesh1_pg.5_#_46, |37408|fgenesh1_pm.12_#_151	scaffold_12	5109_0_CBOZ8412.b1_CBOZ_CBPA	Ot02g04430	OSTLU_44757	MICPUN_104547	MICPUCDRAFT_70212	VOLCADRAFT_103924, 58278
[KO:K01899]	6.2.1.4; 6.2.1.5	succinyl-CoA synthetase alpha subunit	CHLREDRAFT_196570		H632_c1190p0	contig-1190	a599r276		jgi|ChlNC64A_1|141133|IGS.gm_31_00076	scaffold_31	CBPS_CBWC_CBWF_832_1		jgi|Coc_C169_1|38191|fgenesh1_pm.19_#_13	scaffold_19	938_1_CBOZ_CBPA	Ot03g05850	OSTLU_30915	MICPUN_54789	MICPUCDRAFT_45127	VOLCADRAFT_107577
[KO:K01900]	6.2.1.4; 6.2.1.5	succinyl-CoA synthetase beta subunit	CHLREDRAFT_24101		H632_c3367p0	contig-3367	a4199r506		jgi|ChlNC64A_1|139908|IGS.gm_27_00086	scaffold_27	CBPS_CBWC_CBWF_2222_1		jgi|Coc_C169_1|4111|gw1.19.128.1	scaffold_19	4348_1_CBOZ_CBPA		OSTLU_31367	MICPUN_104715	MICPUCDRAFT_34011	VOLCADRAFT_104417
[KO:K01961]	6.4.1.2; 6.3.4.14	acetyl-CoA carboxylase, biotin carboxylase subunit	CHLREDRAFT_122970		H632_c600p0	contig-600	a37175r103		jgi|ChlNC64A_1|19734|e_gw1.3.665.1	scaffold_3	CBPS_CBWC_CBWF_3301_0_CBWC2104.b1		jgi|Coc_C169_1|52382|estExt_fgenesh1_pm.C_20137	scaffold_2	380_2_CBOZ_CBPA					VOLCADRAFT_77540
[KO:K01962]	6.4.1.2	acetyl-CoA carboxylase carboxyl transferase subunit alpha	CHLREDRAFT_184945		H632_c175p0	contig-175	a2070r339		jgi|ChlNC64A_1|36223|estExt_Genewise1Plus.C_150066	scaffold_15	CBPS_CBWC_CBWF_1521_2		jgi|Coc_C169_1|52652|estExt_fgenesh1_pm.C_30176	scaffold_3	3740_1_CBOZ_CBPA					VOLCADRAFT_120546
[KO:K01963]	6.4.1.2	acetyl-CoA carboxylase carboxyl transferase subunit beta	CHLREDRAFT_133238		H632_c1130p1	contig-1130	a5548r246				CBPS_CBWC_CBWF_1314_1		jgi|Coc_C169_1|9974|gw1.44.5.1	scaffold_44						VOLCADRAFT_82311
[KO:K02160]	---	acetyl-CoA carboxylase biotin carboxyl carrier protein	CHLREDRAFT_185478		H632_c256p0	contig-256	a3839r494		jgi|ChlNC64A_1|142410|IGS.gm_4_00551	scaffold_4	CBPS_CBWC_CBWF_1176_1		jgi|Coc_C169_1|61462|Genemark1.2252_g	scaffold_4	2542_1_CBOZ_CBPA					VOLCADRAFT_81953
[KO:K11262]	6.4.1.2; 6.3.4.14	acetyl-CoA carboxylase / biotin carboxylase	CHLREDRAFT_122441		H632_c553p0	contig-553	a76794r50		jgi|ChlNC64A_1|49952|fgenesh3_pg.C_scaffold_2000197	scaffold_2	CBPS_CBWC_CBWF_3301_0_CBWC2104.b1		jgi|Coc_C169_1|1116|gw1.27.8.1	scaffold_27		Ot01g03240	OSTLU_44400	MICPUN_113382	MICPUCDRAFT_31755	VOLCADRAFT_106840
00650_Butanoate_metabolism
[KO:K00074]	1.1.1.157	3-hydroxybutyryl-CoA dehydrogenase	CHLREDRAFT_79407		H632_c1209p0	contig-1209	a11891r157		jgi|ChlNC64A_1|11293|gw1.10.155.1	scaffold_10	CBPS_CBWC_CBWF_2330_1		jgi|Coc_C169_1|37630|fgenesh1_pm.14_#_64	scaffold_14
[KO:K00161]	1.2.4.1	pyruvate dehydrogenase E1 component subunit alpha	CHLREDRAFT_193810		H632_c18p0	contig-18	a15629r260		jgi|ChlNC64A_1|56254|estExt_fgenesh3_pm.C_160009	scaffold_16	CBPS_CBWC_CBWF_2495_1		jgi|Coc_C169_1|3960|gw1.2.330.1	scaffold_2	1636_1_CBOZ_CBPA	Ot01g05450	OSTLU_29179	MICPUN_89160	MICPUCDRAFT_22101, 23282	VOLCADRAFT_104783, 68179
[KO:K00162]	1.2.4.1	pyruvate dehydrogenase E1 component subunit beta	CHLREDRAFT_139515, 190446		H632_c47p1, c1092p0	contig-47, 1092	a5471r660, a3135r359		jgi|ChlNC64A_1|48963|fgenesh3_pm.C_scaffold_14000037, |134298|IGS.gm_11_00144	scaffold_14, 11	CBPS_CBWC_CBWF_265_1		jgi|Coc_C169_1|35266|fgenesh1_pm.2_#_276, |15625|e_gw1.8.238.1	scaffold_2, 8	3095_1_, 2734_1_CBOZ_CBPA	Ot06g02870	OSTLU_12625	MICPUN_86033	MICPUCDRAFT_58821	VOLCADRAFT_108817, 77470
[KO:K00626]	2.3.1.9	acetyl-CoA C-acetyltransferase	CHLREDRAFT_118204		H632_c3387p0	contig-3387	a991r574		jgi|ChlNC64A_1|56332|estExt_fgenesh3_pm.C_240017	scaffold_24	CBPS_CBWC_CBWF_2185_1		jgi|Coc_C169_1|4417|gw1.11.146.1	scaffold_11	149_1_CBOZ_CBPA					VOLCADRAFT_75176, 84837
[KO:K01640]	4.1.3.4	hydroxymethylglutaryl-CoA lyase	CHLREDRAFT_195057		H632_c2327p0	contig-2327	a47812r76		jgi|ChlNC64A_1|10210|gw1.2.213.1	scaffold_2	CBPS_CBWC_CBWF_2314_1		jgi|Coc_C169_1|13706|e_gw1.4.580.1	scaffold_4	3055_1_CBOZ_CBPA					VOLCADRAFT_91759
[KO:K01641]	2.3.3.10	hydroxymethylglutaryl-CoA synthase	CHLREDRAFT_118594		H632_c1131p0	contig-1131	a28319r197		jgi|ChlNC64A_1|50079|fgenesh3_pg.C_scaffold_2000324	scaffold_2			jgi|Coc_C169_1|27384|estExt_Genewise1Plus.C_30063	scaffold_3	3188_1_CBOZ_CBPA					VOLCADRAFT_59473
[KO:K01652]	2.2.1.6	acetolactate synthase I/II/III large subunit	CHLREDRAFT_138180		H632_c2387p1	contig-2387	a35608r83		jgi|ChlNC64A_1|55348|fgenesh3_pg.C_scaffold_34000012	scaffold_34	CBPS_CBWC_CBWF_168_1		jgi|Coc_C169_1|18006|e_gw1.13.31.1	scaffold_13		Ot14g00970, Ot16g02270	OSTLU_51596, 89681	MICPUN_63569, 88562	MICPUCDRAFT_36361, 59390	VOLCADRAFT_73117
[KO:K01653]	2.2.1.6	acetolactate synthase I/III small subunit	CHLREDRAFT_5137		H632_c209p2	contig-209	a77928r22		jgi|ChlNC64A_1|33902|estExt_Genewise1Plus.C_20477	scaffold_2	CBPS_CBWC_CBWF_1091_1		jgi|Coc_C169_1|36345|fgenesh1_pm.6_#_193	scaffold_6		Ot11g00530	OSTLU_44053	MICPUN_109233	MICPUCDRAFT_50997	VOLCADRAFT_73781
00660_C5-Branched_dibasic_acid_metabolism
[KO:K01652]	2.2.1.6	acetolactate synthase I/II/III large subunit	CHLREDRAFT_138180		H632_c2387p1	contig-2387	a35608r83		jgi|ChlNC64A_1|55348|fgenesh3_pg.C_scaffold_34000012	scaffold_34	CBPS_CBWC_CBWF_168_1		jgi|Coc_C169_1|18006|e_gw1.13.31.1	scaffold_13		Ot14g00970, Ot16g02270	OSTLU_51596, 89681	MICPUN_63569, 88562	MICPUCDRAFT_36361, 59390	VOLCADRAFT_73117
[KO:K01653]	2.2.1.6	acetolactate synthase I/III small subunit	CHLREDRAFT_5137		H632_c209p2	contig-209	a77928r22		jgi|ChlNC64A_1|33902|estExt_Genewise1Plus.C_20477	scaffold_2	CBPS_CBWC_CBWF_1091_1		jgi|Coc_C169_1|36345|fgenesh1_pm.6_#_193	scaffold_6		Ot11g00530	OSTLU_44053	MICPUN_109233	MICPUCDRAFT_50997	VOLCADRAFT_73781
[KO:K01703]	4.2.1.33; 4.2.1.35	3-isopropylmalate/(R)-2-methylmalate dehydratase large subunit	CHLREDRAFT_132888		H632_c971p0	contig-971	a19809r76		jgi|ChlNC64A_1|56048|estExt_fgenesh3_pm.C_40040	scaffold_4	CBPS_CBWC_CBWF_1184_1		jgi|Coc_C169_1|13431|e_gw1.4.301.1	scaffold_4	1434_1_CBOZ_CBPA					VOLCADRAFT_75999
[KO:K01704]	4.2.1.33; 4.2.1.35	3-isopropylmalate/(R)-2-methylmalate dehydratase small subunit	CHLREDRAFT_126865			contig-508	a6476r231		jgi|ChlNC64A_1|12516|gw1.12.307.1	scaffold_12			jgi|Coc_C169_1|34971|fgenesh1_pm.1_#_312	scaffold_1	59_2_CBOZ_CBPA
00670_One_carbon_pool_by_folate
[KO:K00297]	1.5.1.20	methylenetetrahydrofolate reductase (NADPH)	CHLREDRAFT_111330		H632_c1762p0	contig-1762	a19008r243		jgi|ChlNC64A_1|133441|IGS.gm_1_00577	scaffold_1	CBPS_CBWC_CBWF_3990_0_CBWF6803.b1		jgi|Coc_C169_1|37973|fgenesh1_pm.17_#_2	scaffold_17	1483_1_CBOZ_CBPA					VOLCADRAFT_95450
[KO:K00548]	2.1.1.13	5-methyltetrahydrofolate--homocysteine methyltransferase	CHLREDRAFT_76715		H632_c16p2	contig-16	a46488r43		jgi|ChlNC64A_1|49110|fgenesh3_pm.C_scaffold_23000011	scaffold_212	CBPS_CBWC_CBWF_231_1					Ot03g04540	OSTLU_45056	MICPUN_105867	MICPUCDRAFT_45154
[KO:K00600]	2.1.2.1	glycine hydroxymethyltransferase	CHLREDRAFT_194461, 196354, 196400		H632_c163p2, c308p2, c2333p0	contig-163, 308, 2333	a5948r357		jgi|ChlNC64A_1|37570|estExt_Genewise1Plus.C_350040, |49690|fgenesh3_pg.C_scaffold_1000388, |35692|estExt_Genewise1Plus.C_120034	scaffold_12	CBPS_CBWC_CBWF_707_1		jgi|Coc_C169_1|54763|estExt_fgenesh1_pm.C_200077, |36016|fgenesh1_pm.5_#_115, |2333|gw1.20.61.1	scaffold_20, 5	1471_1_CBOZ_CBPA	Ot03g00910, Ot14g02820	OSTLU_29554, 30421, 37794	MICPUN_104794, 63428, 96092	MICPUCDRAFT_29249, 49634, 49729	VOLCADRAFT_72779, 81312, 84741
[KO:K00601]	2.1.2.2	phosphoribosylglycinamide formyltransferase	CHLREDRAFT_117678			contig-1151	a128013r32		jgi|ChlNC64A_1|132916|IGS.gm_1_00052	scaffold_1	CBPS_CBWC_CBWF_1096_1		jgi|Coc_C169_1|7958|gw1.7.336.1	scaffold_7	521_1_CBOZ_CBPA		OSTLU_6266	MICPUN_55714	MICPUCDRAFT_51596	VOLCADRAFT_66954
[KO:K00602]	2.1.2.3; 3.5.4.10	phosphoribosylaminoimidazolecarboxamide formyltransferase / IMP cyclohydrolase	CHLREDRAFT_116979		H632_c967p0	contig-967	a33945r150		jgi|ChlNC64A_1|48916|fgenesh3_pm.C_scaffold_13000006	scaffold_13			jgi|Coc_C169_1|36335|fgenesh1_pm.6_#_183	scaffold_6		Ot01g06240	OSTLU_14033	MICPUN_102516	MICPUCDRAFT_52529	VOLCADRAFT_74797
[KO:K00604]	2.1.2.9	methionyl-tRNA formyltransferase	CHLREDRAFT_83209		H632_c1151p1	contig-1151	a56919r27		jgi|ChlNC64A_1|134966|IGS.gm_12_00352	scaffold_12			jgi|Coc_C169_1|4988|gw1.12.218.1	scaffold_12	4475_0_CBOZ1795.b1_CBOZ_CBPA	Ot11g01750	OSTLU_43843	MICPUN_69926	MICPUCDRAFT_40021	VOLCADRAFT_106047
[KO:K00605]	2.1.2.10	aminomethyltransferase	CHLREDRAFT_196242		H632_c2816p0	contig-2816	a18688r212		jgi|ChlNC64A_1|48182|fgenesh3_kg.C_scaffold_6000004	scaffold_6	CBPS_CBWC_CBWF_2569_1		jgi|Coc_C169_1|47327|estExt_fgenesh1_pg.C_70142	scaffold_7	3621_2_CBOZ_CBPA	Ot10g02850	OSTLU_26241	MICPUN_59804		VOLCADRAFT_107582
[KO:K01934]	6.3.3.2	5-formyltetrahydrofolate cyclo-ligase	CHLREDRAFT_127515, 196694		H632_c533p1	contig-533	a238r827		jgi|ChlNC64A_1|136024|IGS.gm_15_00120, |144075|IGS.gm_7_00017	scaffold_15, 7			jgi|Coc_C169_1|7268|gw1.23.129.1	scaffold_23	1493_1_CBOZ_CBPA			MICPUN_71689	MICPUCDRAFT_49848
[KO:K13998]	1.5.1.3; 2.1.1.45	dihydrofolate reductase / thymidylate synthase	CHLREDRAFT_139742		H632_c2296p0	contig-2296	a22198r112		jgi|ChlNC64A_1|48756|fgenesh3_pm.C_scaffold_8000027	scaffold_8	CBPS_CBWC_CBWF_632_1		jgi|Coc_C169_1|37014|fgenesh1_pm.10_#_102	scaffold_10		Ot01g05780	OSTLU_49676	MICPUN_58650	MICPUCDRAFT_56456	VOLCADRAFT_66296
00710_Carbon_fixation_in_photosynthetic_organisms
[KO:K00025]	1.1.1.37	malate dehydrogenase	CHLREDRAFT_158129		H632_c1713p1	contig-1713	a1740r1589		jgi|ChlNC64A_1|36737|estExt_Genewise1Plus.C_210009	scaffold_1	CBPS_CBWC_CBWF_1762_1		jgi|Coc_C169_1|42884|fgenesh1_pg.11_#_92	scaffold_4	1790_1_CBOZ_CBPA	Ot06g00180	OSTLU_87414	MICPUN_99233	MICPUCDRAFT_49609	VOLCADRAFT_109769
[KO:K00026]	1.1.1.37	malate dehydrogenase	CHLREDRAFT_126023, 137163, 60444		H632_c1281p0	contig-1281	a17151r67, a44657r66, a6113r424		jgi|ChlNC64A_1|20080|e_gw1.3.256.1, |55945|estExt_fgenesh3_pm.C_10044, |48356|fgenesh3_kg.C_scaffold_29000007	scaffold_29, 3	CBPS_CBWC_CBWF_1446_1, _1129_1		jgi|Coc_C169_1|37816|fgenesh1_pm.15_#_92, |62531|Genemark1.3314_g, |5287|gw1.4.481.1	scaffold_15, 6, 4	3145_1_, 2114_1_CBOZ_CBPA	Ot03g00170, Ot06g02460	OSTLU_12282, 24671, 32875	MICPUN_94075, 96518, 97181	MICPUCDRAFT_37587, 63993	VOLCADRAFT_75816, 77493, 82979
[KO:K00028]	1.1.1.39	malate dehydrogenase (decarboxylating)	CHLREDRAFT_196833		H632_c101p1	contig-101	a31746r151		jgi|ChlNC64A_1|136414|IGS.gm_16_00137	scaffold_10	CBPS_CBWC_CBWF_3287_0_CBWC1910.b1		jgi|Coc_C169_1|54433|estExt_fgenesh1_pm.C_160075	scaffold_16	3848_1_CBOZ_CBPA	Ot12g02700	OSTLU_26919	MICPUN_55180
[KO:K00029]	1.1.1.40	malate dehydrogenase (oxaloacetate-decarboxylating)(NADP+)	CHLREDRAFT_126820, 147722, 196351, 196831, 196832		H632_c101p1	contig-2198	a44653r76, a60782r54		jgi|ChlNC64A_1|7239|gw1.3.59.1, |136414|IGS.gm_16_00137	scaffold_3, 10	CBPS_CBWC_CBWF_727_2		jgi|Coc_C169_1|62489|Genemark1.3272_g, |52449|estExt_fgenesh1_pm.C_20225, |34895|fgenesh1_pm.1_#_236, |54433|estExt_fgenesh1_pm.C_160075	scaffold_6, 2, 1, 16	3848_1_CBOZ_CBPA	Ot01g00040, Ot04g03750, Ot06g03980, Ot07g00930	OSTLU_12474, 41212	MICPUN_62430, 81102, 97726	MICPUCDRAFT_1435, 21535, 45850	VOLCADRAFT_77886, 78607
[KO:K00051]	1.1.1.82	malate dehydrogenase (NADP+)	CHLREDRAFT_192083		H632_c1713p1	contig-1713	a1740r1589		jgi|ChlNC64A_1|49623|fgenesh3_pg.C_scaffold_1000321	scaffold_1	CBPS_CBWC_CBWF_1424_1		jgi|Coc_C169_1|36224|fgenesh1_pm.6_#_72	scaffold_6	1790_1_CBOZ_CBPA	Ot08g00890	OSTLU_42336	MICPUN_104869	MICPUCDRAFT_57848	VOLCADRAFT_76573
[KO:K00615]	2.2.1.1	transketolase	CHLREDRAFT_141319		H632_c699p0	contig-699	a12415r118		jgi|ChlNC64A_1|58062|estExt_fgenesh3_pg.C_120080	scaffold_12	CBPS_CBWC_CBWF_288_1		jgi|Coc_C169_1|49177|estExt_fgenesh1_pg.C_220069	scaffold_22	4304_1_CBOZ_CBPA	Ot07g04240	OSTLU_16284	MICPUN_104852	MICPUCDRAFT_34943	VOLCADRAFT_75893
[KO:K00814]	2.6.1.2	alanine transaminase	CHLREDRAFT_191703		H632_c122p1	contig-122	a17742r237		jgi|ChlNC64A_1|48082|fgenesh3_kg.C_scaffold_1000018	scaffold_11	CBPS_CBWC_CBWF_316_1		jgi|Coc_C169_1|2904|gw1.6.134.1	scaffold_6	515_2_CBOZ_CBPA	Ot03g02840	OSTLU_30612	MICPUN_90107	MICPUCDRAFT_46391	VOLCADRAFT_120326
[KO:K00855]	2.7.1.19	phosphoribulokinase	CHLREDRAFT_195910		H632_c3264p0	contig-3264	a14436r246		jgi|ChlNC64A_1|31167|estExt_Genewise1.C_100355	scaffold_10	CBPS_CBWC_CBWF_1907_1		jgi|Coc_C169_1|52342|estExt_fgenesh1_pm.C_20090	scaffold_2	83_1_CBOZ_CBPA	Ot04g02900	OSTLU_45513	MICPUN_104911	MICPUCDRAFT_49540	VOLCADRAFT_104265
[KO:K00873]	2.7.1.40	pyruvate kinase	CHLREDRAFT_118203, 136854, 196263		H632_c144p1, c1108p1	contig-144, 1108	a3345r247		jgi|ChlNC64A_1|34881|estExt_Genewise1Plus.C_60179, |16416|gw1.4.521.1	scaffold_18, 10	CBPS_CBWC_CBWF_348_2, _1822_2		jgi|Coc_C169_1|36469|fgenesh1_pm.7_#_85, |37635|fgenesh1_pm.14_#_69	scaffold_7, 14	3013_1_CBOZ_CBPA	Ot16g00440, Ot16g00530	OSTLU_27708, 40662	MICPUN_100158, 104841, 112645, 56945, 82586, 93072	MICPUCDRAFT_16253, 19660, 48021, 49534, 49922, 64256	VOLCADRAFT_68572, 82954, 84504
[KO:K00927]	2.7.2.3	phosphoglycerate kinase	CHLREDRAFT_132210		H632_c4037p0	contig-4037	a11639r461		jgi|ChlNC64A_1|48093|fgenesh3_kg.C_scaffold_2000001	scaffold_2	CBPS_CBWC_CBWF_2205_1		jgi|Coc_C169_1|17152|e_gw1.11.105.1	scaffold_2	158_1_CBOZ_CBPA	Ot02g05220	OSTLU_30288, 46028	MICPUN_104767, 104803	MICPUCDRAFT_17660, 69728	VOLCADRAFT_81546
[KO:K01006]	2.7.9.1	pyruvate,orthophosphate dikinase	CHLREDRAFT_133570, 196616						jgi|ChlNC64A_1|28160|e_gw1.32.5.1	scaffold_32	CBPS_CBWC_CBWF_1366_1		jgi|Coc_C169_1|34895|fgenesh1_pm.1_#_236	scaffold_2	3848_1_CBOZ_CBPA	Ot02g06800	OSTLU_29856	MICPUN_104991	MICPUCDRAFT_27547	VOLCADRAFT_66258, 74670
[KO:K01100]	3.1.3.37	sedoheptulose-bisphosphatase	CHLREDRAFT_189186		H632_c1038p0	contig-1038	a326629r13		jgi|ChlNC64A_1|34279|estExt_Genewise1Plus.C_30747	scaffold_3	CBPS_CBWC_CBWF_4060_0_CBWF7922.b1		jgi|Coc_C169_1|4381|gw1.25.44.1	scaffold_25	1312_1_CBOZ_CBPA	Ot03g05460	OSTLU_4189	MICPUN_91307	MICPUCDRAFT_49360	VOLCADRAFT_72935
[KO:K01595]	4.1.1.31	phosphoenolpyruvate carboxylase	CHLREDRAFT_80312		H632_c413p0	contig-413	a28803r94		jgi|ChlNC64A_1|56337|estExt_fgenesh3_pm.C_240023	scaffold_24	CBPS_CBWC_CBWF_128_2		jgi|Coc_C169_1|52173|estExt_fgenesh1_pm.C_10166	scaffold_1		Ot12g02990	OSTLU_51006	MICPUN_104763	MICPUCDRAFT_31189	VOLCADRAFT_56464, 59445
[KO:K01602]	4.1.1.39	ribulose-bisphosphate carboxylase small chain	CHLREDRAFT_108283, 82986						jgi|ChlNC64A_1|48437|fgenesh3_pm.C_scaffold_1000060, |48438|fgenesh3_pm.C_scaffold_1000061	scaffold_1	CBPS_CBWC_CBWF_8_18		jgi|Coc_C169_1|8421|gw1.6.356.1, |36243|fgenesh1_pm.6_#_91	scaffold_6	26_1_CBOZ_CBPA	Ot18g02030	OSTLU_28400, 42060, 89572	MICPUN_104784, 104787	MICPUCDRAFT_37117, 66674	VOLCADRAFT_106899, 76826, 83349, 96572, 96573, 96575
[KO:K01610]	4.1.1.49	phosphoenolpyruvate carboxykinase (ATP)	CHLREDRAFT_196612		H632_c2237p0	contig-2237	a7407r669		jgi|ChlNC64A_1|49535|fgenesh3_pg.C_scaffold_1000233	scaffold_25	CBPS_CBWC_CBWF_1777_1		jgi|Coc_C169_1|36074|fgenesh1_pm.5_#_173	scaffold_5	797_1_CBOZ_CBPA					VOLCADRAFT_106350, 81482
[KO:K01623]	4.1.2.13	fructose-bisphosphate aldolase, class I	CHLREDRAFT_152892, 196304, 24459, 29185		H632_c455p2	contig-455	a2214r1400		jgi|ChlNC64A_1|139851|IGS.gm_27_00029, |48370|fgenesh3_kg.C_scaffold_36000001, |56358|estExt_fgenesh3_pm.C_260012, |48836|fgenesh3_pm.C_scaffold_11000013	scaffold_11, 26	CBPS_CBWC_CBWF_1016_1, _8_84		jgi|Coc_C169_1|4317|gw1.12.182.1, |35631|fgenesh1_pm.4_#_33, |37978|fgenesh1_pm.17_#_7, |5297|gw1.1.458.1	scaffold_12, 1, 17	412_3_CBOZ_CBPA	Ot01g03020, Ot03g00610	OSTLU_13796, 33820	MICPUN_104729, 104949	MICPUCDRAFT_45108	VOLCADRAFT_69480, 79447, 82483, 83313
[KO:K01783]	5.1.3.1	ribulose-phosphate 3-epimerase	CHLREDRAFT_135614, 6964		H632_c1276p0, c169p2	contig-1276, 169	a101521r61, a44616r49		jgi|ChlNC64A_1|142103|IGS.gm_4_00244, |18474|e_gw1.1.720.1	scaffold_4, 1	CBPS_CBWC_CBWF_445_1		jgi|Coc_C169_1|37863|fgenesh1_pm.16_#_28, |6367|gw1.16.215.1	scaffold_16	1584_1_CBOZ_CBPA	Ot06g01930	OSTLU_17265, 32100, 41053	MICPUN_104768, 80507	MICPUCDRAFT_47473, 58794	VOLCADRAFT_109319
[KO:K01803]	5.3.1.1	triosephosphate isomerase (TIM)	CHLREDRAFT_26265		H632_c1491p1	contig-951	a115967r31		jgi|ChlNC64A_1|11092|gw1.15.138.1	scaffold_15	CBPS_CBWC_CBWF_2202_1		jgi|Coc_C169_1|10565|gw1.3.626.1	scaffold_3	3289_1_CBOZ_CBPA	Ot09g00080	OSTLU_24989, 36521, 43602	MICPUN_64258, 86041	MICPUCDRAFT_34435, 46562	VOLCADRAFT_109969
[KO:K01807]	5.3.1.6	ribose 5-phosphate isomerase A	CHLREDRAFT_205912, 55838		H632_c1642p0	contig-1642	a30246r93		jgi|ChlNC64A_1|141332|IGS.gm_33_00042, |48569|fgenesh3_pm.C_scaffold_4000004	scaffold_4	CBPS_CBWC_CBWF_1619_1		jgi|Coc_C169_1|60863|Genemark1.1674_g, |7090|gw1.4.654.1	scaffold_3	4905_0_CBOZ6311.b1_CBOZ_CBPA	Ot05g04200	OSTLU_12567	MICPUN_100773, 97166	MICPUCDRAFT_15487	VOLCADRAFT_104693, 95072
[KO:K03841]	3.1.3.11	fructose-1,6-bisphosphatase I	CHLREDRAFT_24084		H632_c1274p0	contig-2061	a18659r163		jgi|ChlNC64A_1|51910|fgenesh3_pg.C_scaffold_8000197	scaffold_8	CBPS_CBWC_CBWF_2451_1		jgi|Coc_C169_1|35430|fgenesh1_pm.3_#_105	scaffold_3	3240_1_CBOZ_CBPA	Ot03g00330	OSTLU_15350, 25840, 30353	MICPUN_103879, 87980, 96739	MICPUCDRAFT_14054, 14601, 48988	VOLCADRAFT_103791
[KO:K05298]	1.2.1.13	glyceraldehyde-3-phosphate dehydrogenase (NADP+) (phosphorylating)	CHLREDRAFT_129019		H632_c302p0	contig-302	a1647r735		jgi|ChlNC64A_1|49269|fgenesh3_pm.C_scaffold_35000008	scaffold_35	CBPS_CBWC_CBWF_622_1		jgi|Coc_C169_1|44406|fgenesh1_pg.18_#_8	scaffold_18	745_1_CBOZ_CBPA	Ot01g01490, Ot10g03520	OSTLU_28757, 37993	MICPUN_104695, 104876	MICPUCDRAFT_25339, 49403	VOLCADRAFT_76662
[KO:K14272]	2.6.1.4; 2.6.1.2; 2.6.1.44; 2.6.1.-	glutamate--glyoxylate aminotransferase	CHLREDRAFT_206184		H632_c122p1	contig-122	a21828r172		jgi|ChlNC64A_1|134215|IGS.gm_11_00061	scaffold_11	CBPS_CBWC_CBWF_316_1		jgi|Coc_C169_1|34805|fgenesh1_pm.1_#_146	scaffold_1	515_2_CBOZ_CBPA					VOLCADRAFT_73258
[KO:K14454]	2.6.1.1	aspartate aminotransferase, cytoplasmic	CHLREDRAFT_174097		H632_c1503p0	contig-1503	a6744r266		jgi|ChlNC64A_1|59142|estExt_fgenesh3_pg.C_270006	scaffold_2	CBPS_CBWC_CBWF_2147_1		jgi|Coc_C169_1|38233|fgenesh1_pm.19_#_55	scaffold_19	1112_1_CBOZ_CBPA					VOLCADRAFT_82929
[KO:K14455]	2.6.1.1	aspartate aminotransferase, mitochondrial	CHLREDRAFT_126943		H632_c1503p0	contig-1503	a6744r266		jgi|ChlNC64A_1|54903|fgenesh3_pg.C_scaffold_27000007	scaffold_2	CBPS_CBWC_CBWF_2147_1		jgi|Coc_C169_1|2107|gw1.14.65.1	scaffold_14	1112_1_CBOZ_CBPA	Ot05g01290	OSTLU_31597
00730_Thiamine_metabolism
[KO:K00878]	2.7.1.50	hydroxyethylthiazole kinase	CHLREDRAFT_126905			contig-1309	a29167r112		jgi|ChlNC64A_1|136315|IGS.gm_16_00038	scaffold_16			jgi|Coc_C169_1|6833|gw1.16.245.1	scaffold_16		Ot12g01040	OSTLU_26755
[KO:K00949]	2.7.6.2	thiamine pyrophosphokinase	CHLREDRAFT_72868		H632_c330p1	contig-330	a6900r613		jgi|ChlNC64A_1|25929|e_gw1.18.193.1	scaffold_18			jgi|Coc_C169_1|37384|fgenesh1_pm.12_#_127	scaffold_12	4003_1_CBOZ_CBPA			MICPUN_109022	MICPUCDRAFT_6378
[KO:K03147]	---	thiamine biosynthesis protein ThiC	CHLREDRAFT_196900						jgi|ChlNC64A_1|136333|IGS.gm_16_00056		CBPS_CBWC_CBWF_107_1		jgi|Coc_C169_1|43739|fgenesh1_pg.14_#_154	scaffold_14						VOLCADRAFT_105807
[KO:K04487]	2.8.1.7	cysteine desulfurase	CHLREDRAFT_167884, 191269		H632_c3596p0	contig-4166	a5869r217		jgi|ChlNC64A_1|48746|fgenesh3_pm.C_scaffold_8000017, |55088|fgenesh3_pg.C_scaffold_29000040	scaffold_8, 29	CBPS_CBWC_CBWF_170_1		jgi|Coc_C169_1|10394|gw1.6.458.1, |3536|gw1.6.155.1	scaffold_6		Ot03g02290, Ot09g03650	OSTLU_16873, 45194	MICPUN_108046, 68497	MICPUCDRAFT_15684, 21333	VOLCADRAFT_109150, 95927
[KO:K06928]	3.6.1.15	nucleoside-triphosphatase THEP1	CHLREDRAFT_100906																	VOLCADRAFT_80686
[KO:K11717]	2.8.1.7; 4.4.1.16	cysteine desulfurase / selenocysteine lyase	CHLREDRAFT_196776		H632_c1458p0	contig-2800	a20782r146		jgi|ChlNC64A_1|9161|gw1.5.165.1	scaffold_5	CBPS_CBWC_CBWF_779_1		jgi|Coc_C169_1|37143|fgenesh1_pm.11_#_40	scaffold_11		Ot03g03050	OSTLU_19438	MICPUN_78629	MICPUCDRAFT_38219	VOLCADRAFT_63817
00740_Riboflavin_metabolism
[KO:K00793]	2.5.1.9	riboflavin synthase	CHLREDRAFT_25877		H632_c1915p0	contig-1915	a50016r71		jgi|ChlNC64A_1|37484|estExt_Genewise1Plus.C_320041	scaffold_32	CBPS_CBWC_CBWF_0_0_CBWC5281.b1		jgi|Coc_C169_1|44812|fgenesh1_pg.20_#_11	scaffold_20		Ot07g03230	OSTLU_8148	MICPUN_55974	MICPUCDRAFT_57346
[KO:K00794]	2.5.1.78	6,7-dimethyl-8-ribityllumazine synthase	CHLREDRAFT_186616		H632_c4530p0	contig-4530	a18431r164		jgi|ChlNC64A_1|139481|IGS.gm_25_00032	scaffold_25			jgi|Coc_C169_1|7625|gw1.5.467.1	scaffold_5			OSTLU_8942			VOLCADRAFT_108879
[KO:K00861]	2.7.1.26	riboflavin kinase	CHLREDRAFT_128353		H632_c1972p0	contig-1972	a42595r51		jgi|ChlNC64A_1|34631|estExt_Genewise1Plus.C_50153	scaffold_5	CBPS_CBWC_CBWF_633_1		jgi|Coc_C169_1|16055|e_gw1.9.180.1	scaffold_9	2240_1_CBOZ_CBPA	Ot01g05730, Ot01g06150	OSTLU_29210	MICPUN_86059	MICPUCDRAFT_36086, 8520	VOLCADRAFT_103251
[KO:K00953]	2.7.7.2	FAD synthetase	CHLREDRAFT_13453		H632_c4p0	contig-4	a21934r119		jgi|ChlNC64A_1|9169|gw1.37.30.1	scaffold_37			jgi|Coc_C169_1|2257|gw1.12.74.1	scaffold_12						VOLCADRAFT_99481
[KO:K11752]	3.5.4.26; 1.1.1.193	diaminohydroxyphosphoribosylaminopyrimidine deaminase / 5-amino-6-(5-phosphoribosylamino)uracil reductase	CHLREDRAFT_103066			contig-1607	a8499r201		jgi|ChlNC64A_1|137887|IGS.gm_2_00354	scaffold_2			jgi|Coc_C169_1|11631|e_gw1.1.790.1	scaffold_1	2201_1_CBOZ_CBPA				MICPUCDRAFT_17954
[KO:K14652]	4.1.99.12; 3.5.4.25	3,4-dihydroxy 2-butanone 4-phosphate synthase / GTP cyclohydrolase II	CHLREDRAFT_102099		H632_c611p2	contig-611	a16837r180		jgi|ChlNC64A_1|7896|gw1.12.95.1	scaffold_12			jgi|Coc_C169_1|39889|fgenesh1_pg.2_#_501	scaffold_2	0_0_CBPA8018.b1_CBOZ_CBPA	Ot08g01580	OSTLU_87976	MICPUN_59692	MICPUCDRAFT_45490	VOLCADRAFT_61351
00750_Vitamin_B6_metabolism
[KO:K00831]	2.6.1.52	phosphoserine aminotransferase	CHLREDRAFT_188476		H632_c24p3	contig-24	a9294r472		jgi|ChlNC64A_1|142929|IGS.gm_5_00258	scaffold_5	CBPS_CBWC_CBWF_2611_1		jgi|Coc_C169_1|42683|fgenesh1_pg.10_#_186	scaffold_10	4753_0_CBOZ4939.b1_CBOZ_CBPA	Ot03g03290	OSTLU_12357	MICPUN_93571	MICPUCDRAFT_24522	VOLCADRAFT_81234
[KO:K00868]	2.7.1.35	pyridoxine kinase	CHLREDRAFT_205603		H632_c57p3	contig-57	a14547r88		jgi|ChlNC64A_1|56126|estExt_fgenesh3_pm.C_80018	scaffold_8	CBPS_CBWC_CBWF_1546_1		jgi|Coc_C169_1|54189|estExt_fgenesh1_pm.C_140011	scaffold_14	3932_1_CBOZ_CBPA			MICPUN_96376	MICPUCDRAFT_44424	VOLCADRAFT_32265
[KO:K01733]	4.2.3.1	threonine synthase	CHLREDRAFT_127384		H632_c646p2	contig-646	a10936r380		jgi|ChlNC64A_1|48759|fgenesh3_pm.C_scaffold_8000030	scaffold_8	CBPS_CBWC_CBWF_726_1		jgi|Coc_C169_1|44605|fgenesh1_pg.18_#_207	scaffold_18	2380_1_CBOZ_CBPA	Ot04g01610, Ot06g04190	OSTLU_32331, 37018	MICPUN_60673	MICPUCDRAFT_45441	VOLCADRAFT_103465
[KO:K08681]	4.3.3.6	5'-phosphate synthase pdxT subunit	CHLREDRAFT_99391		H632_c456p1	contig-456	a32639r91		jgi|ChlNC64A_1|48689|fgenesh3_pm.C_scaffold_6000013	scaffold_6			jgi|Coc_C169_1|8054|gw1.7.342.1	scaffold_7	191_1_CBOZ_CBPA	Ot17g02660	OSTLU_7092	MICPUN_90898	MICPUCDRAFT_23003	VOLCADRAFT_66485
[KO:K13248]	3.1.3.74	pyridoxal phosphate phosphatase PHOSPHO2	CHLREDRAFT_117519				a88725r30		jgi|ChlNC64A_1|135155|IGS.gm_13_00083	scaffold_19	CBPS_CBWC_CBWF_2476_1		jgi|Coc_C169_1|41939|fgenesh1_pg.7_#_343	scaffold_7						VOLCADRAFT_33391
00760_Nicotinate_and_nicotinamide_metabolism
[KO:K00278]	1.4.3.16	L-aspartate oxidase	CHLREDRAFT_58579		H632_c721p1	contig-721	a4666r282		jgi|ChlNC64A_1|140919|IGS.gm_3_00658	scaffold_3	CBPS_CBWC_CBWF_1681_1		jgi|Coc_C169_1|47995|estExt_fgenesh1_pg.C_110159	scaffold_11	3130_1_CBOZ_CBPA	Ot08g00810	OSTLU_24902	MICPUN_96095	MICPUCDRAFT_66855	VOLCADRAFT_75739
[KO:K00323]	1.6.1.2	NAD(P) transhydrogenase	CHLREDRAFT_139758		H632_c1774p0	contig-1774	a6824r359		jgi|ChlNC64A_1|34729|estExt_Genewise1Plus.C_50377	scaffold_2	CBPS_CBWC_CBWF_169_3							MICPUN_55617	MICPUCDRAFT_70229	VOLCADRAFT_58405, 80229
[KO:K00767]	2.4.2.19	nicotinate-nucleotide pyrophosphorylase (carboxylating)	CHLREDRAFT_137676		H632_c138p3	contig-138	a11366r152		jgi|ChlNC64A_1|140808|IGS.gm_3_00547	scaffold_3			jgi|Coc_C169_1|5724|gw1.21.127.1	scaffold_21		Ot03g04060	OSTLU_33946	MICPUN_83796	MICPUCDRAFT_30783	VOLCADRAFT_106344
[KO:K00858]	2.7.1.23	NAD+ kinase	CHLREDRAFT_196779		H632_c486p1	contig-486	a18509r121		jgi|ChlNC64A_1|143672|IGS.gm_6_00246	scaffold_6	CBPS_CBWC_CBWF_2828_1		jgi|Coc_C169_1|3360|gw1.7.173.1	scaffold_7	3727_1_CBOZ_CBPA		OSTLU_35817, 43339	MICPUN_67699	MICPUCDRAFT_15655	VOLCADRAFT_118925, 59341
[KO:K01240]	3.2.2.3	uridine nucleosidase	CHLREDRAFT_23981		H632_c246p0	contig-246	a47054r65		jgi|ChlNC64A_1|48262|fgenesh3_kg.C_scaffold_15000004	scaffold_15	CBPS_CBWC_CBWF_1164_1		jgi|Coc_C169_1|11084|e_gw1.1.561.1	scaffold_1	3701_0_CBOZ7609.g1_CBOZ_CBPA			MICPUN_58579	MICPUCDRAFT_15593	VOLCADRAFT_55637
[KO:K01950]	6.3.5.1	NAD+ synthase (glutamine-hydrolysing)	CHLREDRAFT_127918		H632_c201p1	contig-201	a27497r53		jgi|ChlNC64A_1|23612|e_gw1.11.17.1	scaffold_11			jgi|Coc_C169_1|1258|gw1.8.52.1	scaffold_8		Ot09g01890	OSTLU_33475	MICPUN_57164, 92688	MICPUCDRAFT_46678	VOLCADRAFT_90620
[KO:K03426]	3.6.1.22	NAD+ diphosphatase	CHLREDRAFT_117836		H632_c2767p0	contig-2767	a64174r47		jgi|ChlNC64A_1|137573|IGS.gm_2_00040	scaffold_2			jgi|Coc_C169_1|61048|Genemark1.1859_g	scaffold_3	0_0_CBOZ683.b1_CBOZ_CBPA
[KO:K03517]	2.5.1.72	quinolinate synthase	CHLREDRAFT_112673			contig-5204	a34552r65		jgi|ChlNC64A_1|34146|estExt_Genewise1Plus.C_30434	scaffold_3	CBPS_CBWC_CBWF_1730_1		jgi|Coc_C169_1|36584|fgenesh1_pm.7_#_200	scaffold_7	3923_0_CBOZ4894.b1_CBOZ_CBPA	Ot17g01940	OSTLU_28143	MICPUN_105643	MICPUCDRAFT_54041	VOLCADRAFT_106629
[KO:K03787]	3.1.3.5	5'-nucleotidase	CHLREDRAFT_144281		H632_c1980p0	contig-1980	a27719r138		jgi|ChlNC64A_1|137835|IGS.gm_2_00302	scaffold_2			jgi|Coc_C169_1|6176|gw1.10.331.1	scaffold_10				MICPUN_106294	MICPUCDRAFT_47829	VOLCADRAFT_86716
[KO:K06210]	2.7.7.1; 2.7.7.18	nicotinamide mononucleotide adenylyltransferase	CHLREDRAFT_102803		H632_c21p1	contig-21	a354053r17		jgi|ChlNC64A_1|137409|IGS.gm_19_00176	scaffold_19			jgi|Coc_C169_1|19006|e_gw1.16.301.1	scaffold_16	3805_1_CBOZ_CBPA					VOLCADRAFT_55034
00770_Pantothenate_and_CoA_biosynthesis
[KO:K00053]	1.1.1.86	ketol-acid reductoisomerase	CHLREDRAFT_140839		H632_c106p2	contig-106	a8861r375		jgi|ChlNC64A_1|58001|estExt_fgenesh3_pg.C_110205	scaffold_11	CBPS_CBWC_CBWF_325_1		jgi|Coc_C169_1|15892|e_gw1.8.74.1	scaffold_8	2800_1_CBOZ_CBPA	Ot03g02490	OSTLU_30575	MICPUN_57653	MICPUCDRAFT_49717	VOLCADRAFT_74529
[KO:K00207]	1.3.1.2	dihydropyrimidine dehydrogenase (NADP+)	CHLREDRAFT_134846		H632_c750p1	contig-750	a6554r192		jgi|ChlNC64A_1|48243|fgenesh3_kg.C_scaffold_12000014	scaffold_129	CBPS_CBWC_CBWF_405_1		jgi|Coc_C169_1|3972|gw1.14.146.1	scaffold_14				MICPUN_109450		VOLCADRAFT_80405
[KO:K00606]	2.1.2.11	3-methyl-2-oxobutanoate hydroxymethyltransferase	CHLREDRAFT_196344		H632_c17p3	contig-17	a21907r68		jgi|ChlNC64A_1|30883|estExt_Genewise1.C_80346	scaffold_8	CBPS_CBWC_CBWF_34_0_CBWC1058.b1		jgi|Coc_C169_1|36975|fgenesh1_pm.10_#_63	scaffold_10	4487_0_CBOZ1945.b1_CBOZ_CBPA	Ot02g04650	OSTLU_119531	MICPUN_107406	MICPUCDRAFT_34318
[KO:K00826]	2.6.1.42	branched-chain amino acid aminotransferase	CHLREDRAFT_187392, 206169, 30522		H632_c1787p0, c2893p0	contig-1787, 1447	a48799r35, a3762r98		jgi|ChlNC64A_1|137805|IGS.gm_2_00272, |135272|IGS.gm_13_00200	scaffold_2, 13	CBPS_CBWC_CBWF_0_0_CBWC8043.b1, _3712_0_CBWC943.g1		jgi|Coc_C169_1|4913|gw1.1.425.1, |3754|gw1.1.327.1, |30871|estExt_Genewise1Plus.C_160313	scaffold_1, 16	1045_1_CBOZ_CBPA, 892_0_, 1811_0_CBOZ7269.g1_CBOZ_CBPA	Ot04g04970, Ot08g02190, Ot14g01920	OSTLU_31397, 33086, 43558	MICPUN_106230, 87938	MICPUCDRAFT_47963, 49600, 65271	VOLCADRAFT_102054, 43047, 73975, 81943
[KO:K00859]	2.7.1.24	dephospho-CoA kinase	CHLREDRAFT_182932		H632_c1937p0	contig-1937	a42145r109		jgi|ChlNC64A_1|19417|e_gw1.2.659.1	scaffold_2			jgi|Coc_C169_1|36296|fgenesh1_pm.6_#_144	scaffold_6	1239_1_CBOZ_CBPA	Ot16g00630	OSTLU_40654	MICPUN_56139	MICPUCDRAFT_16515	VOLCADRAFT_55149
[KO:K01431]	3.5.1.6	beta-ureidopropionase	CHLREDRAFT_157234		H632_c2271p0	contig-2271	a53826r42		jgi|ChlNC64A_1|140469|IGS.gm_3_00208	scaffold_3	CBPS_CBWC_CBWF_2086_1		jgi|Coc_C169_1|48894|estExt_fgenesh1_pg.C_190027		3916_1_CBOZ_CBPA			MICPUN_107980		VOLCADRAFT_66898
[KO:K01464]	3.5.2.2	dihydropyrimidinase	CHLREDRAFT_97227		H632_c468p1	contig-468	a55886r45		jgi|ChlNC64A_1|7764|gw1.11.57.1	scaffold_11	CBPS_CBWC_CBWF_2247_1		jgi|Coc_C169_1|2928|gw1.1.249.1	scaffold_1	2785_1_CBOZ_CBPA					VOLCADRAFT_60577
[KO:K01598]	4.1.1.36	phosphopantothenoylcysteine decarboxylase	CHLREDRAFT_155230				a150455r30		jgi|ChlNC64A_1|23730|e_gw1.11.167.1	scaffold_11			jgi|Coc_C169_1|15887|e_gw1.8.356.1	scaffold_8		Ot04g01710	OSTLU_14967	MICPUN_81042	MICPUCDRAFT_39185	VOLCADRAFT_63556
[KO:K01652]	2.2.1.6	acetolactate synthase I/II/III large subunit	CHLREDRAFT_138180		H632_c2387p1	contig-2387	a35608r83		jgi|ChlNC64A_1|55348|fgenesh3_pg.C_scaffold_34000012	scaffold_34	CBPS_CBWC_CBWF_168_1		jgi|Coc_C169_1|18006|e_gw1.13.31.1	scaffold_13		Ot14g00970, Ot16g02270	OSTLU_51596, 89681	MICPUN_63569, 88562	MICPUCDRAFT_36361, 59390	VOLCADRAFT_73117
[KO:K01653]	2.2.1.6	acetolactate synthase I/III small subunit	CHLREDRAFT_5137		H632_c209p2	contig-209	a77928r22		jgi|ChlNC64A_1|33902|estExt_Genewise1Plus.C_20477	scaffold_2	CBPS_CBWC_CBWF_1091_1		jgi|Coc_C169_1|36345|fgenesh1_pm.6_#_193	scaffold_6		Ot11g00530	OSTLU_44053	MICPUN_109233	MICPUCDRAFT_50997	VOLCADRAFT_73781
[KO:K01687]	4.2.1.9	dihydroxy-acid dehydratase	CHLREDRAFT_129639		H632_c151p1	contig-151	a7726r237		jgi|ChlNC64A_1|58991|estExt_fgenesh3_pg.C_240042	scaffold_24			jgi|Coc_C169_1|1630|gw1.2.133.1	scaffold_2		Ot03g03790	OSTLU_34354	MICPUN_90156	MICPUCDRAFT_12265	VOLCADRAFT_77661
[KO:K01918]	6.3.2.1	pantoate--beta-alanine ligase	CHLREDRAFT_97116		H632_c398p1	contig-398	a47527r58		jgi|ChlNC64A_1|133485|IGS.gm_1_00621	scaffold_1			jgi|Coc_C169_1|8261|gw1.3.479.1	scaffold_3		Ot09g02660, Ot17g02400	OSTLU_35160	MICPUN_70764	MICPUCDRAFT_15500	VOLCADRAFT_89713
[KO:K01922]	6.3.2.5	phosphopantothenate-cysteine ligase	CHLREDRAFT_116788		H632_c4923p0	contig-4923	a176317r22		jgi|ChlNC64A_1|138525|IGS.gm_21_00004	scaffold_21			jgi|Coc_C169_1|17295|e_gw1.12.311.1	scaffold_12		Ot01g00400		MICPUN_71596	MICPUCDRAFT_5184
[KO:K02201]	2.7.7.3	pantetheine-phosphate adenylyltransferase	CHLREDRAFT_117035		H632_c1400p0	contig-1400	a14782r151		jgi|ChlNC64A_1|145198|IGS.gm_9_00005	scaffold_9			jgi|Coc_C169_1|42507|fgenesh1_pg.10_#_10	scaffold_10		Ot16g01180	OSTLU_27765	MICPUN_64520	MICPUCDRAFT_11674	VOLCADRAFT_59807
[KO:K06133]	2.7.8.-	4'-phosphopantetheinyl transferase	CHLREDRAFT_142838		H632_c375p1	contig-375	a34520r174		jgi|ChlNC64A_1|141279|IGS.gm_32_00117	scaffold_32			jgi|Coc_C169_1|23036|estExt_Genewise1.C_50444	scaffold_5	3319_1_CBOZ_CBPA	Ot08g01760	OSTLU_17312, 33039	MICPUN_57916, 63247	MICPUCDRAFT_47314, 63075
[KO:K09680]	2.7.1.33	type II pantothenate kinase	CHLREDRAFT_102354		H632_c3590p0	contig-758	a66530r44		jgi|ChlNC64A_1|30367|estExt_Genewise1.C_50256	scaffold_5	CBPS_CBWC_CBWF_294_1		jgi|Coc_C169_1|52729|estExt_fgenesh1_pm.C_40004	scaffold_4	4949_0_CBOZ6759.g1_CBOZ_CBPA	Ot04g00860	OSTLU_45404	MICPUN_113383	MICPUCDRAFT_65167	VOLCADRAFT_61514
00780_Biotin_metabolism
[KO:K00059]	1.1.1.100	3-oxoacyl-[acyl-carrier protein] reductase	CHLREDRAFT_114298, 132065		H632_c4659p0, c2450p0	contig-4659, 2450	a8909r423, a12304r75		jgi|ChlNC64A_1|10140|gw1.11.128.1, |134318|IGS.gm_11_00164	scaffold_11	CBPS_CBWC_CBWF_1973_1, _2889_1		jgi|Coc_C169_1|36700|fgenesh1_pm.8_#_100, |38413|fgenesh1_pm.20_#_105	scaffold_8, 20	2916_1_, 2417_1_CBOZ_CBPA	Ot01g02200	OSTLU_12103	MICPUN_113389	MICPUCDRAFT_55323	VOLCADRAFT_60269, 79385
[KO:K00208]	1.3.1.9; 1.3.1.10	enoyl-[acyl-carrier protein] reductase I	CHLREDRAFT_122688		H632_c1571p0	contig-1571	a56545r100		jgi|ChlNC64A_1|48077|fgenesh3_kg.C_scaffold_1000013	scaffold_1	CBPS_CBWC_CBWF_51_1		jgi|Coc_C169_1|65820|estExt_Genemark1.C_60410	scaffold_6	3161_1_CBOZ_CBPA	Ot07g03740	OSTLU_32790	MICPUN_94478	MICPUCDRAFT_28287	VOLCADRAFT_83516
[KO:K00652]	2.3.1.47	8-amino-7-oxononanoate synthase	CHLREDRAFT_117112		H632_c2132p0	contig-2132	a4119r175		jgi|ChlNC64A_1|9368|gw1.9.103.1	scaffold_9			jgi|Coc_C169_1|3810|gw1.1.332.1	scaffold_1	4830_0_CBOZ561.b1_CBOZ_CBPA	Ot10g00790	OSTLU_3070	MICPUN_85005		VOLCADRAFT_78219
[KO:K00833]	2.6.1.62	adenosylmethionine-8-amino-7-oxononanoate aminotransferase	CHLREDRAFT_108892		H632_c5378p0	contig-5378	a193175r14		jgi|ChlNC64A_1|145418|IGS.gm_9_00225	scaffold_9			jgi|Coc_C169_1|55586|Genemark1.530_g	scaffold_1		Ot13g01540	OSTLU_591, 597	MICPUN_59263	MICPUCDRAFT_34980	VOLCADRAFT_40597
[KO:K01012]	2.8.1.6	biotin synthase	CHLREDRAFT_97943		H632_c1548p1	contig-1548	a334r1596		jgi|ChlNC64A_1|16892|gw1.9.369.1	scaffold_9			jgi|Coc_C169_1|39211|fgenesh1_pg.1_#_404	scaffold_1	3487_2_CBOZ_CBPA	Ot10g00580	OSTLU_46799	MICPUN_97893	MICPUCDRAFT_23693	VOLCADRAFT_102782
[KO:K01942]	6.3.4.9; 6.3.4.10; 6.3.4.11; 6.3.4.15	biotin--protein ligase	CHLREDRAFT_151096, 169728		H632_c1802p0, c2943p0	contig-1802, 2943	a243177r18, a47102r68		jgi|ChlNC64A_1|138899|IGS.gm_22_00140, |135977|IGS.gm_15_00073	scaffold_22, 15			jgi|Coc_C169_1|37674|fgenesh1_pm.14_#_108, |38819|fgenesh1_pg.1_#_12	scaffold_14, 1				MICPUN_72068	MICPUCDRAFT_6647	VOLCADRAFT_120018
[KO:K02372]	4.2.1.59	3-hydroxyacyl-[acyl-carrier-protein] dehydratase	CHLREDRAFT_102512		H632_c503p0	contig-503	a18743r170		jgi|ChlNC64A_1|34566|estExt_Genewise1Plus.C_50030	scaffold_5	CBPS_CBWC_CBWF_2700_1		jgi|Coc_C169_1|36905|fgenesh1_pm.9_#_162	scaffold_9	159_1_CBOZ_CBPA		OSTLU_12372	MICPUN_107832	MICPUCDRAFT_7220	VOLCADRAFT_74622
[KO:K09458]	2.3.1.179	3-oxoacyl-[acyl-carrier-protein] synthase II	CHLREDRAFT_114457, 139619		H632_c229p3, c506p1	contig-229, 506	a93825r41, a7094r182		jgi|ChlNC64A_1|137140|IGS.gm_18_00246, |16492|gw1.10.323.1	scaffold_18, 26	CBPS_CBWC_CBWF_1582_1, _1438_1		jgi|Coc_C169_1|3771|gw1.1.329.1, |38669|fgenesh1_pm.24_#_38	scaffold_1, 24	652_1_CBOZ_CBPA	Ot02g03940, Ot02g06880, Ot15g01520	OSTLU_13257, 29849, 35878	MICPUN_107159, 107432, 62746	MICPUCDRAFT_3199, 49639, 59921	VOLCADRAFT_101657, 104947, 83790
00785_Lipoic_acid_metabolism
[KO:K03644]	2.8.1.8	lipoic acid synthetase	CHLREDRAFT_194766, 196092		H632_c740p1, c646p1	contig-740, 646	a23841r137		jgi|ChlNC64A_1|9799|gw1.12.175.1, |51936|fgenesh3_pg.C_scaffold_8000223	scaffold_12, 8			jgi|Coc_C169_1|11727|e_gw1.1.526.1, |58481|Genemark1.7510_g	scaffold_1, 18	2399_1_CBOZ_CBPA		OSTLU_31232, 32294	MICPUN_60627, 86513	MICPUCDRAFT_20781, 4033	VOLCADRAFT_43591
[KO:K03801]	2.3.1.181	lipoyl(octanoyl) transferase	CHLREDRAFT_195940, 50452		H632_c204p1	contig-204, 5569	a174525r33, a96481r51		jgi|ChlNC64A_1|134247|IGS.gm_11_00093, |12548|gw1.7.155.1	scaffold_11, 7			jgi|Coc_C169_1|7094|gw1.1.623.1, |9028|gw1.10.468.1	scaffold_1, 10		Ot01g04560, Ot05g03120	OSTLU_38676, 7617	MICPUN_109040, 58131	MICPUCDRAFT_46710, 70185	VOLCADRAFT_59336, 65732
00790_Folate_biosynthesis
[KO:K01113]	3.1.3.1	alkaline phosphatase D	CHLREDRAFT_142797, 196515		H632_c4454p0	contig-3693	a19398r112		jgi|ChlNC64A_1|137864|IGS.gm_2_00331, |137467|IGS.gm_19_00234	scaffold_2	CBPS_CBWC_CBWF_3441_0_CBWC4254.b1					Ot10g02060	OSTLU_26163	MICPUN_59858, 60561	MICPUCDRAFT_55889
[KO:K01307]	3.4.19.9	gamma-glutamyl hydrolase	CHLREDRAFT_187002		H632_c1088p1	contig-1088	a9480r274		jgi|ChlNC64A_1|133025|IGS.gm_1_00161	scaffold_1			jgi|Coc_C169_1|26898|estExt_Genewise1Plus.C_10719	scaffold_13	2577_1_CBOZ_CBPA			MICPUN_76094		VOLCADRAFT_102798
[KO:K01633]	4.1.2.25	dihydroneopterin aldolase	CHLREDRAFT_155610		H632_c2384p1	contig-2384	a21513r136		jgi|ChlNC64A_1|14659|gw1.3.536.1	scaffold_3			jgi|Coc_C169_1|57423|Genemark1.6452_g	scaffold_14		Ot09g02710	OSTLU_33546		MICPUCDRAFT_9009
[KO:K03635]	2.-.-.-	molybdopterin synthase catalytic subunit	CHLREDRAFT_109356, 98436			contig-237, 96	a29619r187, a23685r137		jgi|ChlNC64A_1|142748|IGS.gm_5_00077, |135194|IGS.gm_13_00122	scaffold_13	CBPS_CBWC_CBWF_420_1		jgi|Coc_C169_1|12278|e_gw1.2.728.1, |38113|fgenesh1_pm.18_#_66	scaffold_2, 18		Ot17g00250	OSTLU_37690, 94198	MICPUN_64811, 85418	MICPUCDRAFT_53761	VOLCADRAFT_61348, 82067
[KO:K03639]	---	molybdenum cofactor biosynthesis protein	CHLREDRAFT_106419, 175536		H632_c310p3, c341p2	contig-310, 341	a60219r58, a38183r88		jgi|ChlNC64A_1|10320|gw1.18.152.1, |138003|IGS.gm_2_00470	scaffold_18, 2			jgi|Coc_C169_1|43275|fgenesh1_pg.12_#_214, |7917|gw1.11.255.1	scaffold_12, 11	2021_1_CBOZ_CBPA	Ot02g07740, Ot10g00990	OSTLU_119780, 50634	MICPUN_113905, 83859	MICPUCDRAFT_50687, 70905	VOLCADRAFT_57519, 61540
[KO:K13950]	2.6.1.85	para-aminobenzoate synthetase	CHLREDRAFT_123116		H632_c1765p0	contig-1765	a54755r55		jgi|ChlNC64A_1|143188|IGS.gm_5_00517	scaffold_5	CBPS_CBWC_CBWF_3620_0_CBWC6996.b1		jgi|Coc_C169_1|37711|fgenesh1_pm.14_#_145	scaffold_14		Ot18g01020	OSTLU_42151	MICPUN_79586	MICPUCDRAFT_23429	VOLCADRAFT_56121
[KO:K13998]	1.5.1.3; 2.1.1.45	dihydrofolate reductase / thymidylate synthase	CHLREDRAFT_139742		H632_c2296p0	contig-2296	a22198r112		jgi|ChlNC64A_1|48756|fgenesh3_pm.C_scaffold_8000027	scaffold_8	CBPS_CBWC_CBWF_632_1		jgi|Coc_C169_1|37014|fgenesh1_pm.10_#_102	scaffold_10		Ot01g05780	OSTLU_49676	MICPUN_58650	MICPUCDRAFT_56456	VOLCADRAFT_66296
00860_Porphyrin_and_chlorophyll_metabolism
[KO:K00218]	1.3.1.33	protochlorophyllide reductase	CHLREDRAFT_136589		H632_c1p7				jgi|ChlNC64A_1|139763|IGS.gm_26_00116	scaffold_26	CBPS_CBWC_CBWF_2279_1		jgi|Coc_C169_1|62325|Genemark1.3108_g	scaffold_5	3244_1_CBOZ_CBPA	Ot07g01640	OSTLU_4180, 4520	MICPUN_93411		VOLCADRAFT_81013
[KO:K00228]	1.3.3.3	coproporphyrinogen III oxidase	CHLREDRAFT_205686, 53583		H632_c1085p0	contig-1085	a15281r284		jgi|ChlNC64A_1|53914|fgenesh3_pg.C_scaffold_18000104, |142838|IGS.gm_5_00167	scaffold_18, 5	CBPS_CBWC_CBWF_1759_1		jgi|Coc_C169_1|5704|gw1.12.254.1, |58421|Genemark1.7450_g	scaffold_12, 18		Ot03g03170	OSTLU_30642, 4238	MICPUN_104790, 80311	MICPUCDRAFT_23563, 52031	VOLCADRAFT_103455, 55865
[KO:K00231]	1.3.3.4	oxygen-dependent protoporphyrinogen oxidase	CHLREDRAFT_191043		H632_c475p1	contig-475	a25467r57		jgi|ChlNC64A_1|51538|fgenesh3_pg.C_scaffold_7000085	scaffold_7	CBPS_CBWC_CBWF_2748_1		jgi|Coc_C169_1|54181|estExt_fgenesh1_pm.C_130128	scaffold_13	1304_1_CBOZ_CBPA	Ot06g03600	OSTLU_32279	MICPUN_60613	MICPUCDRAFT_35610	VOLCADRAFT_83109
[KO:K00510]	1.14.99.3	heme oxygenase	CHLREDRAFT_152591						jgi|ChlNC64A_1|133545|IGS.gm_1_00681	scaffold_1			jgi|Coc_C169_1|62659|Genemark1.3442_g	scaffold_6		Ot18g01720	OSTLU_89558	MICPUN_108005	MICPUCDRAFT_46050	VOLCADRAFT_117870, 92469
[KO:K00522]	1.16.3.1	ferritin heavy chain	CHLREDRAFT_206372		H632_c1404p0	contig-1404	a4568r584		jgi|ChlNC64A_1|53618|fgenesh3_pg.C_scaffold_16000130	scaffold_16	CBPS_CBWC_CBWF_2496_1		jgi|Coc_C169_1|57878|Genemark1.6907_g	scaffold_16	167_1_CBOZ_CBPA	Ot02g05790	OSTLU_6922, 7252	MICPUN_96750	MICPUCDRAFT_49734	VOLCADRAFT_81290
[KO:K00798]	2.5.1.17	cob(I)alamin adenosyltransferase	CHLREDRAFT_122771			contig-1363	a31919r104		jgi|ChlNC64A_1|49309|fgenesh3_pg.C_scaffold_1000007	scaffold_1							OSTLU_43645	MICPUN_103853	MICPUCDRAFT_22951	VOLCADRAFT_94577
[KO:K01599]	4.1.1.37	uroporphyrinogen decarboxylase	CHLREDRAFT_132194, 186446		H632_c491p1, c328p0	contig-491, 328	a43184r57		jgi|ChlNC64A_1|56289|estExt_fgenesh3_pm.C_190004, |48236|fgenesh3_kg.C_scaffold_12000007	scaffold_12	CBPS_CBWC_CBWF_2198_1, _1656_1		jgi|Coc_C169_1|42312|fgenesh1_pg.9_#_98, |4697|gw1.1.401.1	scaffold_9, 1		Ot05g01080, Ot12g02500, Ot17g00180	OSTLU_17656, 18446, 31578	MICPUN_104963, 54920, 96206	MICPUCDRAFT_23171, 49908, 64427	VOLCADRAFT_74033, 83541
[KO:K01698]	4.2.1.24	porphobilinogen synthase	CHLREDRAFT_186639		H632_c3133p0	contig-3133	a72201r23		jgi|ChlNC64A_1|137125|IGS.gm_18_00231	scaffold_18	CBPS_CBWC_CBWF_1417_0_CBWF3357.g1		jgi|Coc_C169_1|19572|e_gw1.19.137.1	scaffold_19	3526_1_CBOZ_CBPA	Ot01g02360	OSTLU_28845	MICPUN_93011	MICPUCDRAFT_45299	VOLCADRAFT_72683
[KO:K01719]	4.2.1.75	uroporphyrinogen-III synthase	CHLREDRAFT_195943		H632_c49p1		a96574r36		jgi|ChlNC64A_1|51477|fgenesh3_pg.C_scaffold_7000024	scaffold_7	CBPS_CBWC_CBWF_0_0_CBPS1552.b1		jgi|Coc_C169_1|54156|estExt_fgenesh1_pm.C_130096	scaffold_13	4973_0_CBOZ7018.g1_CBOZ_CBPA		OSTLU_5668	MICPUN_60121	MICPUCDRAFT_50233	VOLCADRAFT_69473
[KO:K01749]	2.5.1.61	hydroxymethylbilane synthase	CHLREDRAFT_194475		H632_c248p0	contig-248	a193813r22		jgi|ChlNC64A_1|48354|fgenesh3_kg.C_scaffold_29000005	scaffold_29	CBPS_CBWC_CBWF_2552_1		jgi|Coc_C169_1|35981|fgenesh1_pm.5_#_80	scaffold_5	4890_0_CBOZ6172.b1_CBOZ_CBPA	Ot05g01220	OSTLU_31592	MICPUN_78011	MICPUCDRAFT_31842	VOLCADRAFT_85406
[KO:K01764]	4.4.1.17	cytochrome c heme-lyase	CHLREDRAFT_121344, 184910, 192603		H632_c3715p0, c2771p0	contig-3715, 2771	a53421r82		jgi|ChlNC64A_1|12559|gw1.24.187.1, |35847|estExt_Genewise1Plus.C_120470, |24298|e_gw1.12.590.1	scaffold_24, 12	CBPS_CBWC_CBWF_3095_1		jgi|Coc_C169_1|42396|fgenesh1_pg.9_#_182, |16272|e_gw1.9.279.1, |6691|gw1.9.283.1	scaffold_9		Ot17g01080, Ot17g01570	OSTLU_10461, 13359	MICPUN_76259, 76264	MICPUCDRAFT_5948, 6472	VOLCADRAFT_105944, 75232
[KO:K01772]	4.99.1.1	ferrochelatase	CHLREDRAFT_183446		H632_c1089p2	contig-1089	a17268r205		jgi|ChlNC64A_1|24443|e_gw1.13.26.1	scaffold_13	CBPS_CBWC_CBWF_2083_1		jgi|Coc_C169_1|37848|fgenesh1_pm.16_#_13	scaffold_16		Ot11g02860	OSTLU_2831	MICPUN_96687		VOLCADRAFT_109142
[KO:K01845]	5.4.3.8	glutamate-1-semialdehyde 2,1-aminomutase	CHLREDRAFT_138524		H632_c3631p0	contig-3631	a3766r248		jgi|ChlNC64A_1|37143|estExt_Genewise1Plus.C_260010	scaffold_26	CBPS_CBWC_CBWF_116_1		jgi|Coc_C169_1|37263|fgenesh1_pm.12_#_6	scaffold_12	1090_0_CBOZ5286.b1_CBOZ_CBPA	Ot20g00090	OSTLU_28523	MICPUN_61667	MICPUCDRAFT_29561	VOLCADRAFT_74470
[KO:K01885]	6.1.1.17	glutamyl-tRNA synthetase	CHLREDRAFT_195543, 195574		H632_c1465p0, c902p0	contig-1465, 902	a7329r255, a119178r26		jgi|ChlNC64A_1|26204|e_gw1.19.10.1, |35806|estExt_Genewise1Plus.C_120366	scaffold_19, 12	CBPS_CBWC_CBWF_382_1, _668_1		jgi|Coc_C169_1|852|gw1.9.47.1, |2624|gw1.2.222.1	scaffold_4, 2	2802_0_CBOZ1290.b1_CBOZ_CBPA	Ot01g04070, Ot01g04250	OSTLU_39738, 49888	MICPUN_93354	MICPUCDRAFT_21054, 64448	VOLCADRAFT_106276, 77768
[KO:K02257]	2.5.1.-	protoheme IX farnesyltransferase	CHLREDRAFT_123320		H632_c249p2	contig-249	a17371r108		jgi|ChlNC64A_1|16826|gw1.11.387.1	scaffold_11			jgi|Coc_C169_1|4154|gw1.4.360.1	scaffold_4	2612_1_CBOZ_CBPA	Ot04g05160	OSTLU_87130	MICPUN_68841	MICPUCDRAFT_34718	VOLCADRAFT_79954
[KO:K02259]	---	cytochrome c oxidase assembly protein subunit 15	CHLREDRAFT_111563		H632_c70p2	contig-70	a39680r53		jgi|ChlNC64A_1|23720|e_gw1.11.94.1	scaffold_11			jgi|Coc_C169_1|5799|gw1.1.500.1	scaffold_1		Ot14g02350	OSTLU_43606	MICPUN_80958	MICPUCDRAFT_3013
[KO:K02492]	1.2.1.70	glutamyl-tRNA reductase	CHLREDRAFT_183460		H632_c3242p0	contig-3242	a44115r88		jgi|ChlNC64A_1|7817|gw1.1.117.1	scaffold_1	CBPS_CBWC_CBWF_192_2		jgi|Coc_C169_1|2822|gw1.6.126.1	scaffold_6		Ot11g00720	OSTLU_26395	MICPUN_62986	MICPUCDRAFT_48234	VOLCADRAFT_81610
[KO:K02495]	1.3.99.22	oxygen-independent coproporphyrinogen III oxidase	CHLREDRAFT_99520		H632_c1984p0	contig-1984	a6921r126		jgi|ChlNC64A_1|9182|gw1.22.58.1	scaffold_22			jgi|Coc_C169_1|36095|fgenesh1_pm.5_#_194	scaffold_5		Ot01g01180	OSTLU_10143	MICPUN_93264	MICPUCDRAFT_14012	VOLCADRAFT_42214
[KO:K03403]	6.6.1.1	magnesium chelatase subunit H	CHLREDRAFT_105632, 195524						jgi|ChlNC64A_1|135471|IGS.gm_14_00004, |31675|estExt_Genewise1.C_140003	scaffold_14, 6	CBPS_CBWC_CBWF_214_1, _364_2		jgi|Coc_C169_1|89|gw1.3.10.1, |14114|e_gw1.5.13.1	scaffold_3, 5		Ot04g02230, Ot05g01030	OSTLU_45384, 49527	MICPUN_104801, 58266	MICPUCDRAFT_16188, 26233	VOLCADRAFT_76537
[KO:K03404]	6.6.1.1	magnesium chelatase subunit D	CHLREDRAFT_134594						jgi|ChlNC64A_1|21277|e_gw1.5.296.1	scaffold_178	CBPS_CBWC_CBWF_706_1		jgi|Coc_C169_1|18559|e_gw1.15.29.1	scaffold_15	1224_1_CBOZ_CBPA	Ot05g05120, Ot15g01280	OSTLU_38488, 776	MICPUN_62064	MICPUCDRAFT_18092	VOLCADRAFT_107092, 121490
[KO:K03428]	2.1.1.11	magnesium-protoporphyrin O-methyltransferase	CHLREDRAFT_195575						jgi|ChlNC64A_1|27618|e_gw1.26.149.1	scaffold_26	CBPS_CBWC_CBWF_2333_1		jgi|Coc_C169_1|5281|gw1.24.44.1	scaffold_24		Ot07g02420	OSTLU_35500	MICPUN_96236	MICPUCDRAFT_57377
[KO:K04035]	1.14.13.81	magnesium-protoporphyrin IX monomethyl ester (oxidative) cyclase	CHLREDRAFT_205856						jgi|ChlNC64A_1|56120|estExt_fgenesh3_pm.C_80002	scaffold_8	CBPS_CBWC_CBWF_722_1		jgi|Coc_C169_1|40292|fgenesh1_pg.3_#_353	scaffold_3	2986_0_CBOZ4924.b1_CBOZ_CBPA	Ot15g02810	OSTLU_47501	MICPUN_107081	MICPUCDRAFT_49742	VOLCADRAFT_80084, 81575
[KO:K04040]	2.5.1.62	chlorophyll synthase	CHLREDRAFT_5437						jgi|ChlNC64A_1|30550|estExt_Genewise1.C_60119	scaffold_6	CBPS_CBWC_CBWF_2362_1		jgi|Coc_C169_1|52587|estExt_fgenesh1_pm.C_30088	scaffold_3	0_0_CBOZ7729.b1_CBOZ_CBPA		OSTLU_16384	MICPUN_59614	MICPUCDRAFT_33362	VOLCADRAFT_80530
[KO:K10960]	1.3.1.83	geranylgeranyl reductase	CHLREDRAFT_136810						jgi|ChlNC64A_1|56695|estExt_fgenesh3_pg.C_20119	scaffold_2	CBPS_CBWC_CBWF_888_2		jgi|Coc_C169_1|20972|e_gw1.26.21.1	scaffold_26	4468_0_CBOZ1697.b1_CBOZ_CBPA	Ot02g04630	OSTLU_119498	MICPUN_91628	MICPUCDRAFT_49640	VOLCADRAFT_77841
[KO:K13600]	1.14.13.122	chlorophyllide a oxygenase	CHLREDRAFT_195951						jgi|ChlNC64A_1|54799|fgenesh3_pg.C_scaffold_25000074	scaffold_25	CBPS_CBWC_CBWF_3200_1		jgi|Coc_C169_1|44130|fgenesh1_pg.16_#_109	scaffold_16	2946_1_CBOZ_CBPA	Ot12g01450	OSTLU_5015	MICPUN_104843	MICPUCDRAFT_60555	VOLCADRAFT_64158
[KO:K13606]	1.1.1.294	chlorophyll(ide) b reductase	CHLREDRAFT_205572		H632_c3494p0	contig-2785	a12114r131		jgi|ChlNC64A_1|145263|IGS.gm_9_00070	scaffold_9	CBPS_CBWC_CBWF_2098_1		jgi|Coc_C169_1|55667|Genemark1.611_g	scaffold_1	4814_0_CBOZ5517.b1_CBOZ_CBPA	Ot01g02900	OSTLU_39837	MICPUN_85939	MICPUCDRAFT_5073	VOLCADRAFT_103703, 67034
00900_Terpenoid_backbone_biosynthesis
[KO:K00099]	1.1.1.267	1-deoxy-D-xylulose-5-phosphate reductoisomerase	CHLREDRAFT_196606		H632_c2439p1	contig-2439	a39926r129		jgi|ChlNC64A_1|8532|gw1.3.157.1	scaffold_3	CBPS_CBWC_CBWF_3632_0_CBWC7129.g1		jgi|Coc_C169_1|63252|Genemark1.4035_g	scaffold_7	2343_1_CBOZ_CBPA	Ot04g03460		MICPUN_108708	MICPUCDRAFT_47613	VOLCADRAFT_82431
[KO:K00587]	2.1.1.100	protein-S-isoprenylcysteine O-methyltransferase	CHLREDRAFT_146308			contig-423	a190347r26			scaffold_3			jgi|Coc_C169_1|32208|fgenesh1_kg.2_#_93_#_0_0_CBPA406.b1_CBOZ_CBPA	scaffold_2	0_0_CBPA406.b1_CBOZ_CBPA	Ot02g06040	OSTLU_86391	MICPUN_58408	MICPUCDRAFT_15590	VOLCADRAFT_77213
[KO:K00626]	2.3.1.9	acetyl-CoA C-acetyltransferase	CHLREDRAFT_118204		H632_c3387p0	contig-3387	a991r574		jgi|ChlNC64A_1|56332|estExt_fgenesh3_pm.C_240017	scaffold_24	CBPS_CBWC_CBWF_2185_1		jgi|Coc_C169_1|4417|gw1.11.146.1	scaffold_11	149_1_CBOZ_CBPA					VOLCADRAFT_75176, 84837
[KO:K00787]	2.5.1.1; 2.5.1.10	farnesyl diphosphate synthase	CHLREDRAFT_137019		H632_c38p1	contig-38	a10326r311		jgi|ChlNC64A_1|133229|IGS.gm_1_00365	scaffold_1	CBPS_CBWC_CBWF_1152_1		jgi|Coc_C169_1|14497|e_gw1.5.330.1	scaffold_5	540_1_CBOZ_CBPA	Ot03g02400	OSTLU_34113	MICPUN_104792	MICPUCDRAFT_44821	VOLCADRAFT_98778
[KO:K00919]	2.7.1.148	4-diphosphocytidyl-2-C-methyl-D-erythritol kinase	CHLREDRAFT_137673		H632_c1632p1	contig-1632	a25746r123		jgi|ChlNC64A_1|29148|estExt_Genewise1.C_10065	scaffold_1	CBPS_CBWC_CBWF_0_0_CBWF1979.b1		jgi|Coc_C169_1|35952|fgenesh1_pm.5_#_51	scaffold_5		Ot16g02030		MICPUN_109549	MICPUCDRAFT_53244
[KO:K00991]	2.7.7.60	2-C-methyl-D-erythritol 4-phosphate cytidylyltransferase	CHLREDRAFT_196604			contig-10	a43556r80		jgi|ChlNC64A_1|141910|IGS.gm_4_00051	scaffold_4	CBPS_CBWC_CBWF_0_0_CBWC2335.g1		jgi|Coc_C169_1|6249|gw1.4.569.1	scaffold_4				MICPUN_83560	MICPUCDRAFT_37930	VOLCADRAFT_84386
[KO:K01641]	2.3.3.10	hydroxymethylglutaryl-CoA synthase	CHLREDRAFT_118594		H632_c1131p0	contig-1131	a28319r197		jgi|ChlNC64A_1|50079|fgenesh3_pg.C_scaffold_2000324	scaffold_2			jgi|Coc_C169_1|27384|estExt_Genewise1Plus.C_30063	scaffold_3	3188_1_CBOZ_CBPA					VOLCADRAFT_59473
[KO:K01662]	2.2.1.7	1-deoxy-D-xylulose-5-phosphate synthase	CHLREDRAFT_196568		H632_c3030p0	contig-3030	a21285r132		jgi|ChlNC64A_1|48332|fgenesh3_kg.C_scaffold_26000009	scaffold_26	CBPS_CBWC_CBWF_16_1		jgi|Coc_C169_1|16573|e_gw1.10.54.1	scaffold_10	3095_1_CBOZ_CBPA	Ot02g03880	OSTLU_48774	MICPUN_107366	MICPUCDRAFT_24848	VOLCADRAFT_107482
[KO:K01770]	4.6.1.12	2-C-methyl-D-erythritol 2,4-cyclodiphosphate synthase	CHLREDRAFT_188593		H632_c2131p1	contig-2131	a21936r82		jgi|ChlNC64A_1|12158|gw1.15.167.1	scaffold_15			jgi|Coc_C169_1|54295|estExt_fgenesh1_pm.C_140146	scaffold_14	3245_1_CBOZ_CBPA	Ot11g00050		MICPUN_113519	MICPUCDRAFT_28562	VOLCADRAFT_88137
[KO:K01823]	5.3.3.2	isopentenyl-diphosphate delta-isomerase	CHLREDRAFT_24471		H632_c1231p0	contig-1231	a35095r132		jgi|ChlNC64A_1|53578|fgenesh3_pg.C_scaffold_16000090	scaffold_16			jgi|Coc_C169_1|16282|e_gw1.9.288.1	scaffold_9			OSTLU_13493	MICPUN_54661	MICPUCDRAFT_22570	VOLCADRAFT_84296
[KO:K03526]	1.17.7.1	(E)-4-hydroxy-3-methylbut-2-enyl-diphosphate synthase	CHLREDRAFT_55268		H632_c4345p0	contig-4345	a39600r63		jgi|ChlNC64A_1|144676|IGS.gm_8_00004	scaffold_8	CBPS_CBWC_CBWF_838_1		jgi|Coc_C169_1|22038|estExt_Genewise1.C_30042	scaffold_3	2723_1_CBOZ_CBPA	Ot09g00990		MICPUN_95921	MICPUCDRAFT_45326	VOLCADRAFT_63610
[KO:K03527]	1.17.1.2	4-hydroxy-3-methylbut-2-enyl diphosphate reductase	CHLREDRAFT_59822		H632_c2p4	contig-2	a7361r543		jgi|ChlNC64A_1|48202|fgenesh3_kg.C_scaffold_8000007	scaffold_8	CBPS_CBWC_CBWF_229_1		jgi|Coc_C169_1|37074|fgenesh1_pm.10_#_162	scaffold_10	0_0_CBPA3172.b1_CBOZ_CBPA	Ot08g01140		MICPUN_97588	MICPUCDRAFT_26764	VOLCADRAFT_79586
[KO:K05356]	2.5.1.84; 2.5.1.85	all-trans-nonaprenyl-diphosphate synthase	CHLREDRAFT_182663		H632_c2792p0	contig-2792	a11449r155		jgi|ChlNC64A_1|27410|e_gw1.25.50.1	scaffold_25	CBPS_CBWC_CBWF_1535_1		jgi|Coc_C169_1|36590|fgenesh1_pm.7_#_206	scaffold_7	1253_1_CBOZ_CBPA	Ot17g01520	OSTLU_51700	MICPUN_58850	MICPUCDRAFT_23095	VOLCADRAFT_57046
[KO:K05954]	2.5.1.58	protein farnesyltransferase subunit beta	CHLREDRAFT_193447		H632_c1279p1	contig-4998	a100915r42		jgi|ChlNC64A_1|37638|estExt_Genewise1Plus.C_370038	scaffold_37	CBPS_CBWC_CBWF_1422_1		jgi|Coc_C169_1|3084|gw1.12.118.1	scaffold_12	3977_1_CBOZ_CBPA	Ot02g05950	OSTLU_86397	MICPUN_81968	MICPUCDRAFT_2945	VOLCADRAFT_85812
[KO:K05955]	2.5.1.58; 2.5.1.59	protein farnesyltransferase/geranylgeranyltransferase type-1 subunit alpha	CHLREDRAFT_189746		H632_c235p1	contig-235	a42352r62		jgi|ChlNC64A_1|37078|estExt_Genewise1Plus.C_250016	scaffold_25	CBPS_CBWC_CBWF_2781_1		jgi|Coc_C169_1|47873|estExt_fgenesh1_pg.C_100224	scaffold_10	0_0_CBOZ737.b1_CBOZ_CBPA			MICPUN_70506	MICPUCDRAFT_23673	VOLCADRAFT_107343
[KO:K08658]	3.4.22.-	prenyl protein peptidase	CHLREDRAFT_190033			contig-1072	a28343r114		jgi|ChlNC64A_1|139494|IGS.gm_25_00045	scaffold_25			jgi|Coc_C169_1|14314|e_gw1.5.396.1	scaffold_5		Ot09g02490	OSTLU_16795	MICPUN_76762	MICPUCDRAFT_38670	VOLCADRAFT_32069
[KO:K10960]	1.3.1.83	geranylgeranyl reductase	CHLREDRAFT_136810						jgi|ChlNC64A_1|56695|estExt_fgenesh3_pg.C_20119	scaffold_2	CBPS_CBWC_CBWF_888_2		jgi|Coc_C169_1|20972|e_gw1.26.21.1	scaffold_26	4468_0_CBOZ1697.b1_CBOZ_CBPA	Ot02g04630	OSTLU_119498	MICPUN_91628	MICPUCDRAFT_49640	VOLCADRAFT_77841
[KO:K11778]	2.5.1.87	ditrans,polycis-polyprenyl diphosphate synthase	CHLREDRAFT_112385		H632_c145p2	contig-145	a20690r210		jgi|ChlNC64A_1|11939|gw1.9.195.1	scaffold_9	CBPS_CBWC_CBWF_0_0_CBWF5987.g1		jgi|Coc_C169_1|7738|gw1.1.666.1	scaffold_1		Ot16g02750	OSTLU_40498	MICPUN_70424	MICPUCDRAFT_5590	VOLCADRAFT_55634
[KO:K13789]	2.5.1.1; 2.5.1.10; 2.5.1.29	geranylgeranyl diphosphate synthase, type II	CHLREDRAFT_195038		H632_c2792p0	contig-2792	a30048r70		jgi|ChlNC64A_1|9230|gw1.15.70.1	scaffold_15	CBPS_CBWC_CBWF_1535_1		jgi|Coc_C169_1|61194|Genemark1.2005_g	scaffold_3	1253_1_CBOZ_CBPA	Ot12g01350	OSTLU_17563	MICPUN_104883	MICPUCDRAFT_50196	VOLCADRAFT_109214
[KO:K14066]	2.5.1.1	geranyl diphosphate synthase	CHLREDRAFT_135421		H632_c2792p0	contig-2792	a11449r155		jgi|ChlNC64A_1|25393|e_gw1.15.64.1	scaffold_15	CBPS_CBWC_CBWF_1535_1		jgi|Coc_C169_1|11182|e_gw1.1.348.1	scaffold_1	4789_0_CBOZ5277.b1_CBOZ_CBPA	Ot04g03330	OSTLU_31245	MICPUN_98082	MICPUCDRAFT_44557	VOLCADRAFT_88541
[KO:K15889]	3.1.1.-	prenylcysteine alpha-carboxyl methylesterase	CHLREDRAFT_108256		H632_c111p0	contig-111	a112351r43		jgi|ChlNC64A_1|144725|IGS.gm_8_00053	scaffold_8	CBPS_CBWC_CBWF_2196_1		jgi|Coc_C169_1|4495|gw1.24.36.1	scaffold_24	4425_0_CBOZ1268.g1_CBOZ_CBPA	Ot10g00030	OSTLU_25096	MICPUN_106062	MICPUCDRAFT_23717	VOLCADRAFT_66123
00906_Carotenoid_biosynthesis
[KO:K00514]	1.3.5.6	zeta-carotene desaturase	CHLREDRAFT_182457						jgi|ChlNC64A_1|141585|IGS.gm_36_00005	scaffold_36	CBPS_CBWC_CBWF_8_19		jgi|Coc_C169_1|13033|e_gw1.3.132.1	scaffold_3						VOLCADRAFT_95071
[KO:K02291]	2.5.1.32	phytoene synthase	CHLREDRAFT_59715						jgi|ChlNC64A_1|9591|gw1.26.122.1	scaffold_26			jgi|Coc_C169_1|11510|e_gw1.1.354.1	scaffold_1	1733_0_CBOZ3227.b1_CBOZ_CBPA	Ot05g03630, Ot13g03200	OSTLU_12559, 5449	MICPUN_85839	MICPUCDRAFT_32317	VOLCADRAFT_97827
[KO:K02293]	1.3.5.5	15-cis-phytoene desaturase	CHLREDRAFT_78128						jgi|ChlNC64A_1|34421|estExt_Genewise1Plus.C_40313	scaffold_4	CBPS_CBWC_CBWF_8_19		jgi|Coc_C169_1|36813|fgenesh1_pm.9_#_70	scaffold_9		Ot10g02960	OSTLU_38345, 47627	MICPUN_104873, 96647	MICPUCDRAFT_12341, 49039	VOLCADRAFT_88495
[KO:K06444]	5.5.1.18	lycopene epsilon-cyclase	CHLREDRAFT_187094						jgi|ChlNC64A_1|29936|estExt_Genewise1.C_30668	scaffold_3	CBPS_CBWC_CBWF_3267_0_CBWC1636.g1		jgi|Coc_C169_1|41900|fgenesh1_pg.7_#_304	scaffold_7			OSTLU_43511			VOLCADRAFT_54924
[KO:K09838]	1.14.13.90	zeaxanthin epoxidase	CHLREDRAFT_53522						jgi|ChlNC64A_1|6937|gw1.21.17.1	scaffold_21	CBPS_CBWC_CBWF_697_1		jgi|Coc_C169_1|56203|Genemark1.5232_g	scaffold_11	5098_0_CBOZ8295.b1_CBOZ_CBPA	Ot02g04620, Ot16g00660	OSTLU_1611	MICPUN_50838, 82567	MICPUCDRAFT_19991, 24859	VOLCADRAFT_75879
[KO:K15746]	1.14.13.129	beta-carotene 3-hydroxylase	CHLREDRAFT_164400						jgi|ChlNC64A_1|52994|fgenesh3_pg.C_scaffold_13000100	scaffold_13	CBPS_CBWC_CBWF_3628_0_CBWC7064.b1		jgi|Coc_C169_1|18947|e_gw1.16.235.1	scaffold_16	4728_0_CBOZ4741.g1_CBOZ_CBPA	Ot10g01980	OSTLU_9013	MICPUN_76186		VOLCADRAFT_68369
[KO:K15747]	1.14.-.-	beta-ring hydroxylase	CHLREDRAFT_196742		H632_c145p0	contig-145	a15090r196		jgi|ChlNC64A_1|51247|fgenesh3_pg.C_scaffold_6000061	scaffold_1	CBPS_CBWC_CBWF_1502_1		jgi|Coc_C169_1|986|gw1.1.106.1	scaffold_1	3046_1_CBOZ_CBPA	Ot13g02550	OSTLU_1824, 47300	MICPUN_59502	MICPUCDRAFT_57916	VOLCADRAFT_100143
00909_Sesquiterpenoid_and_triterpenoid_biosynthesis
[KO:K00801]	2.5.1.21	farnesyl-diphosphate farnesyltransferase	CHLREDRAFT_99438		H632_c1268p0	contig-1268	a79010r51		jgi|ChlNC64A_1|11287|gw1.1.350.1	scaffold_1	CBPS_CBWC_CBWF_2526_1		jgi|Coc_C169_1|35284|fgenesh1_pm.2_#_294	scaffold_2		Ot04g02220	OSTLU_31144	MICPUN_108133	MICPUCDRAFT_57124	VOLCADRAFT_79344
00910_Nitrogen_metabolism
[KO:K00261]	1.4.1.3	glutamate dehydrogenase (NAD(P)+)	CHLREDRAFT_82916		H632_c370p0	contig-370	a3972r613		jgi|ChlNC64A_1|48227|fgenesh3_kg.C_scaffold_11000011	scaffold_4	CBPS_CBWC_CBWF_358_1		jgi|Coc_C169_1|36676|fgenesh1_pm.8_#_76	scaffold_8	3695_1_CBOZ_CBPA					VOLCADRAFT_63307
[KO:K00264]	1.4.1.13; 1.4.1.14	glutamate synthase (NADPH/NADH)	CHLREDRAFT_205746		H632_c5592p0	contig-4979	a158406r24		jgi|ChlNC64A_1|18677|e_gw1.1.6.1	scaffold_1	CBPS_CBWC_CBWF_1302_2		jgi|Coc_C169_1|36225|fgenesh1_pm.6_#_73	scaffold_6	2272_1_CBOZ_CBPA			MICPUN_105473	MICPUCDRAFT_57115	VOLCADRAFT_108038
[KO:K00284]	1.4.7.1	glutamate synthase (ferredoxin)	CHLREDRAFT_140487		H632_c5592p0	contig-5592	a158406r24		jgi|ChlNC64A_1|33620|estExt_Genewise1Plus.C_10525	scaffold_709	CBPS_CBWC_CBWF_29_1		jgi|Coc_C169_1|13331|e_gw1.4.7.1	scaffold_4	2272_1_CBOZ_CBPA	Ot14g02240	OSTLU_51965	MICPUN_63658	MICPUCDRAFT_70244	VOLCADRAFT_127156
[KO:K00366]	1.7.7.1	ferredoxin-nitrite reductase	CHLREDRAFT_192085		H632_c96p0	contig-96	a13491r137		jgi|ChlNC64A_1|7126|gw1.21.24.1	scaffold_21	CBPS_CBWC_CBWF_420_1		jgi|Coc_C169_1|53877|estExt_fgenesh1_pm.C_110052	scaffold_11	1670_1_CBOZ_CBPA	Ot10g00930	OSTLU_50765	MICPUN_113259	MICPUCDRAFT_70828	VOLCADRAFT_83067
[KO:K00411]	1.10.2.2	ubiquinol-cytochrome c reductase iron-sulfur subunit	CHLREDRAFT_109194, 129128		H632_c39p1	contig-39	a10004r399		jgi|ChlNC64A_1|32676|estExt_Genewise1.C_240144	scaffold_24	CBPS_CBWC_CBWF_0_0_CBWF2799.b1		jgi|Coc_C169_1|59110|Genemark1.1072_g, 35150|fgenesh1_pm.2_#_160	scaffold_2	1286_1_CBOZ_CBPA	Ot13g03160	OSTLU_36665, 41673	MICPUN_94567	MICPUCDRAFT_37463	VOLCADRAFT_77835
[KO:K00413]	---	ubiquinol-cytochrome c reductase cytochrome c1 subunit	CHLREDRAFT_133395		H632_c3216p0	contig-3216	a3978r544		jgi|ChlNC64A_1|53406|fgenesh3_pg.C_scaffold_15000091	scaffold_15	CBPS_CBWC_CBWF_1969_1		jgi|Coc_C169_1|13166|e_gw1.3.399.1	scaffold_3	1437_1_CBOZ_CBPA	Ot17g01790	OSTLU_28125	MICPUN_100752	MICPUCDRAFT_49131	VOLCADRAFT_76796
[KO:K00605]	2.1.2.10	aminomethyltransferase	CHLREDRAFT_196242		H632_c2816p0	contig-2816	a18688r212		jgi|ChlNC64A_1|48182|fgenesh3_kg.C_scaffold_6000004	scaffold_6	CBPS_CBWC_CBWF_2569_1		jgi|Coc_C169_1|47327|estExt_fgenesh1_pg.C_70142	scaffold_7	3621_2_CBOZ_CBPA	Ot10g02850	OSTLU_26241	MICPUN_59804		VOLCADRAFT_107582
[KO:K01455]	3.5.1.49	formamidase	CHLREDRAFT_132166										jgi|Coc_C169_1|35997|fgenesh1_pm.5_#_96	scaffold_5	3067_1_CBOZ_CBPA
[KO:K01915]	6.3.1.2	glutamine synthetase	CHLREDRAFT_129468, 133971, 136895		H632_c1293p0	contig-1293	a12412r254		jgi|ChlNC64A_1|143431|IGS.gm_6_00005, |48539|fgenesh3_pm.C_scaffold_3000039	scaffold_3	CBPS_CBWC_CBWF_556_1		jgi|Coc_C169_1|63040|Genemark1.3823_g, |4237|gw1.6.190.1	scaffold_7, 6	207_1_, 764_1_CBOZ_CBPA	Ot01g04890	OSTLU_39960	MICPUN_112708, 113822, 58286	MICPUCDRAFT_30309, 4228, 55724	VOLCADRAFT_103492, 77041
[KO:K01953]	6.3.5.4	asparagine synthase (glutamine-hydrolysing)	CHLREDRAFT_140252		H632_c155p1	contig-155	a7515r312		jgi|ChlNC64A_1|134619|IGS.gm_12_00005	scaffold_12	CBPS_CBWC_CBWF_368_1		jgi|Coc_C169_1|1654|gw1.1.164.1	scaffold_1	1619_0_CBOZ5130.b1_CBOZ_CBPA	Ot03g01250	OSTLU_45116	MICPUN_100000	MICPUCDRAFT_21388	VOLCADRAFT_65699
[KO:K03521]	---	electron transfer flavoprotein beta subunit	CHLREDRAFT_180281		H632_c775p1	contig-775	a16862r170		jgi|ChlNC64A_1|48421|fgenesh3_pm.C_scaffold_1000044	scaffold_1	CBPS_CBWC_CBWF_8_0_CBWF3712.b3		jgi|Coc_C169_1|36222|fgenesh1_pm.6_#_70	scaffold_6						VOLCADRAFT_96652
[KO:K03522]	---	electron transfer flavoprotein alpha subunit	CHLREDRAFT_189344		H632_c125p4	contig-125	a30109r202		jgi|ChlNC64A_1|140308|IGS.gm_3_00047	scaffold_3			jgi|Coc_C169_1|35267|fgenesh1_pm.2_#_277	scaffold_2						VOLCADRAFT_120852
00920_Sulfur_metabolism
[KO:K00380]	1.8.1.2	sulfite reductase (NADPH) flavoprotein alpha-component	CHLREDRAFT_188119		H632_c1527p0	contig-1527	a97736r35		jgi|ChlNC64A_1|143602|IGS.gm_6_00176	scaffold_6	CBPS_CBWC_CBWF_2161_1		jgi|Coc_C169_1|53320|estExt_fgenesh1_pm.C_70014	scaffold_7	3496_1_CBOZ_CBPA					VOLCADRAFT_86939
[KO:K00387]	1.8.3.1	sulfite oxidase	CHLREDRAFT_59800		H632_c19p3	contig-19	a38715r182		jgi|ChlNC64A_1|34922|estExt_Genewise1Plus.C_60329	scaffold_6	CBPS_CBWC_CBWF_78_1		jgi|Coc_C169_1|2207|gw1.7.122.1	scaffold_7	922_1_CBOZ_CBPA		OSTLU_3554	MICPUN_68463		VOLCADRAFT_81306
[KO:K00392]	1.8.7.1	sulfite reductase (ferredoxin)	CHLREDRAFT_206154		H632_c96p0	contig-96	a13491r137		jgi|ChlNC64A_1|48914|fgenesh3_pm.C_scaffold_13000004	scaffold_13	CBPS_CBWC_CBWF_420_1		jgi|Coc_C169_1|28400|estExt_Genewise1Plus.C_50466	scaffold_5	1144_0_CBOZ5852.b1_CBOZ_CBPA	Ot12g00150	OSTLU_25282	MICPUN_62484	MICPUCDRAFT_34650	VOLCADRAFT_104014
[KO:K00640]	2.3.1.30	serine O-acetyltransferase	CHLREDRAFT_205984, 205985		H632_c231p2, c785p1	contig-231, 785	a14832r148, a5446r271		jgi|ChlNC64A_1|10994|gw1.24.142.1, |134202|IGS.gm_11_00048	scaffold_11	CBPS_CBWC_CBWF_1440_1, _0_0_CBWF6382.b1		jgi|Coc_C169_1|5040|gw1.4.458.1, |13649|e_gw1.4.458.1	scaffold_4	3285_1_CBOZ_CBPA	Ot07g04550	OSTLU_5580, 87889	MICPUN_76256, 96480	MICPUCDRAFT_23038, 30855	VOLCADRAFT_105655, 74427
[KO:K00860]	2.7.1.25	adenylylsulfate kinase	CHLREDRAFT_184419		H632_c120p1	contig-120	a5625r240		jgi|ChlNC64A_1|59439|estExt_fgenesh3_pg.C_420006	scaffold_31	CBPS_CBWC_CBWF_1844_1		jgi|Coc_C169_1|34996|fgenesh1_pm.2_#_6	scaffold_2	365_1_CBOZ_CBPA	Ot09g03000	OSTLU_19676	MICPUN_54830	MICPUCDRAFT_49355
[KO:K00958]	2.7.7.4	sulfate adenylyltransferase	CHLREDRAFT_133924, 196910		H632_c211p2	contig-211	a9784r152		jgi|ChlNC64A_1|145209|IGS.gm_9_00016, |21820|e_gw1.6.73.1	scaffold_9			jgi|Coc_C169_1|56657|Genemark1.5686_g	scaffold_12	723_0_CBOZ2461.g1_CBOZ_CBPA	Ot10g00290	OSTLU_37879	MICPUN_97880	MICPUCDRAFT_30508	VOLCADRAFT_81084, 90775
[KO:K01738]	2.5.1.47	cysteine synthase A	CHLREDRAFT_175651, 189320, 196485, 196886		H632_c1050p0, c576p0	contig-1050, 576	a26465r185, a30441r47		jgi|ChlNC64A_1|142080|IGS.gm_4_00221, |139772|IGS.gm_26_00125, |18833|e_gw1.2.593.1	scaffold_26, 2	CBPS_CBWC_CBWF_1504_1, _712_1, _712_2		jgi|Coc_C169_1|46638|estExt_fgenesh1_pg.C_40174, |35350|fgenesh1_pm.3_#_25, |37617|fgenesh1_pm.14_#_51, |54270|estExt_fgenesh1_pm.C_140118	scaffold_14	3370_1_, 2871_1_CBOZ_CBPA	Ot06g04880, Ot12g03090	OSTLU_26961, 41218	MICPUN_105187, 96933	MICPUCDRAFT_22529, 31117	VOLCADRAFT_108440, 58530, 79370, 89892
[KO:K01739]	2.5.1.48	cystathionine gamma-synthase	CHLREDRAFT_24268		H632_c3287p0	contig-3287	a24027r118		jgi|ChlNC64A_1|24830|e_gw1.14.83.1	scaffold_14	CBPS_CBWC_CBWF_453_1		jgi|Coc_C169_1|3395|gw1.2.284.1	scaffold_2	3624_2_CBOZ_CBPA	Ot09g01000	OSTLU_17120, 33390	MICPUN_98339	MICPUCDRAFT_25455	VOLCADRAFT_75793
[KO:K01760]	4.4.1.8	cystathionine beta-lyase	CHLREDRAFT_196483		H632_c5p1	contig-5	a45630r67		jgi|ChlNC64A_1|140666|IGS.gm_3_00405	scaffold_3	CBPS_CBWC_CBWF_453_1		jgi|Coc_C169_1|37091|fgenesh1_pm.10_#_179	scaffold_10	2432_1_CBOZ_CBPA	Ot09g02610	OSTLU_88245	MICPUN_96733	MICPUCDRAFT_2994	VOLCADRAFT_68235
[KO:K15422]	3.1.3.7; 3.1.3.57	3'(2'), 5'-bisphosphate nucleotidase / inositol polyphosphate 1-phosphatase	CHLREDRAFT_146533			contig-566			jgi|ChlNC64A_1|36008|estExt_Genewise1Plus.C_140053	scaffold_14	CBPS_CBWC_CBWF_3749_0_CBWF2009.b1		jgi|Coc_C169_1|37844|fgenesh1_pm.16_#_9	scaffold_16				MICPUN_88595		VOLCADRAFT_65837
00950_Isoquinoline_alkaloid_biosynthesis
[KO:K00274]	1.4.3.4	monoamine oxidase	CHLREDRAFT_187700																	VOLCADRAFT_60905
[KO:K00276]	1.4.3.21	primary-amine oxidase	CHLREDRAFT_176519, 178662				a50011r54		jgi|ChlNC64A_1|49652|fgenesh3_pg.C_scaffold_1000350	scaffold_12	CBPS_CBWC_CBWF_834_1, _834_0_CBPS632.b1		jgi|Coc_C169_1|33265|fgenesh1_kg.8_#_67_#_561_1_CBOZ_CBPA, |1298|gw1.8.55.1	scaffold_5, 8	561_1_CBOZ_CBPA			MICPUN_56524		VOLCADRAFT_84774
[KO:K00811]	2.6.1.1	aspartate aminotransferase, chloroplastic	CHLREDRAFT_186959		H632_c1503p0	contig-1503	a190286r26		jgi|ChlNC64A_1|137913|IGS.gm_2_00380	scaffold_2	CBPS_CBWC_CBWF_802_1		jgi|Coc_C169_1|38638|fgenesh1_pm.24_#_7	scaffold_14	1112_1_CBOZ_CBPA			MICPUN_99771	MICPUCDRAFT_30404	VOLCADRAFT_81153
[KO:K01593]	4.1.1.28	aromatic-L-amino-acid decarboxylase	CHLREDRAFT_116869		H632_c2p5	contig-2	a3200r662		jgi|ChlNC64A_1|7815|gw1.33.21.1	scaffold_33	CBPS_CBWC_CBWF_0_0_CBWC3982.b1		jgi|Coc_C169_1|2760|gw1.10.132.1	scaffold_10	325_1_CBOZ_CBPA
[KO:K14454]	2.6.1.1	aspartate aminotransferase, cytoplasmic	CHLREDRAFT_174097		H632_c1503p0	contig-1503	a6744r266		jgi|ChlNC64A_1|59142|estExt_fgenesh3_pg.C_270006	scaffold_2	CBPS_CBWC_CBWF_2147_1		jgi|Coc_C169_1|38233|fgenesh1_pm.19_#_55	scaffold_19	1112_1_CBOZ_CBPA					VOLCADRAFT_82929
[KO:K14455]	2.6.1.1	aspartate aminotransferase, mitochondrial	CHLREDRAFT_126943		H632_c1503p0	contig-1503	a6744r266		jgi|ChlNC64A_1|54903|fgenesh3_pg.C_scaffold_27000007	scaffold_2	CBPS_CBWC_CBWF_2147_1		jgi|Coc_C169_1|2107|gw1.14.65.1	scaffold_14	1112_1_CBOZ_CBPA	Ot05g01290	OSTLU_31597
[KO:K15849]	2.6.1.1; 2.6.1.78; 2.6.1.79	bifunctional aspartate aminotransferase and glutamate/aspartate-prephenate aminotransferase	CHLREDRAFT_118364		H632_c2822p1	contig-2822	a10944r174		jgi|ChlNC64A_1|137954|IGS.gm_2_00421	scaffold_2	CBPS_CBWC_CBWF_8_0_CBWF1262.g1		jgi|Coc_C169_1|63163|Genemark1.3946_g	scaffold_7	91_2_CBOZ_CBPA	Ot16g00690	OSTLU_89248	MICPUN_59090	MICPUCDRAFT_71025	VOLCADRAFT_103084
00960_Tropane_piperidine_and_pyridine_alkaloid_biosynthesis
[KO:K00276]	1.4.3.21	primary-amine oxidase	CHLREDRAFT_176519, 178662				a50011r54		jgi|ChlNC64A_1|49652|fgenesh3_pg.C_scaffold_1000350	scaffold_12	CBPS_CBWC_CBWF_834_1, _834_0_CBPS632.b1		jgi|Coc_C169_1|33265|fgenesh1_kg.8_#_67_#_561_1_CBOZ_CBPA, |1298|gw1.8.55.1	scaffold_5, 8	561_1_CBOZ_CBPA			MICPUN_56524		VOLCADRAFT_84774
[KO:K00811]	2.6.1.1	aspartate aminotransferase, chloroplastic	CHLREDRAFT_186959		H632_c1503p0	contig-1503	a190286r26		jgi|ChlNC64A_1|137913|IGS.gm_2_00380	scaffold_2	CBPS_CBWC_CBWF_802_1		jgi|Coc_C169_1|38638|fgenesh1_pm.24_#_7	scaffold_14	1112_1_CBOZ_CBPA			MICPUN_99771	MICPUCDRAFT_30404	VOLCADRAFT_81153
[KO:K00817]	2.6.1.9	histidinol-phosphate aminotransferase	CHLREDRAFT_103841		H632_c1923p0	contig-1923	a49441r101		jgi|ChlNC64A_1|9280|gw1.29.51.1	scaffold_29			jgi|Coc_C169_1|38712|fgenesh1_pm.25_#_37	scaffold_25	494_1_CBOZ_CBPA		OSTLU_119523	MICPUN_107360	MICPUCDRAFT_49460	VOLCADRAFT_109854
[KO:K08081]	1.1.1.206	Tropinone reductase 1	CHLREDRAFT_128624		H632_c314p0	contig-1830	a16256r222		jgi|ChlNC64A_1|24371|e_gw1.12.577.1	scaffold_12	CBPS_CBWC_CBWF_2889_1		jgi|Coc_C169_1|7058|gw1.1.621.1	scaffold_1	1904_1_CBOZ_CBPA	Ot16g01100	OSTLU_34089	MICPUN_112662, 78726	MICPUCDRAFT_43874	VOLCADRAFT_85348
[KO:K14454]	2.6.1.1	aspartate aminotransferase, cytoplasmic	CHLREDRAFT_174097		H632_c1503p0	contig-1503	a6744r266		jgi|ChlNC64A_1|59142|estExt_fgenesh3_pg.C_270006	scaffold_2	CBPS_CBWC_CBWF_2147_1		jgi|Coc_C169_1|38233|fgenesh1_pm.19_#_55	scaffold_19	1112_1_CBOZ_CBPA					VOLCADRAFT_82929
[KO:K14455]	2.6.1.1	aspartate aminotransferase, mitochondrial	CHLREDRAFT_126943		H632_c1503p0	contig-1503	a6744r266		jgi|ChlNC64A_1|54903|fgenesh3_pg.C_scaffold_27000007	scaffold_2	CBPS_CBWC_CBWF_2147_1		jgi|Coc_C169_1|2107|gw1.14.65.1	scaffold_14	1112_1_CBOZ_CBPA	Ot05g01290	OSTLU_31597
[KO:K15849]	2.6.1.1; 2.6.1.78; 2.6.1.79	bifunctional aspartate aminotransferase and glutamate/aspartate-prephenate aminotransferase	CHLREDRAFT_118364		H632_c2822p1	contig-2822	a10944r174		jgi|ChlNC64A_1|137954|IGS.gm_2_00421	scaffold_2	CBPS_CBWC_CBWF_8_0_CBWF1262.g1		jgi|Coc_C169_1|63163|Genemark1.3946_g	scaffold_7	91_2_CBOZ_CBPA	Ot16g00690	OSTLU_89248	MICPUN_59090	MICPUCDRAFT_71025	VOLCADRAFT_103084
00970_Aminoacyl-tRNA_biosynthesis
[KO:K00604]	2.1.2.9	methionyl-tRNA formyltransferase	CHLREDRAFT_83209		H632_c1151p1	contig-1151	a56919r27		jgi|ChlNC64A_1|134966|IGS.gm_12_00352	scaffold_12			jgi|Coc_C169_1|4988|gw1.12.218.1	scaffold_12	4475_0_CBOZ1795.b1_CBOZ_CBPA	Ot11g01750	OSTLU_43843	MICPUN_69926	MICPUCDRAFT_40021	VOLCADRAFT_106047
[KO:K01866]	6.1.1.1	tyrosyl-tRNA synthetase	CHLREDRAFT_101947, 104512, 139405		H632_c847p1, c844p0	contig-847, 844, 5041	a15242r252, a6158r301, a249004r15		jgi|ChlNC64A_1|48951|fgenesh3_pm.C_scaffold_14000025, |35158|estExt_Genewise1Plus.C_80253, |16559|gw1.8.400.1	scaffold_14, 8	CBPS_CBWC_CBWF_2589_1, _0_0_CBWF7892.g1		jgi|Coc_C169_1|60738|Genemark1.1549_g, |54376|estExt_fgenesh1_pm.C_160002, |3134|gw1.3.179.1	scaffold_3, 16	525_1_CBOZ_CBPA	Ot02g04300, Ot06g03180	OSTLU_119608, 15823	MICPUN_107403, 79172	MICPUCDRAFT_2459, 69880	VOLCADRAFT_43315, 83275
[KO:K01867]	6.1.1.2	tryptophanyl-tRNA synthetase	CHLREDRAFT_192647, 58645		H632_c2436p0, c834p1	contig-2436, 834	a19283r151, a15353r62		jgi|ChlNC64A_1|136663|IGS.gm_17_00067, |138212|IGS.gm_2_00679	scaffold_17, 2	CBPS_CBWC_CBWF_292_0_CBWF7171.b1, _0_0_CBPS1885.g1		jgi|Coc_C169_1|4505|gw1.3.250.1, |29225|estExt_Genewise1Plus.C_80392	scaffold_3, 8	2950_1_CBOZ_CBPA	Ot06g01950	OSTLU_19560, 32113	MICPUN_108728, 84056	MICPUCDRAFT_21200, 51831	VOLCADRAFT_63500, 80016
[KO:K01868]	6.1.1.3	threonyl-tRNA synthetase	CHLREDRAFT_111453, 167047		H632_c506p2, c252p1	contig-506, 252	a7094r182, a6931r350		jgi|ChlNC64A_1|56367|estExt_fgenesh3_pm.C_260021, |56317|estExt_fgenesh3_pm.C_230007	scaffold_26, 23	CBPS_CBWC_CBWF_1542_1, _471_1		jgi|Coc_C169_1|36248|fgenesh1_pm.6_#_96, |14812|e_gw1.6.46.1	scaffold_6	3804_1_CBOZ_CBPA	Ot07g00270, Ot07g01140	OSTLU_24771, 46103	MICPUN_78424, 79308	MICPUCDRAFT_33234, 49582	VOLCADRAFT_102823, 70347
[KO:K01869]	6.1.1.4	leucyl-tRNA synthetase	CHLREDRAFT_39075		H632_c1866p0	contig-1866	a8364r155		jgi|ChlNC64A_1|6371|gw1.26.7.1	scaffold_26	CBPS_CBWC_CBWF_495_2		jgi|Coc_C169_1|38092|fgenesh1_pm.18_#_45	scaffold_18	4318_1_CBOZ_CBPA	Ot04g01760, Ot06g00560	OSTLU_31093, 41128	MICPUN_80747, 89596	MICPUCDRAFT_46961, 58989	VOLCADRAFT_103034, 89222
[KO:K01870]	6.1.1.5	isoleucyl-tRNA synthetase	CHLREDRAFT_106327, 139213		H632_c1412p0, c640p0	contig-1412, 640	a68000r44, a9059r334		jgi|ChlNC64A_1|36905|estExt_Genewise1Plus.C_230074, |137710|IGS.gm_2_00177	scaffold_23, 2	CBPS_CBWC_CBWF_892_1, _3409_0_CBWC3869.g1		jgi|Coc_C169_1|52099|estExt_fgenesh1_pm.C_10059, |53749|estExt_fgenesh1_pm.C_100066	scaffold_1, 10	4088_1_CBOZ_CBPA, 93_0_CBPA1263.b1_CBOZ_CBPA	Ot02g03640, Ot04g00470	OSTLU_119549, 45389	MICPUN_107348, 97914	MICPUCDRAFT_31655, 46060	VOLCADRAFT_81773
[KO:K01872]	6.1.1.7	alanyl-tRNA synthetase	CHLREDRAFT_119554, 38643		H632_c524p2	contig-524	a11095r437, a365r307		jgi|ChlNC64A_1|143654|IGS.gm_6_00228	scaffold_6	CBPS_CBWC_CBWF_1757_1		jgi|Coc_C169_1|37790|fgenesh1_pm.15_#_66, |57203|Genemark1.6232_g	scaffold_15, 14	674_1_CBOZ_CBPA	Ot04g04960, Ot07g01940	OSTLU_32618, 37270	MICPUN_62346, 79369	MICPUCDRAFT_16345, 45734	VOLCADRAFT_120886, 89008
[KO:K01873]	6.1.1.9	valyl-tRNA synthetase	CHLREDRAFT_136266, 56638		H632_c865p0	contig-865	a123326r34, a54031r80		jgi|ChlNC64A_1|54742|fgenesh3_pg.C_scaffold_25000017, |141931|IGS.gm_4_00072	scaffold_25, 4	CBPS_CBWC_CBWF_3809_0_CBWF3161.b1		jgi|Coc_C169_1|11007|e_gw1.1.44.1, |38458|fgenesh1_pm.21_#_39	scaffold_1, 21	566_0_CBPA436.b1_CBOZ_CBPA	Ot03g02880, Ot08g03670	OSTLU_33832, 42662	MICPUN_84188, 96323	MICPUCDRAFT_45875, 47388	VOLCADRAFT_107675, 60821
[KO:K01874]	6.1.1.10	methionyl-tRNA synthetase	CHLREDRAFT_114761, 97144		H632_c2399p0, c1077p1	contig-2399, 1077	a27643r94, a3628r404		jgi|ChlNC64A_1|16442|gw1.12.510.1, |26593|e_gw1.21.123.1	scaffold_12, 14	CBPS_CBWC_CBWF_1642_1, _489_1		jgi|Coc_C169_1|2138|gw1.1.205.1, |42830|fgenesh1_pg.11_#_38	scaffold_1, 11		Ot04g02830	OSTLU_36966	MICPUN_58148	MICPUCDRAFT_70268	VOLCADRAFT_58186, 82392
[KO:K01875]	6.1.1.11	seryl-tRNA synthetase	CHLREDRAFT_206186, 97141		H632_c322p1, c4533p0	contig-322, 4533	a9275r214		jgi|ChlNC64A_1|34888|estExt_Genewise1Plus.C_60205, |48479|fgenesh3_pm.C_scaffold_2000034	scaffold_6, 2	CBPS_CBWC_CBWF_2180_1, _0_0_CBWF5270.b1		jgi|Coc_C169_1|36461|fgenesh1_pm.7_#_77, |19044|e_gw1.17.197.1	scaffold_7, 17	4045_1_CBOZ_CBPA, 1079_0_CBOZ764.g1_CBOZ_CBPA	Ot04g01720	OSTLU_3486, 37135	MICPUN_58112, 80937	MICPUCDRAFT_44315, 70902	VOLCADRAFT_81049, 82377
[KO:K01876]	6.1.1.12	aspartyl-tRNA synthetase	CHLREDRAFT_191617, 196583		H632_c1258p0, c339p1	contig-1258, 339	a24152r233, a62758r51		jgi|ChlNC64A_1|133494|IGS.gm_1_00630, |35428|estExt_Genewise1Plus.C_100159	scaffold_1, 10	CBPS_CBWC_CBWF_1359_1, _2930_1		jgi|Coc_C169_1|36230|fgenesh1_pm.6_#_78, |1906|gw1.2.166.1	scaffold_6, 2	2257_1_CBOZ_CBPA	Ot08g03540, Ot11g02740	OSTLU_16561, 88658	MICPUN_84428, 98184	MICPUCDRAFT_33627, 44735	VOLCADRAFT_72624
[KO:K01880]	6.1.1.14	glycyl-tRNA synthetase	CHLREDRAFT_82920		H632_c1394p0	contig-1394	a27196r116		jgi|ChlNC64A_1|56865|estExt_fgenesh3_pg.C_30110	scaffold_3	CBPS_CBWC_CBWF_203_1		jgi|Coc_C169_1|44262|fgenesh1_pg.17_#_17	scaffold_17	2459_1_CBOZ_CBPA	Ot07g02640	OSTLU_12730	MICPUN_78842	MICPUCDRAFT_57478	VOLCADRAFT_75635
[KO:K01881]	6.1.1.15	prolyl-tRNA synthetase	CHLREDRAFT_138922, 186253		H632_c116p0	contig-116	a4829r149, a21618r96		jgi|ChlNC64A_1|7660|gw1.12.83.1	scaffold_12, 6	CBPS_CBWC_CBWF_1281_1, _1668_1		jgi|Coc_C169_1|2541|gw1.4.234.1, |36495|fgenesh1_pm.7_#_111	scaffold_4, 7	3641_1_CBOZ_CBPA	Ot15g00620	OSTLU_18002, 19561	MICPUN_84342, 96756	MICPUCDRAFT_19834	VOLCADRAFT_109913, 84558
[KO:K01883]	6.1.1.16	cysteinyl-tRNA synthetase	CHLREDRAFT_153062, 188223		H632_c1920p0, c4342p0	contig-1920, 4342	a51591r47, a104053r45		jgi|ChlNC64A_1|137034|IGS.gm_18_00140, |7916|gw1.18.48.1	scaffold_18	CBPS_CBWC_CBWF_3814_0_CBWF3228.b1		jgi|Coc_C169_1|2519|gw1.4.231.1, |1550|gw1.6.63.1	scaffold_4, 6		Ot03g05070, Ot10g00100	OSTLU_34104, 37953	MICPUN_113739, 96617	MICPUCDRAFT_22077, 46077	VOLCADRAFT_58337, 66444
[KO:K01885]	6.1.1.17	glutamyl-tRNA synthetase	CHLREDRAFT_195543, 195574		H632_c1465p0, c902p0	contig-1465, 902	a7329r255, a119178r26		jgi|ChlNC64A_1|26204|e_gw1.19.10.1, |35806|estExt_Genewise1Plus.C_120366	scaffold_19, 12	CBPS_CBWC_CBWF_382_1, _668_1		jgi|Coc_C169_1|852|gw1.9.47.1, |2624|gw1.2.222.1	scaffold_4, 2	2802_0_CBOZ1290.b1_CBOZ_CBPA	Ot01g04070, Ot01g04250	OSTLU_39738, 49888	MICPUN_93354	MICPUCDRAFT_21054, 64448	VOLCADRAFT_106276, 77768
[KO:K01887]	6.1.1.19	arginyl-tRNA synthetase	CHLREDRAFT_119290		H632_c749p0	contig-749	a14109r200		jgi|ChlNC64A_1|26269|e_gw1.19.4.1	scaffold_19	CBPS_CBWC_CBWF_755_1		jgi|Coc_C169_1|37406|fgenesh1_pm.12_#_149	scaffold_12		Ot02g02670	OSTLU_119542	MICPUN_112725	MICPUCDRAFT_31931	VOLCADRAFT_108162
[KO:K01889]	6.1.1.20	phenylalanyl-tRNA synthetase alpha chain	CHLREDRAFT_137578, 166227		H632_c689p0, c645p1	contig-689, 645	a21431r202, a19759r203		jgi|ChlNC64A_1|22470|e_gw1.8.180.1, |8769|gw1.5.143.1	scaffold_8, 5	CBPS_CBWC_CBWF_0_0_CBWF7329.b1		jgi|Coc_C169_1|16778|e_gw1.10.144.1, |31924|fgenesh1_kg.1_#_20_#_1610_1_CBOZ_CBPA	scaffold_10, 1	1610_1_CBOZ_CBPA	Ot02g03910, Ot09g01820	OSTLU_119609, 33470	MICPUN_61175, 64197	MICPUCDRAFT_18602, 70771	VOLCADRAFT_77052, 82992
[KO:K01890]	6.1.1.20	phenylalanyl-tRNA synthetase beta chain	CHLREDRAFT_193500		H632_c1074p1	contig-1074	a7643r144		jgi|ChlNC64A_1|36717|estExt_Genewise1Plus.C_200149	scaffold_20	CBPS_CBWC_CBWF_3279_0_CBWC1833.g1		jgi|Coc_C169_1|1784|gw1.3.101.1	scaffold_3	631_1_CBOZ_CBPA	Ot18g00560	OSTLU_28254	MICPUN_57307	MICPUCDRAFT_45062	VOLCADRAFT_120443
[KO:K01892]	6.1.1.21	histidyl-tRNA synthetase	CHLREDRAFT_112211		H632_c997p0	contig-997	a261554r21		jgi|ChlNC64A_1|139639|IGS.gm_25_00190	scaffold_25	CBPS_CBWC_CBWF_1234_0_CBPS3279.b1		jgi|Coc_C169_1|36488|fgenesh1_pm.7_#_104	scaffold_7	0_0_CBPA6081.b1_CBOZ_CBPA	Ot11g03490, Ot14g01250	OSTLU_29417, 88696	MICPUN_68035, 92337	MICPUCDRAFT_36675	VOLCADRAFT_63503, 64783
[KO:K01893]	6.1.1.22	asparaginyl-tRNA synthetase	CHLREDRAFT_117306		H632_c1740p0	contig-1740	a2513r551		jgi|ChlNC64A_1|21495|e_gw1.6.27.1	scaffold_6	CBPS_CBWC_CBWF_1359_1		jgi|Coc_C169_1|36391|fgenesh1_pm.7_#_7	scaffold_7	335_1_CBOZ_CBPA	Ot11g02200, Ot13g01630	OSTLU_51201, 88630	MICPUN_59321, 63150	MICPUCDRAFT_51256, 63451	VOLCADRAFT_77490
[KO:K02433]	6.3.5.6; 6.3.5.7	aspartyl-tRNA(Asn)/glutamyl-tRNA(Gln) amidotransferase subunit A	CHLREDRAFT_188401		H632_c386p0	contig-386	a185316r24		jgi|ChlNC64A_1|56360|estExt_fgenesh3_pm.C_260014	scaffold_26	CBPS_CBWC_CBWF_962_1		jgi|Coc_C169_1|54845|estExt_fgenesh1_pm.C_220007	scaffold_22	4723_0_CBOZ4700.b1_CBOZ_CBPA	Ot02g01810	OSTLU_119596	MICPUN_113306	MICPUCDRAFT_21214, 64393	VOLCADRAFT_86683
[KO:K03341]	2.9.1.2	O-phospho-L-seryl-tRNASec:L-selenocysteinyl-tRNA synthase	CHLREDRAFT_117639						jgi|ChlNC64A_1|19872|e_gw1.3.121.1	scaffold_3			jgi|Coc_C169_1|3382|gw1.2.283.1	scaffold_2			OSTLU_35440	MICPUN_56124	MICPUCDRAFT_16680	VOLCADRAFT_66969
[KO:K04567]	6.1.1.6	lysyl-tRNA synthetase, class II	CHLREDRAFT_115135, 138493		H632_c1168p0	contig-1168	a19092r200		jgi|ChlNC64A_1|7852|gw1.9.47.1, |7106|gw1.22.24.1	scaffold_9, 22	CBPS_CBWC_CBWF_1601_1		jgi|Coc_C169_1|34968|fgenesh1_pm.1_#_309, |1650|gw1.2.135.1	scaffold_2	2257_1_CBOZ_CBPA	Ot11g01040, Ot14g02180	OSTLU_29494, 50879	MICPUN_103834, 87128	MICPUCDRAFT_20661, 53494	VOLCADRAFT_62618, 76143
[KO:K10837]	2.7.1.164	O-phosphoseryl-tRNA(Sec) kinase	CHLREDRAFT_206160						jgi|ChlNC64A_1|140755|IGS.gm_3_00494	scaffold_3			jgi|Coc_C169_1|62949|Genemark1.3732_g			Ot09g01870		MICPUN_64194
[KO:K14164]	6.1.1.14	glycyl-tRNA synthetase	CHLREDRAFT_126079		H632_c195p0	contig-195	a57608r96		jgi|ChlNC64A_1|34296|estExt_Genewise1Plus.C_40023	scaffold_4	CBPS_CBWC_CBWF_0_0_CBWC5406.g1		jgi|Coc_C169_1|36786|fgenesh1_pm.9_#_43	scaffold_9	3638_1_CBOZ_CBPA	Ot02g07010	OSTLU_29834	MICPUN_86357	MICPUCDRAFT_27874	VOLCADRAFT_59982
01040_Biosynthesis_of_unsaturated_fatty_acids
[KO:K00059]	1.1.1.100	3-oxoacyl-[acyl-carrier protein] reductase	CHLREDRAFT_114298, 132065		H632_c4659p0, c2450p0	contig-4659, 2450	a8909r423, a12304r75		jgi|ChlNC64A_1|10140|gw1.11.128.1, |134318|IGS.gm_11_00164	scaffold_11	CBPS_CBWC_CBWF_1973_1, _2889_1		jgi|Coc_C169_1|36700|fgenesh1_pm.8_#_100, |38413|fgenesh1_pm.20_#_105	scaffold_8, 20	2916_1_, 2417_1_CBOZ_CBPA	Ot01g02200	OSTLU_12103	MICPUN_113389	MICPUCDRAFT_55323	VOLCADRAFT_60269, 79385
[KO:K00232]	1.3.3.6	acyl-CoA oxidase	CHLREDRAFT_121379, 122887, 170822, 40101		H632_c2497p0, c413p1, c2049p0	contig-2497, 2049, 5310	a6109r321, a6917r266		jgi|ChlNC64A_1|36152|estExt_Genewise1Plus.C_140395, |135478|IGS.gm_14_00011, |55215|fgenesh3_pg.C_scaffold_32000007, |25082|e_gw1.14.418.1	scaffold_14, 32	CBPS_CBWC_CBWF_1652_1, _2184_1, _3625_0_CBWC7047.b1, _3984_0_CBWF6724.b1		jgi|Coc_C169_1|35254|fgenesh1_pm.2_#_264, |37427|fgenesh1_pm.12_#_170, |14462|e_gw1.5.248.1, |54082|estExt_fgenesh1_pm.C_130004	scaffold_2, 5, 12, 13	3247_1_, 3517_0_CBOZ6919.b1_, 4875_0_CBOZ6060.b1_CBOZ_CBPA	Ot01g02610	OSTLU_13743	MICPUN_80126	MICPUCDRAFT_31340	VOLCADRAFT_104659, 58804, 92640, 93927, 93964
[KO:K00507]	1.14.19.1	stearoyl-CoA desaturase (delta-9 desaturase)	CHLREDRAFT_117883						jgi|ChlNC64A_1|56926|estExt_fgenesh3_pg.C_30218	scaffold_3			jgi|Coc_C169_1|11934|e_gw1.2.514.1	scaffold_2	781_1_CBOZ_CBPA	Ot17g02260	OSTLU_51664	MICPUN_81480	MICPUCDRAFT_4458	VOLCADRAFT_83090
[KO:K03921]	1.14.19.2	acyl-[acyl-carrier-protein] desaturase	CHLREDRAFT_205753		H632_c860p0	contig-860	a1292r1867		jgi|ChlNC64A_1|35191|estExt_Genewise1Plus.C_80340	scaffold_5	CBPS_CBWC_CBWF_1857_1		jgi|Coc_C169_1|36963|fgenesh1_pm.10_#_51	scaffold_10	921_1_CBOZ_CBPA	Ot04g03720	OSTLU_15111	MICPUN_107145	MICPUCDRAFT_45722	VOLCADRAFT_109049
[KO:K07513]	2.3.1.16	acetyl-CoA acyltransferase 1	CHLREDRAFT_138637		H632_c1964p1	contig-1964	a4945r347		jgi|ChlNC64A_1|16660|gw1.6.359.1	scaffold_6	CBPS_CBWC_CBWF_2185_2		jgi|Coc_C169_1|56826|Genemark1.5855_g	scaffold_12	149_1_CBOZ_CBPA		OSTLU_40909	MICPUN_105088	MICPUCDRAFT_44754	VOLCADRAFT_102696
[KO:K10255]	1.14.19.-	omega-6 fatty acid desaturase (delta-12 desaturase)	CHLREDRAFT_56668		H632_c664p0	contig-664	a13032r282		jgi|ChlNC64A_1|48341|fgenesh3_kg.C_scaffold_26000018	scaffold_26	CBPS_CBWC_CBWF_2775_1		jgi|Coc_C169_1|4102|gw1.6.180.1	scaffold_6	1209_1_CBOZ_CBPA					VOLCADRAFT_80845
[KO:K10256]	1.14.19.-	omega-6 fatty acid desaturase (delta-12 desaturase)	CHLREDRAFT_135825		H632_c664p0	contig-664	a13032r282		jgi|ChlNC64A_1|48812|fgenesh3_pm.C_scaffold_10000013	scaffold_10	CBPS_CBWC_CBWF_191_1		jgi|Coc_C169_1|53798|estExt_fgenesh1_pm.C_100125	scaffold_10	1934_1_CBOZ_CBPA					VOLCADRAFT_66373
[KO:K10257]	1.14.19.-	omega-3 fatty acid desaturase (delta-15 desaturase)	CHLREDRAFT_56237		H632_c664p0	contig-664	a13032r282		jgi|ChlNC64A_1|11743|gw1.43.21.1	scaffold_43	CBPS_CBWC_CBWF_191_1		jgi|Coc_C169_1|37464|fgenesh1_pm.13_#_32	scaffold_13	3806_1_CBOZ_CBPA			MICPUN_69560	MICPUCDRAFT_3762	VOLCADRAFT_76038
[KO:K10258]	1.3.1.93	very-long-chain enoyl-CoA reductase	CHLREDRAFT_602		H632_c257p1	contig-257	a143564r39		jgi|ChlNC64A_1|20732|e_gw1.4.232.1	scaffold_4			jgi|Coc_C169_1|53151|estExt_fgenesh1_pm.C_60024	scaffold_6	282_1_CBOZ_CBPA	Ot03g04010	OSTLU_49170	MICPUN_60190	MICPUCDRAFT_49391	VOLCADRAFT_72272
[KO:K10703]	4.2.1.134	very-long-chain (3R)-3-hydroxyacyl-[acyl-carrier protein] dehydratase	CHLREDRAFT_95439		H632_c446p0	contig-446	a18212r165		jgi|ChlNC64A_1|17502|gw1.2.661.1	scaffold_2			jgi|Coc_C169_1|8169|gw1.5.495.1	scaffold_5			OSTLU_13214, 29682	MICPUN_58684, 59337	MICPUCDRAFT_44656, 58952	VOLCADRAFT_61480, 83422
02010_ABC_transporters
[KO:K05656]	---	ATP-binding cassette, subfamily B (MDR/TAP), member 9	CHLREDRAFT_166297		H632_c167p2	contig-167	a19809r76		jgi|ChlNC64A_1|36052|estExt_Genewise1Plus.C_140175	scaffold_14	CBPS_CBWC_CBWF_1163_1		jgi|Coc_C169_1|19595|e_gw1.19.59.1	scaffold_45	3366_1_CBOZ_CBPA			MICPUN_98162	MICPUCDRAFT_20532	VOLCADRAFT_87744
[KO:K05658]	---	ATP-binding cassette, subfamily B (MDR/TAP), member 1	CHLREDRAFT_138602, 138672		H632_c137p0	contig-2470	a5188r152		jgi|ChlNC64A_1|29897|estExt_Genewise1.C_30589	scaffold_5	CBPS_CBWC_CBWF_1163_1		jgi|Coc_C169_1|35186|fgenesh1_pm.2_#_196	scaffold_45	3366_1_CBOZ_CBPA	Ot01g04530	OSTLU_48483	MICPUN_75054	MICPUCDRAFT_27897	VOLCADRAFT_103054
[KO:K05663]	---	mitochondrial ABC transporter ATM	CHLREDRAFT_105113		H632_c1554p0	contig-1554	a38066r65		jgi|ChlNC64A_1|6721|gw1.21.9.1	scaffold_14	CBPS_CBWC_CBWF_0_0_CBWC6697.b1		jgi|Coc_C169_1|17037|e_gw1.11.34.1	scaffold_45	2520_1_CBOZ_CBPA	Ot13g00850	OSTLU_13171	MICPUN_58287	MICPUCDRAFT_45420	VOLCADRAFT_40714
03008_Ribosome_biogenesis_in_eukaryotes
[KO:K03097]	2.7.11.1	casein kinase II subunit alpha	CHLREDRAFT_190856, 194436		H632_c1288p0	contig-1288	a1415r593		jgi|ChlNC64A_1|56386|estExt_fgenesh3_pm.C_290002	scaffold_29	CBPS_CBWC_CBWF_3825_0_CBWF3666.g1		jgi|Coc_C169_1|13211|e_gw1.4.446.1, |52865|estExt_fgenesh1_pm.C_40194	scaffold_4	3124_2_CBOZ_CBPA	Ot12g02620	OSTLU_13142	MICPUN_51087	MICPUCDRAFT_30735	VOLCADRAFT_109045, 83608, 84748
[KO:K03115]	---	casein kinase II subunit beta	CHLREDRAFT_116537		H632_c1604p0	contig-1604	a1157r756		jgi|ChlNC64A_1|143128|IGS.gm_5_00457	scaffold_5			jgi|Coc_C169_1|53010|estExt_fgenesh1_pm.C_50088	scaffold_5	15_1_CBOZ_CBPA	Ot02g03010	OSTLU_44941	MICPUN_107344	MICPUCDRAFT_31521
[KO:K03264]	---	translation initiation factor 6	CHLREDRAFT_188065		H632_c1409p1	contig-1409	a7231r460		jgi|ChlNC64A_1|48114|fgenesh3_kg.C_scaffold_3000010	scaffold_3	CBPS_CBWC_CBWF_2924_1		jgi|Coc_C169_1|38248|fgenesh1_pm.19_#_70	scaffold_19	3527_1_CBOZ_CBPA	Ot02g00780	OSTLU_119613	MICPUN_107364	MICPUCDRAFT_64933	VOLCADRAFT_80373
[KO:K03537]	3.1.26.5	ribonuclease P/MRP protein subunit POP5	CHLREDRAFT_171674				a14095r247		jgi|ChlNC64A_1|143925|IGS.gm_6_00499					scaffold_3		Ot04g03980	OSTLU_31306	MICPUN_74127	MICPUCDRAFT_8915
[KO:K03539]	3.1.26.5	ribonuclease P/MRP protein subunit RPP1	CHLREDRAFT_166399			contig-381			jgi|ChlNC64A_1|141792|IGS.gm_38_00055	scaffold_38			jgi|Coc_C169_1|42832|fgenesh1_pg.11_#_40			Ot11g00520	OSTLU_26376	MICPUN_87026	MICPUCDRAFT_50991	VOLCADRAFT_67773
[KO:K06943]	---	nucleolar GTP-binding protein	CHLREDRAFT_134773, 173731		H632_c892p0, c30p2	contig-892, 30	a2088r460, a41069r58		jgi|ChlNC64A_1|6693|gw1.33.7.1, |16774|gw1.5.588.1	scaffold_33, 5	CBPS_CBWC_CBWF_1323_1		jgi|Coc_C169_1|37208|fgenesh1_pm.11_#_105, |5565|gw1.5.338.1	scaffold_11, 5	847_2_CBOZ_CBPA		OSTLU_3188, 35887	MICPUN_75968, 83165	MICPUCDRAFT_28298, 55784	VOLCADRAFT_57006, 95251
[KO:K07179]	2.7.11.1	RIO kinase 2	CHLREDRAFT_138512		H632_c50p2	contig-50	a112448r34		jgi|ChlNC64A_1|32874|estExt_Genewise1.C_260098	scaffold_26	CBPS_CBWC_CBWF_1927_1		jgi|Coc_C169_1|6385|gw1.29.18.1	scaffold_29	3511_1_CBOZ_CBPA	Ot06g01790	OSTLU_40859	MICPUN_79518	MICPUCDRAFT_17560	VOLCADRAFT_106246
[KO:K07562]	---	nonsense-mediated mRNA decay protein 3	CHLREDRAFT_194349		H632_c616p0	contig-616	a22618r128		jgi|ChlNC64A_1|30097|estExt_Genewise1.C_40301	scaffold_4	CBPS_CBWC_CBWF_0_0_CBWC4061.b1		jgi|Coc_C169_1|24569|estExt_Genewise1.C_110331	scaffold_11	4669_0_CBOZ4062.g1_CBOZ_CBPA	Ot16g00990	OSTLU_3943	MICPUN_64576	MICPUCDRAFT_22366	VOLCADRAFT_69446
[KO:K07936]	---	GTP-binding nuclear protein Ran	CHLREDRAFT_128522		H632_c885p1	contig-885	a1479r2448		jgi|ChlNC64A_1|48960|fgenesh3_pm.C_scaffold_14000034	scaffold_14	CBPS_CBWC_CBWF_853_1		jgi|Coc_C169_1|35268|fgenesh1_pm.2_#_278	scaffold_2	612_1_CBOZ_CBPA	Ot13g01210	OSTLU_41856	MICPUN_82870	MICPUCDRAFT_33456	VOLCADRAFT_110055
[KO:K11108]	---	RNA 3'-terminal phosphate cyclase-like protein	CHLREDRAFT_138936		H632_c308p1	contig-308	a17936r121		jgi|ChlNC64A_1|18568|e_gw1.1.668.1	scaffold_1			jgi|Coc_C169_1|38489|fgenesh1_pm.21_#_70	scaffold_21	3469_1_CBOZ_CBPA		OSTLU_35655	MICPUN_59207		VOLCADRAFT_108909
[KO:K11129]	---	H/ACA ribonucleoprotein complex subunit 2	CHLREDRAFT_193640		H632_c774p0	contig-774	a8631r244		jgi|ChlNC64A_1|50158|fgenesh3_pg.C_scaffold_3000031	scaffold_3	CBPS_CBWC_CBWF_1126_1		jgi|Coc_C169_1|36917|fgenesh1_pm.10_#_5	scaffold_10	1903_1_CBOZ_CBPA	Ot13g00680	OSTLU_17769	MICPUN_76839	MICPUCDRAFT_26023	VOLCADRAFT_35939
[KO:K11130]	---	H/ACA ribonucleoprotein complex subunit 3	CHLREDRAFT_176419			contig-2225	a10131r202		jgi|ChlNC64A_1|15890|gw1.7.292.1	scaffold_7			jgi|Coc_C169_1|18026|e_gw1.13.298.1	scaffold_13	2198_1_CBOZ_CBPA	Ot05g00680	OSTLU_31537	MICPUN_86098	MICPUCDRAFT_59249	VOLCADRAFT_100644
[KO:K11131]	5.4.99.-	H/ACA ribonucleoprotein complex subunit 4	CHLREDRAFT_99415		H632_c1661p0	contig-1661	a4790r355		jgi|ChlNC64A_1|37238|estExt_Genewise1Plus.C_260166	scaffold_26	CBPS_CBWC_CBWF_493_0_CBWC7794.b1		jgi|Coc_C169_1|38013|fgenesh1_pm.17_#_42	scaffold_17	3874_1_CBOZ_CBPA	Ot02g00870	OSTLU_30197	MICPUN_107404	MICPUCDRAFT_34321	VOLCADRAFT_79364
[KO:K12618]	3.1.13.-	5'-3' exoribonuclease 1	CHLREDRAFT_95232		H632_c2879p0	contig-2879	a6300r491		jgi|ChlNC64A_1|21054|e_gw1.5.672.1	scaffold_12			jgi|Coc_C169_1|36202|fgenesh1_pm.6_#_50	scaffold_6		Ot06g03610, Ot17g02470	OSTLU_18607, 41082	MICPUN_100794	MICPUCDRAFT_21065	VOLCADRAFT_115887
[KO:K13288]	3.1.-.-	oligoribonuclease	CHLREDRAFT_96755		H632_c901p0	contig-901	a11670r469		jgi|ChlNC64A_1|12090|gw1.4.295.1	scaffold_4			jgi|Coc_C169_1|13295|e_gw1.4.749.1	scaffold_4						VOLCADRAFT_66302
[KO:K14290]	---	exportin-1	CHLREDRAFT_138199		H632_c527p0	contig-527	a3483r573		jgi|ChlNC64A_1|56301|estExt_fgenesh3_pm.C_210001	scaffold_21	CBPS_CBWC_CBWF_3522_0_CBWC5478.b1		jgi|Coc_C169_1|37138|fgenesh1_pm.11_#_35	scaffold_11	3051_1_CBOZ_CBPA	Ot02g05880	OSTLU_29941	MICPUN_106897	MICPUCDRAFT_32552	VOLCADRAFT_82881
[KO:K14521]	2.3.1.-	N-acetyltransferase 10	CHLREDRAFT_137045		H632_c1842p0	contig-1842	a99966r36		jgi|ChlNC64A_1|6355|gw1.6.2.1	scaffold_6			jgi|Coc_C169_1|54801|estExt_fgenesh1_pm.C_210021	scaffold_21	2914_1_CBOZ_CBPA	Ot05g03530	OSTLU_38443	MICPUN_102725	MICPUCDRAFT_56289	VOLCADRAFT_98273
[KO:K14535]	2.7.4.3	transcription initiation factor TFIID subunit 9 / adenylate kinase	CHLREDRAFT_182007		H632_c294p1	contig-294	a26041r69		jgi|ChlNC64A_1|22432|e_gw1.8.282.1	scaffold_8			jgi|Coc_C169_1|8547|gw1.10.443.1	scaffold_10		Ot03g05440	OSTLU_8345	MICPUN_77463	MICPUCDRAFT_13464	VOLCADRAFT_63953
[KO:K14537]	---	nuclear GTP-binding protein	CHLREDRAFT_128793		H632_c3577p0	contig-3834	a61614r59		jgi|ChlNC64A_1|134718|IGS.gm_12_00104	scaffold_12	CBPS_CBWC_CBWF_341_1		jgi|Coc_C169_1|3077|gw1.1.262.1	scaffold_1		Ot08g02140	OSTLU_42327	MICPUN_81269	MICPUCDRAFT_16708	VOLCADRAFT_81595
[KO:K14538]	---	nuclear GTP-binding protein	CHLREDRAFT_116921		H632_c1p3	contig-1	a6177r309		jgi|ChlNC64A_1|36783|estExt_Genewise1Plus.C_210116	scaffold_21	CBPS_CBWC_CBWF_0_0_CBWC2865.b1		jgi|Coc_C169_1|4224|gw1.7.215.1	scaffold_7		Ot06g02000	OSTLU_34264	MICPUN_93149	MICPUCDRAFT_49418	VOLCADRAFT_42065
[KO:K14539]	3.6.1.-	large subunit GTPase 1	CHLREDRAFT_206017		H632_c2348p0	contig-2348	a8591r234		jgi|ChlNC64A_1|54702|fgenesh3_pg.C_scaffold_24000086	scaffold_24	CBPS_CBWC_CBWF_341_1		jgi|Coc_C169_1|39578|fgenesh1_pg.2_#_190	scaffold_2		Ot14g01290	OSTLU_2179	MICPUN_66874	MICPUCDRAFT_22559	VOLCADRAFT_105489
[KO:K14544]	---	U3 small nucleolar RNA-associated protein 22	CHLREDRAFT_144312		H632_c1970p0		a3207r468		jgi|ChlNC64A_1|140463|IGS.gm_3_00202	scaffold_3	CBPS_CBWC_CBWF_1009_0_CBWC3941.b1		jgi|Coc_C169_1|41615|fgenesh1_pg.7_#_19	scaffold_7		Ot07g03900	OSTLU_16259	MICPUN_65408	MICPUCDRAFT_50246	VOLCADRAFT_105649, 93423
[KO:K14546]	---	U3 small nucleolar RNA-associated protein 5	CHLREDRAFT_147090								CBPS_CBWC_CBWF_1439_1		jgi|Coc_C169_1|44979|fgenesh1_pg.21_#_4	scaffold_21	4362_1_CBOZ_CBPA	Ot08g03020	OSTLU_93153	MICPUN_60767	MICPUCDRAFT_58229	VOLCADRAFT_104876
[KO:K14549]	---	U3 small nucleolar RNA-associated protein 15	CHLREDRAFT_117285		H632_c1316p0	contig-1316	a35224r118		jgi|ChlNC64A_1|59126|estExt_fgenesh3_pg.C_260055	scaffold_26	CBPS_CBWC_CBWF_1439_1		jgi|Coc_C169_1|36515|fgenesh1_pm.7_#_131	scaffold_7	3404_1_CBOZ_CBPA	Ot15g01310	OSTLU_2239	MICPUN_108508	MICPUCDRAFT_67965	VOLCADRAFT_66565
[KO:K14550]	---	U3 small nucleolar RNA-associated protein 10	CHLREDRAFT_190833			contig-1692	a16197r64		jgi|ChlNC64A_1|139049|IGS.gm_23_00040	scaffold_23	CBPS_CBWC_CBWF_44_2		jgi|Coc_C169_1|59034|Genemark1.996_g	scaffold_2	4235_1_CBOZ_CBPA	Ot08g00770		MICPUN_57945	MICPUCDRAFT_58070	VOLCADRAFT_107183
[KO:K14553]	---	U3 small nucleolar RNA-associated protein 18	CHLREDRAFT_98108			contig-2221	a101949r40		jgi|ChlNC64A_1|7655|gw1.16.51.1	scaffold_16	CBPS_CBWC_CBWF_3316_0_CBWC2277.g1		jgi|Coc_C169_1|16036|e_gw1.9.136.1	scaffold_9		Ot02g00550	OSTLU_119571	MICPUN_113286	MICPUCDRAFT_70806	VOLCADRAFT_78723
[KO:K14554]	---	U3 small nucleolar RNA-associated protein 21	CHLREDRAFT_187813		H632_c718p0	contig-3872	a39270r61		jgi|ChlNC64A_1|33926|estExt_Genewise1Plus.C_20519	scaffold_2	CBPS_CBWC_CBWF_541_2		jgi|Coc_C169_1|10072|gw1.11.327.1	scaffold_11	3610_1_CBOZ_CBPA	Ot17g00310	OSTLU_37792	MICPUN_98006	MICPUCDRAFT_53769	VOLCADRAFT_59899
[KO:K14555]	---	U3 small nucleolar RNA-associated protein 13	CHLREDRAFT_101305		H632_c487p0	contig-487	a32772r92		jgi|ChlNC64A_1|55084|fgenesh3_pg.C_scaffold_29000036	scaffold_29	CBPS_CBWC_CBWF_3152_1		jgi|Coc_C169_1|847|gw1.4.63.1	scaffold_4	3365_2_CBOZ_CBPA	Ot08g01390	OSTLU_42847	MICPUN_83206	MICPUCDRAFT_518	VOLCADRAFT_70607
[KO:K14556]	---	U3 small nucleolar RNA-associated protein 12	CHLREDRAFT_127955		H632_c1746p0	contig-1746	a41486r67		jgi|ChlNC64A_1|135545|IGS.gm_14_00078	scaffold_14	CBPS_CBWC_CBWF_3934_0_CBWF5881.g1		jgi|Coc_C169_1|43469|fgenesh1_pg.13_#_112	scaffold_13	4219_1_CBOZ_CBPA	Ot14g00880	OSTLU_311	MICPUN_65501	MICPUCDRAFT_18664	VOLCADRAFT_79148
[KO:K14557]	---	U3 small nucleolar RNA-associated protein 6	CHLREDRAFT_144177		H632_c4840p0	contig-4840	a57615r59		jgi|ChlNC64A_1|52806|fgenesh3_pg.C_scaffold_12000131	scaffold_12			jgi|Coc_C169_1|1918|gw1.1.184.1	scaffold_1		Ot02g02010	OSTLU_119550	MICPUN_107353	MICPUCDRAFT_55453	VOLCADRAFT_102982
[KO:K14558]	---	periodic tryptophan protein 2	CHLREDRAFT_195954		H632_c1526p0	contig-5640	a101713r37		jgi|ChlNC64A_1|6542|gw1.5.21.1	scaffold_5	CBPS_CBWC_CBWF_2368_1		jgi|Coc_C169_1|38298|fgenesh1_pm.19_#_120	scaffold_19	4219_1_CBOZ_CBPA	Ot02g04600	OSTLU_8348	MICPUN_107413	MICPUCDRAFT_34306	VOLCADRAFT_68766
[KO:K14559]	---	U3 small nucleolar RNA-associated protein MPP10	CHLREDRAFT_153629				a66627r61		jgi|ChlNC64A_1|142905|IGS.gm_5_00234	scaffold_5	CBPS_CBWC_CBWF_811_1		jgi|Coc_C169_1|8295|gw1.15.202.1	scaffold_15			OSTLU_31612	MICPUN_113197	MICPUCDRAFT_70680	VOLCADRAFT_88196
[KO:K14560]	---	U3 small nucleolar ribonucleoprotein protein IMP3	CHLREDRAFT_182824		H632_c521p0	contig-521	a43546r137		jgi|ChlNC64A_1|17623|gw1.25.183.1	scaffold_25	CBPS_CBWC_CBWF_2152_1		jgi|Coc_C169_1|36555|fgenesh1_pm.7_#_171	scaffold_7		Ot14g00710	OSTLU_29359	MICPUN_109412	MICPUCDRAFT_7899	VOLCADRAFT_76931
[KO:K14561]	---	U3 small nucleolar ribonucleoprotein protein IMP4	CHLREDRAFT_127225		H632_c377p1	contig-377	a20086r152		jgi|ChlNC64A_1|17267|gw1.8.439.1	scaffold_8			jgi|Coc_C169_1|35288|fgenesh1_pm.2_#_298	scaffold_2	690_1_CBOZ_CBPA	Ot14g00180	OSTLU_29310	MICPUN_87683	MICPUCDRAFT_22905	VOLCADRAFT_61433
[KO:K14563]	2.1.1.-	rRNA 2'-O-methyltransferase fibrillarin	CHLREDRAFT_186463		H632_c1570p0	contig-1570	a4964r831		jgi|ChlNC64A_1|30274|estExt_Genewise1.C_50067	scaffold_5	CBPS_CBWC_CBWF_2157_1		jgi|Coc_C169_1|58980|Genemark1.942_g	scaffold_2	237_1_CBOZ_CBPA	Ot07g01070	OSTLU_32524	MICPUN_97046	MICPUCDRAFT_61688	VOLCADRAFT_109131
[KO:K14564]	---	nucleolar protein 56	CHLREDRAFT_131406		H632_c861p1	contig-861	a5703r493		jgi|ChlNC64A_1|35365|estExt_Genewise1Plus.C_90356	scaffold_9	CBPS_CBWC_CBWF_1071_1		jgi|Coc_C169_1|37481|fgenesh1_pm.13_#_49	scaffold_13	4187_1_CBOZ_CBPA	Ot08g00450, Ot08g00460	OSTLU_50302	MICPUN_59549	MICPUCDRAFT_33398	VOLCADRAFT_105910
[KO:K14565]	---	nucleolar protein 58	CHLREDRAFT_127930		H632_c55p1	contig-55	a557r1209		jgi|ChlNC64A_1|48597|fgenesh3_pm.C_scaffold_4000032	scaffold_4	CBPS_CBWC_CBWF_1071_1		jgi|Coc_C169_1|13569|e_gw1.4.227.1	scaffold_4	2719_0_CBOZ7115.b1_CBOZ_CBPA	Ot03g00640	OSTLU_30396	MICPUN_55519	MICPUCDRAFT_31874	VOLCADRAFT_102990
[KO:K14566]	---	U3 small nucleolar RNA-associated protein 24	CHLREDRAFT_118742		H632_c1101p0	contig-1101	a24840r177		jgi|ChlNC64A_1|48459|fgenesh3_pm.C_scaffold_2000014	scaffold_2			jgi|Coc_C169_1|20481|e_gw1.22.161.1	scaffold_22	0_0_CBPA1668.b1_CBOZ_CBPA	Ot06g02330	OSTLU_15766	MICPUN_78885	MICPUCDRAFT_44763	VOLCADRAFT_109032
[KO:K14567]	---	U3 small nucleolar RNA-associated protein 14	CHLREDRAFT_176639		H632_c4841p1	contig-4841	a59698r66		jgi|ChlNC64A_1|51602|fgenesh3_pg.C_scaffold_7000149				jgi|Coc_C169_1|19326|e_gw1.18.82.1	scaffold_18	4141_1_CBOZ_CBPA	Ot04g00890	OSTLU_31001	MICPUN_102467	MICPUCDRAFT_43608	VOLCADRAFT_121361
[KO:K14568]	2.1.1.260	rRNA small subunit pseudouridine methyltransferase Nep1	CHLREDRAFT_178371		H632_c95p4	contig-95	a22381r119		jgi|ChlNC64A_1|134291|IGS.gm_11_00137	scaffold_11			jgi|Coc_C169_1|37252|fgenesh1_pm.11_#_149	scaffold_11		Ot18g01810	OSTLU_39810	MICPUN_77569	MICPUCDRAFT_49493	VOLCADRAFT_106743
[KO:K14569]	---	ribosome biogenesis protein BMS1	CHLREDRAFT_113591		H632_c588p1	contig-588	a63248r45		jgi|ChlNC64A_1|21185|e_gw1.5.680.1	scaffold_5	CBPS_CBWC_CBWF_2290_1		jgi|Coc_C169_1|82|gw1.15.2.1	scaffold_15	2121_1_CBOZ_CBPA	Ot12g02110	OSTLU_39301	MICPUN_65205	MICPUCDRAFT_30726	VOLCADRAFT_62777
[KO:K14571]	---	ribosome biogenesis ATPase	CHLREDRAFT_38371		H632_c129p0	contig-129	a19923r71		jgi|ChlNC64A_1|140589|IGS.gm_3_00328	scaffold_38	CBPS_CBWC_CBWF_1128_1		jgi|Coc_C169_1|1721|gw1.5.120.1	scaffold_5	1757_1_CBOZ_CBPA	Ot17g01960	OSTLU_37691	MICPUN_79795	MICPUCDRAFT_33829	VOLCADRAFT_105558
[KO:K14572]	---	midasin	CHLREDRAFT_169185		H632_c977p0	contig-977	a14920r142		jgi|ChlNC64A_1|133427|IGS.gm_1_00563	scaffold_1			jgi|Coc_C169_1|5|gw1.3.1.1	scaffold_3	2963_1_CBOZ_CBPA	Ot01g04040	OSTLU_40957	MICPUN_65101, 76243	MICPUCDRAFT_21219	VOLCADRAFT_121252
[KO:K14573]	---	nucleolar protein 4	CHLREDRAFT_186870		H632_c206p2	contig-206	a13522r114		jgi|ChlNC64A_1|134820|IGS.gm_12_00206	scaffold_12	CBPS_CBWC_CBWF_8_0_CBWF7472.g1		jgi|Coc_C169_1|39076|fgenesh1_pg.1_#_269	scaffold_1	0_0_CBOZ1827.b1_CBOZ_CBPA	Ot10g03005	OSTLU_26255	MICPUN_101277	MICPUCDRAFT_1653	VOLCADRAFT_87629
[KO:K14574]	---	ribosome maturation protein SDO1	CHLREDRAFT_102075		H632_c3135p0	contig-3135	a3261r398		jgi|ChlNC64A_1|11856|gw1.1.377.1	scaffold_1			jgi|Coc_C169_1|7545|gw1.2.599.1	scaffold_2			OSTLU_5118	MICPUN_81292	MICPUCDRAFT_18039	VOLCADRAFT_83724
[KO:K14575]	---	AAA family ATPase	CHLREDRAFT_120247		H632_c1908p0	contig-1908	a14854r188		jgi|ChlNC64A_1|7197|gw1.38.6.1	scaffold_38	CBPS_CBWC_CBWF_1128_1		jgi|Coc_C169_1|37104|fgenesh1_pm.11_#_1	scaffold_3	1757_1_CBOZ_CBPA
03010_Ribosome
[KO:K02864]	---	large subunit ribosomal protein L10	CHLREDRAFT_126960			contig-300	a36509r93		jgi|ChlNC64A_1|140558|IGS.gm_3_00297	scaffold_3	CBPS_CBWC_CBWF_2070_1		jgi|Coc_C169_1|44442|fgenesh1_pg.18_#_44	scaffold_18			OSTLU_36113		MICPUCDRAFT_65007	VOLCADRAFT_102827
[KO:K02865]	---	large subunit ribosomal protein L10Ae	CHLREDRAFT_195585		H632_c546p0	contig-546	a34r8581		jgi|ChlNC64A_1|48602|fgenesh3_pm.C_scaffold_4000037	scaffold_4	CBPS_CBWC_CBWF_182_1		jgi|Coc_C169_1|35750|fgenesh1_pm.4_#_152	scaffold_4	246_1_CBOZ_CBPA		OSTLU_45590	MICPUN_95416	MICPUCDRAFT_49658	VOLCADRAFT_109777
[KO:K02866]	---	large subunit ribosomal protein L10e	CHLREDRAFT_195584		H632_c1429p0	contig-1429	a957r2907		jgi|ChlNC64A_1|49178|fgenesh3_pm.C_scaffold_26000024	scaffold_26	CBPS_CBWC_CBWF_8_46		jgi|Coc_C169_1|36612|fgenesh1_pm.8_#_12	scaffold_8		Ot03g04190	OSTLU_30754	MICPUN_93045	MICPUCDRAFT_24102	VOLCADRAFT_76448
[KO:K02867]	---	large subunit ribosomal protein L11	CHLREDRAFT_184822		H632_c1115p1	contig-1115	a5978r520		jgi|ChlNC64A_1|48827|fgenesh3_pm.C_scaffold_11000004	scaffold_11	CBPS_CBWC_CBWF_1794_1		jgi|Coc_C169_1|13772|e_gw1.4.784.1	scaffold_4	2126_1_CBOZ_CBPA	Ot02g07570, Ot14g01230	OSTLU_13461, 30315	MICPUN_113168, 92304	MICPUCDRAFT_29915, 70704	VOLCADRAFT_72309
[KO:K02868]	---	large subunit ribosomal protein L11e	CHLREDRAFT_195587		H632_c370p1	contig-370	a1171r2862		jgi|ChlNC64A_1|35631|estExt_Genewise1Plus.C_110319	scaffold_11	CBPS_CBWC_CBWF_1738_1		jgi|Coc_C169_1|8490|gw1.8.373.1	scaffold_8	228_1_CBOZ_CBPA		OSTLU_30777	MICPUN_89807	MICPUCDRAFT_24004	VOLCADRAFT_106793
[KO:K02870]	---	large subunit ribosomal protein L12e	CHLREDRAFT_138697		H632_c48p1	contig-48	a408r3193		jgi|ChlNC64A_1|35074|estExt_Genewise1Plus.C_80066	scaffold_8	CBPS_CBWC_CBWF_1868_1		jgi|Coc_C169_1|38760|fgenesh1_pm.27_#_16	scaffold_27	278_1_CBOZ_CBPA	Ot03g05340	OSTLU_34409	MICPUN_106714	MICPUCDRAFT_30629	VOLCADRAFT_82216
[KO:K02871]	---	large subunit ribosomal protein L13	CHLREDRAFT_185004, 195619		H632_c1409p0, c1426p0	contig-1409, 1426	a16290r276, a295481r11		jgi|ChlNC64A_1|140430|IGS.gm_3_00169, |56148|estExt_fgenesh3_pm.C_90025	scaffold_3, 9	CBPS_CBWC_CBWF_2692_1		jgi|Coc_C169_1|35211|fgenesh1_pm.2_#_221, |44422|fgenesh1_pg.18_#_24	scaffold_2, 18	1218_1_, 2414_1_CBOZ_CBPA	Ot06g01150	OSTLU_15678, 8159	MICPUN_74025, 97280	MICPUCDRAFT_27251, 7563	VOLCADRAFT_121737, 78780
[KO:K02872]	---	large subunit ribosomal protein L13Ae	CHLREDRAFT_162845		H632_c285p2	contig-285	a2033r1817		jgi|ChlNC64A_1|48178|fgenesh3_kg.C_scaffold_5000022	scaffold_5	CBPS_CBWC_CBWF_969_1		jgi|Coc_C169_1|8176|gw1.19.271.1	scaffold_19	418_1_CBOZ_CBPA		OSTLU_26899	MICPUN_93104	MICPUCDRAFT_30605	VOLCADRAFT_75696
[KO:K02873]	---	large subunit ribosomal protein L13e	CHLREDRAFT_129809		H632_c112p0	contig-112	a2840r657		jgi|ChlNC64A_1|48350|fgenesh3_kg.C_scaffold_29000001	scaffold_29	CBPS_CBWC_CBWF_8_75		jgi|Coc_C169_1|10763|gw1.11.392.1	scaffold_11	556_1_CBOZ_CBPA		OSTLU_15603	MICPUN_90780	MICPUCDRAFT_62462	VOLCADRAFT_105571
[KO:K02875]	---	large subunit ribosomal protein L14e	CHLREDRAFT_145271		H632_c115p2	contig-115	a1502r2395		jgi|ChlNC64A_1|14358|gw1.1.538.1	scaffold_1	CBPS_CBWC_CBWF_2643_1		jgi|Coc_C169_1|35506|fgenesh1_pm.3_#_181	scaffold_3	234_1_CBOZ_CBPA		OSTLU_9318	MICPUN_53957	MICPUCDRAFT_28876	VOLCADRAFT_59625
[KO:K02876]	---	large subunit ribosomal protein L15	CHLREDRAFT_192847, 195635		H632_c1191p1	contig-690	a13610r106, a23819r94		jgi|ChlNC64A_1|144493|IGS.gm_7_00435, |143546|IGS.gm_6_00120	scaffold_6	CBPS_CBWC_CBWF_1945_1		jgi|Coc_C169_1|7993|gw1.18.221.1, |7596|gw1.7.324.1	scaffold_7	287_1_CBOZ_CBPA	Ot17g02520, Ot18g00700	OSTLU_28191, 28269	MICPUN_52392, 58963	MICPUCDRAFT_54359, 7632	VOLCADRAFT_109530, 95820
[KO:K02877]	---	large subunit ribosomal protein L15e	CHLREDRAFT_76376		H632_c2170p0	contig-2170	a1876r643		jgi|ChlNC64A_1|48285|fgenesh3_kg.C_scaffold_18000005	scaffold_18	CBPS_CBWC_CBWF_1835_1		jgi|Coc_C169_1|37356|fgenesh1_pm.12_#_99	scaffold_12	90_1_CBOZ_CBPA	Ot02g06810	OSTLU_14085	MICPUN_55312	MICPUCDRAFT_31849	VOLCADRAFT_108876
[KO:K02879]	---	large subunit ribosomal protein L17	CHLREDRAFT_108312, 195620		H632_c937p0	contig-937, 4	a14137r299, a49281r69		jgi|ChlNC64A_1|17719|gw1.5.676.1, |25323|e_gw1.15.277.1	scaffold_5, 15	CBPS_CBWC_CBWF_2928_1		jgi|Coc_C169_1|10859|gw1.14.377.1, |19321|e_gw1.18.252.1	scaffold_14, 18	1843_1_CBOZ_CBPA	Ot01g05870	OSTLU_29223	MICPUN_109019, 56896	MICPUCDRAFT_29418, 8751	VOLCADRAFT_106362, 72886
[KO:K02880]	---	large subunit ribosomal protein L17e	CHLREDRAFT_77517		H632_c616p1	contig-616	a1434r1837		jgi|ChlNC64A_1|48143|fgenesh3_kg.C_scaffold_4000011	scaffold_4	CBPS_CBWC_CBWF_544_1		jgi|Coc_C169_1|8453|gw1.11.262.1	scaffold_11	2081_1_CBOZ_CBPA	Ot06g03260	OSTLU_32234	MICPUN_93345	MICPUCDRAFT_49699	VOLCADRAFT_85333
[KO:K02881]	---	large subunit ribosomal protein L18	CHLREDRAFT_196265			contig-1945	a27663r111		jgi|ChlNC64A_1|20418|e_gw1.4.432.1	scaffold_4			jgi|Coc_C169_1|35732|fgenesh1_pm.4_#_134	scaffold_4	1385_1_CBOZ_CBPA		OSTLU_16290	MICPUN_59217	MICPUCDRAFT_28274	VOLCADRAFT_103908
[KO:K02882]	---	large subunit ribosomal protein L18Ae	CHLREDRAFT_146844		H632_c557p2	contig-557	a2303r2007		jgi|ChlNC64A_1|145351|IGS.gm_9_00158	scaffold_9	CBPS_CBWC_CBWF_700_1		jgi|Coc_C169_1|55721|Genemark1.665_g	scaffold_1		Ot07g00180	OSTLU_32420	MICPUN_57540	MICPUCDRAFT_49713	VOLCADRAFT_80281
[KO:K02883]	---	large subunit ribosomal protein L18e	CHLREDRAFT_195589		H632_c955p1	contig-955	a2168r1133		jgi|ChlNC64A_1|49215|fgenesh3_pm.C_scaffold_28000015	scaffold_28	CBPS_CBWC_CBWF_639_1		jgi|Coc_C169_1|38342|fgenesh1_pm.20_#_34	scaffold_20	1256_1_CBOZ_CBPA	Ot09g03150	OSTLU_33583	MICPUN_64167	MICPUCDRAFT_25478	VOLCADRAFT_80103
[KO:K02885]	---	large subunit ribosomal protein L19e	CHLREDRAFT_195590		H632_c1530p0	contig-1530	a576r3012		jgi|ChlNC64A_1|48362|fgenesh3_kg.C_scaffold_32000001	scaffold_32	CBPS_CBWC_CBWF_619_0_CBWF1161.b1		jgi|Coc_C169_1|37643|fgenesh1_pm.14_#_77	scaffold_14	615_1_CBOZ_CBPA	Ot07g03420	OSTLU_119482	MICPUN_112659	MICPUCDRAFT_49436	VOLCADRAFT_81642
[KO:K02887]	---	large subunit ribosomal protein L20	CHLREDRAFT_101876			contig-2404	a14770r375		jgi|ChlNC64A_1|136924|IGS.gm_18_00030	scaffold_18			jgi|Coc_C169_1|37404|fgenesh1_pm.12_#_147	scaffold_12	0_0_CBPA4924.b1_CBOZ_CBPA			MICPUN_87780	MICPUCDRAFT_18764	VOLCADRAFT_80200
[KO:K02888]	---	large subunit ribosomal protein L21	CHLREDRAFT_148198		H632_c505p0	contig-505	a18609r179		jgi|ChlNC64A_1|140197|IGS.gm_29_00077	scaffold_29			jgi|Coc_C169_1|61729|Genemark1.2519_g			Ot01g04320	OSTLU_29064	MICPUN_113419	MICPUCDRAFT_51973	VOLCADRAFT_107158
[KO:K02889]	---	large subunit ribosomal protein L21e	CHLREDRAFT_24354		H632_c5400p0	contig-5400	a1806r1385		jgi|ChlNC64A_1|52871|fgenesh3_pg.C_scaffold_12000196	scaffold_12	CBPS_CBWC_CBWF_1482_1		jgi|Coc_C169_1|34970|fgenesh1_pm.1_#_311	scaffold_1	897_1_CBOZ_CBPA	Ot16g01750	OSTLU_27810	MICPUN_95995	MICPUCDRAFT_49736	VOLCADRAFT_72356
[KO:K02891]	---	large subunit ribosomal protein L22e	CHLREDRAFT_195131		H632_c1760p0	contig-1760	a828r3910		jgi|ChlNC64A_1|14509|gw1.15.213.1	scaffold_15	CBPS_CBWC_CBWF_2142_1		jgi|Coc_C169_1|35492|fgenesh1_pm.3_#_167	scaffold_3	349_1_CBOZ_CBPA	Ot12g02950	OSTLU_9463	MICPUN_90144	MICPUCDRAFT_31192	VOLCADRAFT_67685
[KO:K02893]	---	large subunit ribosomal protein L23Ae	CHLREDRAFT_174711		H632_c190p0	contig-190	a822r6150		jgi|ChlNC64A_1|14019|gw1.24.232.1	scaffold_24	CBPS_CBWC_CBWF_0_0_CBWF4669.g1		jgi|Coc_C169_1|37655|fgenesh1_pm.14_#_89	scaffold_14	1190_1_CBOZ_CBPA	Ot08g04030	OSTLU_16602	MICPUN_91476	MICPUCDRAFT_33613	VOLCADRAFT_78075
[KO:K02894]	---	large subunit ribosomal protein L23e	CHLREDRAFT_159282		H632_c761p2	contig-761	a4243r1346		jgi|ChlNC64A_1|20044|e_gw1.3.502.1	scaffold_3	CBPS_CBWC_CBWF_1826_1		jgi|Coc_C169_1|35159|fgenesh1_pm.2_#_169	scaffold_2	711_1_CBOZ_CBPA	Ot16g00500, Ot16g00510		MICPUN_90970	MICPUCDRAFT_37554	VOLCADRAFT_77611
[KO:K02895]	---	large subunit ribosomal protein L24	CHLREDRAFT_195622, 99818		H632_c73p2, c2295p1	contig-73, 2295	a14028r337, a2619r783		jgi|ChlNC64A_1|37194|estExt_Genewise1Plus.C_260087, |140340|IGS.gm_3_00079	scaffold_26, 3	CBPS_CBWC_CBWF_1175_1		jgi|Coc_C169_1|36156|fgenesh1_pm.6_#_4	scaffold_6, 2	1226_1_, 2630_1_CBOZ_CBPA	Ot11g00820	OSTLU_17263, 29904	MICPUN_106019, 109273	MICPUCDRAFT_18221, 37566	VOLCADRAFT_120913, 75290
[KO:K02896]	---	large subunit ribosomal protein L24e	CHLREDRAFT_195608, 83083		H632_c552p1, c1147p1	contig-552, 1147	a21r11192, a5226r598		jgi|ChlNC64A_1|48492|fgenesh3_pm.C_scaffold_2000047, |17720|gw1.2.688.1	scaffold_2	CBPS_CBWC_CBWF_703_1		jgi|Coc_C169_1|9007|gw1.16.356.1, |38518|fgenesh1_pm.22_#_21	scaffold_16, 22	1303_1_, 405_1_CBOZ_CBPA	Ot02g00330	OSTLU_119514, 43138	MICPUN_107328, 91602	MICPUCDRAFT_13718, 27633	VOLCADRAFT_103897, 85581
[KO:K02898]	---	large subunit ribosomal protein L26e	CHLREDRAFT_136811		H632_c1741p0	contig-1741	a769r3484		jgi|ChlNC64A_1|56417|estExt_fgenesh3_pm.C_370003	scaffold_37	CBPS_CBWC_CBWF_10_1		jgi|Coc_C169_1|37290|fgenesh1_pm.12_#_33	scaffold_12	632_1_CBOZ_CBPA		OSTLU_8655	MICPUN_91267	MICPUCDRAFT_30848	VOLCADRAFT_76074
[KO:K02899]	---	large subunit ribosomal protein L27	CHLREDRAFT_101404, 195636		H632_c306p1, c389p1	contig-306, 389	a44050r163, a358r1518		jgi|ChlNC64A_1|17758|gw1.4.635.1, |35897|estExt_Genewise1Plus.C_130039	scaffold_4, 13	CBPS_CBWC_CBWF_1477_1		jgi|Coc_C169_1|13670|e_gw1.4.837.1, |11618|e_gw1.1.804.1	scaffold_4, 1	680_1_CBOZ_CBPA			MICPUN_60174		VOLCADRAFT_74086
[KO:K02900]	---	large subunit ribosomal protein L27Ae	CHLREDRAFT_155455		H632_c1205p2	contig-1205	a3066r1649		jgi|ChlNC64A_1|133134|IGS.gm_1_00270	scaffold_1			jgi|Coc_C169_1|53241|estExt_fgenesh1_pm.C_60141	scaffold_6	105_1_CBOZ_CBPA		OSTLU_27402, 27472	MICPUN_94088	MICPUCDRAFT_26131	VOLCADRAFT_77145
[KO:K02901]	---	large subunit ribosomal protein L27e	CHLREDRAFT_260		H632_c107p1	contig-107	a1575r2800		jgi|ChlNC64A_1|56051|estExt_fgenesh3_pm.C_40043	scaffold_4	CBPS_CBWC_CBWF_0_0_CBPS3097.b1		jgi|Coc_C169_1|35843|fgenesh1_pm.4_#_245	scaffold_4	101_1_CBOZ_CBPA	Ot05g00200	OSTLU_31471	MICPUN_107054	MICPUCDRAFT_34421	VOLCADRAFT_74313
[KO:K02903]	---	large subunit ribosomal protein L28e	CHLREDRAFT_153674				a1235r1593		jgi|ChlNC64A_1|54075|fgenesh3_pg.C_scaffold_19000100	scaffold_19			jgi|Coc_C169_1|37971|fgenesh1_pm.16_#_136	scaffold_16	316_1_CBOZ_CBPA		OSTLU_26642	MICPUN_52633		VOLCADRAFT_110075
[KO:K02905]	---	large subunit ribosomal protein L29e	CHLREDRAFT_147472		H632_c6p6	contig-6	a2568r1676		jgi|ChlNC64A_1|139759|IGS.gm_26_00112		CBPS_CBWC_CBWF_8_0_CBWC5482.g1		jgi|Coc_C169_1|35845|fgenesh1_pm.4_#_247	scaffold_4	1652_1_CBOZ_CBPA		OSTLU_26572	MICPUN_87366	MICPUCDRAFT_35383	VOLCADRAFT_85396
[KO:K02906]	---	large subunit ribosomal protein L3	CHLREDRAFT_171607, 195623		H632_c2566p0	contig-2566	a36207r132, a28026r107		jgi|ChlNC64A_1|24054|e_gw1.12.224.1, |59213|estExt_fgenesh3_pg.C_290030	scaffold_12, 29	CBPS_CBWC_CBWF_2777_1		jgi|Coc_C169_1|7800|gw1.16.302.1, |13900|e_gw1.4.671.1	scaffold_16, 4	3938_0_CBOZ4976.g1_CBOZ_CBPA	Ot02g06970, Ot20g00340	OSTLU_36377, 6632	MICPUN_62670, 85577	MICPUCDRAFT_44548, 6446	VOLCADRAFT_75415, 83619
[KO:K02907]	---	large subunit ribosomal protein L30	CHLREDRAFT_122263			contig-162	a35965r159		jgi|ChlNC64A_1|145154|IGS.gm_8_00482	scaffold_8			jgi|Coc_C169_1|37639|fgenesh1_pm.14_#_73	scaffold_14	3883_1_CBOZ_CBPA	Ot07g03760	OSTLU_32791		MICPUCDRAFT_60697	VOLCADRAFT_79459
[KO:K02908]	---	large subunit ribosomal protein L30e	CHLREDRAFT_166012		H632_c94p4	contig-94	a1329r2425		jgi|ChlNC64A_1|27512|e_gw1.26.258.1	scaffold_26	CBPS_CBWC_CBWF_8_79		jgi|Coc_C169_1|44432|fgenesh1_pg.18_#_34	scaffold_18	245_1_CBOZ_CBPA		OSTLU_37627	MICPUN_94345	MICPUCDRAFT_49144	VOLCADRAFT_73734
[KO:K02910]	---	large subunit ribosomal protein L31e	CHLREDRAFT_78109		H632_c107p0	contig-107	a1212r3020		jgi|ChlNC64A_1|14869|gw1.4.444.1	scaffold_4	CBPS_CBWC_CBWF_2863_1		jgi|Coc_C169_1|35821|fgenesh1_pm.4_#_223	scaffold_4	1121_1_CBOZ_CBPA	Ot10g02020	OSTLU_17087	MICPUN_91199	MICPUCDRAFT_24390	VOLCADRAFT_103828
[KO:K02912]	---	large subunit ribosomal protein L32e	CHLREDRAFT_191758		H632_c801p0	contig-801	a776r2619		jgi|ChlNC64A_1|48835|fgenesh3_pm.C_scaffold_11000012	scaffold_11	CBPS_CBWC_CBWF_8_81		jgi|Coc_C169_1|34754|fgenesh1_pm.1_#_95	scaffold_1	720_1_CBOZ_CBPA		OSTLU_86947	MICPUN_91456	MICPUCDRAFT_49537	VOLCADRAFT_72833
[KO:K02913]	---	large subunit ribosomal protein L33	CHLREDRAFT_151596				a5462r938		jgi|ChlNC64A_1|19156|e_gw1.2.522.1					scaffold_14			OSTLU_29342	MICPUN_63827	MICPUCDRAFT_22604	VOLCADRAFT_75287
[KO:K02915]	---	large subunit ribosomal protein L34e	CHLREDRAFT_195595		H632_c3373p0		a709r3555		jgi|ChlNC64A_1|142351|IGS.gm_4_00492	scaffold_4	CBPS_CBWC_CBWF_2876_1		jgi|Coc_C169_1|37251|fgenesh1_pm.11_#_148	scaffold_11	205_1_CBOZ_CBPA	Ot04g04340	OSTLU_37383	MICPUN_86588	MICPUCDRAFT_9155	VOLCADRAFT_109734
[KO:K02916]	---	large subunit ribosomal protein L35	CHLREDRAFT_194331			contig-1716	a32725r172		jgi|ChlNC64A_1|133856|IGS.gm_10_00147	scaffold_10			jgi|Coc_C169_1|38295|fgenesh1_pm.19_#_117	scaffold_19	1862_1_CBOZ_CBPA	Ot02g02140	OSTLU_119658	MICPUN_56879	MICPUCDRAFT_64183	VOLCADRAFT_120932
[KO:K02917]	---	large subunit ribosomal protein L35Ae	CHLREDRAFT_127247		H632_c8p3	contig-8	a455r5293		jgi|ChlNC64A_1|48699|fgenesh3_pm.C_scaffold_6000023	scaffold_6	CBPS_CBWC_CBWF_2427_1		jgi|Coc_C169_1|38424|fgenesh1_pm.21_#_5	scaffold_21	220_1_CBOZ_CBPA		OSTLU_33191	MICPUN_108826	MICPUCDRAFT_58446	VOLCADRAFT_103447
[KO:K02918]	---	large subunit ribosomal protein L35e	CHLREDRAFT_147004		H632_c141p2	contig-141	a3323r2086		jgi|ChlNC64A_1|52203|fgenesh3_pg.C_scaffold_9000228				jgi|Coc_C169_1|36111|fgenesh1_pm.5_#_210	scaffold_5	56_1_CBOZ_CBPA		OSTLU_31613	MICPUN_107597	MICPUCDRAFT_49485	VOLCADRAFT_79206
[KO:K02920]	---	large subunit ribosomal protein L36e	CHLREDRAFT_195597		H632_c1399p0	contig-1399	a199r7622		jgi|ChlNC64A_1|48568|fgenesh3_pm.C_scaffold_4000003	scaffold_4			jgi|Coc_C169_1|35660|fgenesh1_pm.4_#_62	scaffold_4	104_1_CBOZ_CBPA	Ot02g01800	OSTLU_119615	MICPUN_114038	MICPUCDRAFT_31782	VOLCADRAFT_109213
[KO:K02921]	---	large subunit ribosomal protein L37Ae	CHLREDRAFT_126853		H632_c300p1	contig-300	a2338r2111		jgi|ChlNC64A_1|48537|fgenesh3_pm.C_scaffold_3000037	scaffold_3	CBPS_CBWC_CBWF_292_3		jgi|Coc_C169_1|9803|gw1.9.412.1	scaffold_9	218_1_CBOZ_CBPA	Ot15g00050	OSTLU_13231	MICPUN_92616	MICPUCDRAFT_28424	VOLCADRAFT_85711
[KO:K02922]	---	large subunit ribosomal protein L37e	CHLREDRAFT_126163		H632_c1600p0	contig-1600	a2005r2037		jgi|ChlNC64A_1|133342|IGS.gm_1_00478	scaffold_1			jgi|Coc_C169_1|36255|fgenesh1_pm.6_#_103	scaffold_6	1164_1_CBOZ_CBPA	Ot07g04050	OSTLU_32818	MICPUN_93506	MICPUCDRAFT_33223	VOLCADRAFT_76128
[KO:K02923]	---	large subunit ribosomal protein L38e	CHLREDRAFT_194928		H632_c2716p0	contig-2716	a695r933		jgi|ChlNC64A_1|143002|IGS.gm_5_00331	scaffold_5			jgi|Coc_C169_1|37593|fgenesh1_pm.14_#_27	scaffold_14		Ot11g02670	OSTLU_17408	MICPUN_63254	MICPUCDRAFT_51368	VOLCADRAFT_109950
[KO:K02924]	---	large subunit ribosomal protein L39e	CHLREDRAFT_130723		H632_c4909p0	contig-3246	a3192r966		jgi|ChlNC64A_1|142714|IGS.gm_5_00043				jgi|Coc_C169_1|36866|fgenesh1_pm.9_#_123		1220_1_CBOZ_CBPA		OSTLU_30656	MICPUN_56442	MICPUCDRAFT_37283	VOLCADRAFT_56741
[KO:K02925]	---	large subunit ribosomal protein L3e	CHLREDRAFT_126189		H632_c1250p1	contig-1250	a369r3382		jgi|ChlNC64A_1|57606|estExt_fgenesh3_pg.C_80083	scaffold_8	CBPS_CBWC_CBWF_110_3		jgi|Coc_C169_1|36982|fgenesh1_pm.10_#_70	scaffold_10	1300_1_CBOZ_CBPA	Ot01g00490	OSTLU_23838	MICPUN_89851	MICPUCDRAFT_31261	VOLCADRAFT_103864
[KO:K02926]	---	large subunit ribosomal protein L4	CHLREDRAFT_120057, 185040		H632_c1232p1	contig-1232	a13867r134, a4331r269		jgi|ChlNC64A_1|17230|gw1.4.596.1, |12099|gw1.19.133.1	scaffold_4, 19			jgi|Coc_C169_1|6519|gw1.17.129.1, |38034|fgenesh1_pm.17_#_63	scaffold_4, 17	3807_1_CBOZ_CBPA	Ot11g01780	OSTLU_17340, 40690	MICPUN_59033, 76320	MICPUCDRAFT_20384, 48008	VOLCADRAFT_77420, 99312
[KO:K02927]	---	large subunit ribosomal protein L40e	CHLREDRAFT_195594			contig-2724	a429r7358		jgi|ChlNC64A_1|48598|fgenesh3_pm.C_scaffold_4000033	scaffold_4	CBPS_CBWC_CBWF_1116_2		jgi|Coc_C169_1|35727|fgenesh1_pm.4_#_129	scaffold_3	25_1_CBOZ_CBPA		OSTLU_16428	MICPUN_82590	MICPUCDRAFT_17541
[KO:K02928]	---	large subunit ribosomal protein L41e	CHLREDRAFT_195610
[KO:K02929]	---	large subunit ribosomal protein L44e	CHLREDRAFT_128309		H632_c4819p0	contig-4819	a1106r2729		jgi|ChlNC64A_1|134811|IGS.gm_12_00197	scaffold_12			jgi|Coc_C169_1|38717|fgenesh1_pm.25_#_42	scaffold_25	1039_1_CBOZ_CBPA		OSTLU_28038	MICPUN_62094	MICPUCDRAFT_30148	VOLCADRAFT_79404
[KO:K02930]	---	large subunit ribosomal protein L4e	CHLREDRAFT_195598		H632_c2087p0	contig-2087	a1320r1450		jgi|ChlNC64A_1|59310|estExt_fgenesh3_pg.C_330020	scaffold_33	CBPS_CBWC_CBWF_8_49		jgi|Coc_C169_1|35425|fgenesh1_pm.3_#_100	scaffold_3	2097_1_CBOZ_CBPA	Ot16g01400	OSTLU_13310	MICPUN_96004	MICPUCDRAFT_45929	VOLCADRAFT_103563
[KO:K02932]	---	large subunit ribosomal protein L5e	CHLREDRAFT_183782		H632_c163p1	contig-163	a442r3917		jgi|ChlNC64A_1|48369|fgenesh3_kg.C_scaffold_35000001	scaffold_35	CBPS_CBWC_CBWF_241_1		jgi|Coc_C169_1|38406|fgenesh1_pm.20_#_98	scaffold_20	315_1_CBOZ_CBPA	Ot15g01160	OSTLU_27400, 51384	MICPUN_108173	MICPUCDRAFT_49536	VOLCADRAFT_109737
[KO:K02933]	---	large subunit ribosomal protein L6	CHLREDRAFT_184687		H632_c2254p0	contig-2254	a46113r70		jgi|ChlNC64A_1|48179|fgenesh3_kg.C_scaffold_6000001	scaffold_6	CBPS_CBWC_CBWF_2482_1		jgi|Coc_C169_1|26066|estExt_Genewise1.C_210013	scaffold_21	364_1_CBOZ_CBPA	Ot15g02260	OSTLU_27601	MICPUN_92039	MICPUCDRAFT_45705	VOLCADRAFT_74643
[KO:K02934]	---	large subunit ribosomal protein L6e	CHLREDRAFT_183518		H632_c485p0	contig-485	a4443r403		jgi|ChlNC64A_1|48697|fgenesh3_pm.C_scaffold_6000021	scaffold_6	CBPS_CBWC_CBWF_1455_1		jgi|Coc_C169_1|16004|e_gw1.8.338.1	scaffold_8	713_1_CBOZ_CBPA		OSTLU_94758	MICPUN_108678	MICPUCDRAFT_49628	VOLCADRAFT_83175
[KO:K02935]	---	large subunit ribosomal protein L7/L12	CHLREDRAFT_194556		H632_c94p0	contig-94	a1249r474		jgi|ChlNC64A_1|133731|IGS.gm_10_00022	scaffold_10			jgi|Coc_C169_1|8516|gw1.13.240.1	scaffold_13				MICPUN_59041		VOLCADRAFT_79164
[KO:K02936]	---	large subunit ribosomal protein L7Ae	CHLREDRAFT_195599		H632_c566p0	contig-566	a1404r2233		jgi|ChlNC64A_1|49285|fgenesh3_pm.C_scaffold_38000006	scaffold_38	CBPS_CBWC_CBWF_357_1		jgi|Coc_C169_1|35983|fgenesh1_pm.5_#_82	scaffold_5	874_1_CBOZ_CBPA	Ot02g04970	OSTLU_41276	MICPUN_107645	MICPUCDRAFT_51525	VOLCADRAFT_75780
[KO:K02937]	---	large subunit ribosomal protein L7e	CHLREDRAFT_206194		H632_c477p1	contig-477	a3987r1278		jgi|ChlNC64A_1|48347|fgenesh3_kg.C_scaffold_28000002	scaffold_28	CBPS_CBWC_CBWF_8_40		jgi|Coc_C169_1|7447|gw1.20.199.1	scaffold_20		Ot03g01550	OSTLU_30488	MICPUN_106801	MICPUCDRAFT_31664	VOLCADRAFT_81255
[KO:K02938]	---	large subunit ribosomal protein L8e	CHLREDRAFT_172406		H632_c1378p0	contig-1378	a310r3312		jgi|ChlNC64A_1|35108|estExt_Genewise1Plus.C_80147	scaffold_8	CBPS_CBWC_CBWF_8_61		jgi|Coc_C169_1|7083|gw1.10.379.1	scaffold_10	2819_1_CBOZ_CBPA	Ot04g01970	OSTLU_31116	MICPUN_95460	MICPUCDRAFT_49650	VOLCADRAFT_74803
[KO:K02939]	---	large subunit ribosomal protein L9	CHLREDRAFT_184123						jgi|ChlNC64A_1|49036|fgenesh3_pm.C_scaffold_18000019	scaffold_18	CBPS_CBWC_CBWF_1902_1		jgi|Coc_C169_1|37398|fgenesh1_pm.12_#_141	scaffold_12	300_1_CBOZ_CBPA		OSTLU_18094	MICPUN_108175, 62813	MICPUCDRAFT_56936, 59815	VOLCADRAFT_72629
[KO:K02940]	---	large subunit ribosomal protein L9e	CHLREDRAFT_139831		H632_c214p3	contig-214	a1474r2503		jgi|ChlNC64A_1|48628|fgenesh3_pm.C_scaffold_5000015	scaffold_5	CBPS_CBWC_CBWF_250_1		jgi|Coc_C169_1|8220|gw1.15.201.1	scaffold_15	746_1_CBOZ_CBPA	Ot04g01850	OSTLU_45591	MICPUN_106868	MICPUCDRAFT_32821	VOLCADRAFT_77293
[KO:K02941]	---	large subunit ribosomal protein LP0	CHLREDRAFT_164097		H632_c2720p0	contig-2720	a1767r1800		jgi|ChlNC64A_1|48595|fgenesh3_pm.C_scaffold_4000030	scaffold_4	CBPS_CBWC_CBWF_740_1		jgi|Coc_C169_1|35857|fgenesh1_pm.4_#_259	scaffold_4	760_1_CBOZ_CBPA		OSTLU_29307	MICPUN_92321	MICPUCDRAFT_48999	VOLCADRAFT_84328
[KO:K02942]	---	large subunit ribosomal protein LP1	CHLREDRAFT_82172		H632_c4210p0	contig-4210	a758r3265		jgi|ChlNC64A_1|133519|IGS.gm_1_00655	scaffold_1	CBPS_CBWC_CBWF_8_48		jgi|Coc_C169_1|36022|fgenesh1_pm.5_#_121	scaffold_5	1777_1_CBOZ_CBPA	Ot16g01860	OSTLU_40742	MICPUN_95986	MICPUCDRAFT_45938	VOLCADRAFT_103521
[KO:K02943]	---	large subunit ribosomal protein LP2	CHLREDRAFT_195600				a1526r856		jgi|ChlNC64A_1|51198|fgenesh3_pg.C_scaffold_6000012		CBPS_CBWC_CBWF_8_81		jgi|Coc_C169_1|44982|fgenesh1_pg.21_#_7	scaffold_21			OSTLU_27612	MICPUN_106274	MICPUCDRAFT_27895	VOLCADRAFT_120883
[KO:K02946]	---	small subunit ribosomal protein S10	CHLREDRAFT_195637		H632_c1361p1	contig-1124	a32776r125		jgi|ChlNC64A_1|15284|gw1.12.450.1	scaffold_12	CBPS_CBWC_CBWF_2973_1		jgi|Coc_C169_1|10944|gw1.3.686.1	scaffold_3	2904_1_CBOZ_CBPA					VOLCADRAFT_77457
[KO:K02947]	---	small subunit ribosomal protein S10e	CHLREDRAFT_149993		H632_c298p0	contig-298	a3126r471		jgi|ChlNC64A_1|49290|fgenesh3_pm.C_scaffold_38000011	scaffold_38			jgi|Coc_C169_1|20522|e_gw1.23.155.1	scaffold_23	1467_1_CBOZ_CBPA		OSTLU_28709	MICPUN_90249	MICPUCDRAFT_55703	VOLCADRAFT_121388
[KO:K02949]	---	small subunit ribosomal protein S11e	CHLREDRAFT_180130		H632_c1451p1	contig-1451	a686r4120		jgi|ChlNC64A_1|49293|fgenesh3_pm.C_scaffold_42000003	scaffold_42	CBPS_CBWC_CBWF_3123_1		jgi|Coc_C169_1|38553|fgenesh1_pm.22_#_56	scaffold_22	698_1_CBOZ_CBPA	Ot06g01700	OSTLU_32090	MICPUN_81184	MICPUCDRAFT_33883	VOLCADRAFT_108961
[KO:K02950]	---	small subunit ribosomal protein S12	CHLREDRAFT_130212			contig-348	a917567r6				CBPS_CBWC_CBWF_1718_1				539_1_CBOZ_CBPA					VOLCADRAFT_104738
[KO:K02951]	---	small subunit ribosomal protein S12e	CHLREDRAFT_159272		H632_c427p2	contig-427	a1063r1522		jgi|ChlNC64A_1|135382|IGS.gm_13_00310	scaffold_13			jgi|Coc_C169_1|16054|e_gw1.9.391.1	scaffold_9	586_1_CBOZ_CBPA		OSTLU_12596	MICPUN_80940	MICPUCDRAFT_49622	VOLCADRAFT_107705
[KO:K02952]	---	small subunit ribosomal protein S13	CHLREDRAFT_195627			contig-2268	a9276r179		jgi|ChlNC64A_1|36993|estExt_Genewise1Plus.C_240136	scaffold_24	CBPS_CBWC_CBWF_1645_2		jgi|Coc_C169_1|36279|fgenesh1_pm.6_#_127	scaffold_6	1401_1_CBOZ_CBPA	OstapMp05	OSTLU_9160	MICPUN_89270, mit62	MICPUCDRAFT_45129	VOLCADRAFT_121576
[KO:K02953]	---	small subunit ribosomal protein S13e	CHLREDRAFT_169450		H632_c2263p0	contig-2263	a2299r1844		jgi|ChlNC64A_1|48529|fgenesh3_pm.C_scaffold_3000029	scaffold_3	CBPS_CBWC_CBWF_24_1		jgi|Coc_C169_1|35055|fgenesh1_pm.2_#_65	scaffold_2	385_4_CBOZ_CBPA	Ot01g03120	OSTLU_40147	MICPUN_108906	MICPUCDRAFT_49744	VOLCADRAFT_77352
[KO:K02954]	---	small subunit ribosomal protein S14	CHLREDRAFT_81150													OstapCp48, OstapMp08		MICPUN_mit65		VOLCADRAFT_55863
[KO:K02955]	---	small subunit ribosomal protein S14e	CHLREDRAFT_24344		H632_c385p0	contig-385	a5456r737		jgi|ChlNC64A_1|35964|estExt_Genewise1Plus.C_130247	scaffold_13	CBPS_CBWC_CBWF_2347_1		jgi|Coc_C169_1|38036|fgenesh1_pm.17_#_65	scaffold_17	27_1_CBOZ_CBPA	Ot02g05650	OSTLU_29967	MICPUN_113929	MICPUCDRAFT_70746	VOLCADRAFT_77431
[KO:K02957]	---	small subunit ribosomal protein S15Ae	CHLREDRAFT_59755		H632_c2242p0	contig-2242	a250r1719		jgi|ChlNC64A_1|48641|fgenesh3_pm.C_scaffold_5000028	scaffold_5	CBPS_CBWC_CBWF_2745_1		jgi|Coc_C169_1|37766|fgenesh1_pm.15_#_42	scaffold_15	482_1_CBOZ_CBPA	Ot01g02370	OSTLU_40222	MICPUN_107532	MICPUCDRAFT_31862	VOLCADRAFT_56570
[KO:K02958]	---	small subunit ribosomal protein S15e	CHLREDRAFT_24289		H632_c685p0	contig-685	a1692r2117		jgi|ChlNC64A_1|48682|fgenesh3_pm.C_scaffold_6000006	scaffold_6			jgi|Coc_C169_1|38288|fgenesh1_pm.19_#_110	scaffold_19	1315_1_CBOZ_CBPA		OSTLU_39331	MICPUN_89585	MICPUCDRAFT_30685	VOLCADRAFT_120952
[KO:K02960]	---	small subunit ribosomal protein S16e	CHLREDRAFT_195606		H632_c2451p0	contig-2451	a130r4231		jgi|ChlNC64A_1|48867|fgenesh3_pm.C_scaffold_12000007	scaffold_12	CBPS_CBWC_CBWF_2341_1		jgi|Coc_C169_1|37197|fgenesh1_pm.11_#_94	scaffold_11	913_1_CBOZ_CBPA	Ot05g03930	OSTLU_31856	MICPUN_93705	MICPUCDRAFT_62402	VOLCADRAFT_109027
[KO:K02962]	---	small subunit ribosomal protein S17e	CHLREDRAFT_195601		H632_c165p0	contig-165	a3421r1876		jgi|ChlNC64A_1|48137|fgenesh3_kg.C_scaffold_4000005	scaffold_4	CBPS_CBWC_CBWF_2466_1		jgi|Coc_C169_1|35775|fgenesh1_pm.4_#_177	scaffold_4	970_1_CBOZ_CBPA	Ot04g05240	OSTLU_31424	MICPUN_76945	MICPUCDRAFT_34073	VOLCADRAFT_73466
[KO:K02964]	---	small subunit ribosomal protein S18e	CHLREDRAFT_155649		H632_c1684p0	contig-1684	a561r5099		jgi|ChlNC64A_1|48589|fgenesh3_pm.C_scaffold_4000024	scaffold_4	CBPS_CBWC_CBWF_1427_1		jgi|Coc_C169_1|32774|fgenesh1_kg.5_#_65_#_953_1_CBOZ_CBPA	scaffold_5	953_1_CBOZ_CBPA		OSTLU_29591	MICPUN_109369	MICPUCDRAFT_49747	VOLCADRAFT_61524, 78888
[KO:K02966]	---	small subunit ribosomal protein S19e	CHLREDRAFT_141798		H632_c2085p0	contig-2085	a1916r2156		jgi|ChlNC64A_1|143236|IGS.gm_5_00565	scaffold_5			jgi|Coc_C169_1|8924|gw1.14.283.1	scaffold_14	1743_1_CBOZ_CBPA		OSTLU_44019	MICPUN_107171	MICPUCDRAFT_49693	VOLCADRAFT_75391
[KO:K02968]	---	small subunit ribosomal protein S20	CHLREDRAFT_195630		H632_c1218p0	contig-1218	a93488r26		jgi|ChlNC64A_1|141918|IGS.gm_4_00059					scaffold_4	442_1_CBOZ_CBPA	Ot02g05530	OSTLU_9610	MICPUN_63880	MICPUCDRAFT_29322	VOLCADRAFT_106320
[KO:K02969]	---	small subunit ribosomal protein S20e	CHLREDRAFT_195592		H632_c1124p0	contig-1124	a2286r2179		jgi|ChlNC64A_1|35045|estExt_Genewise1Plus.C_70338	scaffold_7	CBPS_CBWC_CBWF_810_1		jgi|Coc_C169_1|9331|gw1.5.543.1	scaffold_13	1382_1_CBOZ_CBPA		OSTLU_30430	MICPUN_57744	MICPUCDRAFT_35904	VOLCADRAFT_109739, 74395
[KO:K02971]	---	small subunit ribosomal protein S21e	CHLREDRAFT_129742		H632_c2506p0	contig-2506	a2344r1466		jgi|ChlNC64A_1|33662|estExt_Genewise1Plus.C_10629	scaffold_1	CBPS_CBWC_CBWF_357_1		jgi|Coc_C169_1|37271|fgenesh1_pm.12_#_14	scaffold_12	590_1_CBOZ_CBPA		OSTLU_27816	MICPUN_109558	MICPUCDRAFT_45937	VOLCADRAFT_74597
[KO:K02973]	---	small subunit ribosomal protein S23e	CHLREDRAFT_205854		H632_c348p1	contig-348	a454r9600		jgi|ChlNC64A_1|48760|fgenesh3_pm.C_scaffold_8000031	scaffold_8	CBPS_CBWC_CBWF_1718_1		jgi|Coc_C169_1|35317|fgenesh1_pm.2_#_327	scaffold_2	539_1_CBOZ_CBPA	Ot06g02030	OSTLU_32119	MICPUN_89912	MICPUCDRAFT_48397	VOLCADRAFT_79846
[KO:K02974]	---	small subunit ribosomal protein S24e	CHLREDRAFT_143072		H632_c236p1	contig-236	a435r6345		jgi|ChlNC64A_1|35715|estExt_Genewise1Plus.C_120075	scaffold_12	CBPS_CBWC_CBWF_3039_1		jgi|Coc_C169_1|37175|fgenesh1_pm.11_#_72	scaffold_11	115_1_CBOZ_CBPA	Ot15g02080	OSTLU_42986	MICPUN_92037	MICPUCDRAFT_60015	VOLCADRAFT_81535
[KO:K02975]	---	small subunit ribosomal protein S25e	CHLREDRAFT_57302		H632_c94p3	contig-94	a240r7793		jgi|ChlNC64A_1|139689|IGS.gm_26_00042	scaffold_26	CBPS_CBWC_CBWF_1279_1		jgi|Coc_C169_1|9609|gw1.17.203.1	scaffold_17	717_1_CBOZ_CBPA	Ot12g01790	OSTLU_39313	MICPUN_82663	MICPUCDRAFT_28202	VOLCADRAFT_82071
[KO:K02976]	---	small subunit ribosomal protein S26e	CHLREDRAFT_46276		H632_c1616p0	contig-1616	a411r5728		jgi|ChlNC64A_1|14843|gw1.6.294.1	scaffold_6	CBPS_CBWC_CBWF_984_1		jgi|Coc_C169_1|11523|e_gw1.1.789.1	scaffold_1	392_1_CBOZ_CBPA		OSTLU_14364	MICPUN_61082	MICPUCDRAFT_27736	VOLCADRAFT_74244
[KO:K02977]	---	small subunit ribosomal protein S27Ae	CHLREDRAFT_142065		H632_c1121p0	contig-1121	a1049r1129		jgi|ChlNC64A_1|48072|fgenesh3_kg.C_scaffold_1000008	scaffold_1	CBPS_CBWC_CBWF_1116_2		jgi|Coc_C169_1|32988|fgenesh1_kg.6_#_111_#_620_1_CBOZ_CBPA	scaffold_6	620_1_CBOZ_CBPA		OSTLU_32483	MICPUN_90428	MICPUCDRAFT_51948	VOLCADRAFT_72486
[KO:K02978]	---	small subunit ribosomal protein S27e	CHLREDRAFT_150644, 386		H632_c164p2	contig-164	a980r4294		jgi|ChlNC64A_1|48218|fgenesh3_kg.C_scaffold_11000002	scaffold_11	CBPS_CBWC_CBWF_1223_1		jgi|Coc_C169_1|32330|fgenesh1_kg.2_#_215_#_1523_1_CBOZ_CBPA, |27356|estExt_Genewise1Plus.C_20782	scaffold_2	1523_1_CBOZ_CBPA	Ot16g00060	OSTLU_40438	MICPUN_108364	MICPUCDRAFT_28127	VOLCADRAFT_85510
[KO:K02979]	---	small subunit ribosomal protein S28e	CHLREDRAFT_144646		H632_c482p0	contig-482	a890r2351		jgi|ChlNC64A_1|139344|IGS.gm_24_00124	scaffold_24			jgi|Coc_C169_1|37607|fgenesh1_pm.14_#_41	scaffold_14	0_0_CBPA6696.b1_CBOZ_CBPA	Ot07g03500	OSTLU_119484	MICPUN_51733	MICPUCDRAFT_64637	VOLCADRAFT_57913
[KO:K02980]	---	small subunit ribosomal protein S29e	CHLREDRAFT_195607		H632_c401p2	contig-401	a1240r2080		jgi|ChlNC64A_1|37184|estExt_Genewise1Plus.C_260077	scaffold_26	CBPS_CBWC_CBWF_495_2		jgi|Coc_C169_1|33720|fgenesh1_kg.12_#_87_#_926_1_CBOZ_CBPA	scaffold_12	926_1_CBOZ_CBPA		OSTLU_42310	MICPUN_91099	MICPUCDRAFT_33459	VOLCADRAFT_74966
[KO:K02981]	---	small subunit ribosomal protein S2e	CHLREDRAFT_195602		H632_c591p1	contig-591	a2466r762		jgi|ChlNC64A_1|48265|fgenesh3_kg.C_scaffold_15000007	scaffold_15	CBPS_CBWC_CBWF_619_2		jgi|Coc_C169_1|34672|fgenesh1_pm.1_#_13	scaffold_1	937_1_CBOZ_CBPA	Ot17g01460	OSTLU_18532	MICPUN_90856	MICPUCDRAFT_49763	VOLCADRAFT_109242
[KO:K02983]	---	small subunit ribosomal protein S30e	CHLREDRAFT_132716				a516r5078		jgi|ChlNC64A_1|142204|IGS.gm_4_00345	scaffold_4	CBPS_CBWC_CBWF_351_0_CBWF2478.g1		jgi|Coc_C169_1|35891|fgenesh1_pm.4_#_293	scaffold_4	109_1_CBOZ_CBPA		OSTLU_32924			VOLCADRAFT_78308
[KO:K02984]	---	small subunit ribosomal protein S3Ae	CHLREDRAFT_168484		H632_c261p1	contig-261	a501r5208		jgi|ChlNC64A_1|54264|fgenesh3_pg.C_scaffold_20000137	scaffold_20	CBPS_CBWC_CBWF_270_2		jgi|Coc_C169_1|35529|fgenesh1_pm.3_#_204	scaffold_3	7_1_CBOZ_CBPA		OSTLU_28528	MICPUN_95475	MICPUCDRAFT_49648	VOLCADRAFT_109707
[KO:K02985]	---	small subunit ribosomal protein S3e	CHLREDRAFT_134051		H632_c2611p1	contig-2611	a374r3286		jgi|ChlNC64A_1|48340|fgenesh3_kg.C_scaffold_26000017	scaffold_26	CBPS_CBWC_CBWF_158_1		jgi|Coc_C169_1|7737|gw1.14.245.1	scaffold_14	795_1_CBOZ_CBPA	Ot04g01450, Ot04g01460	OSTLU_49305	MICPUN_91459	MICPUCDRAFT_26239
[KO:K02987]	---	small subunit ribosomal protein S4e	CHLREDRAFT_188837		H632_c691p0	contig-691	a529r2809		jgi|ChlNC64A_1|48594|fgenesh3_pm.C_scaffold_4000029	scaffold_4	CBPS_CBWC_CBWF_129_4		jgi|Coc_C169_1|35864|fgenesh1_pm.4_#_266	scaffold_4	758_1_CBOZ_CBPA		OSTLU_18526	MICPUN_90851	MICPUCDRAFT_36856	VOLCADRAFT_82986
[KO:K02989]	---	small subunit ribosomal protein S5e	CHLREDRAFT_191776		H632_c350p1	contig-350	a1368r3049		jgi|ChlNC64A_1|49189|fgenesh3_pm.C_scaffold_26000035	scaffold_26	CBPS_CBWC_CBWF_1868_1		jgi|Coc_C169_1|36157|fgenesh1_pm.6_#_5	scaffold_6	867_1_CBOZ_CBPA	Ot07g00060	OSTLU_12674	MICPUN_90425	MICPUCDRAFT_48485	VOLCADRAFT_120316
[KO:K02990]	---	small subunit ribosomal protein S6	CHLREDRAFT_194972		H632_c811p1	contig-811	a18009r150		jgi|ChlNC64A_1|144161|IGS.gm_7_00103	scaffold_7			jgi|Coc_C169_1|43565|fgenesh1_pg.13_#_208	scaffold_13			OSTLU_29158	MICPUN_106134
[KO:K02991]	---	small subunit ribosomal protein S6e	CHLREDRAFT_104348		H632_c1066p1	contig-1066	a149r4700		jgi|ChlNC64A_1|48200|fgenesh3_kg.C_scaffold_8000005	scaffold_8	CBPS_CBWC_CBWF_110_4		jgi|Coc_C169_1|36604|fgenesh1_pm.8_#_4	scaffold_8	1302_1_CBOZ_CBPA		OSTLU_7099	MICPUN_90125	MICPUCDRAFT_49409	VOLCADRAFT_127296
[KO:K02993]	---	small subunit ribosomal protein S7e	CHLREDRAFT_179706		H632_c768p1	contig-768	a279r1861		jgi|ChlNC64A_1|49207|fgenesh3_pm.C_scaffold_28000007	scaffold_28	CBPS_CBWC_CBWF_1671_1		jgi|Coc_C169_1|8179|gw1.20.222.1	scaffold_20	3937_1_CBOZ_CBPA	Ot09g03180	OSTLU_33586	MICPUN_91845	MICPUCDRAFT_46695	VOLCADRAFT_73479
[KO:K02995]	---	small subunit ribosomal protein S8e	CHLREDRAFT_195605		H632_c540p0	contig-540	a456r1182		jgi|ChlNC64A_1|12480|gw1.23.90.1	scaffold_23	CBPS_CBWC_CBWF_8_20		jgi|Coc_C169_1|23362|estExt_Genewise1.C_60402	scaffold_6	1499_1_CBOZ_CBPA	Ot14g02710	OSTLU_29541	MICPUN_95694	MICPUCDRAFT_34143	VOLCADRAFT_72506
[KO:K02997]	---	small subunit ribosomal protein S9e	CHLREDRAFT_195593		H632_c551p0	contig-551	a1963r2258		jgi|ChlNC64A_1|30467|estExt_Genewise1.C_50520	scaffold_5	CBPS_CBWC_CBWF_1233_1		jgi|Coc_C169_1|8389|gw1.6.353.1	scaffold_6			OSTLU_94716	MICPUN_93744	MICPUCDRAFT_49506	VOLCADRAFT_110081
[KO:K02998]	---	small subunit ribosomal protein SAe	CHLREDRAFT_126059		H632_c144p0	contig-144	a1433r1817		jgi|ChlNC64A_1|134066|IGS.gm_10_00357	scaffold_10	CBPS_CBWC_CBWF_8_30		jgi|Coc_C169_1|6456|gw1.14.218.1	scaffold_14	963_1_CBOZ_CBPA	Ot03g03270	OSTLU_12355	MICPUN_107814	MICPUCDRAFT_13384	VOLCADRAFT_73024
03013_RNA_transport
[KO:K00784]	3.1.26.11	ribonuclease Z	CHLREDRAFT_153259, 171949		H632_c1721p0	contig-1721	a19134r116		jgi|ChlNC64A_1|136203|IGS.gm_15_00299, |53306|fgenesh3_pg.C_scaffold_14000216	scaffold_15, 14	CBPS_CBWC_CBWF_480_1		jgi|Coc_C169_1|38841|fgenesh1_pg.1_#_34, |4001|gw1.13.112.1	scaffold_1, 2		Ot02g05150, Ot03g05020, Ot11g00150	OSTLU_12268, 26345, 37507, 86123	MICPUN_61890, 79930, 81940	MICPUCDRAFT_18700, 5692, 71073	VOLCADRAFT_103834, 118548, 80918
[KO:K02516]	2.1.1.125	protein arginine N-methyltransferase 5	CHLREDRAFT_114319		H632_c87p2	contig-87	a12604r247		jgi|ChlNC64A_1|50707|fgenesh3_pg.C_scaffold_4000206	scaffold_4			jgi|Coc_C169_1|46595|estExt_fgenesh1_pg.C_40101	scaffold_4	2960_1_CBOZ_CBPA	Ot09g03510	OSTLU_34972	MICPUN_86035	MICPUCDRAFT_45363	VOLCADRAFT_56541
[KO:K03113]	---	translation initiation factor 1	CHLREDRAFT_145043		H632_c495p1	contig-495	a2465r1281		jgi|ChlNC64A_1|133842|IGS.gm_10_00133	scaffold_10	CBPS_CBWC_CBWF_0_0_CBWF761.b1		jgi|Coc_C169_1|37709|fgenesh1_pm.14_#_143	scaffold_14	636_1_CBOZ_CBPA	Ot17g01900	OSTLU_37721	MICPUN_58991	MICPUCDRAFT_37644	VOLCADRAFT_109710
[KO:K03231]	---	elongation factor 1-alpha	CHLREDRAFT_132905, 134382		H632_c346p0	contig-346	a11r25209		jgi|ChlNC64A_1|48725|fgenesh3_pm.C_scaffold_7000020	scaffold_7	CBPS_CBWC_CBWF_312_2		jgi|Coc_C169_1|35451|fgenesh1_pm.3_#_126	scaffold_3	355_1_CBOZ_CBPA	Ot13g00910	OSTLU_27060, 27198, 29711	MICPUN_91047, 91112	MICPUCDRAFT_33445, 49684	VOLCADRAFT_102756, 103661
[KO:K03236]	---	translation initiation factor 1A	CHLREDRAFT_141865		H632_c1213p0	contig-1213	a9241r572		jgi|ChlNC64A_1|141952|IGS.gm_4_00093	scaffold_4	CBPS_CBWC_CBWF_8_44		jgi|Coc_C169_1|32198|fgenesh1_kg.2_#_83_#_1133_0_CBOZ10375.b1_CBOZ_CBPA	scaffold_2	1133_0_CBOZ10375.b1_CBOZ_CBPA		OSTLU_13193, 89884	MICPUN_94512	MICPUCDRAFT_35013	VOLCADRAFT_81856
[KO:K03237]	---	translation initiation factor 2 subunit 1	CHLREDRAFT_114912		H632_c3070p0	contig-3070	a11655r297		jgi|ChlNC64A_1|48881|fgenesh3_pm.C_scaffold_12000021	scaffold_12	CBPS_CBWC_CBWF_756_1		jgi|Coc_C169_1|5473|gw1.11.171.1	scaffold_11	1340_1_CBOZ_CBPA	Ot02g03060	OSTLU_119592	MICPUN_107420	MICPUCDRAFT_49642	VOLCADRAFT_105035
[KO:K03238]	---	translation initiation factor 2 subunit 2	CHLREDRAFT_102338		H632_c197p1	contig-197	a2591r976		jgi|ChlNC64A_1|11764|gw1.25.113.1	scaffold_25	CBPS_CBWC_CBWF_0_0_CBWF6378.b1		jgi|Coc_C169_1|13905|e_gw1.4.660.1	scaffold_4	32_1_CBOZ_CBPA	Ot12g02870	OSTLU_88846	MICPUN_78847	MICPUCDRAFT_5614	VOLCADRAFT_79745
[KO:K03239]	---	translation initiation factor eIF-2B subunit alpha	CHLREDRAFT_596		H632_c2476p0	contig-2476	a46884r76		jgi|ChlNC64A_1|20166|e_gw1.3.219.1	scaffold_3	CBPS_CBWC_CBWF_3837_0_CBWF3976.b1		jgi|Coc_C169_1|37120|fgenesh1_pm.11_#_17	scaffold_11	4170_1_CBOZ_CBPA					VOLCADRAFT_108022
[KO:K03241]	---	translation initiation factor eIF-2B subunit gamma	CHLREDRAFT_193588		H632_c2495p0	contig-2495	a222155r16		jgi|ChlNC64A_1|18338|e_gw1.1.143.1	scaffold_1			jgi|Coc_C169_1|37043|fgenesh1_pm.10_#_131	scaffold_10			OSTLU_31337	MICPUN_62311	MICPUCDRAFT_47974	VOLCADRAFT_120926
[KO:K03242]	---	translation initiation factor 2 subunit 3	CHLREDRAFT_126673		H632_c946p1	contig-946	a6267r474		jgi|ChlNC64A_1|48873|fgenesh3_pm.C_scaffold_12000013	scaffold_12	CBPS_CBWC_CBWF_1087_0_CBWC4253.b1		jgi|Coc_C169_1|15406|e_gw1.7.165.1	scaffold_7	0_0_CBOZ6154.b1_CBOZ_CBPA	Ot06g04260	OSTLU_32338	MICPUN_97729	MICPUCDRAFT_28977	VOLCADRAFT_81202
[KO:K03243]	---	translation initiation factor 5B	CHLREDRAFT_141272		H632_c285p0	contig-285	a22818r137		jgi|ChlNC64A_1|34815|estExt_Genewise1Plus.C_50598	scaffold_5	CBPS_CBWC_CBWF_846_1		jgi|Coc_C169_1|38266|fgenesh1_pm.19_#_88	scaffold_19	4501_0_CBOZ2073.b1_CBOZ_CBPA	Ot03g04660	OSTLU_48964	MICPUN_55463		VOLCADRAFT_121350
[KO:K03245]	---	translation initiation factor 3 subunit J	CHLREDRAFT_170004		H632_c734p0	contig-734	a10158r539		jgi|ChlNC64A_1|144733|IGS.gm_8_00061	scaffold_8			jgi|Coc_C169_1|42592|fgenesh1_pg.10_#_95	scaffold_10	5143_1_CBOZ_CBPA	Ot10g02260	OSTLU_26180	MICPUN_59947	MICPUCDRAFT_50415	VOLCADRAFT_120412
[KO:K03246]	---	translation initiation factor 3 subunit I	CHLREDRAFT_79571		H632_c812p0	contig-812	a14556r309		jgi|ChlNC64A_1|17736|gw1.8.464.1	scaffold_8	CBPS_CBWC_CBWF_0_0_CBWC1841.b1		jgi|Coc_C169_1|37085|fgenesh1_pm.10_#_173	scaffold_10	2061_1_CBOZ_CBPA	Ot06g00590	OSTLU_49739	MICPUN_56609	MICPUCDRAFT_17773	VOLCADRAFT_77478
[KO:K03247]	---	translation initiation factor 3 subunit H	CHLREDRAFT_193677		H632_c611p1	contig-611	a10091r281		jgi|ChlNC64A_1|134622|IGS.gm_12_00008	scaffold_12			jgi|Coc_C169_1|35156|fgenesh1_pm.2_#_166	scaffold_2	2727_1_CBOZ_CBPA	Ot13g03050	OSTLU_19171, 41604	MICPUN_108235	MICPUCDRAFT_49525	VOLCADRAFT_105487
[KO:K03248]	---	translation initiation factor 3 subunit G	CHLREDRAFT_167137		H632_c2502p0	contig-2994	a8567r676		jgi|ChlNC64A_1|24186|e_gw1.12.566.1	scaffold_12	CBPS_CBWC_CBWF_0_0_CBWF1422.g1		jgi|Coc_C169_1|6819|gw1.1.603.1	scaffold_1	1468_1_CBOZ_CBPA	Ot06g04320	OSTLU_6420	MICPUN_94842	MICPUCDRAFT_28963
[KO:K03249]	---	translation initiation factor 3 subunit F	CHLREDRAFT_120842		H632_c249p1	contig-249	a11471r345		jgi|ChlNC64A_1|134176|IGS.gm_11_00022	scaffold_11	CBPS_CBWC_CBWF_3884_0_CBWF5081.b1		jgi|Coc_C169_1|35682|fgenesh1_pm.4_#_84	scaffold_4	1025_1_CBOZ_CBPA	Ot02g06740	OSTLU_86356	MICPUN_61417	MICPUCDRAFT_45955	VOLCADRAFT_81211
[KO:K03250]	---	translation initiation factor 3 subunit E	CHLREDRAFT_132936		H632_c1065p0	contig-1065	a4129r687		jgi|ChlNC64A_1|49099|fgenesh3_pm.C_scaffold_22000012	scaffold_22			jgi|Coc_C169_1|35100|fgenesh1_pm.2_#_110	scaffold_2	3576_1_CBOZ_CBPA	Ot13g02570	OSTLU_27220, 29689	MICPUN_108491	MICPUCDRAFT_26784
[KO:K03251]	---	translation initiation factor 3 subunit D	CHLREDRAFT_181144		H632_c1575p0	contig-1575	a7793r401		jgi|ChlNC64A_1|36824|estExt_Genewise1Plus.C_220031	scaffold_22	CBPS_CBWC_CBWF_1709_1		jgi|Coc_C169_1|28243|estExt_Genewise1Plus.C_50167	scaffold_5	2657_2_CBOZ_CBPA	Ot08g00380	OSTLU_46324	MICPUN_59587	MICPUCDRAFT_47232	VOLCADRAFT_84666
[KO:K03252]	---	translation initiation factor 3 subunit C	CHLREDRAFT_140639		H632_c729p0	contig-4995	a27688r98		jgi|ChlNC64A_1|59104|estExt_fgenesh3_pg.C_260030	scaffold_26	CBPS_CBWC_CBWF_281_0_CBWC1534.b1		jgi|Coc_C169_1|399|gw1.17.6.1	scaffold_17	5064_0_CBOZ7916.g1_CBOZ_CBPA	Ot02g04700	OSTLU_119599		MICPUCDRAFT_59561	VOLCADRAFT_103345
[KO:K03253]	---	translation initiation factor 3 subunit B	CHLREDRAFT_128636		H632_c126p1	contig-126	a622r449		jgi|ChlNC64A_1|136163|IGS.gm_15_00259	scaffold_15	CBPS_CBWC_CBWF_75_1		jgi|Coc_C169_1|53345|estExt_fgenesh1_pm.C_70049	scaffold_7	3893_1_CBOZ_CBPA	Ot15g01870	OSTLU_51414	MICPUN_96672	MICPUCDRAFT_59878	VOLCADRAFT_77922
[truncated: 686 more rows]

## Sheet: Table S1 with KEGG protein IDs
Table S1: Distribution of the Chlamydomonas reinhardtii KEGG metabolic pathways in the trebouxiophytes Helicosporidium, Chlorella and Coccomyxa and other green algae.
[truncated: 1,996 more rows]
