# Supplementary material for: A Lack of Parasitic Reduction in the Obligate Parasitic Green Alga Helicosporidium
Source: PLoS Genet. 2014 May 8;10(5):e1004355. doi: 10.1371/journal.pgen.1004355 (PMC4014436; doi:10.1371/journal.pgen.1004355)
Supplement: Table S2 — Enzymes that are bypassed or lost in Helicosporidium non-photosynthetic pathways. The Dicer [K11592; EC:3.1.26.-] and Argonaute [K11596] proteins absent from Helicosporidium are not included in the table; the only KEGG pathway currently including Dicer/Argonaute proteins relates to cancer. (XLSX) [file pgen.1004355.s019.xlsx]

## Sheet: Sheet1
Table S2: Enzymes that are bypassed or lost in Helicosporidium non-photosynthetic pathways
KEGG orthology	Pathway name	Enzyme (EC)	Definition	Status
ko00010	Glycolysis/gluconeogenesis	4.1.1.1	pyruvate decarboxylase	Bypassed by alternative branches
ko00010	Glycolysis/gluconeogenesis	2.7.1.1	hexokinase	Bypassed by alternative branches
ko00051	Fructose and mannose metabolism	2.7.1.1	hexokinase	Bypassed by alternative branches
ko00052	Galactose metabolism	2.7.1.1	hexokinase	Bypassed by alternative branches
ko00052	Galactose metabolism	3.2.1.23	beta-galactosidase	Bypassed by alternative branches
ko00053	Ascorbate and aldarate metabolism	1.13.99.1	inositol oxygenase	Lost (myo-inositol to D-glucoronate), D-glucoronate available via alternative branches
ko00130	Ubiquinone and other terpenoid-quinone biosynthesis	VTE3	MPBQ/MSBQ methyltransferase	Lost (plastoquinone-9; electron carrier)
ko00230	Purine metabolism	3.6.1.13	ADP-ribose pyrophosphatase	Bypassed by 5.4.2.2
ko00230	Purine metabolism	4.6.1.2	guanylate cyclase soluble subunit alpha	Bypassed by alternative branches
ko00230	Purine metabolism	3.5.4.3	guanine deaminase	Bypassed by alternative branches
ko00240	Pyrimidine metabolism	2.4.2.9	uracil phosphoribosyltransferase	Bypassed by 2.7.1.48, 3.1.3.5 and 3.2.2.3
ko00240	Pyrimidine metabolism	2.7.1.21	thymidine kinase	Bypassed by 3.5.4.12, 3.1.3.5 and 3.5.4.5
ko00380	Tryptophan metabolism	1.13.11.52	indoleamine 2,3-dioxygenase	Lost (N-Formyl-kynurenine and derivatives)
ko00400	Phenylalanine, tyrosine and tryptophan metabolism	4.1.1.48	indole-3-glycerol phosphate synthase	Bypassed by alternative branches
ko00410	B-alanine metabolism	4.1.1.9	malonyl-CoA decarboxylase	Bypassed by alternative branches, but direct conversion Malonyl-CoA <-> Acetyl-CoA lost
ko00500	Starch and sucrose metabolism	2.7.1.1	hexokinase	Bypassed by alternative branches
ko00500	Starch and sucrose metabolism	3.2.1.2	beta-amylase	Bypassed by alternative branches
ko00510	N-glycan biosynthesis	3.6.1.43	dolichyldiphosphatase	Bypassed by alternative branches
ko00520	Amino acid sugar and nucleotide metabolism	2.7.1.1	hexokinase	Bypassed by alternative branches
ko00561	Glycerolipid	2.4.1.46	1,2-diacylglycerol 3-beta-galactosyltransferase	Bypassed by alternative branches
ko00561	Glycerolipid	SQD2	sulfoquinovosyltransferase	Lost (1,2-Diacyl-3'(6'-sulfo-alpha-D-quinovosyl-sn-glycerol))
ko00562	Inositol phosphate metabolism	1.13.99.1	inositol oxygenase	Bypassed by alternative branches
ko00564	Glycerophospholipid metabolism	BTA1	betaine lipid synthase	Lost (DGHS + DGTS)
ko00564	Glycerophospholipid metabolism	3.1.1.5	lysophospholipase	Bypassed, sn-glycerol-3-phosphate produced by the glycerolipid metabolism pathway instead (ko00561)
ko00564	Glycerophospholipid metabolism	3.1.4.46	glycerophosphoryl diester phosphodiesterase	Bypassed, sn-glycerol-3-phosphate produced by the glycerolipid metabolism pathway instead (ko00561)
ko00600	Sphingolipid metabolism	3.2.1.23	beta-galactosidase	Conversion from lactosylceramide to glucosylceramide lost
ko00600	Sphingolipid metabolism	3.1.4.2	sphingomyelin phosphodiesterase	Sphingomyelin modification lost
ko00620	Pyruvate metabolism	2.7.9.1	pyruvate, orthophosphate dikinase	Bypassed by 2.7.1.40
ko00630	Glyoxylate and dicarboxylate metabolism	3.1.3.18	phosphoglycolate phosphatase	Lost, converts phosphoglycolate from Rubisco to glycolate
ko00630	Glyoxylate and dicarboxylate metabolism	4.1.1.39	ribulose-bisphosphate carboxylase large chain	Bypassed by alternate branch, links to carbon fixation pathway
ko00640	Propanoate metabolism	4.1.1.9	malonyl-CoA decarboxylase	Bypassed by 6.4.1.2
ko00730	Tiamine metabolism	ThiC	thiamine biosynthesis protein ThiC	Lost, links the purine and thiamine metabolism pathways. Both pathways are functional and have other inputs/outputs
ko00900	Terpenoid backbone synthesis	1.3.1.83	geranylgeranyl reductase	Lost (phytyl-PP)
ko00910	Nitrogen metabolism	3.5.1.49	formamidase	Lost the conversion of formamide to formate
ko00970	Aminoacyl-tRNA biosynthesis	2.71.164	O-phosphoseryl-tRNA(Sec) kinase	Lost (O-phosphoseryl-tRNA(Sec))
ko00970	Aminoacyl-tRNA biosynthesis	2.9.1.2	O-phospho-L-seryl-tRNASec:L-selenocysteinyl-tRNA synthase	Lost (L-Selenosysteinyl-tRNA(Sec))
Note: Dicer [K11592; EC:3.1.26.-] and Argonaute [K11596] proteins absent from Helicosporidium are not included in the table; the only KEGG pathway currently including Dicer/Argonaute proteins relates to cancer.
